# Supplementary material for: Insights into N-heterocyclic carbene and Lewis acid cooperatively catalyzed oxidative [3 + 3] annulation reactions of α,β-unsaturated aldehyde with 1,3-dicarbonyl compounds
Source: Royal Society of Chemistry journal article supplement (doi:10.1039/d0qo00091d), 2020-01-01
Supplement: d0qo00091d1.pdf [file d0qo00091d1.pdf]

**SUPPORTING INFORMATION FOR**

**Insights into N-heterocyclic carbene and Lewis acid cooperatively  
catalyzed oxidative [3+3] annulation reactions of  $\alpha$ ,  $\beta$ -unsaturated  
aldehyde with 1,3-dicarbonyl compounds**

Xinghua Wang<sup>a</sup>, Yang Wang,<sup>b</sup> Jinshuai Song,<sup>\*a</sup> and Donghui Wei<sup>\*a</sup>

<sup>a</sup> College of Chemistry, and Institute of Green Catalysis, Zhengzhou University, 100 Science Avenue, Zhengzhou, Henan, 450001, P. R. China

<sup>b</sup> Department of Material and Chemical Engineering, Zhengzhou University of Light Industry, 136 Science Avenue, Zhengzhou, Henan Province, 450002, P.R. China

E-mail: jssong@zzu.edu.cn; donghuiwei@zzu.edu.cn

## Contents

|                                                                                                                       |     |
|-----------------------------------------------------------------------------------------------------------------------|-----|
| Part 1: The possible proton transfer processes for the formation of the Breslow intermediate.....                     | S3  |
| Part 2: The relative Gibbs free energy profiles for formation of <b>R2<sup>1</sup></b> .....                          | S3  |
| Part 3: NBO analysis for deprotonation of <b>R2</b> with or without the presence of LiCl .....                        | S4  |
| Part 4: Comparison of different coordination modes of LA .....                                                        | S4  |
| Part 5: The possible proton transfer processes for the formation of <b>M7R</b> ...                                    | S5  |
| Part 6: Quantitative NCI analysis for transition state <b>TS5S</b> .....                                              | S7  |
| Part 7: Computational details of global reactivity index (GRI) analysis and Boltzmann distribution.....               | S5  |
| Part 8: Test results of the different computational methods .....                                                     | S8  |
| Part 9: Optimized geometries of some stationary points .....                                                          | S8  |
| Part 10: Absolute single-point energies and Gibbs free energy (GFE) of the structures optimized at the L1 level ..... | S10 |
| Part 11: List of the Cartesian coordinates of all the SPs involved in the reaction .....                              | S12 |

**Part 1: The possible proton transfer processes for the formation of the Breslow intermediate**

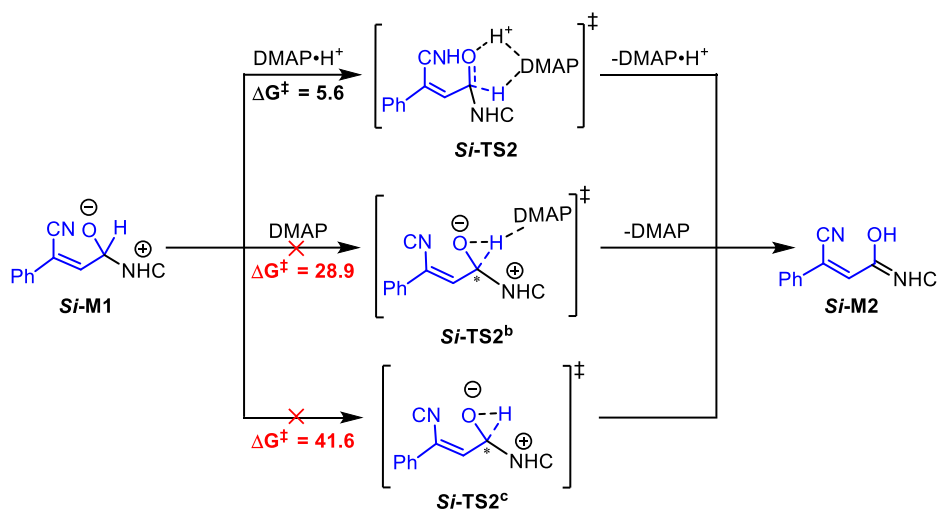

**Fig. S1** The possible proton transfer processes for the formation of the Breslow intermediate (unit: kcal/mol)

**Part 2: The relative Gibbs free energy profiles for formation of R2<sup>1</sup>**

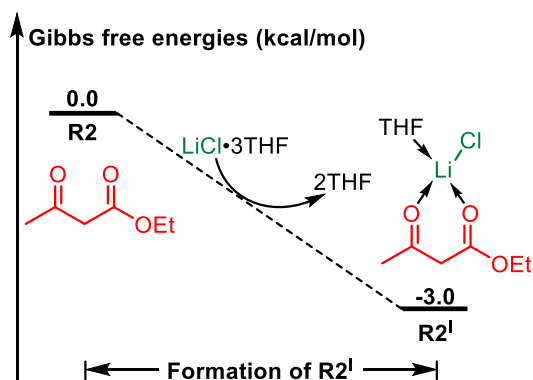

**Fig. S2** The relative Gibbs free energy profiles for formation of R2<sup>1</sup>

### Part 3: NBO analysis for deprotonation of R2 with or without the presence of LiCl

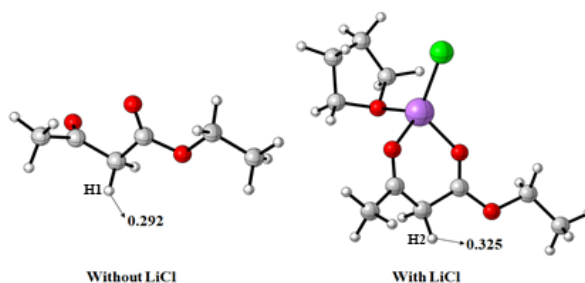

Fig. S3 NBO analysis for R2 and R2<sup>1</sup> (unit: e)

### Part 4: Comparison of different coordination modes of LA

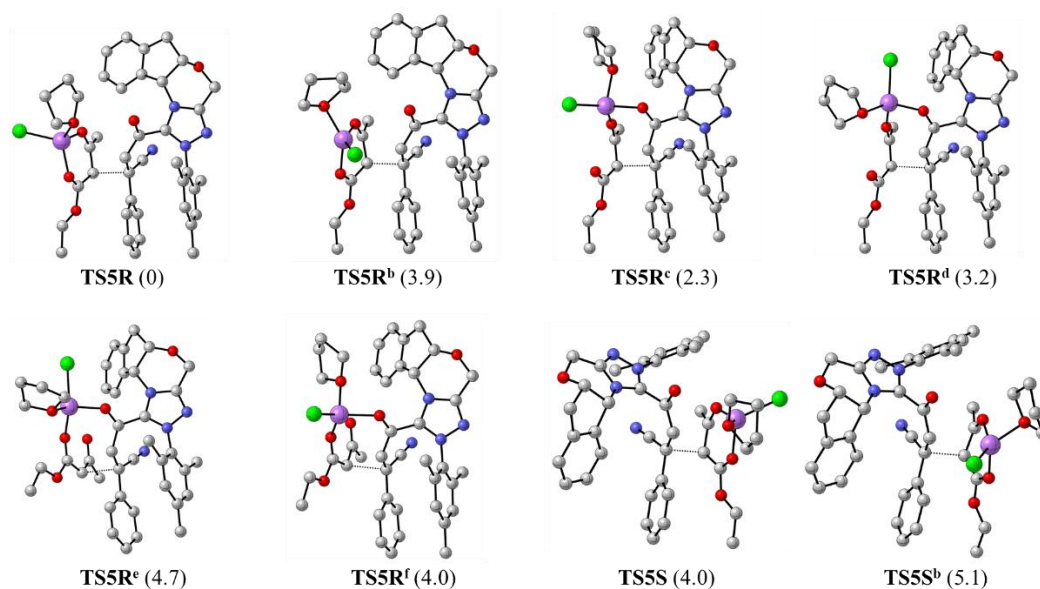

Fig. S4 Comparison of relative Gibbs free energies ( $\Delta\Delta G$ ) of different coordination models of LA (unit: Å)

Table S1 Comparison of relative Gibbs free energies ( $\Delta\Delta G$ ) of different coordination models of LA

| Coordination model | SPs               | $\Delta G^+$ (kcal/mol) |
|--------------------|-------------------|-------------------------|
| <b>model A</b>     | TS5R              | 0                       |
|                    | TS5R <sup>b</sup> | 3.9                     |
|                    | TS5S              | 4.0                     |
|                    | TS5S <sup>b</sup> | 5.1                     |
| <b>model B</b>     | TS5R <sup>c</sup> | 2.3                     |

|         |                   |     |
|---------|-------------------|-----|
|         | TS5R <sup>d</sup> | 3.2 |
| model C | TS5R <sup>e</sup> | 4.7 |
|         | TS5R <sup>f</sup> | 4.0 |

## Part 5: The possible proton transfer processes for the formation of M7R

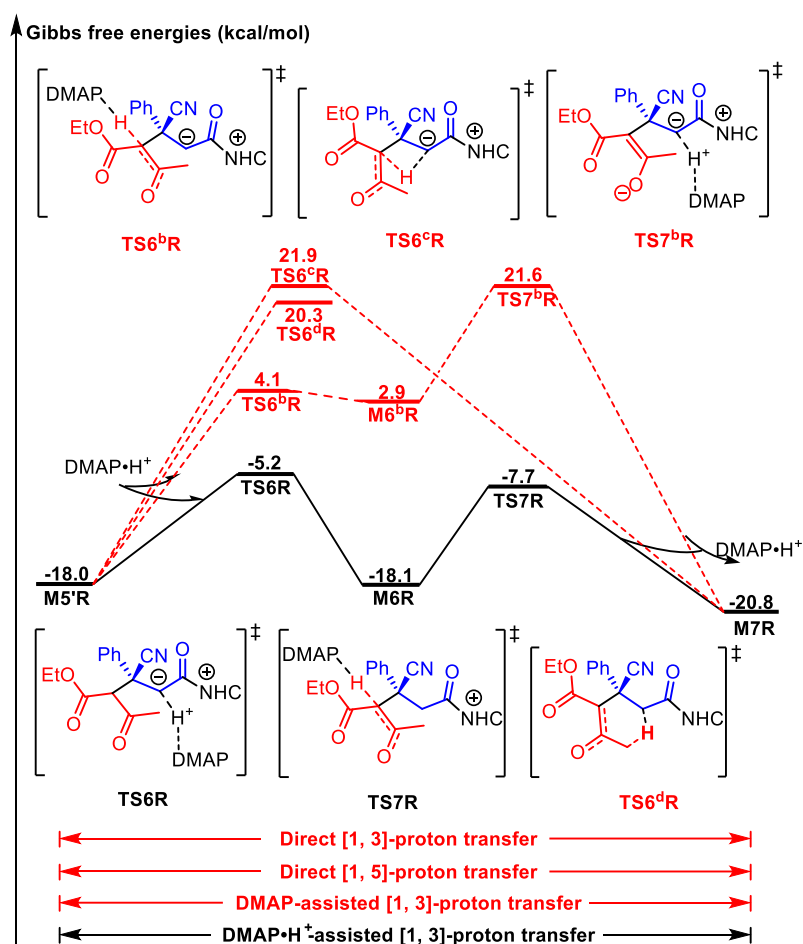

Fig. S5 The relative Gibbs free energy profiles for the possible proton transfer pathways

## Part 6: Computational details of global reactivity index (GRI) analysis and Boltzmann distribution

For the global reactivity index (GRI) analysis, the relevant parameters of GRI, i.e., electrophilicity index  $\omega^1$ , electronic chemical potential  $\mu$ , chemical hardness  $\eta$ ,

one-electron energies of the frontier molecular orbital HOMO ( $E_L$ ) and LUMO ( $E_H$ ), The HOMO energies obtained within the Kohn–Sham scheme,<sup>2</sup> nucleophilicity index  $N^3$  was generally utilized to judge the nucleophilicity character.

**Table S2** Energy of HOMO ( $E_H$ ), LUMO ( $E_L$ ), electronic chemical potential ( $\mu$ ), chemical hardness ( $\eta$ ), global electrophilicity ( $\omega$ ) and global nucleophilicity ( $N$ ) of SPs

|            | SP              | $E_H$ (a.u.) | $E_L$ (a.u.) | $\mu$ (eV) | $\eta$ (eV) | $\omega$ (eV) | $N^a$ (eV) | $\omega+N$ (eV) |
|------------|-----------------|--------------|--------------|------------|-------------|---------------|------------|-----------------|
| [3+2]      | Si-M2           | -0.19021     | -0.02458     | -0.107     | 0.166       | -             | 5.130      | <b>6.759</b>    |
| annulation | R2 <sup>l</sup> | -0.29565     | -0.04839     | -0.172     | 0.247       | 1.629         | -          |                 |
| [3+3]      | R2 <sup>l</sup> | -0.21623     | 0.06991      | -0.073     | 0.286       | -             | 4.422      | <b>8.452</b>    |
| annulation | M3              | -0.31328     | -0.13989     | -0.227     | 0.173       | 4.029         | -          |                 |

a  $E_H(\text{TCE}) = -0.37872$  a.u. (calculated at the M06-2X/6-31G(d, p)/IEF-PCMTHF level).

In addition, the extent of enantioselectivity, in terms of enantiomeric excess (ee %), was calculated by using the Boltzmann distribution of diastereomeric transition states with the following equations:

$$\frac{[R]}{[S]} = \frac{\exp(-\Delta G_{[R]}^\ddagger / RT)}{\exp(-\Delta G_{[S]}^\ddagger / RT)} = \exp(\Delta\Delta G^\ddagger / RT)$$

$$ee = \frac{[R] - [S]}{[R] + [S]} \times 100\% = \frac{\frac{[R]}{[S]} - 1}{\frac{[R]}{[S]} + 1} \times 100\%$$

where  $\Delta G^\ddagger$  is the Gibbs free energy barrier of the competing diastereomeric transition state and  $\Delta\Delta G^\ddagger$  is the Gibbs free energy difference between the two diastereomeric transition states.

## Part 7: Quantitative NCI analysis for transition state TS5S

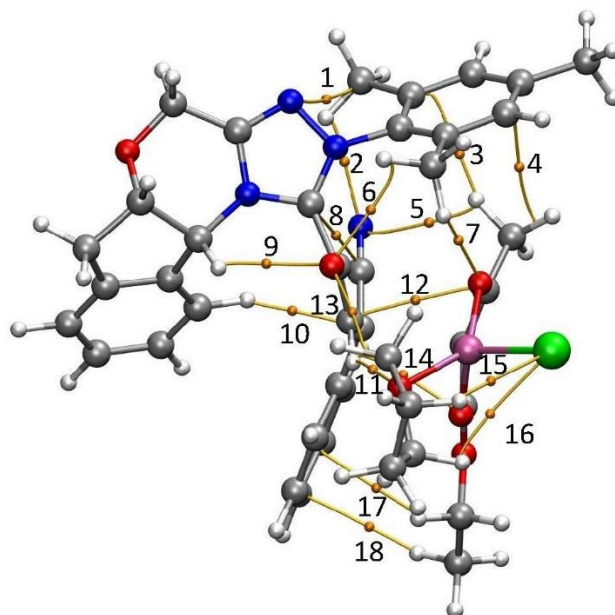

**Fig. S6** Bond Critical Points (BCPs, color in orange) along the Bond Paths (color in yellow) for topological analysis of TS5S

**Table S3** Summary of distance, type of interaction, electron densities ( $\rho_{bcp}$ ), Lagrangian kinetic energies ( $G_b$ ), potential energy densities ( $V_b$ ), energy densities ( $H_b$ ), Laplacian of electron densities ( $\nabla^2\rho$ ) at the bond critical points (BCPs) along the bond paths in TS5R (the bond lengths are in Å, others are in a.u.)

| BCP index | Type of interaction | Distance | $\rho_{bcp} * 10^{-2}$ | $G_b * 10^{-2}$ | $V_b * 10^{-2}$ | $H_b * 10^{-3}$ | $\nabla^2\rho * 10^{-1}$ |
|-----------|---------------------|----------|------------------------|-----------------|-----------------|-----------------|--------------------------|
| 1         | C-H...N             | 2.64     | 1.1878                 | 1.0774          | -0.8686         | 2.0884          | 0.5145                   |
| 2         | C-H...N             | 2.45     | 1.1606                 | 0.8647          | -0.7134         | 1.5134          | 0.4064                   |
| 3         | C-H... $\pi$        | 2.64     | 0.9248                 | 0.6263          | -0.5081         | 1.1817          | 0.2978                   |
| 4         | C-H... $\pi$        | 2.94     | 0.6816                 | 0.4408          | -0.3286         | 1.1221          | 0.2212                   |
| 5         | C-H...N             | 2.71     | 0.7613                 | 0.5183          | -0.4001         | 1.1820          | 0.2546                   |
| 6         | C-H...O             | 2.54     | 1.0938                 | 0.9005          | -0.7537         | 1.4681          | 0.4189                   |
| 7         | C-H...O             | 2.41     | 1.0604                 | 0.8798          | -0.7791         | 1.0063          | 0.3922                   |
| 8         | LP... $\pi$         | 2.98     | 0.9880                 | 0.7144          | -0.5585         | 1.5588          | 0.3481                   |
| 9         | C-H...O             | 2.46     | 1.1454                 | 0.9428          | -0.7949         | 1.4783          | 0.4362                   |

|    |                 |      |        |        |         |        |        |
|----|-----------------|------|--------|--------|---------|--------|--------|
| 10 | C-H $\cdots\pi$ | 2.51 | 1.0579 | 0.7939 | -0.6558 | 1.3805 | 0.3728 |
| 11 | C-H $\cdots$ O  | 2.36 | 1.2728 | 0.9882 | -0.9541 | 0.3416 | 0.4090 |
| 12 | LP $\cdots\pi$  | 2.89 | 1.4017 | 0.9526 | -0.8927 | 0.5987 | 0.4050 |
| 13 | C-H $\cdots$ O  | 2.67 | 0.8602 | 0.7440 | -0.6047 | 1.3926 | 0.3533 |
| 14 | C-H $\cdots$ O  | 2.58 | 1.0299 | 0.7761 | -0.6557 | 1.2043 | 0.3586 |
| 15 | C-H $\cdots$ Cl | 3.10 | 0.5704 | 0.3459 | -0.2580 | 0.8791 | 0.1735 |
| 16 | C-H $\cdots$ Cl | 3.06 | 0.6615 | 0.4273 | -0.3344 | 0.9294 | 0.2081 |
| 17 | C-H $\cdots\pi$ | 2.92 | 0.5988 | 0.3745 | -0.2824 | 0.9215 | 0.1867 |
| 18 | C-H $\cdots\pi$ | 2.87 | 0.5762 | 0.3391 | -0.2562 | 0.8286 | 0.1688 |

## Part 8: Test results of the different computational methods

We have compared the relative Gibbs free energies ( $\Delta\Delta G$ ) of Re/Si-TS1 and Re/Si-M1 optimized at the M06-2X/6-31G(d, p)/IEF-PCM<sub>THF</sub> (L1), B3LYP-D3/6-31G(d, p)/IEF-PCM<sub>THF</sub> (L2),  $\omega$ b97X-D/6-31G(d, p)/IEF-PCM<sub>THF</sub> (L3) levels. As shown in **Table S3**, there are same trend and small energy differences between the stationary points (SPs), indicating the selected method should be proper and reliable in this kind of reaction system.

**Table S4** Comparison of relative Gibbs free energies ( $\Delta\Delta G$ ) of the Re/Si-TS1 and Re/Si-M1 calculated by using the different levels (L1-3) (unit: kcal/mol).

|    | <i>Re</i> -TS1 | <i>Si</i> -TS1 | <i>Re</i> -M1 | <i>Si</i> -M1 |
|----|----------------|----------------|---------------|---------------|
| L1 | 9.1            | 6.2            | 2.0           | 0             |
| L2 | 5.1            | 2.9            | 2.0           | 0             |
| L3 | 8.8            | 4.5            | 3.9           | 0             |

## Part 9: Optimized geometries of some stationary points



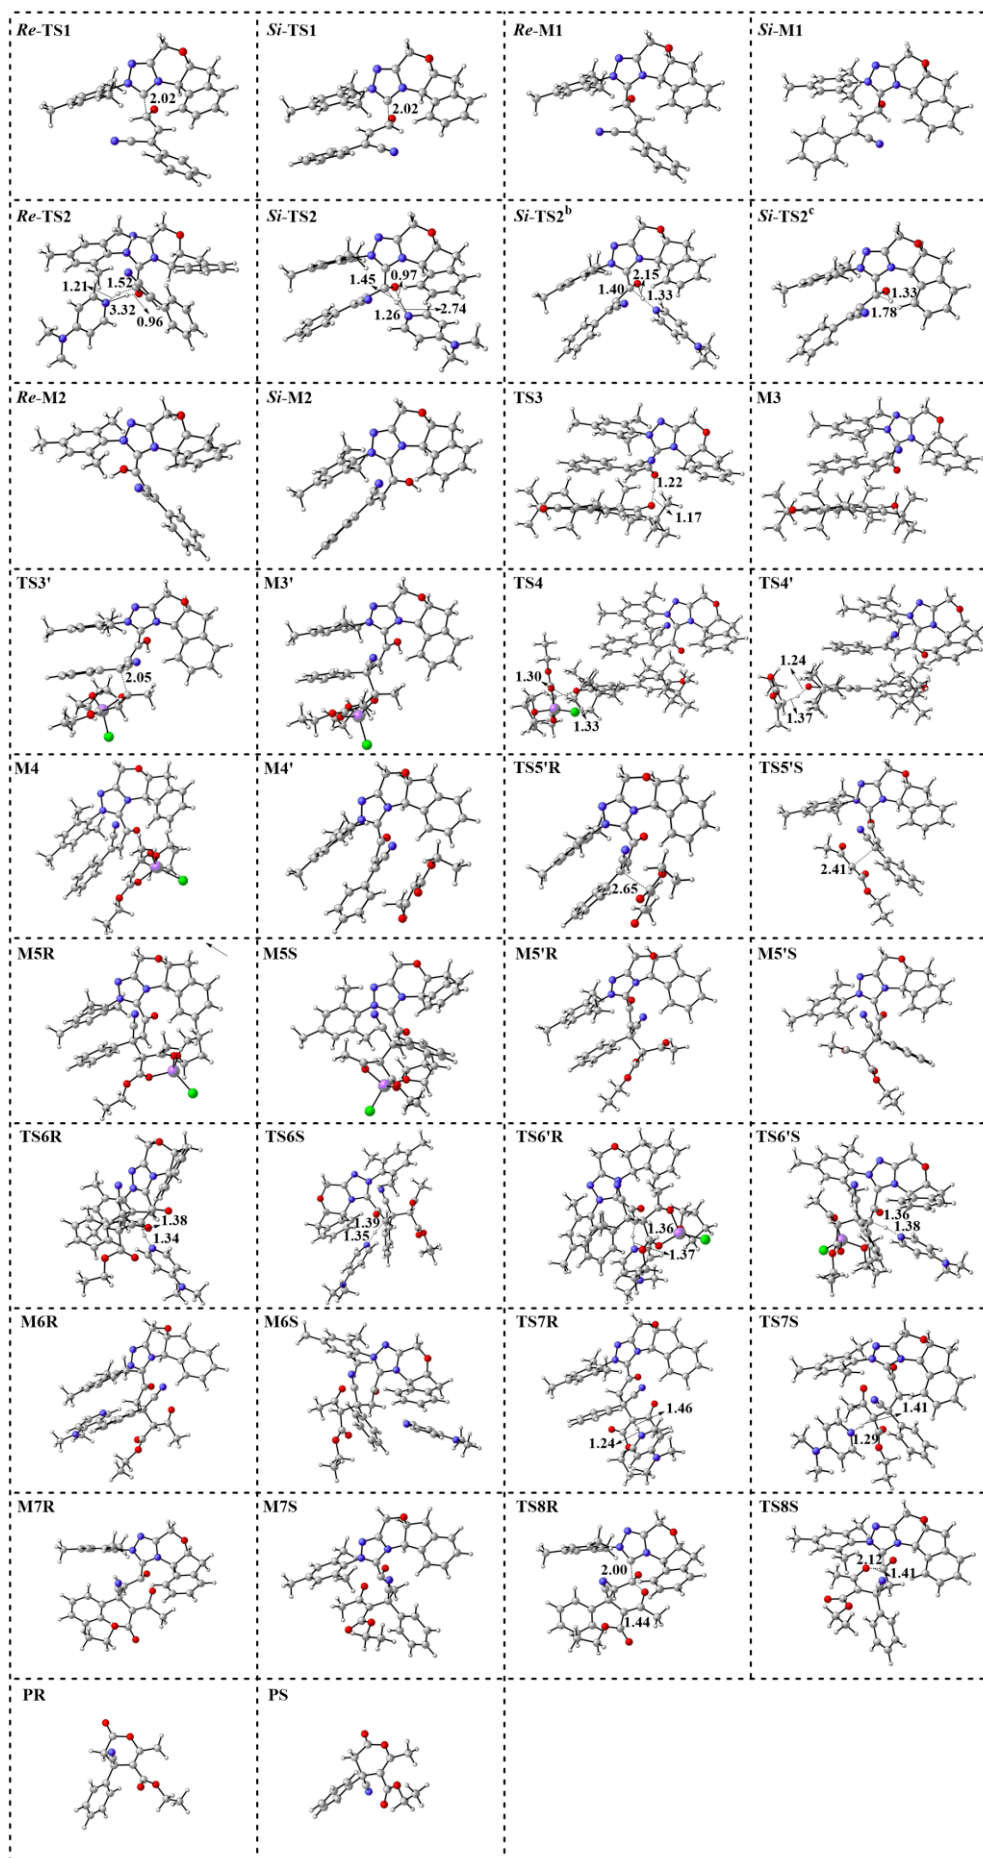

Fig. S7 Optimized geometries of some stationary points (unit: Å)

**Part 10: Absolute single-point energies and Gibbs free energy (GFE)  
of the structures optimized at the L1 level**

Table S5 The single-point and GFE (=E+GFEC) energies of the stationary points involved in the [3+3] annulation reaction of  $\alpha$ ,  $\beta$ -unsaturated aldehyde with 1,3-dicarbonyl compound (unit: a.u.)

| SP                               | GFEC<br>(M06-2X/6-31G(d, p)/<br>IEF-PCM <sub>thf</sub> ) | <i>E</i><br>(M06-2X/6-311++G<br>(2df, 2pd)/IEF-PCM <sub>thf</sub> ) | GFE          |
|----------------------------------|----------------------------------------------------------|---------------------------------------------------------------------|--------------|
| <b>R1</b>                        | 0.106510                                                 | -515.176790                                                         | -515.070280  |
| <b>NHC</b>                       | 0.333127                                                 | -1052.237451                                                        | -1051.904324 |
| <b><i>Re</i>-TS1</b>             | 0.465869                                                 | -1567.421095                                                        | -1566.955226 |
| <b><i>Si</i>-TS1</b>             | 0.469250                                                 | -1567.425617                                                        | -1566.956367 |
| <b><i>Re</i>-M1</b>              | 0.468916                                                 | -1567.432334                                                        | -1566.963418 |
| <b><i>Si</i>-M1</b>              | 0.467671                                                 | -1567.435542                                                        | -1566.967871 |
| <b>DMAP</b>                      | 0.130351                                                 | -382.220503                                                         | -382.090152  |
| <b>DMAP·H<sup>+</sup></b>        | 0.145361                                                 | -382.670355                                                         | -382.524994  |
| <b><i>Re</i>-TS2</b>             | 0.630656                                                 | -1950.109700                                                        | -1949.479044 |
| <b><i>Si</i>-TS2</b>             | 0.632745                                                 | -1950.116679                                                        | -1949.483934 |
| <b><i>Si</i>-TS2<sup>b</sup></b> | 0.617132                                                 | -1949.629027                                                        | -1949.011895 |
| <b><i>Si</i>-TS2<sup>c</sup></b> | 0.465043                                                 | -1567.366544                                                        | -1566.901501 |
| <b><i>Re</i>-M2</b>              | 0.466319                                                 | -1567.443713                                                        | -1566.977394 |
| <b><i>Si</i>-M2</b>              | 0.470209                                                 | -1567.456684                                                        | -1566.986475 |
| <b>DQ</b>                        | 0.559982                                                 | -1241.364134                                                        | -1240.804152 |
| <b>TS3</b>                       | 1.054510                                                 | -2808.823884                                                        | -2807.769374 |
| <b>M3</b>                        | 1.060273                                                 | -2808.834832                                                        | -2807.774559 |
| <b>R2</b>                        | 0.120174                                                 | -460.320291                                                         | -460.200117  |
| <b>LiCl</b>                      | -0.019950                                                | -467.853140                                                         | -467.873090  |

|                         |          |              |              |
|-------------------------|----------|--------------|--------------|
| <b>THF</b>              | 0.090046 | -232.424631  | -232.334585  |
| <b>LiCl·3THF</b>        | 0.309706 | -1165.177155 | -1164.867449 |
| <b>R2<sup>l</sup></b>   | 0.229467 | -1160.632578 | -1160.403111 |
| <b>TS3'</b>             | 0.734370 | -2728.087171 | -2727.352801 |
| <b>M3'</b>              | 0.735337 | -2728.088844 | -2727.353507 |
| <b>TS4</b>              | 1.313436 | -3969.478023 | -3968.164587 |
| <b>TS4'</b>             | 1.199910 | -3269.149967 | -3267.950057 |
| <b>DQH2</b>             | 0.585465 | -1242.614309 | -1242.028844 |
| <b>M4</b>               | 0.705034 | -2726.880597 | -2726.175563 |
| <b>M4'</b>              | 0.592994 | -2026.541370 | -2025.948376 |
| <b>TS5R</b>             | 0.709501 | -2726.871540 | -2726.162039 |
| <b>TS5R<sup>b</sup></b> | 0.712833 | -2726.868690 | -2726.155857 |
| <b>TS5R<sup>c</sup></b> | 0.709735 | -2726.868091 | -2726.158356 |
| <b>TS5R<sup>d</sup></b> | 0.710353 | -2726.867247 | -2726.156894 |
| <b>TS5R<sup>e</sup></b> | 0.704093 | -2726.858509 | -2726.154416 |
| <b>TS5R<sup>f</sup></b> | 0.709144 | -2726.864795 | -2726.155651 |
| <b>TS5S</b>             | 0.708838 | -2726.864068 | -2726.155230 |
| <b>TS5S<sup>b</sup></b> | 0.706975 | -2726.860866 | -2726.153891 |
| <b>TS5'R</b>            | 0.596488 | -2026.538686 | -2025.942198 |
| <b>TS5'S</b>            | 0.594776 | -2026.536083 | -2025.941307 |
| <b>M5R</b>              | 0.711313 | -2726.895454 | -2726.184141 |
| <b>M5S</b>              | 0.710542 | -2726.886988 | -2726.176446 |
| <b>M5'R</b>             | 0.597212 | -2026.575859 | -2025.978647 |
| <b>M5'S</b>             | 0.597882 | -2026.567343 | -2025.969461 |
| <b>TS6R</b>             | 0.757795 | -2409.241100 | -2408.483305 |
| <b>TS6R<sup>b</sup></b> | 0.744589 | -2408.778196 | -2408.033607 |
| <b>TS6R<sup>c</sup></b> | 0.593427 | -2026.508634 | -2025.915207 |
| <b>TS6R<sup>d</sup></b> | 0.593998 | -2026.511625 | -2025.917627 |
| <b>TS6S</b>             | 0.756266 | -2409.233381 | -2408.477115 |

|                         |          |              |              |
|-------------------------|----------|--------------|--------------|
| <b>TS6'R</b>            | 0.872964 | -3109.555428 | -3108.682464 |
| <b>TS6'S</b>            | 0.871662 | -3109.549860 | -3108.678198 |
| <b>M6R</b>              | 0.763119 | -2409.267029 | -2408.503910 |
| <b>M6R<sup>b</sup></b>  | 0.748656 | -2408.784209 | -2408.035553 |
| <b>M6S</b>              | 0.759698 | -2409.256086 | -2408.496388 |
| <b>TS7R</b>             | 0.757855 | -2409.245201 | -2408.487346 |
| <b>TS7R<sup>b</sup></b> | 0.748123 | -2408.753920 | -2408.005797 |
| <b>TS7S</b>             | 0.756940 | -2409.231047 | -2408.474107 |
| <b>M7R</b>              | 0.598387 | -2026.581514 | -2025.983127 |
| <b>M7S</b>              | 0.597700 | -2026.585847 | -2025.988147 |
| <b>TS8R</b>             | 0.596917 | -2026.573559 | -2025.976642 |
| <b>TS8S</b>             | 0.598234 | -2026.574963 | -2025.976729 |
| <b>PR/S</b>             | 0.236134 | -974.331832  | -974.095698  |

## **Part 11: List of the Cartesian coordinates of all the SPs involved in the reaction**

### **NHC**

Zero-point correction= 0.383859

Thermal correction to Energy= 0.404669

Thermal correction to Enthalpy= 0.405613

Thermal correction to Gibbs Free Energy= 0.333127

Sum of electronic and zero-point Energies= -1051.536401

Sum of electronic and thermal Energies= -1051.515590

Sum of electronic and thermal Enthalpies= -1051.514646

Sum of electronic and thermal Free Energies= -1051.587132

Cartesian coordinates

|   |           |           |           |
|---|-----------|-----------|-----------|
| C | 0.240953  | -0.163538 | -0.878205 |
| C | -0.510506 | -1.498545 | 0.782625  |
| C | -2.211311 | -0.732558 | -0.859723 |
| H | -2.184120 | -0.970603 | -1.928536 |
| N | 0.752245  | -1.356976 | 1.043432  |
| N | 1.180291  | -0.540514 | 0.013307  |
| N | -0.849850 | -0.808836 | -0.351907 |

|   |           |           |           |
|---|-----------|-----------|-----------|
| C | -1.541064 | -2.298827 | 1.516236  |
| H | -1.364274 | -2.254251 | 2.591567  |
| H | -1.496801 | -3.349847 | 1.196254  |
| C | -3.138640 | -1.729876 | -0.120268 |
| O | -2.820010 | -1.754617 | 1.264400  |
| C | -4.235287 | 0.379572  | -0.291960 |
| C | -2.898820 | 0.596022  | -0.628361 |
| C | -2.375168 | 1.876896  | -0.733409 |
| C | -3.222081 | 2.959385  | -0.492097 |
| C | -4.561264 | 2.751219  | -0.159479 |
| C | -5.078751 | 1.458586  | -0.057527 |
| C | -4.531884 | -1.102485 | -0.241671 |
| H | -1.329520 | 2.020414  | -0.989887 |
| H | -5.206147 | 3.603511  | 0.029319  |
| H | -6.118888 | 1.300940  | 0.212434  |
| H | -5.018268 | -1.438786 | -1.164182 |
| H | -5.159986 | -1.400151 | 0.601324  |
| C | 2.549818  | -0.125041 | -0.007367 |
| C | 3.422292  | -0.706636 | -0.927808 |
| C | 2.961931  | 0.855902  | 0.901190  |
| C | 4.750340  | -0.273814 | -0.928063 |
| C | 4.296447  | 1.252989  | 0.868724  |
| C | 5.203749  | 0.699295  | -0.038837 |
| H | 5.445948  | -0.712639 | -1.639268 |
| H | 4.635792  | 2.017734  | 1.563537  |
| C | 1.977849  | 1.464423  | 1.863959  |
| H | 1.636801  | 0.724420  | 2.594638  |
| H | 1.089721  | 1.823017  | 1.333379  |
| H | 2.428073  | 2.301773  | 2.399681  |
| C | 6.641305  | 1.152926  | -0.046483 |
| H | 7.128692  | 0.923732  | 0.907103  |
| H | 6.708003  | 2.236602  | -0.194220 |
| H | 7.206086  | 0.664048  | -0.844804 |
| C | 2.937905  | -1.757934 | -1.890283 |
| H | 2.202133  | -1.339561 | -2.582939 |
| H | 2.447294  | -2.578258 | -1.357568 |
| H | 3.770089  | -2.165796 | -2.466657 |
| H | -3.070542 | -2.744064 | -0.535537 |
| H | -2.835683 | 3.971191  | -0.561854 |

Vibrational frequencies

|          |          |          |
|----------|----------|----------|
| 13.3874  | 28.4989  | 50.7851  |
| 67.1567  | 75.2047  | 99.6243  |
| 113.2791 | 147.3435 | 150.0695 |
| 159.6922 | 184.9366 | 197.6527 |

|           |           |           |
|-----------|-----------|-----------|
| 210.0138  | 229.9164  | 235.7202  |
| 262.4069  | 278.4899  | 302.8932  |
| 312.6959  | 327.2254  | 357.4939  |
| 377.3214  | 408.8449  | 436.9825  |
| 470.5965  | 481.1991  | 495.5495  |
| 509.2897  | 524.0712  | 559.3578  |
| 563.4537  | 586.0426  | 589.0416  |
| 612.8904  | 631.4737  | 643.8600  |
| 676.3304  | 705.7943  | 727.5769  |
| 751.2108  | 760.3824  | 764.8636  |
| 788.7948  | 840.4905  | 858.7846  |
| 881.3280  | 888.2176  | 898.7562  |
| 918.6326  | 920.4225  | 952.2067  |
| 964.5206  | 976.7546  | 987.0043  |
| 995.4749  | 1020.3246 | 1021.2566 |
| 1036.4335 | 1041.3367 | 1046.1184 |
| 1061.2011 | 1062.2366 | 1066.4910 |
| 1068.5077 | 1070.0364 | 1079.6463 |
| 1085.5379 | 1112.9981 | 1172.0891 |
| 1174.1707 | 1189.4520 | 1194.6500 |
| 1210.7212 | 1228.4625 | 1249.3389 |
| 1251.1251 | 1273.8958 | 1284.7050 |
| 1289.7466 | 1298.3304 | 1312.9898 |
| 1330.4900 | 1336.6233 | 1349.6379 |
| 1357.0989 | 1375.7799 | 1383.6576 |
| 1399.8779 | 1412.4975 | 1416.6349 |
| 1419.6572 | 1430.7889 | 1446.1445 |
| 1468.0041 | 1472.6411 | 1483.0497 |
| 1485.2549 | 1487.8537 | 1494.0906 |
| 1496.8754 | 1499.6987 | 1500.8951 |
| 1517.0462 | 1525.3908 | 1535.9992 |
| 1568.4765 | 1683.0150 | 1686.6804 |
| 1692.2571 | 1699.6930 | 1704.6591 |
| 3057.0013 | 3057.8685 | 3067.4706 |
| 3075.8520 | 3077.4023 | 3087.4687 |
| 3105.7406 | 3124.9693 | 3135.2399 |
| 3148.0640 | 3151.0218 | 3154.2223 |
| 3163.2494 | 3166.2753 | 3168.7258 |
| 3191.2720 | 3198.8807 | 3205.4419 |
| 3205.8773 | 3213.7134 | 3224.4669 |

## R1

Zero-point correction= 0.143508

Thermal correction to Energy= 0.153781

Thermal correction to Enthalpy= 0.154725  
 Thermal correction to Gibbs Free Energy= 0.106510  
 Sum of electronic and zero-point Energies= -514.867046  
 Sum of electronic and thermal Energies= -514.856773  
 Sum of electronic and thermal Enthalpies= -514.855829  
 Sum of electronic and thermal Free Energies= -514.904045

Cartesian coordinates

|   |           |           |           |
|---|-----------|-----------|-----------|
| C | 3.148010  | -0.490010 | -0.073632 |
| H | 3.453073  | 0.559862  | 0.090093  |
| C | 1.698062  | -0.757678 | -0.116638 |
| H | 1.408905  | -1.789786 | -0.286463 |
| C | 0.762875  | 0.202705  | 0.026627  |
| O | 3.969180  | -1.371009 | -0.210974 |
| C | -0.699937 | -0.020533 | 0.013624  |
| C | -1.569325 | 1.037819  | -0.275904 |
| C | -1.229747 | -1.288651 | 0.286339  |
| C | -2.943152 | 0.826798  | -0.314797 |
| H | -1.168798 | 2.026618  | -0.478381 |
| C | -2.602697 | -1.493355 | 0.250475  |
| H | -0.573350 | -2.110254 | 0.553121  |
| C | -3.462537 | -0.438250 | -0.053564 |
| H | -3.606473 | 1.652789  | -0.547458 |
| H | -3.004047 | -2.476960 | 0.469931  |
| H | -4.534732 | -0.601930 | -0.077894 |
| C | 1.191495  | 1.576088  | 0.197894  |
| N | 1.501957  | 2.682591  | 0.331757  |

Vibrational frequencies

|           |           |           |
|-----------|-----------|-----------|
| 33.3464   | 91.7796   | 112.2723  |
| 142.8419  | 169.6563  | 228.5987  |
| 299.6536  | 324.5149  | 354.0730  |
| 410.6589  | 451.8797  | 496.2952  |
| 520.0820  | 626.8500  | 671.2315  |
| 674.7174  | 707.2344  | 789.3875  |
| 805.6129  | 870.3233  | 899.8275  |
| 960.7472  | 983.2025  | 1006.4789 |
| 1019.4087 | 1034.7641 | 1039.4261 |
| 1071.9629 | 1127.8043 | 1161.1211 |
| 1183.7987 | 1215.3757 | 1272.2748 |
| 1319.5174 | 1355.8845 | 1368.8967 |
| 1437.7934 | 1502.8322 | 1549.8226 |
| 1668.0679 | 1692.9766 | 1703.8369 |
| 1838.0952 | 2406.8355 | 3055.5693 |
| 3209.0900 | 3213.9625 | 3218.6474 |
| 3226.7556 | 3232.1359 | 3234.9801 |

**Re-TS1**

Zero-point correction= 0.529824

Thermal correction to Energy= 0.561373

Thermal correction to Enthalpy= 0.562317

Thermal correction to Gibbs Free Energy= 0.465869

Sum of electronic and zero-point Energies= -1566.412283

Sum of electronic and thermal Energies= -1566.380734

Sum of electronic and thermal Enthalpies= -1566.379790

Sum of electronic and thermal Free Energies= -1566.476238

Cartesian coordinates

|   |           |           |           |
|---|-----------|-----------|-----------|
| C | -0.608116 | 0.228912  | 2.033012  |
| C | 0.583733  | 1.081432  | 1.700344  |
| C | 0.557384  | 2.216326  | 0.982227  |
| O | -0.488816 | -0.653197 | 2.907458  |
| C | 1.762684  | 2.986352  | 0.588731  |
| C | 1.780543  | 3.693920  | -0.618152 |
| C | 2.917804  | 2.955528  | 1.378715  |
| C | 2.939879  | 4.340030  | -1.038056 |
| H | 0.886859  | 3.728616  | -1.235107 |
| C | 4.073488  | 3.601011  | 0.956120  |
| H | 2.906960  | 2.437458  | 2.332677  |
| C | 4.090586  | 4.291342  | -0.255017 |
| H | 2.942077  | 4.881313  | -1.978428 |
| H | 4.961692  | 3.572739  | 1.578583  |
| H | 4.993574  | 4.797008  | -0.580934 |
| C | -0.703632 | 2.641216  | 0.423141  |
| N | -1.702211 | 2.993085  | -0.047767 |
| H | 1.534713  | 0.705939  | 2.073271  |
| H | -1.578584 | 0.733507  | 1.859960  |
| C | -0.766215 | -0.801915 | 0.297614  |
| C | -0.649130 | -2.829409 | -0.606538 |
| C | 1.378580  | -2.064593 | 0.628746  |
| H | 1.343835  | -1.755224 | 1.681428  |
| N | -1.850750 | -2.419653 | -0.887706 |
| N | -1.893211 | -1.165692 | -0.317938 |
| N | 0.034605  | -1.878167 | 0.101896  |
| C | -0.009909 | -4.156711 | -0.886912 |
| H | -0.226313 | -4.477732 | -1.906707 |
| H | -0.412939 | -4.904185 | -0.188893 |
| C | 1.794744  | -3.549182 | 0.512170  |
| O | 1.391420  | -4.049221 | -0.757205 |
| C | 3.618945  | -2.164026 | -0.140630 |
| C | 2.482192  | -1.353129 | -0.125633 |



|   |           |           |           |
|---|-----------|-----------|-----------|
| C | 2.485497  | -0.097320 | -0.715171 |
| C | 3.670591  | 0.369022  | -1.286738 |
| C | 4.817398  | -0.425307 | -1.278106 |
| C | 4.796412  | -1.703128 | -0.715110 |
| C | 3.325629  | -3.496843 | 0.511856  |
| H | 1.585174  | 0.508467  | -0.740379 |
| H | 5.732791  | -0.051725 | -1.725976 |
| H | 5.684296  | -2.328058 | -0.734820 |
| H | 3.701168  | -3.528094 | 1.540640  |
| H | 3.740838  | -4.351294 | -0.027857 |
| C | -3.103891 | -0.398051 | -0.357798 |
| C | -4.015293 | -0.556012 | 0.689165  |
| C | -3.313476 | 0.470936  | -1.428743 |
| C | -5.183042 | 0.204000  | 0.640098  |
| C | -4.497968 | 1.204924  | -1.436596 |
| C | -5.437410 | 1.087870  | -0.410614 |
| H | -5.912585 | 0.099805  | 1.439415  |
| H | -4.686733 | 1.890540  | -2.258974 |
| C | -2.280418 | 0.610371  | -2.513260 |
| H | -2.038583 | -0.360742 | -2.955379 |
| H | -1.354394 | 1.027332  | -2.103395 |
| H | -2.635829 | 1.275291  | -3.301898 |
| C | -6.692102 | 1.922590  | -0.423660 |
| H | -6.518497 | 2.884395  | 0.069662  |
| H | -7.506487 | 1.421646  | 0.104413  |
| H | -7.017177 | 2.130564  | -1.445671 |
| C | -3.737865 | -1.523196 | 1.810668  |
| H | -2.806724 | -1.281537 | 2.336963  |
| H | -3.631164 | -2.540751 | 1.420922  |
| H | -4.556596 | -1.515690 | 2.532081  |
| H | 1.368523  | -4.167537 | 1.312319  |
| H | 3.694494  | 1.358539  | -1.734573 |

Vibrational frequencies

|           |          |          |
|-----------|----------|----------|
| -177.5581 | 24.3347  | 30.3115  |
| 32.1113   | 35.7009  | 41.8293  |
| 45.6930   | 53.2033  | 67.7489  |
| 77.7215   | 82.1265  | 86.5066  |
| 95.2920   | 122.2999 | 128.3205 |
| 134.0160  | 140.0275 | 152.4412 |
| 159.6679  | 166.7180 | 192.8680 |
| 201.1360  | 209.0920 | 231.4221 |
| 243.3921  | 250.7953 | 273.1313 |
| 283.8169  | 296.3660 | 298.9375 |
| 311.0808  | 326.7683 | 349.1531 |

|           |           |           |
|-----------|-----------|-----------|
| 360.5495  | 365.0726  | 390.8218  |
| 409.1860  | 416.6749  | 442.4194  |
| 445.8792  | 463.7402  | 483.5800  |
| 489.6400  | 494.1782  | 509.3613  |
| 518.1300  | 528.6001  | 551.2041  |
| 560.2573  | 579.2516  | 586.4739  |
| 590.9051  | 617.1251  | 628.6841  |
| 633.3047  | 645.0295  | 670.1467  |
| 675.6365  | 694.8811  | 713.3364  |
| 717.3069  | 727.6502  | 753.1852  |
| 758.1087  | 770.3036  | 784.2056  |
| 792.3696  | 808.1991  | 839.4686  |
| 863.5848  | 877.0980  | 878.5040  |
| 881.8677  | 901.6905  | 911.0052  |
| 920.5289  | 924.9314  | 954.5618  |
| 962.2389  | 967.0647  | 979.8347  |
| 985.6737  | 991.6979  | 1006.5859 |
| 1009.5845 | 1019.0000 | 1021.7947 |
| 1025.7085 | 1028.8730 | 1039.7932 |
| 1042.0708 | 1046.7504 | 1061.9371 |
| 1065.0468 | 1065.4800 | 1068.2885 |
| 1074.0623 | 1074.6950 | 1079.0175 |
| 1092.3188 | 1112.1100 | 1126.9741 |
| 1128.7116 | 1141.8560 | 1173.0836 |
| 1174.0675 | 1185.2750 | 1189.9875 |
| 1205.8698 | 1215.4268 | 1216.5817 |
| 1239.7150 | 1256.5649 | 1272.1473 |
| 1279.3001 | 1284.8704 | 1288.6374 |
| 1305.9099 | 1309.1518 | 1317.8598 |
| 1325.5301 | 1335.3115 | 1349.1545 |
| 1358.1089 | 1358.9302 | 1364.6599 |
| 1370.3073 | 1377.5009 | 1385.9776 |
| 1400.6280 | 1409.3717 | 1418.0746 |
| 1423.3987 | 1424.9020 | 1436.7150 |
| 1468.2287 | 1469.0246 | 1471.8975 |
| 1489.8142 | 1491.5990 | 1496.8414 |
| 1497.0104 | 1497.3746 | 1499.5871 |
| 1504.6387 | 1512.5097 | 1515.5595 |
| 1527.1075 | 1536.8609 | 1552.8241 |
| 1572.5924 | 1630.0675 | 1673.8218 |
| 1675.1292 | 1680.3710 | 1694.0618 |
| 1696.7880 | 1702.2389 | 1706.5958 |
| 1723.7484 | 2401.4017 | 2988.7737 |
| 3058.1516 | 3059.5179 | 3067.2939 |

|           |           |           |
|-----------|-----------|-----------|
| 3073.1741 | 3081.8217 | 3093.7617 |
| 3099.5698 | 3127.9485 | 3136.6632 |
| 3143.1740 | 3145.1585 | 3162.4235 |
| 3167.3248 | 3169.2268 | 3170.2764 |
| 3191.4311 | 3196.7234 | 3199.8945 |
| 3205.5666 | 3208.3983 | 3215.8164 |
| 3217.7068 | 3221.7807 | 3226.4814 |
| 3230.2408 | 3236.9017 | 3239.9035 |

### **Si-TS1**

Zero-point correction= 0.530358

Thermal correction to Energy= 0.561136

Thermal correction to Enthalpy= 0.562081

Thermal correction to Gibbs Free Energy= 0.469250

Sum of electronic and zero-point Energies= -1566.416486

Sum of electronic and thermal Energies= -1566.385707

Sum of electronic and thermal Enthalpies= -1566.384763

Sum of electronic and thermal Free Energies= -1566.477593

Cartesian coordinates

|   |           |           |           |
|---|-----------|-----------|-----------|
| C | -0.359732 | 0.411029  | -1.973616 |
| C | 1.108767  | 0.606137  | -1.721229 |
| C | 1.644557  | 1.618193  | -1.018141 |
| O | -0.733851 | -0.389366 | -2.854160 |
| C | 3.080993  | 1.742713  | -0.671839 |
| C | 3.465552  | 2.435168  | 0.481150  |
| C | 4.060442  | 1.113358  | -1.448214 |
| C | 4.800901  | 2.467148  | 0.871151  |
| H | 2.714010  | 2.934133  | 1.086918  |
| C | 5.393195  | 1.150739  | -1.058412 |
| H | 3.782390  | 0.601263  | -2.363922 |
| C | 5.767334  | 1.818090  | 0.107682  |
| H | 5.083735  | 2.999090  | 1.773703  |
| H | 6.144789  | 0.661199  | -1.669643 |
| H | 6.809265  | 1.841491  | 0.410563  |
| C | 0.752502  | 2.593619  | -0.437178 |
| N | 0.058078  | 3.378178  | 0.058585  |
| H | 1.753158  | -0.173118 | -2.121387 |
| H | -0.968792 | 1.301664  | -1.724714 |
| C | -0.781698 | -0.528775 | -0.231610 |
| C | -2.037703 | -2.110136 | 0.694647  |
| C | -3.239816 | -0.444934 | -0.729600 |
| H | -2.993183 | -0.320450 | -1.791432 |
| N | -0.826886 | -2.402241 | 1.066093  |
| N | -0.070954 | -1.409610 | 0.479501  |

|   |           |           |           |
|---|-----------|-----------|-----------|
| N | -2.047817 | -0.987989 | -0.088627 |
| C | -3.317652 | -2.839222 | 0.970252  |
| H | -3.350839 | -3.171612 | 2.008530  |
| H | -3.384002 | -3.719657 | 0.315214  |
| C | -4.431463 | -1.417874 | -0.551666 |
| O | -4.407725 | -1.968660 | 0.759620  |
| C | -5.151868 | 0.807316  | -0.088234 |
| C | -3.757615 | 0.837761  | -0.119692 |
| C | -3.044235 | 1.933472  | 0.343679  |
| C | -3.756954 | 3.026391  | 0.838097  |
| C | -5.151826 | 3.008885  | 0.862161  |
| C | -5.860340 | 1.897579  | 0.400994  |
| C | -5.663021 | -0.508991 | -0.629855 |
| H | -1.957896 | 1.941762  | 0.337762  |
| H | -5.692541 | 3.865392  | 1.252377  |
| H | -6.945615 | 1.882902  | 0.436667  |
| H | -5.989724 | -0.407865 | -1.670639 |
| H | -6.488808 | -0.933858 | -0.054338 |
| C | 1.361053  | -1.473713 | 0.572066  |
| C | 2.029134  | -2.312739 | -0.326403 |
| C | 2.023306  | -0.691562 | 1.515392  |
| C | 3.417319  | -2.370318 | -0.239682 |
| C | 3.415287  | -0.790913 | 1.571670  |
| C | 4.124183  | -1.624859 | 0.710067  |
| H | 3.962446  | -3.010325 | -0.929866 |
| H | 3.956295  | -0.184572 | 2.293771  |
| C | 1.260300  | 0.249836  | 2.407115  |
| H | 0.448840  | -0.266946 | 2.928010  |
| H | 0.804463  | 1.056500  | 1.820400  |
| H | 1.922238  | 0.700529  | 3.148692  |
| C | 5.623637  | -1.739047 | 0.798348  |
| H | 6.041089  | -0.963542 | 1.443979  |
| H | 6.080784  | -1.642531 | -0.190295 |
| H | 5.913878  | -2.714323 | 1.202369  |
| C | 1.256585  | -3.080999 | -1.366816 |
| H | 0.663426  | -2.402525 | -1.993636 |
| H | 0.558491  | -3.781098 | -0.897678 |
| H | 1.933810  | -3.646326 | -2.009132 |
| H | -4.424775 | -2.224623 | -1.295665 |
| H | -3.218004 | 3.893171  | 1.207140  |

Vibrational frequencies

|           |         |         |
|-----------|---------|---------|
| -180.0952 | 23.4475 | 28.4568 |
| 39.6444   | 43.3399 | 57.4008 |
| 68.8466   | 75.4935 | 79.7448 |

|           |           |           |
|-----------|-----------|-----------|
| 86.0809   | 87.2588   | 112.6214  |
| 126.4364  | 131.9189  | 149.9324  |
| 159.3547  | 164.4761  | 187.0830  |
| 201.5421  | 206.9547  | 216.4741  |
| 221.2532  | 226.1462  | 233.0073  |
| 252.2737  | 260.4002  | 277.1220  |
| 282.8021  | 300.1225  | 303.5000  |
| 313.9112  | 325.4860  | 345.7600  |
| 363.0625  | 368.3978  | 386.6377  |
| 407.0456  | 411.8838  | 441.7384  |
| 461.1198  | 462.1232  | 481.0770  |
| 492.6055  | 497.4904  | 508.2839  |
| 518.3888  | 531.7419  | 538.3318  |
| 557.8064  | 585.4039  | 588.4674  |
| 589.5112  | 614.5529  | 626.5262  |
| 632.1799  | 642.5293  | 668.3150  |
| 675.2144  | 701.6789  | 709.7382  |
| 726.7716  | 729.6613  | 752.8270  |
| 757.6031  | 766.1497  | 787.2772  |
| 791.3366  | 806.7344  | 841.0010  |
| 860.1765  | 867.5537  | 881.3708  |
| 884.3238  | 901.0331  | 908.9499  |
| 916.4812  | 921.0822  | 947.2235  |
| 961.0394  | 965.3703  | 982.0734  |
| 983.9593  | 990.5949  | 998.5832  |
| 1007.8208 | 1017.8044 | 1019.5813 |
| 1025.7782 | 1026.6061 | 1035.4845 |
| 1042.7468 | 1048.5044 | 1060.2899 |
| 1064.6243 | 1065.0453 | 1070.6794 |
| 1073.2872 | 1073.8668 | 1077.3833 |
| 1082.0339 | 1115.3506 | 1119.7504 |
| 1124.3076 | 1139.4255 | 1172.8134 |
| 1174.7635 | 1180.6114 | 1190.3433 |
| 1199.4371 | 1213.7037 | 1216.4857 |
| 1239.5366 | 1253.8922 | 1269.7358 |
| 1273.1008 | 1280.4346 | 1286.9146 |
| 1303.5369 | 1307.9597 | 1316.7135 |
| 1322.6881 | 1334.4240 | 1338.5173 |
| 1354.2598 | 1363.7524 | 1366.2567 |
| 1366.6723 | 1378.2509 | 1387.2151 |
| 1399.3437 | 1411.6924 | 1420.9483 |
| 1424.0450 | 1425.8000 | 1436.4307 |
| 1466.8563 | 1470.8511 | 1474.3584 |
| 1490.2531 | 1492.4762 | 1493.2329 |

|           |           |           |
|-----------|-----------|-----------|
| 1495.1486 | 1499.2054 | 1499.7577 |
| 1506.1641 | 1514.7907 | 1517.9097 |
| 1528.6920 | 1538.0453 | 1551.6943 |
| 1567.6217 | 1628.6538 | 1671.5600 |
| 1678.6272 | 1685.3381 | 1693.0317 |
| 1693.5674 | 1698.1351 | 1706.5026 |
| 1721.9767 | 2394.3302 | 2972.9097 |
| 3053.8977 | 3058.6132 | 3067.3938 |
| 3070.5461 | 3082.2369 | 3092.7486 |
| 3099.1176 | 3126.9792 | 3138.9260 |
| 3140.5961 | 3147.2830 | 3164.5356 |
| 3167.0354 | 3173.1860 | 3174.5628 |
| 3187.4816 | 3195.7085 | 3198.2313 |
| 3200.5922 | 3202.9148 | 3207.6179 |
| 3208.0474 | 3213.4399 | 3217.9821 |
| 3220.9075 | 3222.4812 | 3235.4716 |

### **Re-M1**

Zero-point correction= 0.531745

Thermal correction to Energy= 0.563117

Thermal correction to Enthalpy= 0.564062

Thermal correction to Gibbs Free Energy= 0.468916

Sum of electronic and zero-point Energies= -1566.418795

Sum of electronic and thermal Energies= -1566.387423

Sum of electronic and thermal Enthalpies= -1566.386479

Sum of electronic and thermal Free Energies= -1566.481625

Cartesian coordinates

|   |           |           |           |
|---|-----------|-----------|-----------|
| C | -0.640788 | 0.048267  | 1.659346  |
| C | 0.498716  | 1.030314  | 1.413149  |
| C | 0.419884  | 2.219754  | 0.792156  |
| O | -0.455988 | -0.744134 | 2.708637  |
| C | 1.586528  | 3.092645  | 0.501583  |
| C | 1.581882  | 3.915441  | -0.630211 |
| C | 2.725572  | 3.060361  | 1.314649  |
| C | 2.701469  | 4.676668  | -0.953303 |
| H | 0.700785  | 3.952460  | -1.264581 |
| C | 3.841463  | 3.823329  | 0.990138  |
| H | 2.732069  | 2.451552  | 2.213235  |
| C | 3.835386  | 4.630888  | -0.146482 |
| H | 2.685735  | 5.305551  | -1.837332 |
| H | 4.715937  | 3.793793  | 1.631764  |
| H | 4.706960  | 5.226672  | -0.396592 |
| C | -0.854963 | 2.643510  | 0.262056  |
| N | -1.862435 | 3.007537  | -0.181230 |

|   |           |           |           |
|---|-----------|-----------|-----------|
| H | 1.465150  | 0.693390  | 1.784847  |
| H | -1.591772 | 0.632616  | 1.626099  |
| C | -0.760356 | -0.886797 | 0.418765  |
| C | -0.481727 | -2.709562 | -0.767316 |
| C | 1.464200  | -2.050578 | 0.654143  |
| H | 1.367229  | -1.773507 | 1.712976  |
| N | -1.702392 | -2.334843 | -1.018435 |
| N | -1.853581 | -1.192776 | -0.274624 |
| N | 0.135271  | -1.837901 | 0.086329  |
| C | 0.204997  | -3.982583 | -1.168638 |
| H | 0.109974  | -4.146825 | -2.243011 |
| H | -0.283142 | -4.814358 | -0.641725 |
| C | 1.857690  | -3.533433 | 0.478165  |
| O | 1.578455  | -3.921177 | -0.863876 |
| C | 3.738308  | -2.170828 | 0.008361  |
| C | 2.614090  | -1.341047 | -0.037070 |
| C | 2.672945  | -0.092242 | -0.639198 |
| C | 3.895833  | 0.349537  | -1.148656 |
| C | 5.027857  | -0.459380 | -1.069204 |
| C | 4.953129  | -1.733136 | -0.500759 |
| C | 3.380989  | -3.509178 | 0.616675  |
| H | 1.790456  | 0.531991  | -0.729214 |
| H | 5.971798  | -0.104346 | -1.470117 |
| H | 5.827832  | -2.375965 | -0.473434 |
| H | 3.660679  | -3.558698 | 1.674803  |
| H | 3.833296  | -4.359351 | 0.102308  |
| C | -3.104246 | -0.484538 | -0.277557 |
| C | -3.981298 | -0.688022 | 0.789336  |
| C | -3.377257 | 0.361226  | -1.354421 |
| C | -5.185926 | 0.013657  | 0.757577  |
| C | -4.597210 | 1.030976  | -1.342440 |
| C | -5.506688 | 0.874889  | -0.293581 |
| H | -5.891517 | -0.119068 | 1.572535  |
| H | -4.838363 | 1.698383  | -2.166108 |
| C | -2.382410 | 0.532696  | -2.469658 |
| H | -2.230460 | -0.406591 | -3.009807 |
| H | -1.411068 | 0.850366  | -2.077764 |
| H | -2.726452 | 1.289951  | -3.175462 |
| C | -6.800140 | 1.647188  | -0.290321 |
| H | -6.625265 | 2.682957  | 0.025353  |
| H | -7.525140 | 1.204645  | 0.398732  |
| H | -7.242550 | 1.678764  | -1.290695 |
| C | -3.636851 | -1.637885 | 1.906842  |
| H | -2.681456 | -1.382764 | 2.385347  |

|   |           |           |           |
|---|-----------|-----------|-----------|
| H | -3.544479 | -2.659318 | 1.521404  |
| H | -4.422901 | -1.630766 | 2.663636  |
| H | 1.344327  | -4.196924 | 1.184862  |
| H | 3.958102  | 1.330943  | -1.609236 |

Vibrational frequencies

|           |           |           |
|-----------|-----------|-----------|
| 25.3436   | 28.7207   | 31.9521   |
| 39.7703   | 43.7602   | 48.6868   |
| 69.1766   | 74.9120   | 87.9200   |
| 97.6198   | 106.5530  | 109.6383  |
| 120.0834  | 141.0392  | 149.1264  |
| 152.3287  | 155.5823  | 163.3943  |
| 172.6763  | 195.7605  | 201.6969  |
| 213.4983  | 231.1667  | 241.2240  |
| 252.3798  | 277.9576  | 283.4572  |
| 288.1327  | 296.4824  | 308.2707  |
| 330.2545  | 333.7025  | 360.2037  |
| 374.3463  | 376.4567  | 411.8529  |
| 413.3025  | 443.6960  | 450.9108  |
| 459.3498  | 476.9902  | 488.6236  |
| 499.4350  | 508.6684  | 521.6272  |
| 528.5905  | 533.6359  | 559.1886  |
| 582.7585  | 586.2255  | 590.6471  |
| 608.0064  | 628.6111  | 638.1460  |
| 642.2794  | 660.5201  | 674.0238  |
| 700.5727  | 711.5077  | 717.9059  |
| 729.5427  | 748.3863  | 755.4514  |
| 766.3962  | 772.5832  | 786.8034  |
| 799.4683  | 818.6574  | 842.0513  |
| 876.7306  | 879.8710  | 884.1180  |
| 886.2943  | 902.1974  | 912.2400  |
| 922.3922  | 952.0307  | 962.8724  |
| 965.6650  | 970.4304  | 979.9115  |
| 985.3586  | 988.7197  | 1011.4779 |
| 1016.3615 | 1018.0522 | 1023.9710 |
| 1035.7268 | 1039.3719 | 1043.8328 |
| 1046.8256 | 1057.0891 | 1059.3799 |
| 1066.3780 | 1068.5762 | 1070.3627 |
| 1074.3175 | 1075.9680 | 1078.8597 |
| 1104.5400 | 1113.9336 | 1129.0249 |
| 1138.8716 | 1178.1935 | 1179.4431 |
| 1186.5010 | 1188.8435 | 1203.2367 |
| 1211.1460 | 1219.2166 | 1224.0995 |
| 1238.9354 | 1256.3343 | 1269.4495 |
| 1281.6140 | 1285.4811 | 1287.0658 |



|           |           |           |
|-----------|-----------|-----------|
| 1303.9038 | 1314.8938 | 1318.9321 |
| 1326.7386 | 1330.3891 | 1341.2837 |
| 1348.6834 | 1354.4945 | 1363.9543 |
| 1371.4466 | 1375.0389 | 1378.9604 |
| 1381.0973 | 1397.3989 | 1408.7138 |
| 1421.1443 | 1427.0956 | 1437.8136 |
| 1465.4011 | 1468.2128 | 1473.8007 |
| 1484.5484 | 1487.9015 | 1495.5253 |
| 1497.6893 | 1498.7552 | 1504.4087 |
| 1510.9371 | 1517.3811 | 1521.6066 |
| 1527.4522 | 1531.3630 | 1544.5464 |
| 1554.5226 | 1582.2730 | 1670.8992 |
| 1672.2211 | 1681.4979 | 1691.7423 |
| 1694.6959 | 1700.9389 | 1703.0473 |
| 1709.4144 | 2399.4943 | 2869.3948 |
| 3035.8961 | 3055.1068 | 3062.5021 |
| 3069.1232 | 3089.5716 | 3091.6742 |
| 3107.5806 | 3111.1687 | 3125.1496 |
| 3137.2378 | 3152.2760 | 3156.0221 |
| 3159.4496 | 3167.9106 | 3173.6774 |
| 3193.1406 | 3203.1857 | 3208.1013 |
| 3209.2565 | 3216.8123 | 3220.0698 |
| 3223.5583 | 3231.2315 | 3232.5229 |
| 3237.8399 | 3238.7599 | 3247.6734 |

### **Si-M1**

Zero-point correction= 0.531313

Thermal correction to Energy= 0.562773

Thermal correction to Enthalpy= 0.563717

Thermal correction to Gibbs Free Energy= 0.467671

Sum of electronic and zero-point Energies= -1566.422965

Sum of electronic and thermal Energies= -1566.391504

Sum of electronic and thermal Enthalpies= -1566.390560

Sum of electronic and thermal Free Energies= -1566.486606

Cartesian coordinates

|   |           |           |           |
|---|-----------|-----------|-----------|
| C | -0.318843 | 0.341236  | -1.463960 |
| C | 1.159796  | 0.686187  | -1.322686 |
| C | 1.684172  | 1.694175  | -0.603789 |
| O | -0.633954 | -0.277770 | -2.597344 |
| C | 3.133353  | 2.000687  | -0.488704 |
| C | 3.564231  | 3.275716  | -0.108192 |
| C | 4.087705  | 1.011318  | -0.752750 |
| C | 4.922794  | 3.561493  | -0.010263 |
| H | 2.832788  | 4.049517  | 0.107631  |

|   |           |           |           |
|---|-----------|-----------|-----------|
| C | 5.443789  | 1.300413  | -0.657640 |
| H | 3.768832  | 0.005198  | -1.006932 |
| C | 5.866834  | 2.576495  | -0.287053 |
| H | 5.241752  | 4.556360  | 0.282553  |
| H | 6.172785  | 0.522739  | -0.863735 |
| H | 6.926075  | 2.798030  | -0.207603 |
| C | 0.791729  | 2.541470  | 0.152437  |
| N | 0.099163  | 3.229905  | 0.777342  |
| H | 1.818076  | 0.062216  | -1.923609 |
| H | -0.885561 | 1.280576  | -1.244764 |
| C | -0.755060 | -0.624875 | -0.327498 |
| C | -2.099076 | -2.057514 | 0.646141  |
| C | -3.207090 | -0.338857 | -0.800223 |
| H | -2.888747 | -0.175969 | -1.838150 |
| N | -0.903565 | -2.448010 | 0.977714  |
| N | -0.077586 | -1.538011 | 0.364834  |
| N | -2.050963 | -0.937952 | -0.135185 |
| C | -3.415674 | -2.723848 | 0.916320  |
| H | -3.497931 | -2.993591 | 1.970121  |
| H | -3.473323 | -3.639869 | 0.311746  |
| C | -4.406546 | -1.310190 | -0.707481 |
| O | -4.470927 | -1.842726 | 0.612020  |
| C | -5.148645 | 0.895264  | -0.234680 |
| C | -3.754794 | 0.915755  | -0.154474 |
| C | -3.081250 | 1.975856  | 0.433797  |
| C | -3.829492 | 3.044582  | 0.929601  |
| C | -5.220577 | 3.040877  | 0.832196  |
| C | -5.891522 | 1.962002  | 0.252811  |
| C | -5.621753 | -0.393806 | -0.868302 |
| H | -1.999726 | 1.980875  | 0.529795  |
| H | -5.788699 | 3.878988  | 1.223151  |
| H | -6.976033 | 1.951642  | 0.198960  |
| H | -5.848365 | -0.255776 | -1.931169 |
| H | -6.499284 | -0.828164 | -0.384030 |
| C | 1.346261  | -1.728246 | 0.444514  |
| C | 1.954165  | -2.492301 | -0.552573 |
| C | 2.037675  | -1.169377 | 1.521046  |
| C | 3.329910  | -2.702181 | -0.439490 |
| C | 3.407551  | -1.408743 | 1.589085  |
| C | 4.065608  | -2.176444 | 0.623961  |
| H | 3.835447  | -3.287514 | -1.203270 |
| H | 3.976921  | -0.976258 | 2.408120  |
| C | 1.319187  | -0.332733 | 2.543445  |
| H | 0.526082  | -0.906395 | 3.032620  |

|   |           |           |           |
|---|-----------|-----------|-----------|
| H | 0.847988  | 0.538836  | 2.075542  |
| H | 2.012233  | 0.023984  | 3.306277  |
| C | 5.548414  | -2.417082 | 0.733883  |
| H | 6.067896  | -1.504924 | 1.039545  |
| H | 5.967308  | -2.754529 | -0.216361 |
| H | 5.760698  | -3.183337 | 1.486290  |
| C | 1.145047  | -3.037648 | -1.698975 |
| H | 0.610244  | -2.231375 | -2.219908 |
| H | 0.394091  | -3.746178 | -1.332944 |
| H | 1.790088  | -3.558789 | -2.408117 |
| H | -4.349690 | -2.122478 | -1.442463 |
| H | -3.319643 | 3.880546  | 1.397349  |

Vibrational frequencies

|           |           |           |
|-----------|-----------|-----------|
| 18.0914   | 24.8176   | 28.2915   |
| 36.2257   | 45.1275   | 52.5781   |
| 61.8812   | 70.0869   | 81.2274   |
| 89.9329   | 99.3762   | 107.7258  |
| 114.4432  | 134.3997  | 147.5445  |
| 148.4065  | 153.3648  | 167.2135  |
| 192.5221  | 198.8824  | 208.1161  |
| 213.7465  | 239.2851  | 244.4250  |
| 249.8856  | 274.6070  | 281.2222  |
| 290.8520  | 306.3610  | 307.4484  |
| 326.1564  | 335.3622  | 352.6057  |
| 375.3831  | 392.4717  | 406.7412  |
| 420.3761  | 425.6776  | 440.3706  |
| 461.3603  | 482.8668  | 494.7534  |
| 501.6454  | 502.2419  | 514.4564  |
| 527.4541  | 546.1285  | 556.9503  |
| 574.2711  | 585.1925  | 588.9975  |
| 617.1717  | 627.0562  | 629.3184  |
| 643.8625  | 656.4590  | 676.2246  |
| 691.6208  | 703.7010  | 718.0337  |
| 728.8293  | 750.2121  | 758.9645  |
| 766.5842  | 774.5337  | 794.4183  |
| 801.2995  | 812.1247  | 840.1403  |
| 868.6506  | 879.2107  | 882.3682  |
| 884.7881  | 902.6002  | 912.4258  |
| 922.8830  | 940.9705  | 960.5200  |
| 962.8485  | 966.3880  | 977.3627  |
| 984.2245  | 988.8789  | 1011.1618 |
| 1018.7308 | 1020.1128 | 1022.4550 |
| 1031.9603 | 1037.6428 | 1041.1492 |
| 1044.9218 | 1053.6939 | 1057.1887 |

|           |           |           |
|-----------|-----------|-----------|
| 1064.3575 | 1066.9675 | 1074.4701 |
| 1075.4323 | 1078.3126 | 1082.1319 |
| 1116.8458 | 1118.5123 | 1127.5415 |
| 1128.9887 | 1175.2049 | 1181.1948 |
| 1181.4355 | 1191.0347 | 1200.0959 |
| 1213.6452 | 1216.0181 | 1219.7434 |
| 1238.2917 | 1253.7554 | 1270.4567 |
| 1279.3962 | 1280.1880 | 1285.5634 |
| 1302.9762 | 1318.6401 | 1320.9450 |
| 1323.9471 | 1329.3862 | 1339.9442 |
| 1343.2221 | 1353.0721 | 1363.4899 |
| 1369.4781 | 1373.6944 | 1379.4960 |
| 1383.2823 | 1392.3609 | 1408.8468 |
| 1416.4658 | 1423.3190 | 1438.5111 |
| 1464.9491 | 1467.4728 | 1472.8092 |
| 1483.0762 | 1488.2909 | 1491.6065 |
| 1493.2086 | 1498.3008 | 1502.1346 |
| 1512.5474 | 1518.1395 | 1520.9654 |
| 1526.7420 | 1535.7128 | 1546.2698 |
| 1553.8234 | 1588.0938 | 1670.7844 |
| 1676.7182 | 1683.8456 | 1687.6982 |
| 1694.8359 | 1697.4261 | 1706.5249 |
| 1710.0208 | 2396.5178 | 2850.2387 |
| 3038.2852 | 3065.2676 | 3066.0038 |
| 3070.3606 | 3084.8421 | 3100.3784 |
| 3105.1628 | 3117.9142 | 3133.3807 |
| 3140.5694 | 3147.5923 | 3162.7878 |
| 3167.3105 | 3169.3368 | 3176.3684 |
| 3194.9400 | 3198.9254 | 3200.7409 |
| 3203.0636 | 3208.5035 | 3214.0481 |
| 3215.0541 | 3219.6143 | 3224.5619 |
| 3226.2114 | 3230.8359 | 3234.6745 |

**Re-TS1(L2)**

Zero-point correction= 0.524566

Thermal correction to Energy= 0.556273

Thermal correction to Enthalpy= 0.557217

Thermal correction to Gibbs Free Energy= 0.460476

Sum of electronic and zero-point Energies= -1567.141522

Sum of electronic and thermal Energies= -1567.109815

Sum of electronic and thermal Enthalpies= -1567.108871

Sum of electronic and thermal Free Energies= -1567.205612

Cartesian coordinates

|   |          |          |          |
|---|----------|----------|----------|
| C | 0.303219 | 0.472397 | 1.832628 |
|---|----------|----------|----------|

|   |           |           |           |
|---|-----------|-----------|-----------|
| C | -1.174053 | 0.646296  | 1.608253  |
| C | -1.763567 | 1.589125  | 0.840295  |
| O | 0.684357  | -0.249035 | 2.797810  |
| C | -3.229347 | 1.730855  | 0.647278  |
| C | -3.739120 | 2.319056  | -0.521545 |
| C | -4.132616 | 1.252206  | 1.610722  |
| C | -5.114402 | 2.406993  | -0.731407 |
| H | -3.056600 | 2.695340  | -1.277100 |
| C | -5.506364 | 1.341498  | 1.399016  |
| H | -3.762127 | 0.825528  | 2.536781  |
| C | -6.004237 | 1.917116  | 0.226330  |
| H | -5.489357 | 2.857776  | -1.645134 |
| H | -6.189941 | 0.969821  | 2.156208  |
| H | -7.075484 | 1.988980  | 0.065499  |
| C | -0.923516 | 2.471103  | 0.076871  |
| N | -0.265761 | 3.181718  | -0.570253 |
| H | -1.793444 | -0.071603 | 2.135047  |
| H | 0.883474  | 1.373306  | 1.553587  |
| C | 0.818052  | -0.548951 | 0.219890  |
| C | 2.172112  | -2.130554 | -0.567020 |
| C | 3.260979  | -0.325955 | 0.793717  |
| H | 2.961455  | -0.149331 | 1.833689  |
| N | 0.984166  | -2.503855 | -0.957593 |
| N | 0.159964  | -1.500681 | -0.452401 |
| N | 2.111246  | -0.956404 | 0.143263  |
| C | 3.485228  | -2.831530 | -0.747087 |
| H | 3.575976  | -3.221465 | -1.762900 |
| H | 3.542942  | -3.678280 | -0.045327 |
| C | 4.496861  | -1.266986 | 0.733928  |
| O | 4.553487  | -1.920060 | -0.540607 |
| C | 5.160946  | 0.957204  | 0.157095  |
| C | 3.762196  | 0.939609  | 0.130059  |
| C | 3.034284  | 1.986873  | -0.423919 |
| C | 3.733489  | 3.076602  | -0.953736 |
| C | 5.131711  | 3.106446  | -0.920644 |
| C | 5.855763  | 2.044777  | -0.365418 |
| C | 5.695018  | -0.306589 | 0.795483  |
| H | 1.950749  | 1.960450  | -0.463423 |
| H | 5.661768  | 3.957647  | -1.337829 |
| H | 6.941861  | 2.064821  | -0.354970 |
| H | 5.981795  | -0.133987 | 1.840003  |
| H | 6.558568  | -0.734844 | 0.279511  |
| C | -1.263960 | -1.601685 | -0.602696 |
| C | -1.973575 | -2.334600 | 0.357562  |

|   |           |           |           |
|---|-----------|-----------|-----------|
| C | -1.883076 | -0.940171 | -1.669864 |
| C | -3.364429 | -2.388269 | 0.225885  |
| C | -3.274041 | -1.029365 | -1.761154 |
| C | -4.029377 | -1.740777 | -0.821881 |
| H | -3.940489 | -2.944300 | 0.960918  |
| H | -3.781098 | -0.517460 | -2.574458 |
| C | -1.071836 | -0.141016 | -2.658318 |
| H | -0.261226 | -0.741281 | -3.083686 |
| H | -0.608703 | 0.725790  | -2.174901 |
| H | -1.699044 | 0.222508  | -3.475165 |
| C | -5.535253 | -1.770338 | -0.916925 |
| H | -5.960097 | -0.873244 | -0.452936 |
| H | -5.953617 | -2.641228 | -0.404639 |
| H | -5.869148 | -1.789612 | -1.958695 |
| C | -1.251273 | -3.011722 | 1.496785  |
| H | -0.679437 | -2.289250 | 2.092148  |
| H | -0.535908 | -3.750475 | 1.119826  |
| H | -1.956577 | -3.522981 | 2.155838  |
| H | 4.486130  | -2.014849 | 1.537224  |
| H | 3.182627  | 3.901647  | -1.394966 |

Vibrational frequencies

|           |          |          |
|-----------|----------|----------|
| -225.0420 | 18.7142  | 23.2595  |
| 35.1993   | 40.4452  | 43.3250  |
| 57.4590   | 62.1152  | 74.0125  |
| 76.6526   | 81.3431  | 85.6795  |
| 89.1795   | 98.3697  | 120.7299 |
| 127.6633  | 144.1214 | 145.7762 |
| 158.0376  | 182.6776 | 199.5696 |
| 205.0604  | 213.9317 | 225.4470 |
| 237.9866  | 245.0100 | 267.5117 |
| 285.7723  | 289.5143 | 298.0202 |
| 314.4937  | 326.5563 | 345.5760 |
| 360.8718  | 367.0686 | 387.3447 |
| 403.4258  | 414.5296 | 440.8264 |
| 457.8674  | 461.7662 | 479.5829 |
| 492.0172  | 496.3444 | 511.5751 |
| 516.6344  | 530.8157 | 541.5817 |
| 557.9444  | 580.2018 | 586.6536 |
| 590.6410  | 608.0085 | 629.2276 |
| 631.7008  | 639.5398 | 663.6755 |
| 673.9410  | 688.3572 | 706.3994 |
| 720.3546  | 722.0221 | 745.1956 |
| 753.2497  | 760.7184 | 778.2963 |
| 784.4204  | 804.1978 | 831.8104 |

|           |           |           |
|-----------|-----------|-----------|
| 848.0356  | 856.3286  | 869.5973  |
| 872.1766  | 889.8735  | 899.1307  |
| 909.4256  | 917.4395  | 936.3887  |
| 951.8459  | 959.9295  | 967.3303  |
| 972.8680  | 976.8665  | 979.1990  |
| 982.6242  | 1001.3497 | 1004.3723 |
| 1010.8141 | 1013.9429 | 1035.3666 |
| 1042.0117 | 1043.7207 | 1047.2734 |
| 1052.5476 | 1059.6571 | 1064.8868 |
| 1065.9743 | 1068.6439 | 1070.2922 |
| 1080.0058 | 1107.7208 | 1112.4105 |
| 1119.8365 | 1124.2834 | 1132.1810 |
| 1184.7804 | 1189.6681 | 1191.0422 |
| 1194.9206 | 1202.4186 | 1221.1371 |
| 1223.3220 | 1245.4109 | 1263.7702 |
| 1266.8505 | 1272.7589 | 1279.9341 |
| 1293.4980 | 1303.5899 | 1315.2536 |
| 1319.7721 | 1330.5186 | 1333.6475 |
| 1343.5790 | 1353.6216 | 1355.7906 |
| 1370.6088 | 1372.7751 | 1376.1358 |
| 1384.4104 | 1396.7270 | 1404.1064 |
| 1422.0273 | 1429.3795 | 1438.2212 |
| 1447.4307 | 1454.4490 | 1462.1524 |
| 1475.9322 | 1487.1835 | 1489.3304 |
| 1490.0850 | 1494.0216 | 1495.8132 |
| 1499.5197 | 1501.1671 | 1505.5831 |
| 1517.1556 | 1520.6563 | 1535.7965 |
| 1540.4320 | 1546.2620 | 1622.9961 |
| 1628.8727 | 1642.2524 | 1643.3207 |
| 1653.7765 | 1657.4102 | 1662.9335 |
| 1663.5824 | 2325.4050 | 2913.0604 |
| 3002.3579 | 3032.1041 | 3043.1979 |
| 3045.4113 | 3048.5288 | 3054.8189 |
| 3061.4608 | 3095.1770 | 3108.8248 |
| 3111.0095 | 3113.3984 | 3126.3261 |
| 3128.6788 | 3134.4754 | 3138.5736 |
| 3178.9031 | 3181.4602 | 3181.5091 |
| 3184.6739 | 3191.5890 | 3192.5913 |
| 3199.6954 | 3204.6926 | 3206.4003 |
| 3213.1956 | 3217.8755 | 3220.1386 |

***Si*-TS1(L2)**

Zero-point correction= 0.524297

Thermal correction to Energy= 0.556146

Thermal correction to Enthalpy= 0.557090  
Thermal correction to Gibbs Free Energy= 0.459319  
Sum of electronic and zero-point Energies= -1567.137172  
Sum of electronic and thermal Energies= -1567.105323  
Sum of electronic and thermal Enthalpies= -1567.104379  
Sum of electronic and thermal Free Energies= -1567.202150

Cartesian coordinates

|   |           |           |           |
|---|-----------|-----------|-----------|
| C | -0.655619 | 0.292191  | 1.909202  |
| C | 0.554108  | 1.122849  | 1.592536  |
| C | 0.583279  | 2.292314  | 0.915790  |
| O | -0.572315 | -0.552141 | 2.844504  |
| C | 1.836634  | 3.013210  | 0.571228  |
| C | 1.934198  | 3.726985  | -0.634480 |
| C | 2.964453  | 2.935438  | 1.404645  |
| C | 3.138421  | 4.321746  | -1.010556 |
| H | 1.069852  | 3.802863  | -1.287289 |
| C | 4.165203  | 3.531592  | 1.026757  |
| H | 2.897951  | 2.417976  | 2.356184  |
| C | 4.259651  | 4.222245  | -0.184483 |
| H | 3.198796  | 4.861744  | -1.950516 |
| H | 5.027115  | 3.462518  | 1.683314  |
| H | 5.196483  | 4.686547  | -0.476562 |
| C | -0.639704 | 2.820974  | 0.376728  |
| N | -1.607839 | 3.270121  | -0.088775 |
| H | 1.489901  | 0.699965  | 1.945373  |
| H | -1.609732 | 0.816885  | 1.710131  |
| C | -0.785296 | -0.795782 | 0.258931  |
| C | -0.696317 | -2.848803 | -0.598451 |
| C | 1.348907  | -2.084232 | 0.627577  |
| H | 1.304524  | -1.749745 | 1.671295  |
| N | -1.900591 | -2.434389 | -0.884139 |
| N | -1.927015 | -1.152313 | -0.338856 |
| N | 0.007180  | -1.885707 | 0.084562  |
| C | -0.084520 | -4.196374 | -0.845743 |
| H | -0.292353 | -4.532428 | -1.863704 |
| H | -0.525727 | -4.922873 | -0.145665 |
| C | 1.738188  | -3.585428 | 0.561862  |
| O | 1.326124  | -4.133380 | -0.696932 |
| C | 3.600347  | -2.248955 | -0.116256 |
| C | 2.478129  | -1.412149 | -0.128702 |
| C | 2.517567  | -0.164348 | -0.740627 |
| C | 3.719329  | 0.265736  | -1.313131 |
| C | 4.850761  | -0.555298 | -1.280081 |
| C | 4.795742  | -1.823566 | -0.688935 |



|   |           |           |           |
|---|-----------|-----------|-----------|
| C | 3.274554  | -3.562822 | 0.561554  |
| H | 1.636071  | 0.463591  | -0.779169 |
| H | 5.778554  | -0.211326 | -1.727690 |
| H | 5.669921  | -2.468461 | -0.687237 |
| H | 3.647297  | -3.584929 | 1.592871  |
| H | 3.674429  | -4.438624 | 0.043518  |
| C | -3.138009 | -0.382032 | -0.365515 |
| C | -4.058930 | -0.569188 | 0.675860  |
| C | -3.343545 | 0.523476  | -1.412764 |
| C | -5.226817 | 0.197042  | 0.644418  |
| C | -4.529208 | 1.263259  | -1.400281 |
| C | -5.476295 | 1.117843  | -0.380685 |
| H | -5.958046 | 0.071758  | 1.438827  |
| H | -4.712389 | 1.973476  | -2.202200 |
| C | -2.308254 | 0.703186  | -2.493549 |
| H | -1.998706 | -0.258281 | -2.914819 |
| H | -1.413981 | 1.188141  | -2.088055 |
| H | -2.692407 | 1.328480  | -3.302445 |
| C | -6.729138 | 1.960292  | -0.367766 |
| H | -6.567279 | 2.884679  | 0.199797  |
| H | -7.562927 | 1.430917  | 0.102463  |
| H | -7.029764 | 2.246980  | -1.379467 |
| C | -3.786555 | -1.561418 | 1.780358  |
| H | -2.860904 | -1.322807 | 2.317967  |
| H | -3.667376 | -2.571420 | 1.373029  |
| H | -4.609829 | -1.577271 | 2.498041  |
| H | 1.301447  | -4.164426 | 1.385576  |
| H | 3.768885  | 1.246384  | -1.776349 |

Vibrational frequencies

|           |          |          |
|-----------|----------|----------|
| -226.6613 | 21.5780  | 25.5933  |
| 27.7148   | 36.0768  | 38.9500  |
| 42.1139   | 49.4373  | 64.2904  |
| 70.1537   | 78.6815  | 84.3567  |
| 88.7205   | 114.4622 | 118.7297 |
| 124.4324  | 138.6960 | 151.0869 |
| 160.1089  | 184.7602 | 195.0673 |
| 198.7072  | 206.5703 | 227.9196 |
| 238.2930  | 246.1218 | 269.2890 |
| 285.4087  | 289.2406 | 294.3671 |
| 313.3636  | 327.9786 | 348.2891 |
| 360.1619  | 365.8668 | 389.1338 |
| 405.5376  | 415.5824 | 438.0674 |
| 443.7596  | 463.8357 | 478.6721 |
| 487.3810  | 494.2773 | 512.1063 |

|           |           |           |
|-----------|-----------|-----------|
| 517.5986  | 528.0940  | 545.4436  |
| 558.4264  | 579.6043  | 580.3178  |
| 586.9403  | 614.1597  | 630.7001  |
| 631.6329  | 639.4366  | 665.7336  |
| 672.8513  | 684.7451  | 705.5550  |
| 710.0286  | 721.2892  | 743.3199  |
| 751.3271  | 760.1901  | 776.5809  |
| 781.1061  | 804.7931  | 830.0564  |
| 850.0190  | 860.7756  | 870.0089  |
| 873.6123  | 889.8911  | 901.4654  |
| 908.4827  | 919.2228  | 940.2383  |
| 950.9733  | 960.2129  | 969.5910  |
| 973.8928  | 975.6005  | 981.6253  |
| 983.4532  | 998.6329  | 1006.3931 |
| 1010.4803 | 1013.5464 | 1034.1537 |
| 1042.2013 | 1043.6340 | 1045.1099 |
| 1051.2379 | 1059.9239 | 1062.4234 |
| 1065.3181 | 1066.6143 | 1070.5966 |
| 1079.1674 | 1105.2898 | 1114.4740 |
| 1118.4944 | 1126.0670 | 1136.7212 |
| 1183.3035 | 1189.3599 | 1189.7356 |
| 1195.2806 | 1202.8379 | 1221.5094 |
| 1222.1189 | 1243.8957 | 1260.1228 |
| 1267.4270 | 1272.7909 | 1279.0663 |
| 1293.1425 | 1301.3078 | 1312.9450 |
| 1322.7446 | 1330.2989 | 1331.8723 |
| 1344.8030 | 1352.2575 | 1356.6431 |
| 1369.8904 | 1373.1510 | 1376.4372 |
| 1379.1408 | 1398.0070 | 1403.6631 |
| 1420.7107 | 1423.6974 | 1438.3054 |
| 1447.8578 | 1453.1541 | 1458.9284 |
| 1474.8921 | 1487.0383 | 1489.7935 |
| 1490.8009 | 1493.4130 | 1497.6100 |
| 1498.2279 | 1500.9639 | 1503.3794 |
| 1515.2022 | 1518.7945 | 1536.0613 |
| 1539.1991 | 1549.3480 | 1620.6857 |
| 1629.6305 | 1641.7824 | 1642.7440 |
| 1654.0311 | 1657.6521 | 1662.5802 |
| 1664.0185 | 2329.4640 | 2924.9355 |
| 3005.3102 | 3036.4685 | 3039.5533 |
| 3044.4070 | 3048.9947 | 3054.7206 |
| 3059.9172 | 3097.1458 | 3101.6810 |
| 3111.6087 | 3114.5529 | 3127.3591 |
| 3128.2483 | 3134.4850 | 3137.9659 |

|           |           |           |
|-----------|-----------|-----------|
| 3176.4774 | 3179.8620 | 3181.8924 |
| 3184.9311 | 3190.9924 | 3193.7490 |
| 3198.3553 | 3201.4769 | 3205.6029 |
| 3206.4051 | 3213.9983 | 3230.6877 |

**Re-M1(L2)**

Zero-point correction= 0.526249

Thermal correction to Energy= 0.557870

Thermal correction to Enthalpy= 0.558815

Thermal correction to Gibbs Free Energy= 0.462810

Sum of electronic and zero-point Energies= -1567.146862

Sum of electronic and thermal Energies= -1567.115241

Sum of electronic and thermal Enthalpies= -1567.114297

Sum of electronic and thermal Free Energies= -1567.210301

Cartesian coordinates

|   |           |           |           |
|---|-----------|-----------|-----------|
| C | -0.292955 | 0.353448  | -1.414119 |
| C | 1.191925  | 0.674852  | -1.268458 |
| C | 1.746324  | 1.685461  | -0.562246 |
| O | -0.601808 | -0.252569 | -2.567631 |
| C | 3.202961  | 1.980175  | -0.493978 |
| C | 3.659473  | 3.248328  | -0.099563 |
| C | 4.151681  | 0.995100  | -0.818579 |
| C | 5.024771  | 3.529787  | -0.047328 |
| H | 2.944063  | 4.021779  | 0.163173  |
| C | 5.513799  | 1.281153  | -0.771757 |
| H | 3.828966  | -0.005598 | -1.080228 |
| C | 5.958163  | 2.549367  | -0.386185 |
| H | 5.356373  | 4.517896  | 0.256952  |
| H | 6.230661  | 0.507028  | -1.028809 |
| H | 7.020948  | 2.767126  | -0.344260 |
| C | 0.883553  | 2.529460  | 0.220166  |
| N | 0.205974  | 3.218140  | 0.871270  |
| H | 1.829615  | 0.043454  | -1.877982 |
| H | -0.845806 | 1.300416  | -1.200518 |
| C | -0.776019 | -0.632169 | -0.318408 |
| C | -2.166557 | -2.088837 | 0.580098  |
| C | -3.228046 | -0.289337 | -0.812782 |
| H | -2.892510 | -0.107443 | -1.841741 |
| N | -0.980933 | -2.521777 | 0.912793  |
| N | -0.120602 | -1.589652 | 0.347406  |
| N | -2.087844 | -0.931359 | -0.150914 |
| C | -3.496082 | -2.746885 | 0.807736  |
| H | -3.598715 | -3.051848 | 1.851351  |
| H | -3.552010 | -3.647912 | 0.177697  |

|   |           |           |           |
|---|-----------|-----------|-----------|
| C | -4.453050 | -1.241776 | -0.777928 |
| O | -4.551458 | -1.847180 | 0.519021  |
| C | -5.157889 | 0.972580  | -0.242290 |
| C | -3.760900 | 0.963892  | -0.147849 |
| C | -3.072847 | 2.006171  | 0.463234  |
| C | -3.806974 | 3.082735  | 0.972809  |
| C | -5.201031 | 3.105888  | 0.865260  |
| C | -5.886890 | 2.047105  | 0.258473  |
| C | -5.652139 | -0.292310 | -0.910191 |
| H | -1.993559 | 1.992107  | 0.564536  |
| H | -5.758164 | 3.947400  | 1.266299  |
| H | -6.971179 | 2.057823  | 0.193632  |
| H | -5.878991 | -0.123748 | -1.969882 |
| H | -6.540666 | -0.723659 | -0.441749 |
| C | 1.299260  | -1.781384 | 0.463356  |
| C | 1.946110  | -2.520037 | -0.535267 |
| C | 1.961090  | -1.238621 | 1.573129  |
| C | 3.326725  | -2.704874 | -0.397398 |
| C | 3.336569  | -1.453079 | 1.664001  |
| C | 4.033909  | -2.180010 | 0.689827  |
| H | 3.858524  | -3.267914 | -1.159459 |
| H | 3.879874  | -1.034857 | 2.507010  |
| C | 1.209273  | -0.436593 | 2.603827  |
| H | 0.357834  | -0.999332 | 2.999496  |
| H | 0.810665  | 0.486653  | 2.168940  |
| H | 1.859977  | -0.162053 | 3.436330  |
| C | 5.528973  | -2.347159 | 0.802948  |
| H | 6.030744  | -1.383744 | 0.655155  |
| H | 5.916010  | -3.047018 | 0.058270  |
| H | 5.813454  | -2.708987 | 1.796276  |
| C | 1.174808  | -3.065143 | -1.710910 |
| H | 0.632652  | -2.262678 | -2.229305 |
| H | 0.428585  | -3.795254 | -1.377125 |
| H | 1.843290  | -3.560411 | -2.418525 |
| H | -4.403629 | -2.015029 | -1.554755 |
| H | -3.284962 | 3.902598  | 1.456456  |

Vibrational frequencies

|          |          |          |
|----------|----------|----------|
| 20.9094  | 24.0390  | 30.2353  |
| 38.6328  | 42.9907  | 58.9314  |
| 69.0489  | 72.6136  | 82.5554  |
| 93.5777  | 102.7006 | 105.8356 |
| 114.8675 | 123.2544 | 133.7666 |
| 147.8857 | 153.4977 | 159.5838 |
| 192.8363 | 196.9941 | 205.7854 |

|           |           |           |
|-----------|-----------|-----------|
| 215.5117  | 239.2587  | 243.6911  |
| 253.8443  | 266.4296  | 285.3963  |
| 287.0066  | 304.8760  | 309.7875  |
| 330.9464  | 334.2170  | 349.3290  |
| 373.8730  | 390.8855  | 402.4836  |
| 415.2609  | 420.0012  | 438.8392  |
| 460.1618  | 482.2584  | 491.4902  |
| 498.5736  | 505.8453  | 514.4123  |
| 532.2006  | 544.6757  | 557.0183  |
| 573.2051  | 580.2659  | 585.8740  |
| 612.1122  | 625.8079  | 632.3229  |
| 641.3656  | 652.0905  | 674.7514  |
| 681.8896  | 686.9068  | 709.8098  |
| 722.1491  | 740.2149  | 750.1645  |
| 757.1142  | 763.9232  | 785.9899  |
| 788.9055  | 802.0231  | 833.0117  |
| 854.8266  | 864.6295  | 871.0399  |
| 873.6283  | 891.5045  | 900.8035  |
| 909.3356  | 923.9287  | 942.5618  |
| 951.0788  | 960.0627  | 967.3803  |
| 974.0354  | 977.1403  | 987.1415  |
| 999.9460  | 1004.2807 | 1009.7463 |
| 1014.5614 | 1031.1218 | 1040.1997 |
| 1041.5422 | 1047.2553 | 1053.0515 |
| 1060.3152 | 1061.1461 | 1064.1194 |
| 1064.3070 | 1072.5485 | 1075.2559 |
| 1088.6753 | 1109.4491 | 1109.9922 |
| 1121.7667 | 1129.0787 | 1174.3352 |
| 1182.7848 | 1187.4733 | 1190.6031 |
| 1195.1442 | 1203.7923 | 1217.6423 |
| 1225.8093 | 1242.9293 | 1262.1111 |
| 1267.8611 | 1274.3766 | 1292.9623 |
| 1301.1983 | 1312.1033 | 1314.2574 |
| 1317.1615 | 1318.3540 | 1332.6812 |
| 1341.5059 | 1347.1683 | 1347.5604 |
| 1360.5153 | 1372.9479 | 1372.9835 |
| 1373.6506 | 1374.3041 | 1398.4388 |
| 1421.0663 | 1427.4206 | 1439.6948 |
| 1442.7539 | 1453.7760 | 1466.0350 |
| 1475.9830 | 1481.4238 | 1488.0013 |
| 1489.8668 | 1490.2592 | 1491.6652 |
| 1500.8724 | 1502.2422 | 1510.6750 |
| 1517.2030 | 1519.6681 | 1530.8176 |
| 1538.9986 | 1541.4380 | 1623.2622 |

|           |           |           |
|-----------|-----------|-----------|
| 1627.9096 | 1641.2332 | 1642.0560 |
| 1650.8497 | 1655.0247 | 1656.9642 |
| 1663.9151 | 2321.5941 | 2797.7800 |
| 3008.6704 | 3013.3707 | 3042.2588 |
| 3047.7325 | 3049.2817 | 3053.0933 |
| 3060.2601 | 3083.4293 | 3102.5810 |
| 3108.8436 | 3115.7618 | 3126.6672 |
| 3132.3613 | 3134.0489 | 3143.2002 |
| 3182.3281 | 3182.5552 | 3184.2044 |
| 3184.2444 | 3191.2418 | 3193.7592 |
| 3200.0972 | 3205.9784 | 3209.8253 |
| 3211.5717 | 3223.7189 | 3226.2107 |

### Si-M1(L2)

Zero-point correction= 0.526108

Thermal correction to Energy= 0.557878

Thermal correction to Enthalpy= 0.558823

Thermal correction to Gibbs Free Energy= 0.461764

Sum of electronic and zero-point Energies= -1567.142699

Sum of electronic and thermal Energies= -1567.110929

Sum of electronic and thermal Enthalpies= -1567.109985

Sum of electronic and thermal Free Energies= -1567.207043

Cartesian coordinates

|   |           |           |           |
|---|-----------|-----------|-----------|
| C | -0.647695 | 0.168148  | 1.520146  |
| C | 0.543947  | 1.083092  | 1.273300  |
| C | 0.539669  | 2.315684  | 0.717657  |
| O | -0.522344 | -0.578528 | 2.623351  |
| C | 1.762363  | 3.132189  | 0.491284  |
| C | 1.810740  | 4.064427  | -0.558426 |
| C | 2.908461  | 2.951483  | 1.284431  |
| C | 2.979502  | 4.778271  | -0.822262 |
| H | 0.933763  | 4.223080  | -1.178567 |
| C | 4.074579  | 3.664607  | 1.017488  |
| H | 2.884388  | 2.262683  | 2.122265  |
| C | 4.117712  | 4.578347  | -0.039260 |
| H | 2.998886  | 5.489406  | -1.642544 |
| H | 4.949299  | 3.512240  | 1.642385  |
| H | 5.027258  | 5.134699  | -0.243851 |
| C | -0.699154 | 2.849226  | 0.218197  |
| N | -1.685763 | 3.300992  | -0.204683 |
| H | 1.487117  | 0.673623  | 1.620023  |
| H | -1.568627 | 0.790941  | 1.443915  |
| C | -0.794898 | -0.841224 | 0.347630  |
| C | -0.610623 | -2.770997 | -0.703161 |

|   |           |           |           |
|---|-----------|-----------|-----------|
| C | 1.389527  | -2.086571 | 0.640912  |
| H | 1.305824  | -1.745938 | 1.681581  |
| N | -1.829813 | -2.376505 | -0.955936 |
| N | -1.921641 | -1.159139 | -0.298599 |
| N | 0.062849  | -1.853933 | 0.064996  |
| C | 0.015073  | -4.098013 | -1.024320 |
| H | -0.097943 | -4.329964 | -2.085658 |
| H | -0.510979 | -4.872487 | -0.445219 |
| C | 1.725370  | -3.597876 | 0.571898  |
| O | 1.402127  | -4.091178 | -0.736473 |
| C | 3.661650  | -2.334807 | 0.003632  |
| C | 2.568991  | -1.461653 | -0.083393 |
| C | 2.681187  | -0.239465 | -0.737902 |
| C | 3.922568  | 0.128205  | -1.269178 |
| C | 5.023025  | -0.725628 | -1.154511 |
| C | 4.895969  | -1.969642 | -0.524359 |
| C | 3.255729  | -3.625448 | 0.683489  |
| H | 1.828244  | 0.419252  | -0.846397 |
| H | 5.980904  | -0.429210 | -1.571427 |
| H | 5.744357  | -2.645168 | -0.462672 |
| H | 3.551839  | -3.637018 | 1.739511  |
| H | 3.665354  | -4.521232 | 0.209658  |
| C | -3.158995 | -0.426769 | -0.293197 |
| C | -4.042316 | -0.637220 | 0.774798  |
| C | -3.422061 | 0.454267  | -1.349680 |
| C | -5.236157 | 0.089910  | 0.764630  |
| C | -4.631590 | 1.151015  | -1.313857 |
| C | -5.544370 | 0.986968  | -0.264673 |
| H | -5.940505 | -0.049793 | 1.580296  |
| H | -4.862981 | 1.842300  | -2.119664 |
| C | -2.426207 | 0.647994  | -2.464677 |
| H | -2.115679 | -0.309580 | -2.893799 |
| H | -1.527559 | 1.152905  | -2.094608 |
| H | -2.849066 | 1.263167  | -3.261660 |
| C | -6.824334 | 1.786744  | -0.235464 |
| H | -6.640142 | 2.794914  | 0.154590  |
| H | -7.577047 | 1.318026  | 0.404113  |
| H | -7.246201 | 1.899975  | -1.238679 |
| C | -3.706839 | -1.609098 | 1.879467  |
| H | -2.753325 | -1.355901 | 2.361203  |
| H | -3.605325 | -2.625086 | 1.480194  |
| H | -4.493750 | -1.619027 | 2.636754  |
| H | 1.203796  | -4.180684 | 1.341305  |
| H | 4.025472  | 1.084618  | -1.772346 |

Vibrational frequencies

|           |           |           |
|-----------|-----------|-----------|
| 21.9111   | 23.7438   | 32.0550   |
| 33.9295   | 39.2283   | 45.3568   |
| 45.5993   | 71.2890   | 74.6402   |
| 85.1709   | 99.4270   | 105.5452  |
| 115.0328  | 128.0824  | 139.9009  |
| 144.3103  | 155.6328  | 167.4602  |
| 190.9109  | 195.0882  | 201.9993  |
| 210.9876  | 230.5378  | 238.7362  |
| 243.4641  | 269.6360  | 280.9420  |
| 287.4214  | 293.7076  | 306.6688  |
| 334.0112  | 335.4138  | 355.9664  |
| 375.1324  | 377.7353  | 407.3225  |
| 414.8199  | 441.7304  | 452.0120  |
| 454.2010  | 472.8799  | 488.1566  |
| 497.6480  | 511.2476  | 519.2976  |
| 529.8062  | 531.5404  | 558.8662  |
| 579.1517  | 581.9473  | 585.2507  |
| 606.3517  | 631.5951  | 634.4998  |
| 638.3383  | 654.4813  | 669.0603  |
| 685.4935  | 701.8067  | 709.3013  |
| 723.9720  | 731.5522  | 748.3632  |
| 752.3714  | 761.6290  | 776.5770  |
| 787.4386  | 807.1733  | 837.6851  |
| 859.0681  | 862.0637  | 872.1596  |
| 875.6506  | 893.1813  | 902.0791  |
| 908.9289  | 931.0851  | 943.1358  |
| 955.3473  | 960.6058  | 970.2340  |
| 975.3294  | 977.0099  | 980.9658  |
| 999.0556  | 1001.7108 | 1005.8482 |
| 1013.1839 | 1028.3860 | 1042.2194 |
| 1042.6635 | 1046.1436 | 1055.3669 |
| 1058.9465 | 1061.3329 | 1062.8676 |
| 1064.5589 | 1071.5051 | 1072.6604 |
| 1085.0253 | 1107.8602 | 1114.4864 |
| 1121.2563 | 1131.0734 | 1179.9874 |
| 1181.9292 | 1186.5084 | 1192.9172 |
| 1194.7208 | 1204.6310 | 1218.7817 |
| 1222.0165 | 1242.3084 | 1261.8768 |
| 1268.0568 | 1278.0498 | 1293.0798 |
| 1295.2248 | 1312.3330 | 1314.3416 |
| 1318.9989 | 1327.2849 | 1336.5074 |
| 1340.8511 | 1344.3389 | 1347.8783 |
| 1361.5956 | 1369.6544 | 1373.9295 |



|           |           |           |
|-----------|-----------|-----------|
| 1374.3383 | 1384.2881 | 1398.8160 |
| 1421.4637 | 1425.5081 | 1439.4303 |
| 1441.0161 | 1452.8672 | 1466.0617 |
| 1476.0996 | 1481.6005 | 1487.2388 |
| 1490.6643 | 1493.6896 | 1494.9540 |
| 1499.0785 | 1500.4338 | 1506.9155 |
| 1512.7527 | 1519.3934 | 1524.1154 |
| 1537.4586 | 1538.5840 | 1619.4539 |
| 1626.7417 | 1641.3333 | 1642.0145 |
| 1649.1700 | 1655.9251 | 1656.4353 |
| 1663.1978 | 2327.1097 | 2835.5297 |
| 3008.6041 | 3017.5652 | 3038.5869 |
| 3040.4880 | 3049.7194 | 3050.2271 |
| 3060.5634 | 3082.9040 | 3102.3271 |
| 3112.7114 | 3117.7006 | 3124.6512 |
| 3129.0558 | 3132.8491 | 3140.5902 |
| 3180.0296 | 3182.7302 | 3183.4612 |
| 3184.5462 | 3191.2563 | 3194.1148 |
| 3199.1416 | 3205.4801 | 3206.4586 |
| 3210.4490 | 3214.4174 | 3229.5332 |

### **Re-TS1(L3)**

Zero-point correction= 0.530735

Thermal correction to Energy= 0.562122

Thermal correction to Enthalpy= 0.563066

Thermal correction to Gibbs Free Energy= 0.466472

Sum of electronic and zero-point Energies= -1566.566461

Sum of electronic and thermal Energies= -1566.535073

Sum of electronic and thermal Enthalpies= -1566.534129

Sum of electronic and thermal Free Energies= -1566.630724

Cartesian coordinates

|   |           |           |           |
|---|-----------|-----------|-----------|
| C | 0.323785  | 0.545865  | 1.929742  |
| C | -1.153007 | 0.671367  | 1.696437  |
| C | -1.751945 | 1.575230  | 0.903324  |
| O | 0.732084  | -0.159793 | 2.873261  |
| C | -3.215551 | 1.667210  | 0.674767  |
| C | -3.710357 | 2.220399  | -0.510182 |
| C | -4.120149 | 1.166938  | 1.617243  |
| C | -5.077931 | 2.253723  | -0.757554 |
| H | -3.020895 | 2.611149  | -1.252549 |
| C | -5.486108 | 1.198242  | 1.367048  |
| H | -3.759514 | 0.763220  | 2.557520  |
| C | -5.970472 | 1.739801  | 0.178455  |
| H | -5.445598 | 2.680990  | -1.684706 |

|   |           |           |           |
|---|-----------|-----------|-----------|
| H | -6.176073 | 0.807875  | 2.107971  |
| H | -7.038203 | 1.766547  | -0.012924 |
| C | -0.919451 | 2.465394  | 0.136867  |
| N | -0.264430 | 3.176966  | -0.504948 |
| H | -1.758718 | -0.051847 | 2.233637  |
| H | 0.901589  | 1.425796  | 1.593014  |
| C | 0.815990  | -0.535447 | 0.241158  |
| C | 2.139578  | -2.133250 | -0.553712 |
| C | 3.258633  | -0.352469 | 0.788161  |
| H | 2.987686  | -0.166171 | 1.833726  |
| N | 0.950215  | -2.479698 | -0.946988 |
| N | 0.152146  | -1.472520 | -0.440393 |
| N | 2.097578  | -0.968732 | 0.162336  |
| C | 3.440688  | -2.850166 | -0.736284 |
| H | 3.515591  | -3.259727 | -1.744117 |
| H | 3.498920  | -3.680735 | -0.017414 |
| C | 4.481100  | -1.300189 | 0.707095  |
| O | 4.509147  | -1.949188 | -0.557862 |
| C | 5.153042  | 0.912132  | 0.122835  |
| C | 3.758610  | 0.905511  | 0.115154  |
| C | 3.033977  | 1.954552  | -0.430261 |
| C | 3.732691  | 3.033716  | -0.970984 |
| C | 5.127230  | 3.052173  | -0.956985 |
| C | 5.848045  | 1.989367  | -0.410592 |
| C | 5.684524  | -0.353417 | 0.753728  |
| H | 1.948523  | 1.937702  | -0.454449 |
| H | 5.657028  | 3.897792  | -1.383948 |
| H | 6.933873  | 2.001188  | -0.415191 |
| H | 5.982813  | -0.180095 | 1.793631  |
| H | 6.537558  | -0.787761 | 0.227633  |
| C | -1.268668 | -1.537023 | -0.606675 |
| C | -2.008818 | -2.243290 | 0.344193  |
| C | -1.855976 | -0.859328 | -1.674805 |
| C | -3.394603 | -2.252686 | 0.201658  |
| C | -3.244478 | -0.907224 | -1.781037 |
| C | -4.027392 | -1.593448 | -0.853650 |
| H | -3.995310 | -2.785384 | 0.934499  |
| H | -3.727766 | -0.377562 | -2.597544 |
| C | -1.016188 | -0.079848 | -2.650987 |
| H | -0.213653 | -0.697464 | -3.064663 |
| H | -0.544488 | 0.779587  | -2.163302 |
| H | -1.626455 | 0.291950  | -3.476263 |
| C | -5.525971 | -1.637137 | -0.998648 |
| H | -5.899773 | -0.731645 | -1.482097 |

|   |           |           |           |
|---|-----------|-----------|-----------|
| H | -6.014061 | -1.726620 | -0.024989 |
| H | -5.831938 | -2.496033 | -1.606190 |
| C | -1.322910 | -2.945045 | 1.487265  |
| H | -0.724325 | -2.249107 | 2.086409  |
| H | -0.640182 | -3.716015 | 1.116609  |
| H | -2.053950 | -3.421735 | 2.143194  |
| H | 4.477283  | -2.048307 | 1.509577  |
| H | 3.184128  | 3.862236  | -1.406965 |

Vibrational frequencies

|           |           |           |
|-----------|-----------|-----------|
| -211.0109 | 9.2837    | 24.9460   |
| 32.0874   | 36.9976   | 44.7138   |
| 57.0390   | 62.2626   | 71.6298   |
| 74.8970   | 79.0849   | 87.0383   |
| 116.0277  | 116.4600  | 121.4069  |
| 138.4853  | 148.6651  | 152.6624  |
| 156.0973  | 185.3029  | 200.4762  |
| 213.8077  | 219.9399  | 226.6712  |
| 245.9418  | 252.3025  | 268.7148  |
| 286.4371  | 294.7219  | 298.7325  |
| 314.6034  | 327.9308  | 344.6090  |
| 360.8464  | 366.1520  | 387.1127  |
| 408.2005  | 418.1049  | 441.1433  |
| 459.4286  | 461.0940  | 482.1884  |
| 494.5107  | 500.1316  | 516.0780  |
| 519.3073  | 536.4442  | 542.8229  |
| 561.1441  | 587.0360  | 589.2096  |
| 591.3961  | 618.0398  | 633.5266  |
| 636.2079  | 645.4382  | 669.2323  |
| 680.1368  | 698.4605  | 715.0601  |
| 723.8647  | 730.6888  | 754.8438  |
| 764.5401  | 768.8315  | 787.5859  |
| 794.6488  | 810.7247  | 844.0810  |
| 859.6467  | 877.8072  | 880.2538  |
| 881.8280  | 899.5736  | 906.2227  |
| 912.4034  | 920.0652  | 953.2807  |
| 964.2419  | 968.4293  | 981.8058  |
| 985.0866  | 989.5846  | 1004.2839 |
| 1006.9082 | 1023.0860 | 1023.6718 |
| 1027.6507 | 1027.9597 | 1044.7251 |
| 1050.0284 | 1050.8042 | 1062.1534 |
| 1067.5476 | 1071.3435 | 1074.0770 |
| 1075.2674 | 1077.3025 | 1083.7448 |
| 1086.9028 | 1114.6427 | 1121.4633 |
| 1133.0794 | 1138.4210 | 1168.9533 |

|           |           |           |
|-----------|-----------|-----------|
| 1186.8368 | 1194.2152 | 1198.7088 |
| 1207.7375 | 1221.7026 | 1230.6192 |
| 1239.1854 | 1261.4164 | 1281.9073 |
| 1285.2090 | 1290.2891 | 1298.0243 |
| 1308.2455 | 1313.2541 | 1327.1806 |
| 1328.7836 | 1341.1301 | 1345.5652 |
| 1355.7798 | 1361.1834 | 1374.2391 |
| 1381.7912 | 1382.1879 | 1393.2386 |
| 1395.7965 | 1422.8953 | 1428.2498 |
| 1429.1126 | 1435.1368 | 1452.6439 |
| 1465.0061 | 1472.6731 | 1477.8252 |
| 1494.2174 | 1495.0781 | 1498.7743 |
| 1500.4313 | 1501.5517 | 1505.6245 |
| 1506.9571 | 1516.1606 | 1518.0025 |
| 1529.9349 | 1535.0744 | 1558.1725 |
| 1571.0809 | 1626.5506 | 1664.2298 |
| 1667.7556 | 1675.2555 | 1682.9597 |
| 1693.7786 | 1695.4727 | 1697.4701 |
| 1720.3905 | 2372.0846 | 2971.9698 |
| 3036.3004 | 3063.5215 | 3063.9559 |
| 3072.2579 | 3073.3247 | 3088.8218 |
| 3091.4226 | 3134.1551 | 3139.5877 |
| 3144.6907 | 3155.3535 | 3167.8094 |
| 3169.8498 | 3170.8400 | 3173.6270 |
| 3203.1049 | 3211.4051 | 3212.8393 |
| 3214.6375 | 3218.3616 | 3225.1887 |
| 3227.6001 | 3229.3792 | 3236.4719 |
| 3242.7487 | 3244.3446 | 3244.7176 |

### ***Si-TS1(L3)***

Zero-point correction= 0.530987

Thermal correction to Energy= 0.562222

Thermal correction to Enthalpy= 0.563166

Thermal correction to Gibbs Free Energy= 0.468139

Sum of electronic and zero-point Energies= -1566.561042

Sum of electronic and thermal Energies= -1566.529807

Sum of electronic and thermal Enthalpies= -1566.528863

Sum of electronic and thermal Free Energies= -1566.623890

Cartesian coordinates

|   |           |           |          |
|---|-----------|-----------|----------|
| C | -0.664465 | 0.253452  | 2.036200 |
| C | 0.512061  | 1.108477  | 1.676359 |
| C | 0.470958  | 2.280050  | 1.020149 |
| O | -0.544013 | -0.601818 | 2.933794 |
| C | 1.682310  | 3.030785  | 0.600600 |

|   |           |           |           |
|---|-----------|-----------|-----------|
| C | 1.687461  | 3.734160  | -0.608462 |
| C | 2.854306  | 2.981019  | 1.362391  |
| C | 2.849203  | 4.352499  | -1.059200 |
| H | 0.782008  | 3.786502  | -1.206072 |
| C | 4.013385  | 3.599339  | 0.909586  |
| H | 2.857889  | 2.466124  | 2.317769  |
| C | 4.017043  | 4.282687  | -0.304334 |
| H | 2.840304  | 4.886917  | -2.003431 |
| H | 4.915746  | 3.552390  | 1.510234  |
| H | 4.923179  | 4.764496  | -0.656297 |
| C | -0.799589 | 2.790815  | 0.575623  |
| N | -1.808163 | 3.224463  | 0.199973  |
| H | 1.476812  | 0.701501  | 1.967387  |
| H | -1.643583 | 0.718990  | 1.820114  |
| C | -0.746584 | -0.848238 | 0.289188  |
| C | -0.592506 | -2.882287 | -0.592473 |
| C | 1.415795  | -2.071308 | 0.638124  |
| H | 1.378452  | -1.760706 | 1.689103  |
| N | -1.796086 | -2.493506 | -0.894144 |
| N | -1.860511 | -1.230927 | -0.336320 |
| N | 0.069714  | -1.915785 | 0.113599  |
| C | 0.064321  | -4.204127 | -0.846246 |
| H | -0.146347 | -4.549567 | -1.858876 |
| H | -0.333190 | -4.943650 | -0.135654 |
| C | 1.867791  | -3.546933 | 0.534188  |
| O | 1.463225  | -4.081652 | -0.719887 |
| C | 3.656405  | -2.118811 | -0.134707 |
| C | 2.501950  | -1.336094 | -0.116673 |
| C | 2.473577  | -0.081852 | -0.706901 |
| C | 3.642358  | 0.410993  | -1.286345 |
| C | 4.807175  | -0.355114 | -1.281654 |
| C | 4.819819  | -1.630768 | -0.714260 |
| C | 3.397338  | -3.456427 | 0.519433  |
| H | 1.561869  | 0.504953  | -0.723527 |
| H | 5.710772  | 0.039301  | -1.735540 |
| H | 5.723194  | -2.232885 | -0.736110 |
| H | 3.782480  | -3.478917 | 1.544979  |
| H | 3.830230  | -4.302184 | -0.019529 |
| C | -3.072400 | -0.471881 | -0.396460 |
| C | -4.026610 | -0.673130 | 0.603942  |
| C | -3.236646 | 0.453615  | -1.428049 |
| C | -5.190435 | 0.090968  | 0.543610  |
| C | -4.418424 | 1.190375  | -1.448648 |
| C | -5.400784 | 1.025681  | -0.471232 |

|   |           |           |           |
|---|-----------|-----------|-----------|
| H | -5.949484 | -0.045337 | 1.309590  |
| H | -4.570319 | 1.918942  | -2.240703 |
| C | -2.161040 | 0.654983  | -2.461125 |
| H | -1.876078 | -0.291570 | -2.929516 |
| H | -1.261615 | 1.077513  | -2.001245 |
| H | -2.496152 | 1.341198  | -3.240938 |
| C | -6.650348 | 1.867838  | -0.495117 |
| H | -6.477178 | 2.825754  | 0.006833  |
| H | -7.477707 | 1.370318  | 0.016922  |
| H | -6.961024 | 2.086351  | -1.520090 |
| C | -3.791289 | -1.676715 | 1.702720  |
| H | -2.880655 | -1.445509 | 2.267461  |
| H | -3.667847 | -2.682620 | 1.289146  |
| H | -4.632319 | -1.692193 | 2.398482  |
| H | 1.469281  | -4.161478 | 1.351034  |
| H | 3.640092  | 1.399083  | -1.735894 |

Vibrational frequencies

|           |          |          |
|-----------|----------|----------|
| -213.4914 | 21.5930  | 34.3092  |
| 35.2376   | 43.1025  | 46.1818  |
| 50.5153   | 69.1075  | 71.5487  |
| 73.1911   | 84.3221  | 91.6164  |
| 117.5122  | 124.4487 | 127.4633 |
| 138.9778  | 152.2541 | 157.2483 |
| 163.2488  | 188.5231 | 200.3388 |
| 204.4067  | 212.6855 | 230.9409 |
| 243.8095  | 253.2635 | 273.5022 |
| 287.8748  | 293.4148 | 296.1750 |
| 313.6213  | 331.3960 | 349.7103 |
| 359.9068  | 368.6021 | 388.1332 |
| 411.1536  | 418.7803 | 437.4130 |
| 447.9174  | 465.8536 | 483.6012 |
| 492.8777  | 500.3210 | 516.7413 |
| 523.3466  | 535.6802 | 543.5816 |
| 562.7172  | 581.2789 | 586.9412 |
| 594.0665  | 620.1743 | 635.0663 |
| 636.9300  | 648.2202 | 673.2764 |
| 680.7989  | 693.6280 | 712.9957 |
| 719.4760  | 731.1124 | 754.9712 |
| 763.2620  | 775.8034 | 786.4439 |
| 799.2222  | 811.4480 | 844.0591 |
| 864.9210  | 876.0413 | 885.2728 |
| 892.7673  | 903.2072 | 918.6929 |
| 924.0832  | 927.4174 | 957.6290 |
| 965.9344  | 969.7496 | 982.1141 |

|           |           |           |
|-----------|-----------|-----------|
| 986.3466  | 993.7051  | 1006.2470 |
| 1007.4011 | 1023.7321 | 1026.3640 |
| 1030.1335 | 1036.1469 | 1045.6504 |
| 1048.6418 | 1049.9008 | 1061.5246 |
| 1069.5612 | 1069.8763 | 1074.9687 |
| 1077.3409 | 1079.8827 | 1083.7868 |
| 1089.3173 | 1106.2242 | 1117.3286 |
| 1124.7188 | 1145.3430 | 1168.0208 |
| 1186.3820 | 1193.4618 | 1193.7113 |
| 1207.3391 | 1219.1269 | 1219.2321 |
| 1238.7939 | 1258.9923 | 1272.7932 |
| 1281.0804 | 1291.8208 | 1298.2408 |
| 1307.9935 | 1313.3057 | 1319.0648 |
| 1325.6515 | 1339.7446 | 1347.6409 |
| 1355.1195 | 1361.2339 | 1367.5870 |
| 1370.1316 | 1379.9939 | 1394.2253 |
| 1414.6111 | 1418.1083 | 1428.4037 |
| 1433.2399 | 1434.3207 | 1446.6981 |
| 1471.3842 | 1473.5773 | 1476.4660 |
| 1495.7984 | 1498.6232 | 1499.3378 |
| 1501.0145 | 1502.7556 | 1504.4865 |
| 1507.2322 | 1514.8199 | 1517.5208 |
| 1527.6756 | 1534.8064 | 1550.8044 |
| 1571.4582 | 1633.9810 | 1662.6981 |
| 1666.3133 | 1675.2195 | 1683.4574 |
| 1690.1965 | 1696.3374 | 1698.3622 |
| 1722.8992 | 2376.6296 | 2975.2569 |
| 3037.2771 | 3059.9475 | 3066.0228 |
| 3072.2974 | 3078.1137 | 3090.5052 |
| 3093.8087 | 3130.7604 | 3140.5251 |
| 3145.0737 | 3155.5186 | 3160.1307 |
| 3168.9552 | 3171.7611 | 3173.3331 |
| 3197.6339 | 3204.4852 | 3210.8925 |
| 3214.1210 | 3219.9257 | 3226.6123 |
| 3228.2744 | 3232.3895 | 3237.6231 |
| 3239.1291 | 3248.2374 | 3248.6574 |

**Re-M1(L3)**

Zero-point correction= 0.532575

Thermal correction to Energy= 0.563842

Thermal correction to Enthalpy= 0.564786

Thermal correction to Gibbs Free Energy= 0.469565

Sum of electronic and zero-point Energies= -1566.574924

Sum of electronic and thermal Energies= -1566.543657

Sum of electronic and thermal Enthalpies= -1566.542713

Sum of electronic and thermal Free Energies= -1566.637935

Cartesian coordinates

|   |           |           |           |
|---|-----------|-----------|-----------|
| C | -0.304136 | 0.345251  | -1.432008 |
| C | 1.180127  | 0.672670  | -1.300492 |
| C | 1.735875  | 1.647498  | -0.560555 |
| O | -0.624950 | -0.257960 | -2.574172 |
| C | 3.190581  | 1.948520  | -0.493322 |
| C | 3.638608  | 3.198249  | -0.053514 |
| C | 4.136476  | 0.987189  | -0.867651 |
| C | 4.998947  | 3.486058  | -0.002765 |
| H | 2.920277  | 3.954116  | 0.249641  |
| C | 5.493922  | 1.279600  | -0.824200 |
| H | 3.816291  | -0.004341 | -1.168470 |
| C | 5.931796  | 2.529808  | -0.391317 |
| H | 5.327764  | 4.461549  | 0.340454  |
| H | 6.213219  | 0.523670  | -1.122992 |
| H | 6.992985  | 2.752357  | -0.350466 |
| C | 0.873945  | 2.457487  | 0.261065  |
| N | 0.192665  | 3.110362  | 0.937739  |
| H | 1.813975  | 0.068571  | -1.942981 |
| H | -0.854858 | 1.292711  | -1.211404 |
| C | -0.768580 | -0.630059 | -0.323101 |
| C | -2.143579 | -2.056887 | 0.613967  |
| C | -3.212600 | -0.301636 | -0.806910 |
| H | -2.880754 | -0.129068 | -1.838468 |
| N | -0.958759 | -2.477831 | 0.945216  |
| N | -0.111360 | -1.567344 | 0.356014  |
| N | -2.072314 | -0.921892 | -0.140745 |
| C | -3.468211 | -2.713415 | 0.857801  |
| H | -3.569639 | -2.990295 | 1.907891  |
| H | -3.518388 | -3.628278 | 0.249983  |
| C | -4.423072 | -1.262335 | -0.754569 |
| O | -4.517839 | -1.831065 | 0.546974  |
| C | -5.150322 | 0.946299  | -0.264753 |
| C | -3.758620 | 0.952283  | -0.160230 |
| C | -3.087927 | 2.004170  | 0.444721  |
| C | -3.834999 | 3.074817  | 0.936372  |
| C | -5.223819 | 3.083505  | 0.816974  |
| C | -5.892403 | 2.015464  | 0.216874  |
| C | -5.625706 | -0.330371 | -0.917560 |
| H | -2.008441 | 2.004379  | 0.556489  |
| H | -5.791340 | 3.923318  | 1.204926  |
| H | -6.975595 | 2.015568  | 0.141807  |



|   |           |           |           |
|---|-----------|-----------|-----------|
| H | -5.837241 | -0.177819 | -1.981580 |
| H | -6.515748 | -0.760428 | -0.453249 |
| C | 1.306833  | -1.752840 | 0.465903  |
| C | 1.952672  | -2.477600 | -0.536303 |
| C | 1.965459  | -1.209298 | 1.571071  |
| C | 3.331362  | -2.651251 | -0.404871 |
| C | 3.339008  | -1.409906 | 1.655196  |
| C | 4.035635  | -2.124854 | 0.677678  |
| H | 3.865073  | -3.206514 | -1.171413 |
| H | 3.881911  | -0.989624 | 2.497350  |
| C | 1.211919  | -0.427767 | 2.612226  |
| H | 0.417140  | -1.032133 | 3.059559  |
| H | 0.739853  | 0.458632  | 2.176079  |
| H | 1.882154  | -0.095530 | 3.406445  |
| C | 5.529523  | -2.280620 | 0.783319  |
| H | 6.020133  | -1.310102 | 0.653138  |
| H | 5.917081  | -2.962494 | 0.023301  |
| H | 5.817577  | -2.661987 | 1.767106  |
| C | 1.184956  | -3.024677 | -1.709921 |
| H | 0.630730  | -2.226977 | -2.223200 |
| H | 0.453954  | -3.769518 | -1.377954 |
| H | 1.859913  | -3.503961 | -2.421436 |
| H | -4.362771 | -2.053071 | -1.512060 |
| H | -3.326589 | 3.904304  | 1.416779  |

Vibrational frequencies

|          |          |          |
|----------|----------|----------|
| 17.8354  | 24.8249  | 28.7258  |
| 40.8370  | 44.1808  | 62.6119  |
| 76.2494  | 82.6337  | 84.5253  |
| 94.3878  | 106.8060 | 114.8596 |
| 120.0667 | 120.5921 | 134.1140 |
| 141.9938 | 153.5889 | 165.4023 |
| 194.0708 | 199.2726 | 208.5604 |
| 213.5947 | 239.4615 | 245.1305 |
| 252.6239 | 274.0804 | 286.8272 |
| 289.1410 | 308.0729 | 312.2814 |
| 335.3058 | 337.2878 | 353.5372 |
| 377.9742 | 395.9854 | 408.1075 |
| 419.3106 | 425.7468 | 442.5942 |
| 464.9827 | 487.5119 | 498.0702 |
| 504.6553 | 508.0066 | 517.1712 |
| 535.8177 | 550.9339 | 560.9682 |
| 580.4153 | 586.2626 | 591.9173 |
| 620.2190 | 631.2480 | 638.3477 |
| 648.6644 | 660.5911 | 681.9366 |

|           |           |           |
|-----------|-----------|-----------|
| 695.3012  | 700.7970  | 714.9807  |
| 733.2651  | 751.1246  | 764.5124  |
| 769.8553  | 776.3642  | 793.3850  |
| 801.9092  | 813.3923  | 843.7518  |
| 870.1543  | 872.3341  | 884.2297  |
| 886.8718  | 905.2337  | 916.5591  |
| 925.2326  | 945.9163  | 960.4377  |
| 965.7170  | 969.0744  | 979.1494  |
| 987.2377  | 991.2030  | 1003.9513 |
| 1021.3173 | 1024.0417 | 1025.1631 |
| 1025.7198 | 1042.2246 | 1047.3563 |
| 1049.4419 | 1058.0485 | 1064.5093 |
| 1067.5304 | 1072.6963 | 1074.2100 |
| 1078.9853 | 1082.1873 | 1092.1400 |
| 1116.6647 | 1121.4941 | 1130.2218 |
| 1132.2767 | 1176.8103 | 1187.4704 |
| 1195.1545 | 1196.6775 | 1205.7528 |
| 1219.4266 | 1222.0929 | 1230.1321 |
| 1237.7275 | 1261.3416 | 1281.1978 |
| 1287.7540 | 1290.5552 | 1294.4265 |
| 1307.9733 | 1323.3979 | 1328.0468 |
| 1330.8691 | 1335.1320 | 1343.6036 |
| 1348.6443 | 1357.6629 | 1364.2241 |
| 1378.1226 | 1381.1722 | 1383.7889 |
| 1392.6443 | 1395.0778 | 1421.7823 |
| 1428.5902 | 1433.3818 | 1447.2697 |
| 1469.0851 | 1474.6228 | 1486.6773 |
| 1489.2398 | 1492.2245 | 1494.9182 |
| 1496.2139 | 1503.2116 | 1504.4494 |
| 1516.9476 | 1517.4999 | 1520.8107 |
| 1532.2177 | 1535.5443 | 1549.4555 |
| 1557.8450 | 1586.3120 | 1665.5955 |
| 1668.7270 | 1676.9734 | 1680.6737 |
| 1690.8264 | 1692.0250 | 1698.1284 |
| 1708.6380 | 2367.7194 | 2815.5708 |
| 3022.2621 | 3041.8098 | 3066.3524 |
| 3074.3863 | 3077.2402 | 3082.2424 |
| 3094.0451 | 3113.2611 | 3140.9104 |
| 3145.4463 | 3159.5494 | 3166.5262 |
| 3166.7460 | 3167.0048 | 3178.5312 |
| 3210.4488 | 3216.8023 | 3217.0968 |
| 3218.1083 | 3222.7098 | 3223.6136 |
| 3225.5013 | 3233.2686 | 3240.0033 |
| 3242.6753 | 3247.4380 | 3250.2576 |

**Si-M1(L3)**

Zero-point correction= 0.533078

Thermal correction to Energy= 0.564156

Thermal correction to Enthalpy= 0.565100

Thermal correction to Gibbs Free Energy= 0.471040

Sum of electronic and zero-point Energies= -1566.569716

Sum of electronic and thermal Energies= -1566.538638

Sum of electronic and thermal Enthalpies= -1566.537694

Sum of electronic and thermal Free Energies= -1566.631754

Cartesian coordinates

|   |           |           |           |
|---|-----------|-----------|-----------|
| C | -0.687337 | 0.092661  | 1.607075  |
| C | 0.467998  | 1.055504  | 1.373893  |
| C | 0.424539  | 2.265434  | 0.791241  |
| O | -0.544153 | -0.679834 | 2.677821  |
| C | 1.641054  | 3.075373  | 0.513483  |
| C | 1.756232  | 3.775454  | -0.691756 |
| C | 2.714859  | 3.080561  | 1.408924  |
| C | 2.933290  | 4.447011  | -1.006098 |
| H | 0.927391  | 3.782943  | -1.393749 |
| C | 3.889257  | 3.754069  | 1.093052  |
| H | 2.625539  | 2.566020  | 2.360410  |
| C | 4.004795  | 4.434426  | -0.116895 |
| H | 3.013221  | 4.977578  | -1.949204 |
| H | 4.713529  | 3.752221  | 1.798641  |
| H | 4.922902  | 4.958469  | -0.361359 |
| C | -0.827001 | 2.779097  | 0.298889  |
| N | -1.819241 | 3.223208  | -0.107823 |
| H | 1.431325  | 0.688887  | 1.720518  |
| H | -1.629777 | 0.685673  | 1.538690  |
| C | -0.785899 | -0.877746 | 0.397019  |
| C | -0.522734 | -2.741639 | -0.726142 |
| C | 1.431818  | -2.047701 | 0.655838  |
| H | 1.340991  | -1.751748 | 1.709250  |
| N | -1.742302 | -2.371039 | -0.987517 |
| N | -1.881868 | -1.198473 | -0.284546 |
| N | 0.103785  | -1.844853 | 0.091942  |
| C | 0.152776  | -4.030096 | -1.088556 |
| H | 0.046806  | -4.229078 | -2.155744 |
| H | -0.340609 | -4.841458 | -0.534331 |
| C | 1.826216  | -3.534646 | 0.521335  |
| O | 1.528018  | -3.974634 | -0.799696 |
| C | 3.703351  | -2.178298 | 0.006993  |
| C | 2.578938  | -1.352238 | -0.050541 |

|   |           |           |           |
|---|-----------|-----------|-----------|
| C | 2.634895  | -0.116309 | -0.676705 |
| C | 3.853117  | 0.318182  | -1.199296 |
| C | 4.986415  | -0.487375 | -1.109176 |
| C | 4.914979  | -1.748878 | -0.515104 |
| C | 3.351175  | -3.503424 | 0.643157  |
| H | 1.753152  | 0.506107  | -0.772662 |
| H | 5.927999  | -0.139084 | -1.521389 |
| H | 5.790683  | -2.389714 | -0.477824 |
| H | 3.640529  | -3.533294 | 1.699498  |
| H | 3.801097  | -4.364189 | 0.143894  |
| C | -3.119580 | -0.475240 | -0.303959 |
| C | -4.034702 | -0.705020 | 0.725850  |
| C | -3.340045 | 0.428968  | -1.343743 |
| C | -5.221008 | 0.024955  | 0.691942  |
| C | -4.543329 | 1.128639  | -1.334807 |
| C | -5.488182 | 0.944370  | -0.324029 |
| H | -5.953681 | -0.127622 | 1.479917  |
| H | -4.742460 | 1.843706  | -2.128183 |
| C | -2.306869 | 0.636269  | -2.417952 |
| H | -2.083203 | -0.300124 | -2.937589 |
| H | -1.371147 | 1.010111  | -1.989725 |
| H | -2.653015 | 1.365862  | -3.151659 |
| C | -6.760562 | 1.751246  | -0.314073 |
| H | -6.596723 | 2.716357  | 0.176978  |
| H | -7.556750 | 1.234952  | 0.227738  |
| H | -7.109736 | 1.954497  | -1.329576 |
| C | -3.737344 | -1.698592 | 1.818156  |
| H | -2.790886 | -1.467859 | 2.323982  |
| H | -3.647023 | -2.708197 | 1.402996  |
| H | -4.538716 | -1.705920 | 2.559080  |
| H | 1.327085  | -4.172707 | 1.260375  |
| H | 3.911256  | 1.291354  | -1.676459 |

Vibrational frequencies

|          |          |          |
|----------|----------|----------|
| 24.4090  | 30.3374  | 37.9279  |
| 41.5444  | 47.4551  | 53.4550  |
| 75.3743  | 81.2853  | 89.9555  |
| 101.6071 | 104.3370 | 106.9815 |
| 124.2169 | 140.7282 | 148.9513 |
| 155.8695 | 162.9758 | 171.0986 |
| 196.2192 | 202.2644 | 208.1684 |
| 220.5306 | 235.1933 | 247.9323 |
| 250.4670 | 275.3931 | 280.7088 |
| 289.4148 | 294.8878 | 310.2236 |
| 336.8807 | 337.7268 | 363.4722 |

|           |           |           |
|-----------|-----------|-----------|
| 377.1582  | 380.9006  | 413.2109  |
| 420.6773  | 447.6368  | 453.2826  |
| 458.1928  | 476.0002  | 493.2407  |
| 503.5890  | 515.0520  | 524.0125  |
| 538.4443  | 541.3177  | 564.0739  |
| 586.4727  | 589.4943  | 591.7399  |
| 613.3065  | 634.8751  | 642.4285  |
| 645.6517  | 664.5403  | 678.8311  |
| 698.0509  | 713.6155  | 724.3547  |
| 734.4430  | 747.9007  | 763.1550  |
| 764.8879  | 774.6337  | 785.4647  |
| 803.8816  | 822.0135  | 846.9451  |
| 879.1349  | 882.6058  | 887.3156  |
| 891.0053  | 907.2953  | 921.3581  |
| 924.7571  | 953.2705  | 965.8800  |
| 969.5373  | 971.1432  | 983.5091  |
| 988.2912  | 993.7224  | 1010.2416 |
| 1018.7026 | 1023.5081 | 1027.7215 |
| 1035.2933 | 1043.2413 | 1044.2054 |
| 1054.3988 | 1061.0296 | 1067.5153 |
| 1070.4419 | 1074.1910 | 1075.9793 |
| 1079.0360 | 1080.4832 | 1093.2016 |
| 1102.2752 | 1119.6077 | 1124.8755 |
| 1138.9031 | 1175.8770 | 1188.6231 |
| 1193.2210 | 1193.7639 | 1206.8938 |
| 1216.1193 | 1222.5561 | 1232.3604 |
| 1239.7937 | 1257.6613 | 1274.5284 |
| 1287.9895 | 1294.2087 | 1297.5383 |
| 1306.8164 | 1321.5019 | 1324.5725 |
| 1331.3198 | 1335.6293 | 1347.5536 |
| 1348.8326 | 1360.7681 | 1364.0309 |
| 1372.3994 | 1380.8838 | 1384.9502 |
| 1388.7997 | 1409.6345 | 1415.2964 |
| 1429.4939 | 1434.4419 | 1449.5999 |
| 1470.8735 | 1476.5741 | 1481.4458 |
| 1491.3611 | 1496.7083 | 1501.5134 |
| 1501.8803 | 1503.1754 | 1507.1483 |
| 1516.3476 | 1520.9774 | 1522.6751 |
| 1529.8048 | 1534.1973 | 1547.4653 |
| 1553.6407 | 1580.0829 | 1661.5031 |
| 1664.0996 | 1675.6554 | 1682.8631 |
| 1690.9069 | 1693.5898 | 1698.2479 |
| 1707.3763 | 2373.6046 | 2846.2128 |
| 3041.7135 | 3042.5224 | 3067.1612 |

|           |           |           |
|-----------|-----------|-----------|
| 3070.4882 | 3071.5906 | 3081.4397 |
| 3092.6106 | 3118.6303 | 3141.7646 |
| 3143.0555 | 3157.9078 | 3163.7240 |
| 3165.7807 | 3171.1365 | 3174.0207 |
| 3205.0841 | 3210.9419 | 3212.4762 |
| 3218.3540 | 3219.2362 | 3222.5799 |
| 3224.0434 | 3230.4241 | 3234.8799 |
| 3238.7847 | 3248.7409 | 3262.5244 |

### DMAP

Zero-point correction= 0.163817

Thermal correction to Energy= 0.172277

Thermal correction to Enthalpy= 0.173222

Thermal correction to Gibbs Free Energy= 0.130351

Sum of electronic and zero-point Energies= -381.936949

Sum of electronic and thermal Energies= -381.928489

Sum of electronic and thermal Enthalpies= -381.927545

Sum of electronic and thermal Free Energies= -381.970416

Cartesian coordinates

|   |           |           |           |
|---|-----------|-----------|-----------|
| C | -1.947173 | 1.130360  | 0.000984  |
| C | -0.563594 | 1.197377  | 0.002408  |
| C | 0.185377  | -0.000547 | 0.000705  |
| C | -0.564188 | -1.198047 | -0.000257 |
| C | -1.947781 | -1.130292 | -0.001594 |
| H | -2.516968 | 2.057890  | 0.002306  |
| H | -0.081755 | 2.166582  | 0.006016  |
| H | -0.082865 | -2.167475 | 0.000866  |
| H | -2.518052 | -2.057529 | -0.002704 |
| C | 2.270166  | -1.258434 | 0.001480  |
| C | 2.268237  | 1.259200  | -0.003118 |
| H | 2.034365  | -1.855827 | -0.887164 |
| H | 3.339815  | -1.055107 | 0.001611  |
| H | 2.034553  | -1.856591 | 0.889467  |
| H | 2.024423  | 1.856283  | -0.889637 |
| H | 2.038718  | 1.857249  | 0.886867  |
| H | 3.338120  | 1.057632  | -0.011745 |
| N | 1.548094  | -0.000313 | 0.001505  |
| N | -2.664752 | 0.000198  | -0.001437 |

Vibrational frequencies

|          |          |          |
|----------|----------|----------|
| 64.8189  | 97.3021  | 162.9976 |
| 227.9481 | 253.5068 | 290.1659 |
| 389.4165 | 417.2946 | 483.8453 |
| 546.5316 | 552.2094 | 679.9548 |
| 755.9872 | 777.7993 | 825.3240 |

|           |           |           |
|-----------|-----------|-----------|
| 841.6084  | 987.6619  | 991.4435  |
| 1010.0720 | 1018.4285 | 1096.2050 |
| 1105.6347 | 1147.2974 | 1151.6009 |
| 1154.9546 | 1214.1802 | 1263.1216 |
| 1283.9650 | 1354.9524 | 1390.3959 |
| 1429.5477 | 1455.4090 | 1490.3367 |
| 1492.8976 | 1496.7522 | 1500.8707 |
| 1525.2426 | 1539.8105 | 1583.9355 |
| 1631.5437 | 1691.3599 | 3048.5524 |
| 3056.6967 | 3109.2493 | 3110.3954 |
| 3178.2142 | 3180.9779 | 3184.3857 |
| 3190.3278 | 3236.9914 | 3237.2895 |

### DMAP·H<sup>+</sup>

Zero-point correction= 0.178411

Thermal correction to Energy= 0.186881

Thermal correction to Enthalpy= 0.187825

Thermal correction to Gibbs Free Energy= 0.145361

Sum of electronic and zero-point Energies= -382.377724

Sum of electronic and thermal Energies= -382.369253

Sum of electronic and thermal Enthalpies= -382.368309

Sum of electronic and thermal Free Energies= -382.410773

Cartesian coordinates

|   |           |           |           |
|---|-----------|-----------|-----------|
| C | 1.877312  | 1.178441  | -0.004259 |
| C | 0.513869  | 1.215971  | -0.005146 |
| C | -0.235607 | -0.000296 | -0.001575 |
| C | 0.513611  | -1.216477 | 0.003771  |
| C | 1.876946  | -1.178731 | 0.004822  |
| H | 2.485154  | 2.073427  | -0.008421 |
| H | 0.026881  | 2.180262  | -0.009046 |
| H | 0.026725  | -2.180815 | 0.010174  |
| H | 2.484631  | -2.073828 | 0.007673  |
| C | -2.304794 | -1.262581 | -0.007471 |
| C | -2.303331 | 1.263394  | 0.008469  |
| H | -2.085458 | -1.843887 | 0.892742  |
| H | -3.370148 | -1.048326 | -0.031174 |
| H | -2.049825 | -1.854591 | -0.890586 |
| H | -2.041637 | 1.856003  | 0.889527  |
| H | -2.089127 | 1.843786  | -0.893393 |
| H | -3.368775 | 1.050345  | 0.039795  |
| N | -1.569438 | 0.000038  | -0.000869 |
| N | 2.540897  | -0.000445 | 0.001231  |
| H | 3.553336  | 0.002145  | -0.001487 |

Vibrational frequencies

|           |           |           |
|-----------|-----------|-----------|
| 94.8310   | 129.2605  | 163.2601  |
| 211.5568  | 250.2239  | 310.8687  |
| 391.8906  | 438.5057  | 491.2751  |
| 516.3025  | 553.0898  | 652.5468  |
| 716.5048  | 730.9503  | 777.9566  |
| 832.0660  | 846.3925  | 976.7692  |
| 1011.1573 | 1012.1409 | 1016.1971 |
| 1076.7458 | 1096.1133 | 1141.7134 |
| 1142.2713 | 1160.6309 | 1217.2612 |
| 1236.2263 | 1267.4594 | 1294.2382 |
| 1376.0192 | 1454.5058 | 1456.1778 |
| 1464.8798 | 1489.4083 | 1499.1479 |
| 1510.2900 | 1510.5072 | 1534.5090 |
| 1596.8232 | 1636.2488 | 1650.0071 |
| 1732.2008 | 3078.4827 | 3084.3764 |
| 3153.2021 | 3154.3863 | 3203.2934 |
| 3217.0807 | 3264.3790 | 3264.9974 |
| 3294.7588 | 3295.7542 | 3635.3517 |

### **Re-TS2**

Zero-point correction= 0.706048

Thermal correction to Energy= 0.747397

Thermal correction to Enthalpy= 0.748341

Thermal correction to Gibbs Free Energy= 0.630656

Sum of electronic and zero-point Energies= -1948.815891

Sum of electronic and thermal Energies= -1948.774543

Sum of electronic and thermal Enthalpies= -1948.773599

Sum of electronic and thermal Free Energies= -1948.891283

Cartesian coordinates

|   |           |           |           |
|---|-----------|-----------|-----------|
| C | -0.207809 | -0.201627 | -1.186903 |
| C | -0.636944 | 1.154493  | -0.841167 |
| C | -0.442653 | 1.796925  | 0.337126  |
| O | -0.521068 | -0.443515 | -2.565462 |
| C | -0.932735 | 3.162601  | 0.644901  |
| C | -1.250041 | 3.510343  | 1.963255  |
| C | -1.114228 | 4.113051  | -0.367263 |
| C | -1.751950 | 4.773876  | 2.261196  |
| H | -1.108385 | 2.784050  | 2.759239  |
| C | -1.618070 | 5.372915  | -0.066875 |
| H | -0.843704 | 3.874541  | -1.391289 |
| C | -1.941914 | 5.708541  | 1.247071  |
| H | -1.995625 | 5.025144  | 3.288387  |
| H | -1.749735 | 6.100186  | -0.861349 |
| H | -2.332749 | 6.694045  | 1.477430  |



|   |           |           |           |
|---|-----------|-----------|-----------|
| C | 0.204650  | 1.079941  | 1.397245  |
| N | 0.755013  | 0.512619  | 2.247709  |
| H | -1.091417 | 1.712723  | -1.659589 |
| H | 1.276835  | -0.020573 | -0.895811 |
| C | -0.869663 | -1.311871 | -0.436513 |
| C | -2.342992 | -2.870550 | 0.042104  |
| C | -3.261831 | -0.925864 | -1.209237 |
| H | -2.814376 | -0.462414 | -2.095190 |
| N | -1.213461 | -3.315108 | 0.515236  |
| N | -0.312255 | -2.340485 | 0.210080  |
| N | -2.182039 | -1.640168 | -0.523577 |
| C | -3.646555 | -3.606266 | -0.075631 |
| H | -3.929505 | -4.036709 | 0.886126  |
| H | -3.507635 | -4.421722 | -0.799266 |
| C | -4.358065 | -1.938280 | -1.612659 |
| O | -4.675256 | -2.735251 | -0.477578 |
| C | -5.381701 | 0.046824  | -0.833427 |
| C | -4.056761 | 0.072289  | -0.386968 |
| C | -3.663049 | 0.918285  | 0.637915  |
| C | -4.606553 | 1.791930  | 1.182529  |
| C | -5.917272 | 1.801568  | 0.709702  |
| C | -6.318051 | 0.917844  | -0.294741 |
| C | -5.571688 | -1.043301 | -1.865856 |
| H | -2.652613 | 0.895502  | 1.027378  |
| H | -6.639492 | 2.486891  | 1.141254  |
| H | -7.349250 | 0.899511  | -0.634070 |
| H | -5.538606 | -0.646871 | -2.886669 |
| H | -6.501037 | -1.603544 | -1.743656 |
| C | 1.063977  | -2.541177 | 0.582517  |
| C | 2.017703  | -2.786910 | -0.411565 |
| C | 1.361471  | -2.578504 | 1.950270  |
| C | 3.328727  | -3.015330 | 0.003955  |
| C | 2.691147  | -2.800446 | 2.307762  |
| C | 3.686868  | -3.010773 | 1.352232  |
| H | 4.089874  | -3.198801 | -0.750765 |
| H | 2.950055  | -2.816467 | 3.363076  |
| C | 0.295896  | -2.441465 | 3.004343  |
| H | -0.183221 | -3.409587 | 3.179153  |
| H | -0.477343 | -1.729593 | 2.711197  |
| H | 0.737245  | -2.096297 | 3.940238  |
| C | 5.123311  | -3.212589 | 1.754968  |
| H | 5.218219  | -3.360840 | 2.832038  |
| H | 5.721303  | -2.338099 | 1.477958  |
| H | 5.555308  | -4.077728 | 1.245551  |

|   |           |           |           |
|---|-----------|-----------|-----------|
| C | 1.695374  | -2.806533 | -1.882495 |
| H | 2.019980  | -1.868052 | -2.349240 |
| H | 0.631347  | -2.953194 | -2.079952 |
| H | 2.242934  | -3.612990 | -2.373984 |
| H | -4.064125 | -2.568375 | -2.460963 |
| H | -4.310636 | 2.464656  | 1.981291  |
| C | 3.243445  | 0.202080  | 0.212897  |
| C | 4.525628  | 0.694402  | 0.225930  |
| C | 5.004234  | 1.450326  | -0.878282 |
| C | 4.092510  | 1.660853  | -1.950199 |
| C | 2.831063  | 1.127128  | -1.874864 |
| H | 2.839404  | -0.359437 | 1.050099  |
| H | 5.145586  | 0.503062  | 1.090966  |
| H | 4.367838  | 2.234169  | -2.824216 |
| H | 2.103427  | 1.269873  | -2.669912 |
| C | 6.703232  | 2.734920  | -2.046334 |
| C | 7.160448  | 1.701744  | 0.208354  |
| H | 6.079287  | 3.624655  | -2.178308 |
| H | 7.727257  | 3.057421  | -1.870987 |
| H | 6.679180  | 2.145200  | -2.968445 |
| H | 6.770481  | 2.131883  | 1.136581  |
| H | 7.319595  | 0.628508  | 0.356343  |
| H | 8.120672  | 2.164233  | -0.009008 |
| N | 6.254908  | 1.946545  | -0.906211 |
| N | 2.411196  | 0.405126  | -0.821824 |
| H | 0.235705  | -0.872882 | -2.978980 |

Vibrational frequencies

|           |          |          |
|-----------|----------|----------|
| -908.1066 | 11.7879  | 17.9574  |
| 23.8048   | 31.8677  | 38.6931  |
| 44.5559   | 51.6893  | 54.1134  |
| 60.6506   | 66.0775  | 72.1799  |
| 84.1878   | 87.6482  | 92.9541  |
| 96.3617   | 110.5502 | 114.2340 |
| 116.5191  | 121.4064 | 130.2789 |
| 142.6629  | 150.1770 | 160.9770 |
| 170.5466  | 178.9615 | 189.0515 |
| 198.1286  | 199.0826 | 206.0623 |
| 214.4081  | 221.6551 | 225.9428 |
| 245.5974  | 246.5782 | 267.2326 |
| 268.7750  | 281.1960 | 286.3211 |
| 288.3965  | 295.1787 | 301.3154 |
| 321.0504  | 327.6363 | 339.7865 |
| 342.5788  | 365.3271 | 382.2226 |
| 392.4917  | 412.4101 | 415.3638 |

|           |           |           |
|-----------|-----------|-----------|
| 416.9393  | 440.7721  | 444.2791  |
| 459.4080  | 478.9016  | 484.6952  |
| 491.1702  | 497.1711  | 503.9412  |
| 507.9972  | 523.8007  | 529.2502  |
| 545.0705  | 548.0301  | 557.8999  |
| 576.3727  | 581.2184  | 589.9589  |
| 592.7874  | 622.6124  | 626.3898  |
| 640.8427  | 655.5629  | 663.6545  |
| 668.9475  | 679.7820  | 710.2215  |
| 714.9943  | 726.8183  | 730.7434  |
| 743.9348  | 749.8093  | 757.3893  |
| 769.0711  | 782.5657  | 795.0745  |
| 797.2987  | 816.1734  | 830.0226  |
| 841.1192  | 844.6246  | 856.5677  |
| 876.4754  | 878.7264  | 882.6478  |
| 891.1405  | 903.7453  | 923.7083  |
| 926.5079  | 946.0852  | 956.9667  |
| 958.4437  | 970.0319  | 977.0970  |
| 983.4387  | 984.1245  | 985.8971  |
| 996.1202  | 1008.0607 | 1011.6533 |
| 1016.2086 | 1019.6670 | 1022.7684 |
| 1030.4693 | 1039.1883 | 1041.2881 |
| 1049.6251 | 1050.3213 | 1059.1773 |
| 1063.5832 | 1063.9962 | 1066.7226 |
| 1068.7265 | 1071.2414 | 1074.9546 |
| 1077.4550 | 1090.8122 | 1092.2951 |
| 1113.7952 | 1126.1498 | 1133.5880 |
| 1139.0239 | 1146.4360 | 1149.0174 |
| 1170.5776 | 1177.7051 | 1181.3253 |
| 1183.3993 | 1186.4322 | 1193.4474 |
| 1212.1349 | 1213.3733 | 1217.2622 |
| 1220.5802 | 1241.2093 | 1256.0925 |
| 1257.8955 | 1266.1412 | 1279.0678 |
| 1281.7241 | 1289.1086 | 1291.0112 |
| 1305.7642 | 1310.2292 | 1318.1368 |
| 1326.6855 | 1334.0781 | 1344.5394 |
| 1346.6262 | 1359.6647 | 1361.7063 |
| 1366.1400 | 1370.3080 | 1377.9475 |
| 1381.3148 | 1386.4281 | 1389.4742 |
| 1406.4531 | 1413.8211 | 1419.9648 |
| 1425.8750 | 1429.6404 | 1448.0634 |
| 1449.4164 | 1452.9265 | 1467.0414 |
| 1468.6776 | 1480.6601 | 1490.1574 |
| 1491.5080 | 1493.5008 | 1493.6323 |

|           |           |           |
|-----------|-----------|-----------|
| 1496.6941 | 1500.7197 | 1501.4856 |
| 1502.6542 | 1504.1234 | 1505.0182 |
| 1515.7611 | 1519.3131 | 1521.4058 |
| 1523.7309 | 1533.8821 | 1537.3414 |
| 1539.4920 | 1555.1083 | 1576.9729 |
| 1598.8088 | 1616.8802 | 1662.0201 |
| 1667.6418 | 1683.6372 | 1683.8622 |
| 1693.1436 | 1693.7469 | 1696.4527 |
| 1699.0866 | 1708.1062 | 1717.8516 |
| 2385.0506 | 3062.6102 | 3063.5145 |
| 3063.9990 | 3069.0678 | 3073.2913 |
| 3082.7266 | 3085.3242 | 3102.3443 |
| 3119.9728 | 3131.2505 | 3134.7100 |
| 3142.6891 | 3143.4225 | 3150.5016 |
| 3159.7711 | 3170.3751 | 3172.0381 |
| 3174.8419 | 3181.7690 | 3187.4928 |
| 3194.0068 | 3202.9278 | 3203.3684 |
| 3207.7325 | 3208.1510 | 3212.5670 |
| 3214.9398 | 3216.3228 | 3220.5074 |
| 3220.9096 | 3233.3179 | 3237.2100 |
| 3239.7048 | 3242.7291 | 3252.0300 |
| 3262.1995 | 3288.0462 | 3896.1782 |

## Si-TS2

Zero-point correction= 0.705989

Thermal correction to Energy= 0.746981

Thermal correction to Enthalpy= 0.747925

Thermal correction to Gibbs Free Energy= 0.632745

Sum of electronic and zero-point Energies= -1948.822870

Sum of electronic and thermal Energies= -1948.781878

Sum of electronic and thermal Enthalpies= -1948.780934

Sum of electronic and thermal Free Energies= -1948.896114

Cartesian coordinates

|   |           |          |           |
|---|-----------|----------|-----------|
| H | -0.592990 | 0.748351 | -0.989045 |
| C | -2.676636 | 1.236441 | -1.672783 |
| C | -3.892130 | 1.812159 | -1.408245 |
| C | -3.987581 | 2.806033 | -0.397193 |
| C | -2.766545 | 3.212210 | 0.206538  |
| C | -1.599585 | 2.569920 | -0.122780 |
| H | -2.591510 | 0.454695 | -2.420977 |
| H | -4.760365 | 1.474344 | -1.956648 |
| H | -2.737191 | 3.990612 | 0.956627  |
| H | -0.669497 | 2.819137 | 0.376593  |
| C | -5.229032 | 4.292683 | 1.062345  |

|   |           |           |           |
|---|-----------|-----------|-----------|
| C | -6.403077 | 2.812914  | -0.609250 |
| H | -4.664821 | 5.196048  | 0.812544  |
| H | -6.266658 | 4.572392  | 1.230898  |
| H | -4.826427 | 3.867943  | 1.988614  |
| H | -6.437865 | 3.006947  | -1.685781 |
| H | -6.496512 | 1.734550  | -0.438863 |
| H | -7.249126 | 3.313626  | -0.143581 |
| N | -5.170709 | 3.323032  | -0.023253 |
| N | -1.540140 | 1.581232  | -1.035815 |
| C | 0.445742  | -0.226027 | -1.273669 |
| C | 1.663068  | 0.599614  | -1.282710 |
| C | 2.166760  | 1.304570  | -0.241746 |
| O | 0.041098  | -0.603532 | -2.597364 |
| C | 3.408645  | 2.109961  | -0.261389 |
| C | 3.691245  | 2.992351  | 0.787771  |
| C | 4.324904  | 2.005957  | -1.317246 |
| C | 4.844800  | 3.770723  | 0.770551  |
| H | 3.001647  | 3.075262  | 1.623091  |
| C | 5.470427  | 2.792525  | -1.337734 |
| H | 4.161060  | 1.289293  | -2.115531 |
| C | 5.735352  | 3.681007  | -0.295828 |
| H | 5.043934  | 4.450823  | 1.592202  |
| H | 6.168241  | 2.698843  | -2.163565 |
| H | 6.634398  | 4.287978  | -0.310439 |
| C | 1.420930  | 1.255275  | 0.985732  |
| N | 0.755265  | 1.245272  | 1.936857  |
| H | 2.138609  | 0.707460  | -2.257075 |
| C | 0.417781  | -1.459580 | -0.473231 |
| C | -0.295609 | -3.374163 | 0.354277  |
| C | -2.041796 | -2.034172 | -0.770882 |
| H | -2.004132 | -1.560368 | -1.755987 |
| N | 0.949042  | -3.299300 | 0.718622  |
| N | 1.385031  | -2.115890 | 0.191242  |
| N | -0.665270 | -2.268321 | -0.356589 |
| C | -1.245921 | -4.527778 | 0.499785  |
| H | -1.149379 | -4.971807 | 1.490867  |
| H | -0.978758 | -5.283447 | -0.252618 |
| C | -2.815928 | -3.366810 | -0.850533 |
| O | -2.580716 | -4.104763 | 0.341494  |
| C | -4.201821 | -1.702236 | 0.118746  |
| C | -2.882786 | -1.254612 | 0.219438  |
| C | -2.515278 | -0.270835 | 1.123361  |
| C | -3.519167 | 0.335490  | 1.880975  |
| C | -4.850790 | -0.052225 | 1.732020  |

|   |           |           |           |
|---|-----------|-----------|-----------|
| C | -5.200960 | -1.088060 | 0.861429  |
| C | -4.276337 | -2.901463 | -0.803614 |
| H | -1.476354 | 0.028450  | 1.245059  |
| H | -5.620112 | 0.433320  | 2.324648  |
| H | -6.230923 | -1.425203 | 0.792547  |
| H | -4.611612 | -2.626269 | -1.810036 |
| H | -4.926135 | -3.696185 | -0.431134 |
| C | 2.760044  | -1.734259 | 0.340047  |
| C | 3.570181  | -1.749926 | -0.798147 |
| C | 3.202555  | -1.319032 | 1.597968  |
| C | 4.858344  | -1.236186 | -0.664966 |
| C | 4.498488  | -0.809265 | 1.672739  |
| C | 5.323590  | -0.729372 | 0.550407  |
| H | 5.508989  | -1.218821 | -1.535624 |
| H | 4.864799  | -0.449092 | 2.630973  |
| C | 2.339885  | -1.438069 | 2.826134  |
| H | 2.402397  | -2.452651 | 3.231601  |
| H | 1.290058  | -1.228274 | 2.612060  |
| H | 2.676048  | -0.739422 | 3.594102  |
| C | 6.673739  | -0.072989 | 0.648880  |
| H | 6.550211  | 1.014696  | 0.700066  |
| H | 7.291822  | -0.300113 | -0.222139 |
| H | 7.205794  | -0.391608 | 1.548780  |
| C | 3.074422  | -2.306792 | -2.108462 |
| H | 2.275439  | -1.700315 | -2.548491 |
| H | 2.673851  | -3.316020 | -1.969947 |
| H | 3.892598  | -2.360071 | -2.828233 |
| H | -2.553792 | -3.961938 | -1.733542 |
| H | -3.257509 | 1.114280  | 2.590511  |
| H | -0.293343 | 0.190849  | -3.035429 |

Vibrational frequencies

|            |          |          |
|------------|----------|----------|
| -1272.8187 | 19.2684  | 22.4348  |
| 31.0333    | 34.7149  | 36.6891  |
| 42.1988    | 61.2374  | 64.9571  |
| 71.0923    | 77.4618  | 80.8732  |
| 88.5352    | 93.5941  | 108.7728 |
| 110.8419   | 116.6277 | 120.8874 |
| 125.2455   | 130.1822 | 137.7917 |
| 144.4242   | 150.3946 | 152.4854 |
| 160.6469   | 166.7220 | 183.7539 |
| 190.8071   | 200.3810 | 204.1633 |
| 214.5002   | 227.3790 | 231.3013 |
| 250.2881   | 260.7272 | 267.3246 |
| 268.5673   | 289.5107 | 294.2616 |

|           |           |           |
|-----------|-----------|-----------|
| 306.3330  | 308.8606  | 321.1212  |
| 333.2177  | 336.7103  | 344.3908  |
| 355.1561  | 375.9080  | 381.9386  |
| 401.9386  | 405.0135  | 414.6540  |
| 416.5163  | 428.9982  | 446.5122  |
| 449.8837  | 475.4102  | 486.1592  |
| 492.7430  | 500.7885  | 504.3547  |
| 508.7947  | 516.2905  | 529.9256  |
| 536.7889  | 549.9122  | 557.0394  |
| 578.7587  | 583.1976  | 587.0140  |
| 590.6661  | 628.0932  | 631.9759  |
| 635.3651  | 650.2756  | 662.6795  |
| 666.2243  | 685.9869  | 697.2516  |
| 712.1607  | 725.9533  | 731.7856  |
| 742.8160  | 747.2808  | 762.9604  |
| 770.2707  | 774.7255  | 787.2674  |
| 804.6217  | 807.8469  | 817.1710  |
| 831.8936  | 836.0768  | 841.3766  |
| 865.5406  | 878.0988  | 888.9901  |
| 894.6052  | 908.1222  | 925.9501  |
| 928.8493  | 944.9731  | 958.7225  |
| 960.8538  | 966.6268  | 977.4567  |
| 981.8184  | 986.3570  | 987.6355  |
| 994.5013  | 997.1394  | 1011.0850 |
| 1014.8514 | 1017.9605 | 1020.5797 |
| 1024.8265 | 1036.0969 | 1038.5081 |
| 1044.8280 | 1046.5272 | 1060.3744 |
| 1062.6335 | 1063.6347 | 1064.8091 |
| 1068.0826 | 1070.0485 | 1075.2955 |
| 1078.0886 | 1095.1896 | 1095.7573 |
| 1112.1917 | 1113.4985 | 1132.3152 |
| 1140.7923 | 1151.0679 | 1158.1778 |
| 1160.2321 | 1174.9420 | 1177.2188 |
| 1185.6273 | 1188.7210 | 1196.1827 |
| 1205.4534 | 1216.3441 | 1218.1384 |
| 1223.9233 | 1236.9027 | 1250.5392 |
| 1252.6396 | 1269.9716 | 1284.3088 |
| 1286.1462 | 1288.5260 | 1299.5885 |
| 1305.8763 | 1310.7681 | 1317.0615 |
| 1325.4337 | 1330.2338 | 1342.3319 |
| 1347.8255 | 1355.5102 | 1361.6144 |
| 1368.8502 | 1372.5920 | 1373.8078 |
| 1378.9874 | 1380.8683 | 1383.9559 |
| 1410.2461 | 1413.4202 | 1419.3533 |

|           |           |           |
|-----------|-----------|-----------|
| 1424.5921 | 1433.4760 | 1448.0134 |
| 1454.8035 | 1461.7971 | 1464.8179 |
| 1472.5712 | 1486.0462 | 1490.0191 |
| 1491.9849 | 1493.9170 | 1494.9220 |
| 1495.7002 | 1496.9943 | 1503.8995 |
| 1504.7596 | 1505.7223 | 1507.1342 |
| 1514.4804 | 1521.2668 | 1524.3697 |
| 1526.0578 | 1533.6823 | 1537.8984 |
| 1548.2466 | 1557.0802 | 1571.9628 |
| 1593.7597 | 1614.4122 | 1664.8424 |
| 1674.5154 | 1678.7341 | 1682.1776 |
| 1688.0337 | 1695.7636 | 1696.2800 |
| 1703.7579 | 1706.5534 | 1712.3638 |
| 2384.6238 | 3058.9343 | 3066.7850 |
| 3066.9666 | 3068.6854 | 3070.8041 |
| 3078.9243 | 3083.5358 | 3103.3438 |
| 3127.6317 | 3135.4189 | 3138.8817 |
| 3140.5170 | 3144.8231 | 3150.1908 |
| 3154.4396 | 3169.2356 | 3169.5528 |
| 3179.4259 | 3180.8619 | 3188.3625 |
| 3194.3336 | 3195.0506 | 3201.5978 |
| 3201.9358 | 3207.4448 | 3208.6699 |
| 3209.4640 | 3209.4931 | 3212.6694 |
| 3218.5117 | 3221.5175 | 3226.3426 |
| 3231.7748 | 3236.2189 | 3241.8405 |
| 3257.1782 | 3269.8656 | 3843.3643 |

### **Si-TS2<sup>b</sup>**

Zero-point correction= 0.691407

Thermal correction to Energy= 0.732222

Thermal correction to Enthalpy= 0.733166

Thermal correction to Gibbs Free Energy= 0.617132

Sum of electronic and zero-point Energies= -1948.340665

Sum of electronic and thermal Energies= -1948.299849

Sum of electronic and thermal Enthalpies= -1948.298905

Sum of electronic and thermal Free Energies= -1948.414939

Cartesian coordinates

|   |           |          |           |
|---|-----------|----------|-----------|
| H | -0.729390 | 0.550157 | -0.504406 |
| C | -2.387281 | 1.667586 | -1.522759 |
| C | -3.414361 | 2.582819 | -1.605074 |
| C | -3.794446 | 3.316119 | -0.452981 |
| C | -3.065788 | 3.054200 | 0.735870  |
| C | -2.059337 | 2.114679 | 0.722051  |
| H | -2.033460 | 1.083074 | -2.367712 |



|   |           |           |           |
|---|-----------|-----------|-----------|
| H | -3.909349 | 2.727679  | -2.555622 |
| H | -3.282239 | 3.575921  | 1.658221  |
| H | -1.486740 | 1.887694  | 1.618844  |
| C | -5.145686 | 4.969534  | 0.712622  |
| C | -5.512169 | 4.469234  | -1.728699 |
| H | -4.300028 | 5.569936  | 1.065868  |
| H | -5.971142 | 5.641005  | 0.484267  |
| H | -5.460325 | 4.300255  | 1.520684  |
| H | -4.839543 | 4.851852  | -2.504401 |
| H | -5.988393 | 3.555409  | -2.099724 |
| H | -6.288173 | 5.211216  | -1.551023 |
| N | -4.799810 | 4.221891  | -0.485680 |
| N | -1.724694 | 1.429127  | -0.379216 |
| C | 0.240193  | -0.212591 | -1.160338 |
| C | 1.287972  | 0.780124  | -1.007351 |
| C | 1.786048  | 1.316027  | 0.156924  |
| O | -0.312930 | -0.406046 | -2.384134 |
| C | 2.883038  | 2.296659  | 0.235612  |
| C | 3.132977  | 3.001255  | 1.423250  |
| C | 3.716967  | 2.547076  | -0.866290 |
| C | 4.159694  | 3.935552  | 1.500633  |
| H | 2.511307  | 2.812873  | 2.294470  |
| C | 4.731014  | 3.495759  | -0.791684 |
| H | 3.588441  | 1.975735  | -1.779990 |
| C | 4.962024  | 4.196239  | 0.391678  |
| H | 4.330361  | 4.465303  | 2.432859  |
| H | 5.358012  | 3.674982  | -1.660270 |
| H | 5.762232  | 4.926654  | 0.451299  |
| C | 1.167608  | 0.902472  | 1.371445  |
| N | 0.589140  | 0.597172  | 2.336414  |
| H | 1.589638  | 1.247572  | -1.946559 |
| C | 0.440554  | -1.512498 | -0.480387 |
| C | 0.031003  | -3.624439 | 0.011330  |
| C | -1.940364 | -2.305428 | -0.738486 |
| H | -1.966085 | -1.624775 | -1.600837 |
| N | 1.298956  | -3.475908 | 0.255100  |
| N | 1.542043  | -2.160341 | -0.055105 |
| N | -0.531004 | -2.457277 | -0.413180 |
| C | -0.774391 | -4.890883 | -0.013103 |
| H | -0.568534 | -5.492783 | 0.873039  |
| H | -0.478746 | -5.464934 | -0.903201 |
| C | -2.555236 | -3.687075 | -1.043124 |
| O | -2.154749 | -4.608501 | -0.030607 |
| C | -4.055564 | -2.461599 | 0.315511  |

|   |           |           |           |
|---|-----------|-----------|-----------|
| C | -2.809946 | -1.835691 | 0.409225  |
| C | -2.511047 | -0.974720 | 1.452732  |
| C | -3.509862 | -0.697493 | 2.389130  |
| C | -4.769769 | -1.284103 | 2.276808  |
| C | -5.049310 | -2.180886 | 1.242161  |
| C | -4.053665 | -3.451322 | -0.830185 |
| H | -1.518831 | -0.541233 | 1.555276  |
| H | -5.533709 | -1.062580 | 3.015475  |
| H | -6.018176 | -2.667936 | 1.181174  |
| H | -4.497206 | -3.024853 | -1.736905 |
| H | -4.568549 | -4.387122 | -0.601440 |
| C | 2.882544  | -1.657845 | -0.066189 |
| C | 3.457976  | -1.362210 | -1.307061 |
| C | 3.529473  | -1.439130 | 1.150270  |
| C | 4.709245  | -0.750759 | -1.294014 |
| C | 4.784311  | -0.829398 | 1.105632  |
| C | 5.372714  | -0.453292 | -0.100258 |
| H | 5.179093  | -0.497209 | -2.241749 |
| H | 5.303954  | -0.630973 | 2.039902  |
| C | 2.916508  | -1.869614 | 2.456211  |
| H | 3.044078  | -2.947377 | 2.598733  |
| H | 1.846585  | -1.653656 | 2.488007  |
| H | 3.397022  | -1.354228 | 3.289939  |
| C | 6.680472  | 0.291802  | -0.117397 |
| H | 6.490307  | 1.370924  | -0.091218 |
| H | 7.249922  | 0.075482  | -1.024536 |
| H | 7.294961  | 0.038155  | 0.749391  |
| C | 2.769602  | -1.719589 | -2.600606 |
| H | 1.798731  | -1.224254 | -2.732272 |
| H | 2.584415  | -2.799215 | -2.638124 |
| H | 3.409377  | -1.459981 | -3.446401 |
| H | -2.285756 | -4.067513 | -2.036259 |
| H | -3.297316 | -0.026929 | 3.216120  |

Vibrational frequencies

|            |          |          |
|------------|----------|----------|
| -1476.9560 | 12.7408  | 21.4244  |
| 27.3399    | 31.7245  | 38.5639  |
| 48.4534    | 54.3544  | 61.0659  |
| 65.5776    | 73.1014  | 74.1227  |
| 80.3581    | 90.4039  | 101.5383 |
| 103.3350   | 108.4957 | 111.6646 |
| 117.9524   | 120.0333 | 130.1215 |
| 138.3560   | 148.8986 | 155.7367 |
| 165.8048   | 179.9735 | 193.5042 |
| 199.4453   | 202.9461 | 211.3630 |

|           |           |           |
|-----------|-----------|-----------|
| 215.6764  | 225.3160  | 228.3930  |
| 244.8564  | 254.9472  | 261.1273  |
| 270.8001  | 288.1095  | 289.5758  |
| 294.8881  | 304.6474  | 326.7410  |
| 332.6874  | 336.7456  | 349.8067  |
| 366.3386  | 382.3931  | 403.6320  |
| 406.1420  | 414.9126  | 417.1127  |
| 432.9808  | 443.1443  | 448.2239  |
| 471.9346  | 485.9105  | 489.1306  |
| 501.4050  | 507.6265  | 513.1637  |
| 523.9229  | 531.9534  | 549.7010  |
| 551.4857  | 558.3133  | 577.1055  |
| 584.3316  | 588.1610  | 591.8151  |
| 625.7144  | 628.0320  | 636.3578  |
| 641.2017  | 648.4260  | 669.4479  |
| 678.3608  | 689.1841  | 708.4653  |
| 719.5325  | 732.8813  | 746.5368  |
| 749.4870  | 760.4306  | 766.2944  |
| 772.6168  | 783.0252  | 802.5623  |
| 810.1794  | 815.7224  | 840.7876  |
| 849.3791  | 857.2715  | 863.9784  |
| 875.4091  | 880.1952  | 885.6348  |
| 906.7274  | 913.1872  | 922.0572  |
| 924.3105  | 944.0601  | 961.0071  |
| 968.8396  | 982.7952  | 985.7714  |
| 988.0992  | 991.4390  | 993.3329  |
| 1009.3574 | 1014.2566 | 1016.5683 |
| 1019.4322 | 1025.1693 | 1031.4908 |
| 1041.3419 | 1043.6813 | 1046.9363 |
| 1053.5697 | 1058.8131 | 1062.0648 |
| 1064.3374 | 1069.6162 | 1070.6201 |
| 1070.9966 | 1073.6709 | 1077.5934 |
| 1092.0052 | 1111.2461 | 1113.7770 |
| 1116.1268 | 1119.9925 | 1141.3183 |
| 1144.7622 | 1145.7349 | 1154.3758 |
| 1169.1114 | 1175.4110 | 1183.2829 |
| 1190.7819 | 1200.3682 | 1207.0718 |
| 1211.3512 | 1212.2483 | 1223.0493 |
| 1237.9176 | 1251.3913 | 1254.7165 |
| 1279.4772 | 1281.1003 | 1282.7193 |
| 1288.6153 | 1298.7734 | 1307.6761 |
| 1312.9947 | 1319.1726 | 1327.4986 |
| 1336.4502 | 1341.7853 | 1348.3987 |
| 1355.7024 | 1358.4313 | 1361.9040 |

|           |           |           |
|-----------|-----------|-----------|
| 1364.8477 | 1376.7475 | 1380.4105 |
| 1381.3809 | 1402.3735 | 1407.6698 |
| 1418.0974 | 1425.0495 | 1435.7730 |
| 1444.5798 | 1451.8441 | 1459.3728 |
| 1467.8627 | 1473.1489 | 1475.4246 |
| 1486.3610 | 1489.9321 | 1491.5875 |
| 1493.6785 | 1494.7091 | 1495.2616 |
| 1497.6741 | 1498.0927 | 1501.6482 |
| 1502.6279 | 1510.9403 | 1516.9229 |
| 1517.8797 | 1524.6013 | 1530.6918 |
| 1536.7619 | 1539.6864 | 1547.5849 |
| 1559.1906 | 1559.6455 | 1595.7366 |
| 1633.0464 | 1638.3370 | 1663.7000 |
| 1678.2799 | 1682.6654 | 1688.4620 |
| 1689.7076 | 1697.2732 | 1705.6581 |
| 1710.8827 | 2328.1496 | 3048.5945 |
| 3053.8944 | 3054.0883 | 3060.5297 |
| 3062.8496 | 3078.3153 | 3080.7236 |
| 3084.0138 | 3100.0516 | 3113.1391 |
| 3119.2539 | 3120.2443 | 3137.8534 |
| 3145.7847 | 3152.6817 | 3157.1436 |
| 3158.6232 | 3167.0909 | 3167.6144 |
| 3179.6529 | 3184.3164 | 3188.2103 |
| 3192.4118 | 3193.2402 | 3197.2002 |
| 3199.2414 | 3200.2895 | 3206.7858 |
| 3208.3602 | 3210.2921 | 3212.6133 |
| 3217.9357 | 3223.7885 | 3224.2707 |
| 3233.3718 | 3260.7666 | 3266.6524 |

### ***Si-TS2<sup>c</sup>***

Zero-point correction= 0.527205

Thermal correction to Energy= 0.558323

Thermal correction to Enthalpy= 0.559267

Thermal correction to Gibbs Free Energy= 0.465043

Sum of electronic and zero-point Energies= -1566.358425

Sum of electronic and thermal Energies= -1566.327307

Sum of electronic and thermal Enthalpies= -1566.326363

Sum of electronic and thermal Free Energies= -1566.420587

Cartesian coordinates

|   |           |          |           |
|---|-----------|----------|-----------|
| C | -0.297966 | 0.333729 | -1.413002 |
| C | 1.064724  | 0.830224 | -1.371393 |
| C | 1.717638  | 1.367695 | -0.306662 |
| O | -0.869584 | 0.098889 | -2.742280 |
| C | 3.141291  | 1.764481 | -0.301812 |

|   |           |           |           |
|---|-----------|-----------|-----------|
| C | 3.629094  | 2.664616  | 0.654714  |
| C | 4.034634  | 1.243835  | -1.249045 |
| C | 4.965601  | 3.049749  | 0.651842  |
| H | 2.952801  | 3.068943  | 1.402760  |
| C | 5.366852  | 1.642604  | -1.258793 |
| H | 3.691890  | 0.502081  | -1.963344 |
| C | 5.840300  | 2.545663  | -0.307967 |
| H | 5.323179  | 3.749755  | 1.400189  |
| H | 6.042746  | 1.231295  | -2.002250 |
| H | 6.882797  | 2.846528  | -0.310792 |
| C | 0.956374  | 1.591895  | 0.887020  |
| N | 0.308837  | 1.811264  | 1.826249  |
| H | 1.575752  | 0.806130  | -2.333958 |
| H | -1.114934 | 1.056693  | -1.855467 |
| C | -0.780844 | -0.635617 | -0.441678 |
| C | -2.147936 | -1.973984 | 0.642348  |
| C | -3.260803 | -0.330859 | -0.877352 |
| H | -3.022905 | -0.227983 | -1.941461 |
| N | -0.962205 | -2.329694 | 1.036262  |
| N | -0.118520 | -1.499305 | 0.347443  |
| N | -2.088129 | -0.944368 | -0.253958 |
| C | -3.468847 | -2.598831 | 0.975912  |
| H | -3.513278 | -2.839972 | 2.038525  |
| H | -3.576992 | -3.527660 | 0.397497  |
| C | -4.496888 | -1.233872 | -0.656713 |
| O | -4.511754 | -1.697454 | 0.688186  |
| C | -5.101337 | 1.027992  | -0.263188 |
| C | -3.705052 | 0.986560  | -0.271086 |
| C | -2.949532 | 2.044738  | 0.216119  |
| C | -3.620455 | 3.166932  | 0.705860  |
| C | -5.013450 | 3.221169  | 0.699475  |
| C | -5.765373 | 2.148727  | 0.216516  |
| C | -5.673188 | -0.265593 | -0.797760 |
| H | -1.865096 | 2.001809  | 0.235160  |
| H | -5.518541 | 4.100166  | 1.087064  |
| H | -6.850558 | 2.183956  | 0.232806  |
| H | -5.957210 | -0.171249 | -1.851616 |
| H | -6.539833 | -0.627999 | -0.240234 |
| C | 1.299664  | -1.699737 | 0.386416  |
| C | 1.934525  | -2.073079 | -0.805119 |
| C | 1.983413  | -1.477166 | 1.582787  |
| C | 3.324971  | -2.142423 | -0.786281 |
| C | 3.376677  | -1.561708 | 1.543080  |
| C | 4.062175  | -1.863413 | 0.368196  |

|   |           |           |           |
|---|-----------|-----------|-----------|
| H | 3.848345  | -2.422485 | -1.697603 |
| H | 3.936127  | -1.375181 | 2.456329  |
| C | 1.263051  | -1.194585 | 2.874345  |
| H | 0.884551  | -2.125700 | 3.306999  |
| H | 0.413776  | -0.525114 | 2.727347  |
| H | 1.944081  | -0.734544 | 3.592716  |
| C | 5.566746  | -1.864150 | 0.331516  |
| H | 5.929772  | -0.880141 | 0.013471  |
| H | 5.946963  | -2.603696 | -0.377150 |
| H | 5.989291  | -2.073924 | 1.316504  |
| C | 1.153356  | -2.420272 | -2.049094 |
| H | 0.657683  | -1.559499 | -2.515950 |
| H | 0.368910  | -3.147966 | -1.814265 |
| H | 1.818696  | -2.870102 | -2.788192 |
| H | -4.524439 | -2.083571 | -1.350214 |
| H | -3.049247 | 4.000751  | 1.100717  |

Vibrational frequencies

|            |          |          |
|------------|----------|----------|
| -1771.5814 | 17.7368  | 26.5961  |
| 33.9273    | 40.1003  | 54.2956  |
| 57.1079    | 75.0529  | 83.5868  |
| 90.0062    | 102.0964 | 110.9305 |
| 115.7538   | 118.3606 | 127.8703 |
| 154.4178   | 156.5856 | 166.5997 |
| 185.5181   | 192.5984 | 205.5116 |
| 211.3766   | 215.1996 | 235.9828 |
| 250.9759   | 256.1233 | 287.3960 |
| 293.1974   | 300.7689 | 311.9880 |
| 319.3159   | 335.0667 | 342.5359 |
| 361.0150   | 377.7988 | 396.2372 |
| 406.5328   | 419.0725 | 430.5966 |
| 438.4642   | 459.0883 | 477.7816 |
| 494.5223   | 497.8516 | 508.4723 |
| 517.0863   | 529.3097 | 553.8820 |
| 560.7345   | 582.5321 | 584.1941 |
| 590.5766   | 616.1956 | 626.4424 |
| 630.3143   | 644.1791 | 652.3538 |
| 669.8722   | 684.5862 | 702.4074 |
| 717.1500   | 729.1358 | 744.9384 |
| 757.1731   | 759.5981 | 761.8192 |
| 789.4270   | 797.7545 | 810.1842 |
| 842.1925   | 868.5580 | 877.7370 |
| 878.7015   | 883.6790 | 896.9894 |
| 909.7968   | 917.5036 | 924.1233 |
| 940.6454   | 951.5717 | 957.6387 |

|           |           |           |
|-----------|-----------|-----------|
| 965.3544  | 981.3655  | 983.8630  |
| 1001.6199 | 1005.0294 | 1012.7017 |
| 1015.5791 | 1024.3241 | 1026.8739 |
| 1039.3815 | 1041.3400 | 1043.0646 |
| 1046.0014 | 1059.2763 | 1061.5453 |
| 1067.1942 | 1070.2437 | 1070.3959 |
| 1076.5300 | 1078.0820 | 1079.5290 |
| 1115.7158 | 1127.2888 | 1142.2270 |
| 1175.2361 | 1180.8923 | 1181.1738 |
| 1192.1704 | 1203.5062 | 1213.4040 |
| 1217.9042 | 1234.8295 | 1250.3453 |
| 1257.7378 | 1278.5266 | 1282.8299 |
| 1286.3065 | 1304.8785 | 1311.8988 |
| 1322.2432 | 1323.3879 | 1334.5532 |
| 1339.3452 | 1350.0322 | 1362.3912 |
| 1364.4423 | 1369.7396 | 1377.7579 |
| 1382.0179 | 1400.6874 | 1407.7897 |
| 1418.6934 | 1425.8765 | 1437.4897 |
| 1460.0737 | 1464.8257 | 1472.4805 |
| 1488.1754 | 1489.3198 | 1492.9880 |
| 1493.9096 | 1496.4707 | 1502.3290 |
| 1513.5774 | 1516.2215 | 1519.6421 |
| 1527.1556 | 1537.4945 | 1543.4518 |
| 1552.8325 | 1558.9123 | 1662.1784 |
| 1676.9162 | 1680.8275 | 1684.2663 |
| 1687.9136 | 1691.4058 | 1694.0549 |
| 1706.8046 | 2370.4436 | 2662.2425 |
| 3055.8921 | 3062.5885 | 3065.7613 |
| 3080.8685 | 3082.8300 | 3094.2251 |
| 3121.0908 | 3125.7353 | 3139.5245 |
| 3150.7427 | 3157.3648 | 3163.4778 |
| 3167.7112 | 3174.2884 | 3174.8307 |
| 3177.3151 | 3191.2885 | 3194.6313 |
| 3199.4016 | 3208.3274 | 3209.2512 |
| 3213.4171 | 3218.0493 | 3223.1754 |
| 3225.0378 | 3227.7214 | 3239.2998 |

Re-M2

Zero-point correction= 0.530760

Thermal correction to Energy= 0.562670

Thermal correction to Enthalpy= 0.563615

Thermal correction to Gibbs Free Energy= 0.466319

Sum of electronic and zero-point Energies= -1566.433670

Sum of electronic and thermal Energies= -1566.401760

Sum of electronic and thermal Enthalpies= -1566.400816

Sum of electronic and thermal Free Energies= -1566.498111

Cartesian coordinates

|   |           |           |           |
|---|-----------|-----------|-----------|
| C | 0.866131  | -1.074873 | 0.982235  |
| C | -0.261961 | -1.891776 | 1.025402  |
| C | -1.251430 | -2.023678 | 0.055224  |
| O | 1.961545  | -1.381237 | 1.786276  |
| C | -2.537983 | -2.690237 | 0.301837  |
| C | -3.312049 | -3.195196 | -0.756295 |
| C | -3.028744 | -2.841868 | 1.608885  |
| C | -4.513303 | -3.848792 | -0.512629 |
| H | -2.958691 | -3.077403 | -1.776922 |
| C | -4.224408 | -3.510900 | 1.849533  |
| H | -2.481427 | -2.410819 | 2.442023  |
| C | -4.974849 | -4.019492 | 0.792251  |
| H | -5.091100 | -4.232088 | -1.348166 |
| H | -4.580507 | -3.617305 | 2.869685  |
| H | -5.913531 | -4.529892 | 0.980394  |
| C | -0.935352 | -1.635587 | -1.271141 |
| N | -0.656837 | -1.369316 | -2.371493 |
| H | -0.330849 | -2.532110 | 1.906200  |
| C | 0.973512  | 0.158733  | 0.297442  |
| C | 0.687245  | 2.261593  | -0.315742 |
| C | -1.315375 | 1.270872  | 0.630174  |
| H | -1.539213 | 0.365768  | 1.201409  |
| N | 1.963592  | 2.075029  | -0.421949 |
| N | 2.133480  | 0.752475  | -0.081043 |
| N | 0.021129  | 1.123044  | 0.068398  |
| C | -0.085111 | 3.535108  | -0.257853 |
| H | -0.858997 | 3.568110  | -1.032207 |
| H | 0.590075  | 4.382013  | -0.378256 |
| C | -1.353330 | 2.503371  | 1.576024  |
| O | -0.643665 | 3.627628  | 1.050037  |
| C | -3.336955 | 2.462327  | 0.275008  |
| C | -2.438229 | 1.590433  | -0.347389 |
| C | -2.632030 | 1.178794  | -1.658909 |
| C | -3.768363 | 1.628025  | -2.334186 |
| C | -4.684915 | 2.470543  | -1.707147 |
| C | -4.470905 | 2.899561  | -0.396699 |
| C | -2.850015 | 2.828485  | 1.657332  |
| H | -1.910042 | 0.542068  | -2.156400 |
| H | -5.561642 | 2.810809  | -2.249079 |
| H | -5.167563 | 3.581040  | 0.082379  |
| H | -3.328080 | 2.208545  | 2.425359  |



|   |           |           |           |
|---|-----------|-----------|-----------|
| H | -3.009186 | 3.877173  | 1.917194  |
| C | 3.432813  | 0.156003  | -0.174303 |
| C | 4.375459  | 0.458057  | 0.815352  |
| C | 3.712811  | -0.678053 | -1.257379 |
| C | 5.640831  | -0.106300 | 0.693533  |
| C | 4.996140  | -1.226241 | -1.331908 |
| C | 5.967520  | -0.951998 | -0.371913 |
| H | 6.390245  | 0.111537  | 1.450949  |
| H | 5.240116  | -1.874276 | -2.169938 |
| C | 2.670437  | -0.980135 | -2.298327 |
| H | 2.138722  | -0.074812 | -2.605082 |
| H | 1.913989  | -1.671012 | -1.913157 |
| H | 3.127376  | -1.431945 | -3.180371 |
| C | 7.343179  | -1.560320 | -0.461966 |
| H | 7.503475  | -2.035556 | -1.431636 |
| H | 7.482120  | -2.319838 | 0.313696  |
| H | 8.116854  | -0.801690 | -0.317215 |
| C | 3.999688  | 1.330606  | 1.980823  |
| H | 3.175958  | 0.866315  | 2.532803  |
| H | 3.662655  | 2.315673  | 1.646149  |
| H | 4.846373  | 1.460726  | 2.656545  |
| H | -0.904443 | 2.272231  | 2.546157  |
| H | -3.934039 | 1.321381  | -3.361898 |
| H | 2.465993  | -2.096784 | 1.377888  |

Vibrational frequencies

|          |          |          |
|----------|----------|----------|
| 16.2566  | 20.5677  | 32.7713  |
| 39.8864  | 42.9405  | 45.0150  |
| 58.9932  | 68.9847  | 76.1125  |
| 94.3874  | 100.8132 | 104.3066 |
| 109.4584 | 128.3011 | 134.0362 |
| 141.8154 | 149.3657 | 168.9731 |
| 171.7088 | 175.4944 | 194.5754 |
| 208.6657 | 234.6827 | 250.1196 |
| 261.3216 | 278.4693 | 281.8419 |
| 299.3035 | 312.1499 | 316.0245 |
| 332.6181 | 343.5208 | 359.1349 |
| 375.4820 | 386.2422 | 395.8798 |
| 417.3545 | 421.9164 | 429.0135 |
| 435.9018 | 444.6084 | 495.2008 |
| 498.4012 | 504.4773 | 508.6362 |
| 522.1083 | 526.3995 | 532.2396 |
| 559.9413 | 583.4672 | 589.0004 |
| 595.2467 | 608.7444 | 620.8573 |
| 624.1789 | 630.4748 | 639.9225 |

|           |           |           |
|-----------|-----------|-----------|
| 666.7393  | 696.2553  | 715.1549  |
| 716.5068  | 729.6905  | 742.5707  |
| 761.5327  | 767.8052  | 770.7490  |
| 784.3833  | 804.7969  | 816.5635  |
| 839.5773  | 852.9123  | 867.3670  |
| 878.0016  | 884.4127  | 906.0707  |
| 915.6797  | 923.2362  | 929.0952  |
| 946.1320  | 949.6070  | 965.6807  |
| 981.7413  | 993.0798  | 996.1933  |
| 1002.6734 | 1007.0584 | 1015.9345 |
| 1017.4118 | 1026.2720 | 1032.2089 |
| 1037.6202 | 1040.6234 | 1047.0355 |
| 1054.4466 | 1058.0859 | 1064.3119 |
| 1066.7219 | 1068.4438 | 1071.5707 |
| 1076.3251 | 1106.7344 | 1122.6183 |
| 1126.0870 | 1142.6880 | 1173.1689 |
| 1177.5601 | 1183.2708 | 1188.5287 |
| 1205.2086 | 1211.6193 | 1216.8857 |
| 1232.9391 | 1247.1521 | 1259.0794 |
| 1267.9650 | 1272.4677 | 1284.1797 |
| 1284.9073 | 1290.1810 | 1302.3051 |
| 1316.2042 | 1326.3933 | 1337.2659 |
| 1344.0386 | 1355.2427 | 1360.1166 |
| 1366.2496 | 1374.0343 | 1376.7377 |
| 1395.5632 | 1407.8270 | 1411.7685 |
| 1418.1937 | 1420.9286 | 1430.9299 |
| 1455.6062 | 1469.2344 | 1471.5045 |
| 1478.1908 | 1486.5230 | 1487.8856 |
| 1495.0320 | 1497.0412 | 1498.8667 |
| 1503.1902 | 1505.6293 | 1516.2592 |
| 1524.5826 | 1530.4064 | 1533.2076 |
| 1552.2481 | 1559.2117 | 1639.6612 |
| 1664.9865 | 1680.7409 | 1687.2120 |
| 1693.6141 | 1697.5605 | 1704.2890 |
| 1709.1715 | 2335.4403 | 3071.7428 |
| 3075.0402 | 3075.1646 | 3079.3087 |
| 3104.8157 | 3129.5700 | 3140.5432 |
| 3146.1175 | 3146.9406 | 3147.2231 |
| 3148.1425 | 3162.5094 | 3167.8017 |
| 3167.9574 | 3172.5366 | 3182.9623 |
| 3192.5906 | 3193.8068 | 3197.8000 |
| 3198.4460 | 3204.5590 | 3207.7671 |
| 3211.4537 | 3212.1320 | 3225.4030 |
| 3225.7316 | 3244.0879 | 3843.6936 |

**Si-M2**

Zero-point correction= 0.531832

Thermal correction to Energy= 0.563041

Thermal correction to Enthalpy= 0.563985

Thermal correction to Gibbs Free Energy= 0.470209

Sum of electronic and zero-point Energies= -1566.444987

Sum of electronic and thermal Energies= -1566.413778

Sum of electronic and thermal Enthalpies= -1566.412834

Sum of electronic and thermal Free Energies= -1566.506610

Cartesian coordinates

|   |           |           |           |
|---|-----------|-----------|-----------|
| C | -0.341425 | 0.517926  | -1.382036 |
| C | 0.923836  | 1.128207  | -1.317665 |
| C | 1.694548  | 1.332641  | -0.190321 |
| O | -1.189341 | 0.877497  | -2.434501 |
| C | 3.127719  | 1.654032  | -0.217486 |
| C | 3.776637  | 2.183250  | 0.909080  |
| C | 3.894430  | 1.413975  | -1.369362 |
| C | 5.131566  | 2.492273  | 0.872667  |
| H | 3.208419  | 2.356928  | 1.818761  |
| C | 5.245283  | 1.740748  | -1.409055 |
| H | 3.434239  | 0.934411  | -2.228140 |
| C | 5.873489  | 2.284345  | -0.289396 |
| H | 5.609207  | 2.903827  | 1.756501  |
| H | 5.814932  | 1.547679  | -2.313046 |
| H | 6.930777  | 2.527024  | -0.316517 |
| C | 1.028624  | 1.316183  | 1.069356  |
| N | 0.453034  | 1.392515  | 2.078115  |
| H | 1.306340  | 1.501235  | -2.269881 |
| C | -0.804957 | -0.550558 | -0.600257 |
| C | -2.142686 | -2.074245 | 0.301503  |
| C | -3.334814 | -0.286002 | -0.951817 |
| H | -3.224686 | -0.078510 | -2.018057 |
| N | -0.963697 | -2.419014 | 0.698543  |
| N | -0.119890 | -1.490194 | 0.125398  |
| N | -2.119378 | -0.961114 | -0.498677 |
| C | -3.440615 | -2.764131 | 0.585275  |
| H | -3.416396 | -3.201748 | 1.583652  |
| H | -3.598104 | -3.565486 | -0.151259 |
| C | -4.573249 | -1.186720 | -0.726633 |
| O | -4.494731 | -1.828667 | 0.536819  |
| C | -5.086535 | 1.041312  | -0.061024 |
| C | -3.697657 | 0.977994  | -0.197187 |
| C | -2.879980 | 1.984412  | 0.302349  |

|   |           |           |           |
|---|-----------|-----------|-----------|
| C | -3.480720 | 3.074303  | 0.935961  |
| C | -4.867528 | 3.149976  | 1.057842  |
| C | -5.681562 | 2.130156  | 0.562119  |
| C | -5.733007 | -0.189863 | -0.653849 |
| H | -1.797324 | 1.915997  | 0.239920  |
| H | -5.318083 | 4.002861  | 1.555265  |
| H | -6.760358 | 2.180761  | 0.676508  |
| H | -6.119860 | 0.009970  | -1.659369 |
| H | -6.548897 | -0.593914 | -0.049964 |
| C | 1.290611  | -1.665260 | 0.224119  |
| C | 2.045114  | -1.841239 | -0.944047 |
| C | 1.887111  | -1.626905 | 1.493684  |
| C | 3.433720  | -1.851384 | -0.825012 |
| C | 3.279800  | -1.636675 | 1.553713  |
| C | 4.069521  | -1.705643 | 0.406574  |
| H | 4.033319  | -1.961039 | -1.726440 |
| H | 3.758694  | -1.568939 | 2.527777  |
| C | 1.077933  | -1.606596 | 2.763033  |
| H | 0.781876  | -2.624639 | 3.035101  |
| H | 0.171886  | -1.009900 | 2.657981  |
| H | 1.671320  | -1.190138 | 3.579714  |
| C | 5.567034  | -1.586225 | 0.491400  |
| H | 5.855691  | -0.530992 | 0.416272  |
| H | 6.057140  | -2.123321 | -0.324322 |
| H | 5.946335  | -1.971378 | 1.440906  |
| C | 1.413864  | -2.020626 | -2.299949 |
| H | 1.323262  | -1.065642 | -2.827737 |
| H | 0.411615  | -2.450083 | -2.225237 |
| H | 2.030297  | -2.686146 | -2.908322 |
| H | -4.683514 | -1.938507 | -1.519036 |
| H | -2.858920 | 3.864386  | 1.343974  |
| H | -1.473732 | 1.791358  | -2.298670 |

Vibrational frequencies

|          |          |          |
|----------|----------|----------|
| 20.4647  | 28.5811  | 32.5417  |
| 45.9813  | 53.3565  | 64.7035  |
| 77.5077  | 83.7426  | 91.3018  |
| 103.5994 | 116.5538 | 116.7893 |
| 124.8097 | 137.6500 | 140.1709 |
| 158.2642 | 169.4222 | 184.5738 |
| 204.6902 | 211.6318 | 213.1244 |
| 230.6589 | 234.0193 | 247.0212 |
| 270.9539 | 284.8479 | 293.3673 |
| 307.6586 | 325.6299 | 328.4817 |
| 339.4536 | 352.1760 | 361.0916 |

|           |           |           |
|-----------|-----------|-----------|
| 379.0244  | 399.1500  | 413.9588  |
| 418.8705  | 421.7109  | 429.9815  |
| 440.2896  | 450.4880  | 477.0936  |
| 491.2299  | 495.9787  | 507.5402  |
| 522.0267  | 524.8474  | 551.4720  |
| 562.2935  | 582.4754  | 584.0256  |
| 590.1838  | 612.1032  | 628.5322  |
| 631.3824  | 634.1868  | 643.8180  |
| 658.0417  | 678.5546  | 699.2694  |
| 709.3646  | 715.0341  | 727.7525  |
| 755.6073  | 760.5313  | 768.2890  |
| 783.5675  | 810.5282  | 817.6734  |
| 844.1626  | 870.2454  | 873.1196  |
| 875.0834  | 880.5184  | 900.7608  |
| 905.9065  | 922.2908  | 925.0156  |
| 943.4009  | 963.2416  | 968.8070  |
| 980.2623  | 990.5326  | 997.3527  |
| 1003.2777 | 1014.8659 | 1016.2368 |
| 1022.0376 | 1025.2528 | 1041.4325 |
| 1045.7484 | 1049.5759 | 1053.8939 |
| 1061.9799 | 1062.3532 | 1064.0146 |
| 1067.0937 | 1070.0467 | 1076.5306 |
| 1082.2965 | 1110.4052 | 1116.1567 |
| 1124.1701 | 1172.4431 | 1177.8290 |
| 1178.9293 | 1189.9825 | 1196.5910 |
| 1210.1148 | 1213.5624 | 1218.0040 |
| 1230.3034 | 1250.9717 | 1267.1746 |
| 1269.9963 | 1281.6923 | 1287.3734 |
| 1299.6530 | 1307.6034 | 1319.9796 |
| 1321.8543 | 1336.7516 | 1339.2734 |
| 1349.3784 | 1352.6871 | 1362.7839 |
| 1366.4858 | 1375.8419 | 1385.7219 |
| 1388.0511 | 1402.6694 | 1415.5758 |
| 1418.8386 | 1420.3064 | 1429.6910 |
| 1445.1840 | 1464.3023 | 1470.1644 |
| 1477.9530 | 1482.4124 | 1490.8777 |
| 1495.7747 | 1497.6170 | 1499.2436 |
| 1508.2217 | 1510.2205 | 1517.7543 |
| 1519.7958 | 1531.0406 | 1536.9317 |
| 1551.0646 | 1563.6137 | 1656.5148 |
| 1668.0477 | 1677.9076 | 1680.2453 |
| 1691.1550 | 1698.3016 | 1706.3211 |
| 1713.4178 | 2346.9022 | 3051.8771 |
| 3065.6108 | 3072.4225 | 3075.9738 |

|           |           |           |
|-----------|-----------|-----------|
| 3077.6309 | 3086.7513 | 3139.9762 |
| 3144.3919 | 3145.3905 | 3147.0215 |
| 3149.0464 | 3159.4879 | 3167.5059 |
| 3170.3440 | 3172.8469 | 3179.1072 |
| 3183.1925 | 3192.9855 | 3194.3499 |
| 3200.6724 | 3204.4670 | 3209.1149 |
| 3211.5818 | 3215.3761 | 3221.7846 |
| 3228.1500 | 3229.9009 | 3831.5216 |

## DQ

Zero-point correction= 0.622022

Thermal correction to Energy= 0.654775

Thermal correction to Enthalpy= 0.655719

Thermal correction to Gibbs Free Energy= 0.559982

Sum of electronic and zero-point Energies= -1240.375040

Sum of electronic and thermal Energies= -1240.342287

Sum of electronic and thermal Enthalpies= -1240.341343

Sum of electronic and thermal Free Energies= -1240.437080

Cartesian coordinates

|   |           |           |           |
|---|-----------|-----------|-----------|
| C | -2.808475 | 1.282007  | -0.003918 |
| C | -1.459368 | 1.235142  | 0.033000  |
| C | -0.693431 | 0.000059  | 0.012501  |
| C | -1.459306 | -1.235063 | 0.034475  |
| C | -2.808382 | -1.281994 | -0.002582 |
| C | -3.569664 | -0.000038 | -0.087733 |
| H | -0.917985 | 2.167500  | 0.088036  |
| H | -0.917759 | -2.167185 | 0.091819  |
| C | 0.693521  | 0.000021  | -0.011471 |
| C | 1.459374  | -1.235131 | -0.033884 |
| C | 1.459591  | 1.235054  | -0.031948 |
| C | 2.808472  | -1.282090 | 0.002201  |
| H | 0.917938  | -2.167298 | -0.092025 |
| C | 2.808719  | 1.281885  | 0.004296  |
| H | 0.918214  | 2.167411  | -0.087234 |
| C | 3.569910  | -0.000232 | 0.088086  |
| O | 4.790490  | -0.000581 | 0.216295  |
| O | -4.790278 | -0.000321 | -0.216131 |
| C | 3.585170  | -2.598232 | -0.030236 |
| C | 4.551552  | -2.605940 | -1.230311 |
| C | 4.374162  | -2.775649 | 1.281067  |
| C | 2.646842  | -3.801707 | -0.178329 |
| H | 4.000274  | -2.485858 | -2.168658 |
| H | 5.291160  | -1.809373 | -1.151089 |
| H | 5.075769  | -3.566585 | -1.266685 |

|   |           |           |           |
|---|-----------|-----------|-----------|
| H | 3.694322  | -2.784151 | 2.139102  |
| H | 4.902380  | -3.734696 | 1.257741  |
| H | 5.104388  | -1.978676 | 1.417213  |
| H | 3.244957  | -4.716504 | -0.212169 |
| H | 1.956807  | -3.887927 | 0.667597  |
| H | 2.062096  | -3.750129 | -1.102706 |
| C | 3.585361  | 2.598194  | -0.026617 |
| C | 4.375821  | 2.773678  | 1.284054  |
| C | 4.550753  | 2.607788  | -1.227470 |
| C | 2.646724  | 3.801837  | -0.171960 |
| H | 3.697090  | 2.779932  | 2.142989  |
| H | 5.106891  | 1.977091  | 1.417756  |
| H | 4.903118  | 3.733258  | 1.261974  |
| H | 3.998670  | 2.491004  | -2.165746 |
| H | 5.076440  | 3.567718  | -1.261582 |
| H | 5.289264  | 1.809883  | -1.150831 |
| H | 3.244757  | 4.716704  | -0.205508 |
| H | 2.060770  | 3.751411  | -1.095635 |
| H | 1.957821  | 3.886984  | 0.674943  |
| C | -3.585185 | 2.598238  | 0.026100  |
| C | -4.551654 | 2.607600  | 1.226281  |
| C | -2.646869 | 3.801907  | 0.173183  |
| C | -4.374298 | 2.774045  | -1.285238 |
| H | -5.290849 | 1.810532  | 1.148653  |
| H | -4.000086 | 2.489538  | 2.164744  |
| H | -5.076264 | 3.568091  | 1.260935  |
| H | -1.957614 | 3.888171  | -0.673339 |
| H | -3.245105 | 4.716617  | 0.207364  |
| H | -2.061292 | 3.750442  | 1.097072  |
| H | -4.902222 | 3.733293  | -1.263199 |
| H | -3.694909 | 2.780959  | -2.143617 |
| H | -5.104890 | 1.977089  | -1.419798 |
| C | -3.585418 | -2.598011 | 0.029866  |
| C | -4.552201 | -2.605394 | 1.229759  |
| C | -4.373969 | -2.775422 | -1.281654 |
| C | -2.647650 | -3.801836 | 0.178870  |
| H | -4.000746 | -2.487490 | 2.168306  |
| H | -5.290518 | -1.807606 | 1.151611  |
| H | -5.077964 | -3.565237 | 1.264794  |
| H | -3.694064 | -2.782990 | -2.139645 |
| H | -4.901629 | -3.734799 | -1.259002 |
| H | -5.104626 | -1.978732 | -1.417441 |
| H | -3.246279 | -4.716285 | 0.213208  |
| H | -1.957590 | -3.889216 | -0.666879 |

H      -2.063034    -3.749990      1.103286

Vibrational frequencies

|           |           |           |
|-----------|-----------|-----------|
| 14.2571   | 23.1535   | 26.9314   |
| 45.0192   | 60.1746   | 68.7021   |
| 71.7073   | 78.6096   | 112.5322  |
| 127.7313  | 143.7120  | 151.0513  |
| 160.1680  | 161.6420  | 165.0617  |
| 183.4848  | 202.6602  | 211.7240  |
| 221.9422  | 226.1780  | 240.6230  |
| 240.7371  | 241.0664  | 241.2060  |
| 266.5640  | 271.7034  | 274.0678  |
| 289.0996  | 295.0030  | 303.1734  |
| 314.9161  | 315.1719  | 320.3120  |
| 335.8343  | 352.7323  | 353.1779  |
| 359.0662  | 361.2209  | 363.1439  |
| 367.4347  | 382.9316  | 384.3627  |
| 385.6257  | 394.8705  | 396.6098  |
| 406.2502  | 411.9289  | 442.5357  |
| 444.1891  | 446.9515  | 449.4105  |
| 468.8731  | 518.2502  | 524.5402  |
| 529.7427  | 547.6955  | 569.3505  |
| 578.3699  | 587.1430  | 640.8217  |
| 675.4508  | 681.2127  | 687.6915  |
| 764.0060  | 765.5619  | 804.7212  |
| 818.2532  | 821.8739  | 823.4899  |
| 835.2622  | 860.4848  | 889.5948  |
| 905.7906  | 911.0326  | 913.5121  |
| 915.6245  | 934.2230  | 944.1085  |
| 947.7880  | 947.9037  | 948.0780  |
| 948.7422  | 957.9929  | 958.3588  |
| 958.6305  | 958.6923  | 963.7048  |
| 963.7482  | 963.8003  | 963.8041  |
| 1027.1924 | 1046.0539 | 1052.0805 |
| 1052.6033 | 1054.8783 | 1055.3859 |
| 1055.8755 | 1056.2185 | 1068.0819 |
| 1116.7714 | 1122.3028 | 1223.5954 |
| 1225.4775 | 1244.5182 | 1244.6436 |
| 1244.7490 | 1245.2080 | 1254.1005 |
| 1257.1447 | 1258.9314 | 1259.0562 |
| 1300.4770 | 1310.5550 | 1311.6309 |
| 1318.7701 | 1346.2208 | 1387.4450 |
| 1393.9675 | 1395.2806 | 1395.4150 |
| 1396.9441 | 1398.2958 | 1400.3293 |
| 1400.9115 | 1406.5609 | 1409.7352 |



|           |           |           |
|-----------|-----------|-----------|
| 1427.3686 | 1428.3286 | 1429.2822 |
| 1429.5695 | 1436.1429 | 1462.1132 |
| 1483.3332 | 1487.1494 | 1487.1822 |
| 1487.3511 | 1487.3963 | 1500.8988 |
| 1501.5279 | 1501.6784 | 1502.0762 |
| 1502.2934 | 1502.7448 | 1502.9252 |
| 1505.2697 | 1508.1056 | 1508.5035 |
| 1508.6412 | 1508.8113 | 1519.0244 |
| 1519.1082 | 1519.4373 | 1519.5658 |
| 1533.9917 | 1534.0403 | 1534.2767 |
| 1534.7821 | 1602.8146 | 1669.1006 |
| 1680.4995 | 1719.7428 | 1734.4013 |
| 1743.4979 | 1760.7706 | 3056.7268 |
| 3056.7872 | 3057.0689 | 3057.1619 |
| 3060.2651 | 3060.3110 | 3060.3285 |
| 3060.3745 | 3063.7052 | 3063.7634 |
| 3063.7912 | 3064.1763 | 3130.8999 |
| 3130.9567 | 3131.0235 | 3131.0780 |
| 3132.0956 | 3132.1705 | 3132.2105 |
| 3132.3202 | 3134.7529 | 3134.8929 |
| 3135.1859 | 3135.3431 | 3148.8000 |
| 3148.8320 | 3148.8786 | 3148.9916 |
| 3190.4919 | 3190.7557 | 3190.9262 |
| 3190.9930 | 3196.2425 | 3197.2389 |
| 3197.4971 | 3198.0279 | 3258.6819 |
| 3258.9633 | 3291.9840 | 3293.8272 |

### TS3

Zero-point correction= 1.150210

Thermal correction to Energy= 1.214117

Thermal correction to Enthalpy= 1.215061

Thermal correction to Gibbs Free Energy= 1.054510

Sum of electronic and zero-point Energies= -2806.834688

Sum of electronic and thermal Energies= -2806.770781

Sum of electronic and thermal Enthalpies= -2806.769837

Sum of electronic and thermal Free Energies= -2806.930388

Cartesian coordinates

|   |           |           |           |
|---|-----------|-----------|-----------|
| C | 2.148066  | 0.053094  | -0.884685 |
| C | 0.803855  | 0.137164  | -0.571388 |
| C | 0.223222  | 0.796030  | 0.535103  |
| O | 2.667489  | -0.812393 | -1.721415 |
| C | -1.117335 | 1.319132  | 0.591609  |
| C | -1.578391 | 1.994270  | 1.748516  |
| C | -1.988023 | 1.260211  | -0.520542 |

|   |           |           |           |
|---|-----------|-----------|-----------|
| C | -2.832147 | 2.567359  | 1.784575  |
| H | -0.922578 | 2.082394  | 2.610438  |
| C | -3.246091 | 1.846042  | -0.475297 |
| H | -1.653055 | 0.788987  | -1.440610 |
| C | -3.697169 | 2.472808  | 0.682502  |
| H | -3.144335 | 3.102106  | 2.675960  |
| H | -3.887943 | 1.787172  | -1.348803 |
| H | -4.687041 | 2.918178  | 0.720105  |
| C | 1.042823  | 0.971698  | 1.688710  |
| N | 1.698564  | 1.073523  | 2.645949  |
| H | 0.148294  | -0.409567 | -1.245720 |
| C | 3.107011  | 1.123192  | -0.525373 |
| C | 4.991860  | 2.244346  | -0.452417 |
| C | 5.273009  | -0.219217 | -0.313301 |
| H | 4.821080  | -0.977357 | -0.958557 |
| N | 4.064638  | 3.154579  | -0.523917 |
| N | 2.899119  | 2.452098  | -0.574231 |
| N | 4.453090  | 0.989247  | -0.440416 |
| C | 6.476696  | 2.437541  | -0.540615 |
| H | 6.786326  | 3.271694  | 0.089956  |
| H | 6.723837  | 2.674558  | -1.585545 |
| C | 6.727880  | 0.085806  | -0.738237 |
| O | 7.156253  | 1.286469  | -0.105429 |
| C | 6.756433  | -1.242371 | 1.219025  |
| C | 5.468686  | -0.712433 | 1.105242  |
| C | 4.602141  | -0.669375 | 2.183118  |
| C | 5.030930  | -1.213980 | 3.396343  |
| C | 6.299204  | -1.780866 | 3.508756  |
| C | 7.176887  | -1.792120 | 2.421099  |
| C | 7.517494  | -1.045968 | -0.074183 |
| H | 3.620491  | -0.212686 | 2.100518  |
| H | 6.618581  | -2.198222 | 4.458402  |
| H | 8.176856  | -2.202454 | 2.524175  |
| H | 7.490421  | -1.942685 | -0.702940 |
| H | 8.560753  | -0.756944 | 0.070423  |
| C | 1.666481  | 3.151211  | -0.828364 |
| C | 1.077598  | 3.007897  | -2.090361 |
| C | 1.118131  | 3.938175  | 0.186807  |
| C | -0.154602 | 3.626084  | -2.288249 |
| C | -0.115522 | 4.538167  | -0.069655 |
| C | -0.774957 | 4.375804  | -1.285800 |
| H | -0.641431 | 3.520350  | -3.254815 |
| H | -0.577611 | 5.133545  | 0.714310  |
| C | 1.819490  | 4.176141  | 1.497957  |

|   |           |           |           |
|---|-----------|-----------|-----------|
| H | 2.393943  | 5.106777  | 1.449953  |
| H | 2.504608  | 3.369297  | 1.757961  |
| H | 1.086923  | 4.270921  | 2.302915  |
| C | -2.111622 | 5.027278  | -1.523306 |
| H | -2.728655 | 4.978525  | -0.622913 |
| H | -2.650719 | 4.534657  | -2.335517 |
| H | -1.987025 | 6.081617  | -1.791306 |
| C | 1.741571  | 2.238224  | -3.203407 |
| H | 1.569350  | 1.160151  | -3.119604 |
| H | 2.824189  | 2.397857  | -3.206724 |
| H | 1.349232  | 2.567175  | -4.167367 |
| H | 6.849614  | 0.157820  | -1.825788 |
| H | 4.369723  | -1.188916 | 4.256487  |
| H | 2.181564  | -1.933151 | -1.668823 |
| C | -0.604415 | -2.570740 | -2.206308 |
| C | -1.835634 | -2.165074 | -1.742994 |
| C | -2.127548 | -2.015721 | -0.361192 |
| C | -1.158747 | -2.520802 | 0.549515  |
| C | 0.072830  | -2.989940 | 0.147860  |
| C | 0.427074  | -2.852081 | -1.234832 |
| H | -2.588404 | -1.886750 | -2.466599 |
| H | -1.417666 | -2.568025 | 1.598427  |
| C | -3.322964 | -1.372074 | 0.090283  |
| C | -3.498234 | -1.005105 | 1.463823  |
| C | -4.408094 | -1.088268 | -0.805164 |
| C | -4.656207 | -0.484687 | 1.961807  |
| H | -2.656337 | -1.139826 | 2.130476  |
| C | -5.581424 | -0.529018 | -0.405895 |
| H | -4.285131 | -1.336630 | -1.850375 |
| C | -5.796752 | -0.270476 | 1.040232  |
| O | 1.678903  | -2.992724 | -1.612523 |
| O | -6.905232 | 0.086709  | 1.461445  |
| C | 1.069858  | -3.582439 | 1.149467  |
| C | 1.567731  | -4.948474 | 0.643912  |
| C | 2.255041  | -2.627301 | 1.352700  |
| C | 0.423639  | -3.805731 | 2.523542  |
| H | 0.730017  | -5.646349 | 0.542095  |
| H | 2.067532  | -4.854739 | -0.320320 |
| H | 2.274546  | -5.371180 | 1.365955  |
| H | 1.898579  | -1.668451 | 1.744954  |
| H | 2.956371  | -3.048538 | 2.081717  |
| H | 2.796751  | -2.445426 | 0.421882  |
| H | 1.149139  | -4.292006 | 3.182403  |
| H | 0.132388  | -2.862187 | 2.996794  |

|   |           |           |           |
|---|-----------|-----------|-----------|
| H | -0.458950 | -4.450446 | 2.457924  |
| C | -0.323901 | -2.685197 | -3.711162 |
| C | 0.627054  | -1.567243 | -4.171948 |
| C | 0.287094  | -4.061563 | -4.029293 |
| C | -1.614061 | -2.557694 | -4.533936 |
| H | 0.191593  | -0.585630 | -3.947858 |
| H | 1.600007  | -1.632616 | -3.686222 |
| H | 0.771758  | -1.630885 | -5.256312 |
| H | -0.397492 | -4.861801 | -3.729294 |
| H | 0.454392  | -4.146536 | -5.108286 |
| H | 1.237366  | -4.201721 | -3.515415 |
| H | -1.380891 | -2.729189 | -5.588820 |
| H | -2.362821 | -3.296033 | -4.229061 |
| H | -2.057460 | -1.559665 | -4.455109 |
| C | -6.709622 | -0.210547 | -1.386898 |
| C | -7.101972 | 1.274689  | -1.267031 |
| C | -6.286496 | -0.462165 | -2.839300 |
| C | -7.934821 | -1.096888 | -1.092699 |
| H | -7.441880 | 1.511271  | -0.259168 |
| H | -6.251979 | 1.920273  | -1.514391 |
| H | -7.908645 | 1.498230  | -1.973544 |
| H | -6.058642 | -1.517224 | -3.022410 |
| H | -7.108203 | -0.181344 | -3.504671 |
| H | -5.410417 | 0.134890  | -3.116453 |
| H | -8.727061 | -0.879175 | -1.817494 |
| H | -7.670788 | -2.155377 | -1.186834 |
| H | -8.316039 | -0.916756 | -0.087941 |
| C | -4.864647 | -0.253747 | 3.460732  |
| C | -5.436399 | 1.141027  | 3.772501  |
| C | -5.851177 | -1.322645 | 3.973808  |
| C | -3.551515 | -0.400244 | 4.239436  |
| H | -4.751519 | 1.922803  | 3.438116  |
| H | -6.402310 | 1.290548  | 3.294228  |
| H | -5.559973 | 1.241877  | 4.856410  |
| H | -5.453747 | -2.327649 | 3.798794  |
| H | -6.001811 | -1.197242 | 5.051894  |
| H | -6.816062 | -1.230890 | 3.472289  |
| H | -3.735794 | -0.189205 | 5.297064  |
| H | -3.143884 | -1.414221 | 4.172376  |
| H | -2.794924 | 0.304244  | 3.877004  |

Vibrational frequencies

|            |         |         |
|------------|---------|---------|
| -1321.2453 | 11.5363 | 13.3279 |
| 25.4472    | 28.8732 | 31.1608 |
| 39.8576    | 44.4735 | 45.6665 |

|          |          |          |
|----------|----------|----------|
| 51.2475  | 53.7994  | 55.9492  |
| 60.0376  | 63.7984  | 67.7665  |
| 76.7112  | 79.4367  | 81.3412  |
| 83.6865  | 86.8804  | 90.4311  |
| 100.1200 | 109.6530 | 112.8044 |
| 119.6878 | 126.0510 | 130.5440 |
| 139.3930 | 140.6882 | 155.3029 |
| 155.8105 | 162.8412 | 164.1636 |
| 166.3578 | 170.6760 | 173.7299 |
| 175.2475 | 180.0048 | 187.2388 |
| 196.4479 | 202.1960 | 205.7078 |
| 212.4817 | 213.3734 | 221.5141 |
| 222.9465 | 229.6458 | 236.7926 |
| 246.1998 | 250.9674 | 253.3368 |
| 259.7093 | 264.4882 | 269.7206 |
| 271.3304 | 281.0492 | 283.0476 |
| 291.6086 | 294.3467 | 295.8407 |
| 298.7984 | 304.8630 | 308.8539 |
| 313.0021 | 319.0842 | 322.0637 |
| 328.4272 | 331.4824 | 332.6782 |
| 336.6963 | 342.6348 | 349.1215 |
| 354.9038 | 358.2981 | 361.6106 |
| 364.4720 | 366.7474 | 368.8365 |
| 369.9207 | 377.7230 | 387.3012 |
| 388.9383 | 397.3208 | 400.0173 |
| 403.6651 | 405.4835 | 409.3597 |
| 413.7159 | 418.6622 | 425.4807 |
| 436.6363 | 442.8922 | 444.8780 |
| 445.3662 | 457.8834 | 469.7245 |
| 471.9328 | 477.9203 | 489.1087 |
| 501.1630 | 505.9081 | 509.6465 |
| 519.6397 | 525.1442 | 527.1199 |
| 530.4979 | 537.1649 | 552.0286 |
| 553.8267 | 570.2978 | 575.5678 |
| 582.7852 | 585.4989 | 589.7345 |
| 591.8523 | 608.5213 | 614.3745 |
| 624.4797 | 628.1666 | 628.7258 |
| 641.9265 | 649.2540 | 667.2377 |
| 671.8451 | 677.8494 | 685.1646 |
| 686.4660 | 693.2042 | 698.4186 |
| 711.4656 | 729.9920 | 749.2415 |
| 758.9686 | 767.0914 | 775.1145 |
| 776.5607 | 779.6665 | 787.5231 |
| 805.6312 | 809.6050 | 812.0338 |

|           |           |           |
|-----------|-----------|-----------|
| 817.5929  | 830.6025  | 833.2392  |
| 841.3791  | 845.8463  | 849.7658  |
| 864.6829  | 871.1050  | 874.3223  |
| 876.9260  | 880.3690  | 881.5943  |
| 901.3587  | 908.0603  | 908.6285  |
| 913.7554  | 915.3725  | 916.4250  |
| 924.3072  | 928.5089  | 931.2024  |
| 950.2445  | 950.9530  | 952.0612  |
| 952.7192  | 954.2059  | 955.4452  |
| 956.5202  | 957.9934  | 959.9924  |
| 962.5347  | 962.6927  | 963.8624  |
| 964.8818  | 967.5226  | 970.6736  |
| 976.8085  | 982.9723  | 994.8219  |
| 1000.4654 | 1007.4304 | 1012.4696 |
| 1013.6685 | 1026.2778 | 1038.5343 |
| 1040.3489 | 1041.1707 | 1045.2028 |
| 1049.9169 | 1052.6145 | 1053.3227 |
| 1053.6337 | 1055.4657 | 1056.0222 |
| 1056.7041 | 1058.7183 | 1060.7453 |
| 1062.7208 | 1065.1700 | 1065.3027 |
| 1066.1786 | 1067.5726 | 1077.4980 |
| 1099.9838 | 1114.6187 | 1122.8392 |
| 1123.4340 | 1130.7202 | 1141.5840 |
| 1147.6121 | 1178.5166 | 1180.9191 |
| 1181.7606 | 1189.1916 | 1207.5152 |
| 1215.0763 | 1217.4926 | 1224.4446 |
| 1235.3473 | 1236.8279 | 1241.9171 |
| 1243.1037 | 1250.1522 | 1251.4212 |
| 1253.6210 | 1253.9237 | 1255.1640 |
| 1258.8825 | 1260.6256 | 1263.6477 |
| 1275.5355 | 1284.3244 | 1286.7984 |
| 1292.4296 | 1298.1710 | 1298.6297 |
| 1305.5201 | 1313.5324 | 1318.2354 |
| 1319.9602 | 1322.3130 | 1337.1012 |
| 1343.1631 | 1349.4677 | 1356.6436 |
| 1358.6904 | 1362.7722 | 1366.1189 |
| 1377.1001 | 1378.9429 | 1379.3583 |
| 1380.1825 | 1389.3297 | 1392.8816 |
| 1393.0172 | 1394.3815 | 1395.4169 |
| 1397.5018 | 1398.1916 | 1399.5522 |
| 1403.1932 | 1408.3191 | 1409.7032 |
| 1417.0764 | 1420.2164 | 1426.4900 |
| 1427.1413 | 1427.9978 | 1429.9776 |
| 1430.6759 | 1437.0464 | 1457.1126 |

|           |           |           |
|-----------|-----------|-----------|
| 1459.9959 | 1464.6692 | 1467.0572 |
| 1473.4306 | 1478.9732 | 1484.7650 |
| 1485.2341 | 1487.1889 | 1487.7778 |
| 1490.2900 | 1492.0647 | 1493.3298 |
| 1493.9396 | 1495.7839 | 1497.3773 |
| 1498.0920 | 1500.7538 | 1501.6542 |
| 1502.0222 | 1504.9277 | 1505.2747 |
| 1505.6203 | 1506.2642 | 1507.1617 |
| 1507.6706 | 1508.5393 | 1511.4419 |
| 1514.5345 | 1514.9365 | 1516.1622 |
| 1518.1909 | 1518.7374 | 1519.7276 |
| 1520.1465 | 1522.7650 | 1523.9870 |
| 1531.0649 | 1534.5018 | 1535.8382 |
| 1536.3841 | 1536.7199 | 1539.4193 |
| 1548.3963 | 1554.3393 | 1582.7859 |
| 1591.7610 | 1613.7839 | 1621.9260 |
| 1635.1483 | 1665.5777 | 1672.3841 |
| 1682.8538 | 1686.4195 | 1687.7393 |
| 1690.5206 | 1696.9299 | 1703.8376 |
| 1709.5705 | 2328.8592 | 3050.4965 |
| 3053.2749 | 3055.7390 | 3056.0180 |
| 3057.3055 | 3057.7186 | 3059.8592 |
| 3060.4047 | 3061.7342 | 3061.8554 |
| 3063.2384 | 3066.8639 | 3067.2942 |
| 3069.4741 | 3075.0270 | 3077.2562 |
| 3090.3271 | 3111.8852 | 3120.1848 |
| 3127.8921 | 3128.9065 | 3129.5321 |
| 3132.4504 | 3133.4272 | 3133.8289 |
| 3136.2895 | 3136.4174 | 3137.1048 |
| 3137.7094 | 3139.8156 | 3140.1720 |
| 3142.3001 | 3143.4327 | 3144.0185 |
| 3144.6358 | 3146.6613 | 3148.6854 |
| 3150.8493 | 3160.4837 | 3167.0592 |
| 3169.6828 | 3170.0011 | 3170.2824 |
| 3172.8772 | 3181.8937 | 3183.3596 |
| 3185.3352 | 3187.8814 | 3188.2304 |
| 3189.4718 | 3194.2786 | 3195.4779 |
| 3197.1856 | 3200.4325 | 3201.7783 |
| 3204.6867 | 3210.3793 | 3214.2432 |
| 3220.2302 | 3221.7540 | 3225.8222 |
| 3230.2939 | 3233.5473 | 3238.3607 |
| 3240.0650 | 3266.1456 | 3268.2529 |

### M3

Zero-point correction= 1.156198  
 Thermal correction to Energy= 1.220439  
 Thermal correction to Enthalpy= 1.221383  
 Thermal correction to Gibbs Free Energy= 1.060273  
 Sum of electronic and zero-point Energies= -2806.837689  
 Sum of electronic and thermal Energies= -2806.773448  
 Sum of electronic and thermal Enthalpies= -2806.772504  
 Sum of electronic and thermal Free Energies= -2806.933614

Cartesian coordinates

|   |           |           |           |
|---|-----------|-----------|-----------|
| C | -2.309133 | -0.055320 | 0.762014  |
| C | -0.911972 | 0.072698  | 0.432972  |
| C | -0.395769 | 0.824058  | -0.592514 |
| O | -2.800243 | -1.005190 | 1.373305  |
| C | 0.963752  | 1.319512  | -0.708227 |
| C | 1.359899  | 2.034193  | -1.857703 |
| C | 1.859098  | 1.225165  | 0.374524  |
| C | 2.602959  | 2.635248  | -1.913551 |
| H | 0.677150  | 2.129537  | -2.697440 |
| C | 3.102071  | 1.837450  | 0.312365  |
| H | 1.565154  | 0.699818  | 1.278332  |
| C | 3.489247  | 2.523331  | -0.834790 |
| H | 2.889696  | 3.190041  | -2.800685 |
| H | 3.788797  | 1.741318  | 1.145978  |
| H | 4.472392  | 2.981520  | -0.887285 |
| C | -1.305705 | 1.162593  | -1.661632 |
| N | -2.045676 | 1.361234  | -2.531818 |
| H | -0.244790 | -0.468867 | 1.099659  |
| C | -3.256752 | 1.123659  | 0.582342  |
| C | -5.108145 | 2.277757  | 0.627891  |
| C | -5.460032 | -0.182646 | 0.449436  |
| H | -5.058696 | -0.917438 | 1.149070  |
| N | -4.152089 | 3.160293  | 0.724545  |
| N | -3.008441 | 2.435066  | 0.697088  |
| N | -4.601530 | 1.013690  | 0.546469  |
| C | -6.586924 | 2.515573  | 0.690755  |
| H | -6.847076 | 3.386544  | 0.088466  |
| H | -6.862471 | 2.712340  | 1.736551  |
| C | -6.919250 | 0.184186  | 0.812515  |
| O | -7.274169 | 1.403881  | 0.176625  |
| C | -6.910629 | -1.205614 | -1.112380 |
| C | -5.602625 | -0.746230 | -0.946325 |
| C | -4.662089 | -0.847879 | -1.956620 |
| C | -5.045104 | -1.443449 | -3.159849 |
| C | -6.342724 | -1.924900 | -3.327027 |



|   |           |           |           |
|---|-----------|-----------|-----------|
| C | -7.287461 | -1.807169 | -2.304792 |
| C | -7.730907 | -0.917168 | 0.124851  |
| H | -3.655875 | -0.459064 | -1.836000 |
| H | -6.626812 | -2.384222 | -4.268246 |
| H | -8.302324 | -2.164929 | -2.448214 |
| H | -7.797593 | -1.796448 | 0.774587  |
| H | -8.743950 | -0.568949 | -0.087569 |
| C | -1.747151 | 3.119292  | 0.875962  |
| C | -1.053774 | 2.908182  | 2.074281  |
| C | -1.295869 | 3.971215  | -0.134141 |
| C | 0.186197  | 3.524705  | 2.204849  |
| C | -0.040701 | 4.557212  | 0.051487  |
| C | 0.717453  | 4.336577  | 1.197331  |
| H | 0.752780  | 3.368008  | 3.119317  |
| H | 0.348629  | 5.204026  | -0.730962 |
| C | -2.106504 | 4.313202  | -1.357234 |
| H | -2.574040 | 5.293326  | -1.222314 |
| H | -2.894585 | 3.589832  | -1.561842 |
| H | -1.457587 | 4.366157  | -2.234503 |
| C | 2.060777  | 4.993243  | 1.369626  |
| H | 2.541607  | 5.153790  | 0.402301  |
| H | 2.721896  | 4.378269  | 1.984203  |
| H | 1.951741  | 5.965886  | 1.860474  |
| C | -1.620989 | 2.068040  | 3.188479  |
| H | -1.508372 | 0.996012  | 2.995845  |
| H | -2.685698 | 2.268650  | 3.339830  |
| H | -1.099529 | 2.285088  | 4.121754  |
| H | -7.076934 | 0.257426  | 1.895427  |
| H | -4.325971 | -1.525551 | -3.968243 |
| H | -2.105797 | -2.771167 | 1.413018  |
| C | 0.612026  | -2.688226 | 2.016952  |
| C | 1.829527  | -2.127082 | 1.635772  |
| C | 2.228665  | -1.997372 | 0.293962  |
| C | 1.359946  | -2.525034 | -0.674483 |
| C | 0.117568  | -3.072332 | -0.362644 |
| C | -0.274043 | -3.089607 | 0.991705  |
| H | 2.488838  | -1.753132 | 2.406962  |
| H | 1.680852  | -2.520737 | -1.706719 |
| C | 3.489237  | -1.338878 | -0.080009 |
| C | 3.754113  | -0.942530 | -1.407348 |
| C | 4.495418  | -1.071094 | 0.873494  |
| C | 4.931245  | -0.338312 | -1.802574 |
| H | 2.978803  | -1.095283 | -2.149676 |
| C | 5.681489  | -0.437268 | 0.570605  |

|   |           |           |           |
|---|-----------|-----------|-----------|
| H | 4.333117  | -1.394634 | 1.895194  |
| C | 5.972536  | -0.069231 | -0.814200 |
| O | -1.533797 | -3.554261 | 1.325360  |
| O | 7.083378  | 0.439352  | -1.140765 |
| C | -0.792883 | -3.628622 | -1.468741 |
| C | -1.173085 | -5.090334 | -1.171024 |
| C | -2.054758 | -2.761445 | -1.590639 |
| C | -0.103753 | -3.610635 | -2.840881 |
| H | -0.272383 | -5.709672 | -1.108587 |
| H | -1.723239 | -5.178797 | -0.234917 |
| H | -1.795813 | -5.480414 | -1.983696 |
| H | -1.774404 | -1.733204 | -1.851017 |
| H | -2.703177 | -3.143484 | -2.387157 |
| H | -2.637844 | -2.740250 | -0.667161 |
| H | -0.784842 | -4.035290 | -3.584459 |
| H | 0.145396  | -2.593917 | -3.161373 |
| H | 0.812265  | -4.209383 | -2.842926 |
| C | 0.263161  | -2.870703 | 3.504955  |
| C | -0.950248 | -2.014755 | 3.905909  |
| C | -0.028752 | -4.356505 | 3.785406  |
| C | 1.426390  | -2.452828 | 4.415770  |
| H | -0.768452 | -0.961208 | 3.663554  |
| H | -1.866052 | -2.334592 | 3.409997  |
| H | -1.110713 | -2.085262 | 4.987296  |
| H | 0.848407  | -4.966449 | 3.546846  |
| H | -0.258442 | -4.493935 | 4.847859  |
| H | -0.873779 | -4.711544 | 3.194949  |
| H | 1.153891  | -2.656229 | 5.455527  |
| H | 2.339010  | -3.013037 | 4.191038  |
| H | 1.647159  | -1.383307 | 4.334055  |
| C | 6.729873  | -0.145674 | 1.649445  |
| C | 7.016561  | 1.366795  | 1.695800  |
| C | 6.262882  | -0.567606 | 3.047877  |
| C | 8.033466  | -0.906327 | 1.344641  |
| H | 7.334555  | 1.720980  | 0.715324  |
| H | 6.118413  | 1.917358  | 2.000246  |
| H | 7.803460  | 1.580176  | 2.429350  |
| H | 6.093504  | -1.647527 | 3.114301  |
| H | 7.034225  | -0.306057 | 3.779823  |
| H | 5.337820  | -0.056487 | 3.338069  |
| H | 8.784373  | -0.692799 | 2.114958  |
| H | 7.849181  | -1.986220 | 1.341410  |
| H | 8.422826  | -0.610980 | 0.370590  |
| C | 5.219865  | -0.041030 | -3.279995 |

|   |          |           |           |
|---|----------|-----------|-----------|
| C | 5.635721 | 1.423510  | -3.505590 |
| C | 6.365011 | -0.960692 | -3.745821 |
| C | 4.002880 | -0.310109 | -4.173207 |
| H | 4.799748 | 2.094585  | -3.291376 |
| H | 6.476871 | 1.684440  | -2.865360 |
| H | 5.920326 | 1.568959  | -4.554825 |
| H | 6.076981 | -2.012120 | -3.639083 |
| H | 6.596030 | -0.774819 | -4.801739 |
| H | 7.258831 | -0.777231 | -3.147725 |
| H | 4.251993 | -0.059018 | -5.209743 |
| H | 3.699763 | -1.362402 | -4.150122 |
| H | 3.145747 | 0.302995  | -3.871584 |

Vibrational frequencies

|          |          |          |
|----------|----------|----------|
| 9.7007   | 17.4549  | 24.9219  |
| 29.5032  | 32.9904  | 36.1043  |
| 38.1430  | 43.6898  | 47.4436  |
| 52.0993  | 55.1139  | 59.0170  |
| 68.4137  | 72.3129  | 75.1213  |
| 77.0779  | 85.1969  | 89.6210  |
| 93.3251  | 95.5245  | 102.4230 |
| 107.1538 | 115.7326 | 120.7306 |
| 129.8045 | 130.9856 | 133.3296 |
| 141.4764 | 144.7448 | 149.9964 |
| 160.5537 | 164.0799 | 164.9889 |
| 168.6036 | 175.4656 | 176.0837 |
| 179.7272 | 192.7030 | 194.7900 |
| 197.7345 | 207.5762 | 212.4167 |
| 220.5173 | 223.6899 | 228.8791 |
| 233.7392 | 237.7097 | 243.3385 |
| 251.4892 | 254.5570 | 261.9652 |
| 264.4876 | 267.8923 | 270.2820 |
| 273.7537 | 283.3442 | 285.0488 |
| 292.0932 | 295.3459 | 298.4069 |
| 301.1101 | 309.3359 | 315.7680 |
| 322.2726 | 325.2481 | 330.1283 |
| 332.1546 | 334.6381 | 339.3855 |
| 340.7220 | 344.4906 | 347.0271 |
| 353.3091 | 359.2531 | 362.8276 |
| 367.8528 | 373.6898 | 380.1463 |
| 385.5997 | 386.8355 | 389.9302 |
| 393.8470 | 399.3755 | 400.9567 |
| 402.3162 | 404.9846 | 407.8835 |
| 409.9839 | 413.8005 | 414.7960 |
| 438.1196 | 440.9529 | 444.2737 |

|           |           |           |
|-----------|-----------|-----------|
| 447.2379  | 455.2973  | 465.0357  |
| 471.8691  | 475.8201  | 481.9672  |
| 492.8209  | 497.2825  | 505.4515  |
| 521.9945  | 524.8528  | 525.2898  |
| 531.6858  | 540.1042  | 551.4956  |
| 554.6679  | 556.0970  | 575.4377  |
| 583.4156  | 583.7961  | 586.9337  |
| 595.5680  | 607.8494  | 623.7573  |
| 629.1912  | 641.2298  | 641.5677  |
| 643.2021  | 648.3207  | 655.2860  |
| 663.0718  | 673.8956  | 681.6666  |
| 685.5812  | 692.9145  | 699.8400  |
| 716.0670  | 728.0037  | 752.1037  |
| 755.0891  | 767.9216  | 773.7804  |
| 775.6299  | 779.6516  | 783.1112  |
| 787.8129  | 791.3407  | 806.3062  |
| 806.9333  | 821.0738  | 837.1743  |
| 842.0790  | 842.6204  | 844.3606  |
| 856.9813  | 870.6377  | 874.8234  |
| 879.4192  | 883.4278  | 899.5556  |
| 902.6878  | 905.5519  | 919.1112  |
| 920.0775  | 922.4695  | 922.7583  |
| 929.0209  | 943.4890  | 945.3627  |
| 948.0268  | 949.1961  | 950.8379  |
| 951.0356  | 953.9377  | 955.4414  |
| 955.9182  | 957.5629  | 958.6529  |
| 958.8615  | 960.3634  | 964.3711  |
| 966.0839  | 969.7186  | 974.3552  |
| 975.9983  | 988.4689  | 990.4681  |
| 997.1153  | 1013.8128 | 1019.4526 |
| 1020.7986 | 1022.3581 | 1039.2750 |
| 1042.0411 | 1042.9716 | 1047.1909 |
| 1049.3452 | 1049.5651 | 1053.8632 |
| 1054.8534 | 1054.9650 | 1057.2001 |
| 1057.6368 | 1058.1083 | 1060.6495 |
| 1063.7933 | 1064.5735 | 1066.8947 |
| 1070.6884 | 1071.1645 | 1081.5788 |
| 1118.7938 | 1126.7386 | 1131.8370 |
| 1135.7378 | 1142.1784 | 1152.3353 |
| 1179.6941 | 1187.0481 | 1188.2508 |
| 1194.7854 | 1205.2045 | 1211.1685 |
| 1218.8566 | 1222.0990 | 1229.2681 |
| 1237.6878 | 1242.5820 | 1243.1398 |
| 1246.8640 | 1248.8115 | 1251.7285 |

|           |           |           |
|-----------|-----------|-----------|
| 1252.3305 | 1253.6680 | 1254.5801 |
| 1255.9469 | 1261.1017 | 1265.7805 |
| 1273.8649 | 1284.1194 | 1284.8365 |
| 1288.6217 | 1298.5001 | 1300.2471 |
| 1311.1987 | 1317.4696 | 1321.4642 |
| 1321.7507 | 1325.0348 | 1327.9030 |
| 1329.6818 | 1334.0250 | 1341.7041 |
| 1350.6101 | 1358.7304 | 1360.9126 |
| 1364.9747 | 1368.5744 | 1374.0672 |
| 1381.1552 | 1381.4102 | 1382.2881 |
| 1385.2624 | 1385.9333 | 1390.7036 |
| 1393.9893 | 1397.3631 | 1398.0546 |
| 1401.3333 | 1403.8662 | 1412.7711 |
| 1416.5349 | 1418.2240 | 1419.5949 |
| 1422.1808 | 1429.0696 | 1430.2481 |
| 1431.5954 | 1440.9943 | 1454.0489 |
| 1456.9468 | 1463.5087 | 1472.5974 |
| 1476.0877 | 1481.5085 | 1483.8848 |
| 1485.0853 | 1486.6188 | 1489.9707 |
| 1491.8124 | 1494.6636 | 1495.1806 |
| 1495.6084 | 1497.6481 | 1499.1628 |
| 1499.2551 | 1500.6218 | 1501.2573 |
| 1502.2983 | 1503.7939 | 1504.1972 |
| 1504.9911 | 1506.2775 | 1508.8092 |
| 1509.2486 | 1510.3315 | 1516.7135 |
| 1517.8274 | 1517.8800 | 1518.5012 |
| 1519.5993 | 1520.0720 | 1520.7940 |
| 1524.7229 | 1531.5451 | 1533.1726 |
| 1533.4300 | 1535.5285 | 1538.0186 |
| 1540.1349 | 1541.2069 | 1542.3161 |
| 1557.8445 | 1565.2039 | 1584.9546 |
| 1608.6818 | 1638.6088 | 1649.8845 |
| 1655.6457 | 1661.5385 | 1677.8897 |
| 1685.8713 | 1686.5633 | 1688.1701 |
| 1693.0442 | 1703.7820 | 1710.4587 |
| 2383.6657 | 3042.5562 | 3045.1435 |
| 3048.1579 | 3050.2009 | 3052.7698 |
| 3053.6055 | 3056.6312 | 3057.2618 |
| 3058.4218 | 3059.5949 | 3063.0864 |
| 3064.0071 | 3068.5247 | 3076.3101 |
| 3078.0971 | 3087.2385 | 3092.0896 |
| 3106.6604 | 3112.0134 | 3117.0058 |
| 3119.1380 | 3123.0816 | 3124.0545 |
| 3126.5061 | 3128.4715 | 3130.4864 |

|           |           |           |
|-----------|-----------|-----------|
| 3133.7024 | 3134.9660 | 3135.3698 |
| 3137.1140 | 3139.3437 | 3142.3447 |
| 3144.9785 | 3147.4064 | 3148.7406 |
| 3153.4050 | 3155.9706 | 3156.8079 |
| 3167.9186 | 3170.9280 | 3171.0756 |
| 3176.3194 | 3179.1884 | 3179.3311 |
| 3181.8283 | 3183.5606 | 3188.2810 |
| 3190.5354 | 3192.9888 | 3193.2126 |
| 3194.8613 | 3196.9978 | 3199.5180 |
| 3201.0496 | 3203.0360 | 3205.9553 |
| 3211.8405 | 3216.0089 | 3216.5128 |
| 3216.7872 | 3225.5580 | 3230.7785 |
| 3236.9761 | 3237.2073 | 3240.1206 |
| 3257.0292 | 3272.0755 | 3685.2674 |

## R2

Zero-point correction= 0.157609

Thermal correction to Energy= 0.168158

Thermal correction to Enthalpy= 0.169102

Thermal correction to Gibbs Free Energy= 0.120174

Sum of electronic and zero-point Energies= -460.001241

Sum of electronic and thermal Energies= -459.990692

Sum of electronic and thermal Enthalpies= -459.989748

Sum of electronic and thermal Free Energies= -460.038676

Cartesian coordinates

|   |           |           |           |
|---|-----------|-----------|-----------|
| C | -2.823960 | 0.919313  | 0.622341  |
| C | -2.240420 | -0.327615 | 0.012729  |
| H | -3.761826 | 1.170914  | 0.128317  |
| H | -3.000256 | 0.753332  | 1.689988  |
| H | -2.109722 | 1.740816  | 0.526096  |
| C | -0.871419 | -0.763166 | 0.516971  |
| C | 0.222224  | 0.123546  | -0.041824 |
| H | -0.820753 | -0.709855 | 1.610163  |
| H | -0.681015 | -1.795006 | 0.214802  |
| O | 1.428547  | -0.365264 | 0.245855  |
| O | -2.815505 | -0.976870 | -0.833005 |
| O | 0.037542  | 1.142298  | -0.667706 |
| C | 2.549208  | 0.400923  | -0.240316 |
| C | 3.804560  | -0.337357 | 0.164716  |
| H | 2.459265  | 0.498757  | -1.325489 |
| H | 2.500702  | 1.402932  | 0.194930  |
| H | 4.682278  | 0.211917  | -0.182608 |
| H | 3.862482  | -0.432615 | 1.251214  |
| H | 3.823029  | -1.336364 | -0.276267 |

Vibrational frequencies

|           |           |           |
|-----------|-----------|-----------|
| 33.4988   | 55.8522   | 82.4971   |
| 104.2796  | 126.5427  | 149.7192  |
| 218.7625  | 265.7657  | 333.8085  |
| 379.2504  | 417.6896  | 503.5438  |
| 557.5953  | 595.7209  | 736.7014  |
| 816.1093  | 830.8834  | 899.8187  |
| 907.2519  | 979.7794  | 1039.7136 |
| 1049.9590 | 1090.5886 | 1150.7093 |
| 1182.7081 | 1188.5497 | 1231.2114 |
| 1292.1723 | 1309.6150 | 1370.1088 |
| 1399.4754 | 1411.2880 | 1443.9330 |
| 1448.9219 | 1470.0450 | 1482.3471 |
| 1492.0097 | 1504.8200 | 1531.9985 |
| 1845.5354 | 1872.6421 | 3075.2784 |
| 3082.4567 | 3096.8664 | 3106.9576 |
| 3153.0104 | 3158.1338 | 3165.6488 |
| 3170.5116 | 3175.2718 | 3194.7231 |

**LiCl**

Zero-point correction= 0.001002

Thermal correction to Energy= 0.003635

Thermal correction to Enthalpy= 0.004579

Thermal correction to Gibbs Free Energy= -0.019946

Sum of electronic and zero-point Energies= -467.812045

Sum of electronic and thermal Energies= -467.809412

Sum of electronic and thermal Enthalpies= -467.808468

Sum of electronic and thermal Free Energies= -467.832993

Cartesian coordinates

|    |          |          |           |
|----|----------|----------|-----------|
| Cl | 0.000000 | 0.000000 | 0.333819  |
| Li | 0.000000 | 0.000000 | -1.891641 |

Vibrational frequencies

439.8802

**THF**

Zero-point correction= 0.118363

Thermal correction to Energy= 0.123201

Thermal correction to Enthalpy= 0.124145

Thermal correction to Gibbs Free Energy= 0.090046

Sum of electronic and zero-point Energies= -232.229403

Sum of electronic and thermal Energies= -232.224565

Sum of electronic and thermal Enthalpies= -232.223620

Sum of electronic and thermal Free Energies= -232.257720

Cartesian coordinates

|   |           |           |           |
|---|-----------|-----------|-----------|
| C | -1.135731 | -0.455614 | 0.145980  |
| O | -0.012055 | -1.195285 | -0.304751 |
| C | 1.114542  | -0.483782 | 0.177974  |
| C | 0.790901  | 0.996369  | -0.072361 |
| C | -0.756381 | 1.027125  | -0.030928 |
| H | -2.004196 | -0.763219 | -0.439741 |
| H | -1.328312 | -0.678415 | 1.207023  |
| H | 1.246793  | -0.673172 | 1.254256  |
| H | 1.999461  | -0.842083 | -0.353187 |
| H | 1.249240  | 1.646814  | 0.675442  |
| H | 1.156544  | 1.304436  | -1.055406 |
| H | -1.140903 | 1.638011  | 0.789057  |
| H | -1.162177 | 1.425326  | -0.963426 |

Vibrational frequencies

|           |           |           |
|-----------|-----------|-----------|
| 51.9169   | 298.7829  | 637.6275  |
| 660.0439  | 807.2230  | 877.0046  |
| 926.4658  | 955.3435  | 964.0938  |
| 999.2622  | 1063.5367 | 1149.2475 |
| 1166.7577 | 1223.5908 | 1242.7908 |
| 1268.4023 | 1287.8325 | 1323.1391 |
| 1329.6303 | 1377.7100 | 1415.9037 |
| 1495.5611 | 1513.9793 | 1520.1224 |
| 1539.6308 | 3026.5468 | 3030.6084 |
| 3094.6094 | 3105.7109 | 3139.4961 |
| 3146.3546 | 3152.5164 | 3163.7425 |

LiCl·3THF

Zero-point correction= 0.362187

Thermal correction to Energy= 0.382634

Thermal correction to Enthalpy= 0.383578

Thermal correction to Gibbs Free Energy= 0.309706

Sum of electronic and zero-point Energies= -1164.560209

Sum of electronic and thermal Energies= -1164.539762

Sum of electronic and thermal Enthalpies= -1164.538818

Sum of electronic and thermal Free Energies= -1164.612689

Cartesian coordinates

|    |           |           |           |
|----|-----------|-----------|-----------|
| Li | -0.028984 | -0.585927 | 0.835196  |
| Cl | 0.825770  | -1.129874 | 2.838378  |
| C  | -2.938830 | -0.172164 | 0.884810  |
| C  | -2.182638 | -1.292214 | -1.054972 |
| C  | -3.900044 | 0.135157  | -0.257717 |
| H  | -2.538944 | 0.714876  | 1.384688  |
| H  | -3.399908 | -0.825155 | 1.633819  |
| C  | -3.687920 | -1.075771 | -1.170111 |



|   |           |           |           |
|---|-----------|-----------|-----------|
| H | -1.869503 | -2.330462 | -1.181879 |
| H | -1.632701 | -0.669340 | -1.773163 |
| H | -4.929621 | 0.246864  | 0.085659  |
| H | -3.602993 | 1.056010  | -0.770769 |
| H | -4.226397 | -1.943683 | -0.777767 |
| H | -4.005086 | -0.905828 | -2.200281 |
| C | 1.276397  | -0.615883 | -1.808184 |
| C | 2.062950  | -2.242155 | -0.361608 |
| C | 2.817979  | -0.584826 | -1.895415 |
| H | 0.830642  | 0.373373  | -1.675964 |
| H | 0.830837  | -1.090748 | -2.689631 |
| C | 3.269976  | -1.361045 | -0.646005 |
| H | 2.031376  | -3.111417 | -1.032293 |
| H | 1.969398  | -2.561955 | 0.676781  |
| H | 3.155488  | -1.087626 | -2.804563 |
| H | 3.206172  | 0.435753  | -1.914993 |
| H | 4.184721  | -1.933000 | -0.810138 |
| H | 3.428538  | -0.685899 | 0.200777  |
| O | -1.840709 | -0.873655 | 0.276313  |
| O | 0.949824  | -1.384719 | -0.643260 |
| C | 1.390743  | 1.905425  | 0.795148  |
| C | -0.670641 | 2.170390  | -0.327629 |
| C | 1.266164  | 3.356383  | 0.347331  |
| H | 2.149700  | 1.369499  | 0.207651  |
| H | 1.606227  | 1.769780  | 1.856244  |
| C | 0.303284  | 3.229832  | -0.836047 |
| H | -1.477378 | 2.620789  | 0.263503  |
| H | -1.114780 | 1.558099  | -1.119963 |
| H | 0.816774  | 3.960894  | 1.140939  |
| H | 2.229380  | 3.792962  | 0.078748  |
| H | -0.198651 | 4.163355  | -1.094790 |
| H | 0.837889  | 2.866439  | -1.720583 |
| O | 0.106281  | 1.316286  | 0.524740  |

Vibrational frequencies

|          |          |          |
|----------|----------|----------|
| 25.5298  | 37.8371  | 48.7386  |
| 51.9923  | 59.6129  | 68.8939  |
| 76.9808  | 85.8252  | 89.2272  |
| 102.0091 | 107.8783 | 117.0169 |
| 127.2952 | 133.8125 | 148.9329 |
| 167.1335 | 169.9727 | 183.5487 |
| 272.0027 | 279.7653 | 298.5028 |
| 433.0078 | 484.0958 | 526.8005 |
| 576.1615 | 577.1776 | 597.9325 |
| 697.3368 | 703.3754 | 707.3053 |

|           |           |           |
|-----------|-----------|-----------|
| 811.1100  | 862.1491  | 866.3581  |
| 889.2093  | 889.5080  | 892.0057  |
| 930.2464  | 933.0070  | 936.5723  |
| 943.3838  | 945.5700  | 947.5440  |
| 949.3928  | 953.9405  | 968.0255  |
| 971.8670  | 975.7552  | 978.0243  |
| 1050.8957 | 1054.6152 | 1059.3924 |
| 1129.2464 | 1134.2339 | 1134.8504 |
| 1160.2859 | 1172.4318 | 1174.0234 |
| 1201.3198 | 1201.7949 | 1205.9798 |
| 1209.8393 | 1216.3079 | 1244.7807 |
| 1255.9088 | 1267.0814 | 1270.6717 |
| 1272.0175 | 1275.1640 | 1296.9549 |
| 1318.2542 | 1320.5300 | 1323.1520 |
| 1338.4515 | 1353.7963 | 1354.5955 |
| 1378.9709 | 1381.4076 | 1383.8679 |
| 1411.8232 | 1414.3875 | 1417.5460 |
| 1490.1168 | 1490.5116 | 1490.6634 |
| 1501.5102 | 1502.7065 | 1506.9514 |
| 1513.0721 | 1527.1810 | 1533.7214 |
| 1539.2972 | 1544.1845 | 1548.1531 |
| 3054.3860 | 3054.9779 | 3064.3699 |
| 3069.7466 | 3077.7908 | 3082.9032 |
| 3083.2941 | 3086.9338 | 3092.0961 |
| 3094.6649 | 3096.7203 | 3101.8835 |
| 3121.8293 | 3138.8257 | 3145.3057 |
| 3146.3648 | 3156.4156 | 3157.3462 |
| 3157.4231 | 3159.1587 | 3164.0172 |
| 3165.3194 | 3165.9612 | 3171.8928 |

## R2<sup>1</sup>

Zero-point correction= 0.282008

Thermal correction to Energy= 0.301808

Thermal correction to Enthalpy= 0.302752

Thermal correction to Gibbs Free Energy= 0.229467

Sum of electronic and zero-point Energies= -1160.086608

Sum of electronic and thermal Energies= -1160.066808

Sum of electronic and thermal Enthalpies= -1160.065864

Sum of electronic and thermal Free Energies= -1160.139148

Cartesian coordinates

|   |           |          |           |
|---|-----------|----------|-----------|
| C | -0.934570 | 3.699457 | 0.608595  |
| C | -0.761283 | 2.236708 | 0.330255  |
| H | -0.023616 | 4.109096 | 1.041951  |
| H | -1.200479 | 4.231657 | -0.308802 |

|    |           |           |           |
|----|-----------|-----------|-----------|
| H  | -1.767061 | 3.826121  | 1.308742  |
| C  | -1.844818 | 1.591734  | -0.518632 |
| C  | -2.038693 | 0.110416  | -0.300787 |
| O  | -3.311064 | -0.228542 | -0.378518 |
| O  | 0.202513  | 1.615263  | 0.738722  |
| O  | -1.144606 | -0.693076 | -0.106672 |
| C  | -3.614851 | -1.637815 | -0.235881 |
| C  | -5.115793 | -1.779013 | -0.330312 |
| H  | -3.094615 | -2.179444 | -1.029690 |
| H  | -3.223404 | -1.976271 | 0.726132  |
| H  | -5.387053 | -2.832170 | -0.232470 |
| H  | -5.607159 | -1.218945 | 0.467894  |
| H  | -5.479414 | -1.414697 | -1.293320 |
| Li | 0.665146  | -0.267592 | 0.467988  |
| Cl | 1.581880  | -1.393160 | 2.160794  |
| H  | -2.794551 | 2.114572  | -0.399156 |
| O  | 1.816584  | -0.145253 | -1.097647 |
| C  | 2.811839  | 0.883810  | -1.085170 |
| C  | 2.516574  | -1.379867 | -1.329609 |
| C  | 3.960504  | 0.276005  | -0.288915 |
| H  | 3.109364  | 1.108251  | -2.118455 |
| H  | 2.363973  | 1.771129  | -0.634149 |
| C  | 3.912060  | -1.210896 | -0.697056 |
| H  | 1.927804  | -2.178389 | -0.873055 |
| H  | 2.579580  | -1.546743 | -2.411074 |
| H  | 3.753375  | 0.375799  | 0.779217  |
| H  | 4.918287  | 0.750091  | -0.510835 |
| H  | 4.027812  | -1.858022 | 0.172992  |
| H  | 4.692712  | -1.455654 | -1.420631 |
| H  | -1.536181 | 1.729745  | -1.564760 |

Vibrational frequencies

|          |          |          |
|----------|----------|----------|
| 16.4430  | 18.3146  | 30.9992  |
| 48.5879  | 60.0535  | 79.6675  |
| 85.7032  | 89.3075  | 97.0723  |
| 112.6070 | 117.5262 | 133.8019 |
| 143.9335 | 159.5156 | 172.6574 |
| 180.7054 | 257.7684 | 277.1351 |
| 314.6510 | 324.6070 | 364.4970 |
| 401.8097 | 433.9477 | 459.7607 |
| 477.8971 | 526.3058 | 590.0343 |
| 606.9276 | 612.5736 | 693.3572 |
| 782.3957 | 796.2994 | 824.3654 |
| 851.4165 | 871.7697 | 882.3964 |
| 929.1484 | 933.5006 | 958.8777 |

|           |           |           |
|-----------|-----------|-----------|
| 963.1348  | 978.4967  | 990.5233  |
| 1023.6554 | 1058.9228 | 1067.6023 |
| 1084.6193 | 1126.9414 | 1152.2755 |
| 1158.4981 | 1186.7749 | 1198.3705 |
| 1217.4507 | 1226.8315 | 1250.5160 |
| 1262.2266 | 1309.5884 | 1315.7534 |
| 1321.6016 | 1332.2565 | 1338.8901 |
| 1383.6025 | 1392.2028 | 1408.2769 |
| 1414.7325 | 1425.0109 | 1436.1824 |
| 1460.8496 | 1470.3153 | 1478.1875 |
| 1488.1633 | 1493.7354 | 1504.1041 |
| 1505.1680 | 1520.9329 | 1528.6399 |
| 1537.4966 | 1799.5480 | 1854.3180 |
| 3063.0231 | 3071.7040 | 3074.3430 |
| 3076.5285 | 3088.1066 | 3104.6256 |
| 3108.5476 | 3115.4300 | 3147.7659 |
| 3154.3047 | 3158.9731 | 3164.0153 |
| 3165.5300 | 3170.0070 | 3172.6746 |
| 3174.3928 | 3185.4779 | 3206.9696 |

## R2<sup>1</sup>

Zero-point correction= 0.269359

Thermal correction to Energy= 0.288663

Thermal correction to Enthalpy= 0.289607

Thermal correction to Gibbs Free Energy= 0.218463

Sum of electronic and zero-point Energies= -1159.628974

Sum of electronic and thermal Energies= -1159.609670

Sum of electronic and thermal Enthalpies= -1159.608726

Sum of electronic and thermal Free Energies= -1159.679870

Cartesian coordinates

|   |           |           |           |
|---|-----------|-----------|-----------|
| C | -0.738541 | 3.816222  | 0.059880  |
| C | -0.736373 | 2.307326  | 0.229942  |
| H | 0.060941  | 4.096416  | -0.632749 |
| H | -1.688565 | 4.203863  | -0.311324 |
| H | -0.510038 | 4.283644  | 1.022149  |
| C | -1.909754 | 1.614529  | -0.081977 |
| C | -2.045342 | 0.209075  | 0.071682  |
| O | -3.288979 | -0.236987 | -0.254703 |
| O | 0.345908  | 1.797867  | 0.648353  |
| O | -1.192047 | -0.607761 | 0.457700  |
| C | -3.508529 | -1.642881 | -0.134880 |
| C | -4.921998 | -1.915946 | -0.604481 |
| H | -2.772144 | -2.181247 | -0.739791 |
| H | -3.363923 | -1.948661 | 0.906511  |

|    |           |           |           |
|----|-----------|-----------|-----------|
| H  | -5.143024 | -2.983283 | -0.529191 |
| H  | -5.643163 | -1.368029 | 0.006712  |
| H  | -5.046501 | -1.608198 | -1.645568 |
| Li | 0.616045  | -0.050518 | 0.676487  |
| Cl | 1.891434  | -1.093131 | 2.270128  |
| H  | -2.778212 | 2.159348  | -0.426556 |
| O  | 1.499243  | -0.364542 | -1.085907 |
| C  | 2.446656  | 0.649482  | -1.423919 |
| C  | 2.187029  | -1.617118 | -1.177941 |
| C  | 3.727067  | 0.205796  | -0.723922 |
| H  | 2.576655  | 0.677930  | -2.515644 |
| H  | 2.039147  | 1.597706  | -1.070538 |
| C  | 3.664500  | -1.330581 | -0.840001 |
| H  | 1.710307  | -2.300450 | -0.472839 |
| H  | 2.077396  | -2.007763 | -2.197588 |
| H  | 3.685823  | 0.501991  | 0.327128  |
| H  | 4.623128  | 0.633787  | -1.178402 |
| H  | 3.948730  | -1.806458 | 0.099190  |
| H  | 4.319636  | -1.699853 | -1.632978 |

Vibrational frequencies

|           |           |           |
|-----------|-----------|-----------|
| 17.1611   | 35.6356   | 46.7146   |
| 49.8488   | 58.3546   | 68.4367   |
| 90.0774   | 95.9766   | 119.9237  |
| 128.4328  | 138.0728  | 145.7290  |
| 163.2181  | 166.3015  | 178.9276  |
| 182.7722  | 257.7209  | 268.5581  |
| 312.8521  | 331.6724  | 392.2271  |
| 423.8731  | 426.0411  | 465.6542  |
| 537.3167  | 603.4927  | 608.2448  |
| 617.9735  | 700.2134  | 735.0798  |
| 781.7716  | 791.1722  | 809.2890  |
| 809.4279  | 889.4549  | 898.9322  |
| 935.6737  | 958.9652  | 970.8418  |
| 983.7284  | 989.3169  | 1001.4182 |
| 1048.4926 | 1053.6197 | 1069.7949 |
| 1130.7349 | 1138.6991 | 1153.6702 |
| 1160.6741 | 1185.0016 | 1195.1539 |
| 1226.2965 | 1247.9672 | 1262.6282 |
| 1296.9606 | 1298.0407 | 1303.5113 |
| 1320.4616 | 1341.9957 | 1381.5694 |
| 1389.3134 | 1399.6530 | 1413.0631 |
| 1434.2114 | 1477.1901 | 1481.6803 |
| 1491.5932 | 1494.5113 | 1503.6954 |
| 1508.8135 | 1512.2468 | 1528.7791 |

|           |           |           |
|-----------|-----------|-----------|
| 1531.1263 | 1556.8418 | 1581.6350 |
| 1733.4968 | 3040.9926 | 3055.9330 |
| 3065.8718 | 3072.0907 | 3082.5225 |
| 3097.2210 | 3105.6877 | 3124.7956 |
| 3136.7519 | 3153.9750 | 3158.4195 |
| 3160.7883 | 3162.6983 | 3170.7284 |
| 3179.4431 | 3181.5936 | 3245.7241 |

### TS3'

Zero-point correction= 0.817256

Thermal correction to Energy= 0.867265

Thermal correction to Enthalpy= 0.868210

Thermal correction to Gibbs Free Energy= 0.734370

Sum of electronic and zero-point Energies= -2726.533239

Sum of electronic and thermal Energies= -2726.483229

Sum of electronic and thermal Enthalpies= -2726.482285

Sum of electronic and thermal Free Energies= -2726.616125

Cartesian coordinates

|   |           |           |           |
|---|-----------|-----------|-----------|
| C | 1.530195  | -0.459141 | -1.228304 |
| C | 0.297695  | -0.591510 | -0.719606 |
| C | -0.295200 | -0.023248 | 0.500707  |
| O | 2.013606  | -1.198649 | -2.282384 |
| C | -1.450282 | 0.901782  | 0.327674  |
| C | -1.785185 | 1.834045  | 1.319340  |
| C | -2.286069 | 0.796438  | -0.792636 |
| C | -2.918922 | 2.629902  | 1.196270  |
| H | -1.147741 | 1.940355  | 2.194487  |
| C | -3.426100 | 1.584529  | -0.906929 |
| H | -2.065985 | 0.076782  | -1.572744 |
| C | -3.750111 | 2.507685  | 0.084432  |
| H | -3.151009 | 3.351911  | 1.975111  |
| H | -4.064532 | 1.467582  | -1.777864 |
| H | -4.635983 | 3.128903  | -0.008132 |
| C | 0.647383  | 0.338636  | 1.513414  |
| N | 1.392756  | 0.530807  | 2.387857  |
| H | -0.362269 | -1.303817 | -1.225305 |
| C | 2.549280  | 0.531828  | -0.853571 |
| C | 4.492482  | 1.483671  | -0.551856 |
| C | 4.606950  | -0.989496 | -0.865297 |
| H | 4.221034  | -1.508323 | -1.745689 |
| N | 3.628685  | 2.454942  | -0.517252 |
| N | 2.423275  | 1.856436  | -0.712527 |
| N | 3.875768  | 0.284541  | -0.766184 |
| C | 5.985986  | 1.569875  | -0.460717 |

|   |           |           |           |
|---|-----------|-----------|-----------|
| H | 6.268602  | 2.282441  | 0.314968  |
| H | 6.381230  | 1.919080  | -1.425076 |
| C | 6.123453  | -0.714911 | -1.014497 |
| O | 6.512896  | 0.312794  | -0.115292 |
| C | 5.785461  | -2.480180 | 0.542828  |
| C | 4.546097  | -1.862875 | 0.367917  |
| C | 3.485175  | -2.105665 | 1.226510  |
| C | 3.678269  | -3.003437 | 2.277252  |
| C | 4.908429  | -3.638227 | 2.449075  |
| C | 5.973467  | -3.378466 | 1.584631  |
| C | 6.765200  | -2.009467 | -0.507961 |
| H | 2.534238  | -1.597011 | 1.106388  |
| H | 5.043027  | -4.332849 | 3.271795  |
| H | 6.935375  | -3.859384 | 1.733749  |
| H | 6.850624  | -2.732820 | -1.326040 |
| H | 7.766950  | -1.811747 | -0.120246 |
| C | 1.250935  | 2.688871  | -0.810105 |
| C | 0.467702  | 2.645721  | -1.969239 |
| C | 0.999594  | 3.576004  | 0.249382  |
| C | -0.643195 | 3.489644  | -2.014951 |
| C | -0.111851 | 4.403223  | 0.131774  |
| C | -0.953880 | 4.366347  | -0.981034 |
| H | -1.277609 | 3.459224  | -2.897598 |
| H | -0.338192 | 5.085334  | 0.947826  |
| C | 1.882410  | 3.681937  | 1.465993  |
| H | 2.747934  | 4.317096  | 1.257268  |
| H | 2.249095  | 2.708144  | 1.793097  |
| H | 1.319136  | 4.128901  | 2.287701  |
| C | -2.145971 | 5.280434  | -1.072744 |
| H | -1.852666 | 6.259391  | -1.466459 |
| H | -2.593969 | 5.434912  | -0.088279 |
| H | -2.908407 | 4.862848  | -1.734042 |
| C | 0.760219  | 1.776506  | -3.165004 |
| H | 0.132669  | 0.879527  | -3.155562 |
| H | 1.801404  | 1.449740  | -3.213748 |
| H | 0.537935  | 2.330581  | -4.079294 |
| H | 6.399531  | -0.445913 | -2.041594 |
| H | 2.865541  | -3.203910 | 2.968170  |
| C | -1.962187 | -1.237186 | 2.413082  |
| C | -1.229333 | -1.732527 | 1.155362  |
| C | -3.313030 | -0.584924 | 2.251635  |
| H | -2.160163 | -2.137668 | 3.013802  |
| C | -0.029791 | -2.592146 | 1.537696  |
| O | -1.905078 | -2.117861 | 0.149065  |

|    |           |           |           |
|----|-----------|-----------|-----------|
| O  | -3.586321 | 0.198876  | 3.292254  |
| O  | -4.121374 | -0.787535 | 1.363515  |
| H  | 0.592213  | -2.128530 | 2.308109  |
| H  | -0.415916 | -3.540993 | 1.926187  |
| H  | 0.571268  | -2.813104 | 0.652158  |
| Li | -3.746843 | -2.028902 | -0.099177 |
| C  | -4.886285 | 0.818501  | 3.304619  |
| O  | -3.957762 | -1.543119 | -1.995520 |
| Cl | -4.918108 | -3.993392 | 0.101241  |
| C  | -4.910075 | 1.770643  | 4.478813  |
| H  | -5.030742 | 1.335477  | 2.352736  |
| H  | -5.644647 | 0.035074  | 3.392135  |
| C  | -5.297947 | -1.607493 | -2.514470 |
| C  | -3.087233 | -2.390709 | -2.765734 |
| H  | -4.139300 | 2.536851  | 4.364152  |
| H  | -5.883687 | 2.262369  | 4.536256  |
| H  | -4.734558 | 1.237161  | 5.415608  |
| C  | -5.309110 | -2.793111 | -3.470879 |
| H  | -5.984250 | -1.727735 | -1.672582 |
| H  | -5.515540 | -0.665372 | -3.033026 |
| C  | -3.879013 | -2.764113 | -4.014932 |
| H  | -2.167078 | -1.835578 | -2.975921 |
| H  | -2.840541 | -3.275367 | -2.167891 |
| H  | -6.073052 | -2.699262 | -4.244956 |
| H  | -5.478525 | -3.712503 | -2.903764 |
| H  | -3.555407 | -3.716678 | -4.438293 |
| H  | -3.775948 | -1.988565 | -4.780701 |
| H  | 1.469252  | -1.989737 | -2.392853 |
| H  | -1.325791 | -0.595902 | 3.028362  |

Vibrational frequencies

|           |          |          |
|-----------|----------|----------|
| -254.3344 | 20.0334  | 23.9564  |
| 26.8600   | 37.7429  | 40.1538  |
| 43.8155   | 46.0723  | 55.6942  |
| 60.2496   | 66.9974  | 68.9309  |
| 69.4814   | 78.3236  | 82.6851  |
| 86.2552   | 93.5662  | 98.0405  |
| 102.6213  | 111.3852 | 115.4847 |
| 117.8085  | 123.0293 | 129.0431 |
| 130.6346  | 135.6526 | 138.2942 |
| 144.9687  | 149.3145 | 157.2806 |
| 161.2165  | 172.2134 | 173.8843 |
| 184.0325  | 194.0366 | 199.0618 |
| 211.4929  | 214.9481 | 219.8392 |
| 226.1577  | 241.1253 | 246.3156 |



|           |           |           |
|-----------|-----------|-----------|
| 250.4341  | 261.5536  | 268.6645  |
| 275.1972  | 279.6110  | 283.0428  |
| 286.5738  | 295.6453  | 298.7271  |
| 309.5243  | 316.8946  | 321.0614  |
| 328.8690  | 334.6227  | 343.0763  |
| 350.3759  | 359.8618  | 367.6679  |
| 385.7971  | 391.5698  | 403.0195  |
| 409.9536  | 423.4506  | 429.1877  |
| 434.5143  | 442.3715  | 453.4449  |
| 478.2674  | 479.4549  | 485.4774  |
| 495.4315  | 504.3772  | 509.2347  |
| 525.2844  | 529.8656  | 540.2003  |
| 551.2072  | 554.5445  | 575.2330  |
| 578.5355  | 580.3653  | 586.1296  |
| 589.9615  | 593.4133  | 609.9546  |
| 624.3097  | 629.9743  | 630.6167  |
| 646.3660  | 654.9070  | 669.3896  |
| 686.2787  | 686.6816  | 706.7390  |
| 708.4697  | 726.4601  | 750.4435  |
| 754.8164  | 764.2296  | 773.8535  |
| 778.6048  | 785.0480  | 809.8542  |
| 817.5478  | 819.6837  | 843.6783  |
| 849.7397  | 857.6595  | 860.8526  |
| 874.3295  | 879.0066  | 882.4664  |
| 891.9043  | 900.4658  | 901.5533  |
| 915.7326  | 921.2217  | 922.2587  |
| 928.3865  | 936.8242  | 941.0377  |
| 946.9244  | 951.8536  | 958.5101  |
| 971.0508  | 975.8433  | 978.8087  |
| 981.8851  | 984.5477  | 987.6739  |
| 1001.5785 | 1007.2891 | 1017.4105 |
| 1018.0433 | 1020.1330 | 1024.8028 |
| 1042.5901 | 1047.2532 | 1048.6995 |
| 1053.1772 | 1054.8877 | 1055.3139 |
| 1059.9180 | 1063.8414 | 1065.9091 |
| 1068.0879 | 1071.5847 | 1076.1304 |
| 1082.1716 | 1096.5577 | 1117.5016 |
| 1121.0452 | 1128.8343 | 1132.1343 |
| 1152.3862 | 1169.4036 | 1174.1115 |
| 1176.5389 | 1179.1375 | 1184.2364 |
| 1187.9661 | 1188.9278 | 1196.9439 |
| 1208.5885 | 1212.5077 | 1213.2525 |
| 1216.0036 | 1222.2241 | 1227.5984 |
| 1238.6078 | 1252.3337 | 1256.1224 |

|           |           |           |
|-----------|-----------|-----------|
| 1265.4244 | 1274.1124 | 1276.2910 |
| 1280.6484 | 1286.8545 | 1292.4862 |
| 1295.0032 | 1307.0011 | 1311.9848 |
| 1317.7545 | 1319.0300 | 1325.3628 |
| 1329.0362 | 1340.8939 | 1342.4153 |
| 1346.9039 | 1359.3983 | 1364.8972 |
| 1366.7559 | 1372.0253 | 1378.6099 |
| 1382.0431 | 1387.8465 | 1391.3513 |
| 1398.5932 | 1409.1759 | 1414.2413 |
| 1418.5006 | 1419.2892 | 1420.2743 |
| 1420.6441 | 1430.2972 | 1440.1929 |
| 1460.4686 | 1462.8805 | 1464.7706 |
| 1472.3490 | 1478.5755 | 1487.9233 |
| 1488.4727 | 1489.7090 | 1490.3694 |
| 1492.9493 | 1493.5686 | 1494.2171 |
| 1496.6251 | 1497.9419 | 1502.5141 |
| 1506.2361 | 1507.8219 | 1518.2447 |
| 1519.5244 | 1520.9184 | 1522.1251 |
| 1533.0559 | 1535.6954 | 1540.6096 |
| 1541.9307 | 1545.0663 | 1559.3933 |
| 1596.4722 | 1664.0355 | 1675.5309 |
| 1683.8781 | 1689.8808 | 1691.7004 |
| 1700.8639 | 1710.1700 | 1749.8163 |
| 1818.0002 | 2334.9915 | 3053.2239 |
| 3059.5044 | 3060.7896 | 3067.7107 |
| 3068.6942 | 3079.4917 | 3080.7554 |
| 3080.9054 | 3083.6018 | 3087.4344 |
| 3092.2630 | 3095.8242 | 3103.7554 |
| 3105.8523 | 3124.8665 | 3129.2372 |
| 3139.9798 | 3143.6208 | 3147.0609 |
| 3152.2244 | 3153.0888 | 3153.7739 |
| 3154.0424 | 3154.7702 | 3157.0358 |
| 3158.9874 | 3167.6015 | 3168.3734 |
| 3168.8060 | 3169.0439 | 3170.6687 |
| 3174.2125 | 3176.3514 | 3179.8193 |
| 3188.9558 | 3190.4679 | 3191.1190 |
| 3196.9582 | 3205.8627 | 3206.2215 |
| 3212.2777 | 3218.1048 | 3228.9229 |
| 3235.0015 | 3242.8047 | 3858.4526 |

### **M3'**

Zero-point correction= 0.818579

Thermal correction to Energy= 0.868824

Thermal correction to Enthalpy= 0.869769

Thermal correction to Gibbs Free Energy= 0.735337  
Sum of electronic and zero-point Energies= -2726.534930  
Sum of electronic and thermal Energies= -2726.484684  
Sum of electronic and thermal Enthalpies= -2726.483740  
Sum of electronic and thermal Free Energies= -2726.618171

Cartesian coordinates

|   |           |           |           |
|---|-----------|-----------|-----------|
| C | 1.568914  | -0.398518 | -1.317992 |
| C | 0.370124  | -0.679819 | -0.802412 |
| C | -0.297053 | -0.276733 | 0.479977  |
| O | 2.050554  | -0.960108 | -2.472881 |
| C | -1.384675 | 0.768089  | 0.287505  |
| C | -1.673377 | 1.697393  | 1.289822  |
| C | -2.207341 | 0.714145  | -0.841997 |
| C | -2.772920 | 2.543885  | 1.174648  |
| H | -1.045104 | 1.755204  | 2.175798  |
| C | -3.304510 | 1.561331  | -0.955391 |
| H | -2.028448 | -0.026849 | -1.611773 |
| C | -3.596499 | 2.475570  | 0.053888  |
| H | -2.981249 | 3.260212  | 1.965002  |
| H | -3.943006 | 1.485168  | -1.830136 |
| H | -4.456691 | 3.133014  | -0.031411 |
| C | 0.689589  | 0.135361  | 1.472503  |
| N | 1.483614  | 0.379007  | 2.281904  |
| H | -0.249546 | -1.394003 | -1.348895 |
| C | 2.585232  | 0.565812  | -0.847685 |
| C | 4.530886  | 1.476601  | -0.467060 |
| C | 4.635076  | -0.962592 | -0.988297 |
| H | 4.240201  | -1.399907 | -1.908321 |
| N | 3.671567  | 2.447925  | -0.363487 |
| N | 2.464472  | 1.873683  | -0.607158 |
| N | 3.907998  | 0.301557  | -0.773502 |
| C | 6.024772  | 1.548533  | -0.364116 |
| H | 6.307105  | 2.184658  | 0.475275  |
| H | 6.423324  | 1.984058  | -1.291078 |
| C | 6.151080  | -0.676696 | -1.123953 |
| O | 6.545404  | 0.262996  | -0.135078 |
| C | 5.825375  | -2.570671 | 0.274413  |
| C | 4.585573  | -1.939369 | 0.164882  |
| C | 3.532445  | -2.255119 | 1.007861  |
| C | 3.731752  | -3.239713 | 1.976383  |
| C | 4.962950  | -3.886118 | 2.083550  |
| C | 6.020685  | -3.554641 | 1.234675  |
| C | 6.794814  | -2.012349 | -0.742916 |
| H | 2.580335  | -1.741179 | 0.936537  |

|    |           |           |           |
|----|-----------|-----------|-----------|
| H  | 5.104017  | -4.647810 | 2.843315  |
| H  | 6.983020  | -4.047270 | 1.334281  |
| H  | 6.865749  | -2.659837 | -1.623537 |
| H  | 7.802317  | -1.852855 | -0.352694 |
| C  | 1.297040  | 2.719070  | -0.638012 |
| C  | 0.502522  | 2.755077  | -1.789778 |
| C  | 1.076845  | 3.557816  | 0.468409  |
| C  | -0.592648 | 3.620396  | -1.777434 |
| C  | -0.014012 | 4.417261  | 0.403214  |
| C  | -0.868120 | 4.454409  | -0.700225 |
| H  | -1.238516 | 3.645391  | -2.651628 |
| H  | -0.216113 | 5.063624  | 1.254025  |
| C  | 1.966916  | 3.580797  | 1.684431  |
| H  | 2.826069  | 4.236618  | 1.518003  |
| H  | 2.345029  | 2.589988  | 1.937747  |
| H  | 1.405224  | 3.962280  | 2.539584  |
| C  | -2.041908 | 5.395595  | -0.731297 |
| H  | -1.726781 | 6.394815  | -1.049445 |
| H  | -2.493949 | 5.488238  | 0.259400  |
| H  | -2.806743 | 5.043267  | -1.426749 |
| C  | 0.759600  | 1.951014  | -3.037374 |
| H  | 0.120247  | 1.062538  | -3.059701 |
| H  | 1.795006  | 1.617479  | -3.132030 |
| H  | 0.519636  | 2.557139  | -3.913056 |
| H  | 6.421546  | -0.313277 | -2.123025 |
| H  | 2.922207  | -3.499785 | 2.650850  |
| C  | -1.836787 | -1.394111 | 2.303500  |
| C  | -1.060586 | -1.715638 | 0.992993  |
| C  | -3.175882 | -0.707736 | 2.195682  |
| H  | -2.064174 | -2.367031 | 2.760401  |
| C  | 0.056773  | -2.706449 | 1.371473  |
| O  | -1.801983 | -2.161221 | -0.010513 |
| O  | -3.409369 | 0.065107  | 3.258106  |
| O  | -4.011541 | -0.872380 | 1.324804  |
| H  | 0.683027  | -2.363897 | 2.202564  |
| H  | -0.423589 | -3.645204 | 1.660352  |
| H  | 0.686661  | -2.912431 | 0.501052  |
| Li | -3.618443 | -2.110510 | -0.130535 |
| C  | -4.697216 | 0.704457  | 3.312087  |
| O  | -4.215360 | -1.367390 | -1.867909 |
| Cl | -4.939437 | -4.001545 | 0.068053  |
| C  | -4.683872 | 1.624373  | 4.512214  |
| H  | -4.853054 | 1.249852  | 2.377534  |
| H  | -5.467437 | -0.068165 | 3.392780  |

|   |           |           |           |
|---|-----------|-----------|-----------|
| C | -5.641581 | -1.191800 | -1.939758 |
| C | -3.768240 | -2.215649 | -2.937608 |
| H | -3.904610 | 2.382956  | 4.403386  |
| H | -5.648997 | 2.127408  | 4.604151  |
| H | -4.496367 | 1.062134  | 5.429752  |
| C | -6.125700 | -2.170149 | -3.004796 |
| H | -6.062660 | -1.391604 | -0.950904 |
| H | -5.846006 | -0.150708 | -2.219579 |
| C | -4.915919 | -2.239722 | -3.939892 |
| H | -2.837529 | -1.800355 | -3.335090 |
| H | -3.576299 | -3.217974 | -2.535363 |
| H | -7.040803 | -1.834192 | -3.496252 |
| H | -6.298527 | -3.147827 | -2.546802 |
| H | -4.901918 | -3.133191 | -4.566675 |
| H | -4.878138 | -1.356944 | -4.586661 |
| H | 1.486896  | -1.702613 | -2.732238 |
| H | -1.221505 | -0.844944 | 3.022721  |

Vibrational frequencies

|          |          |          |
|----------|----------|----------|
| 22.3257  | 25.0075  | 27.0042  |
| 31.0189  | 38.1609  | 44.6548  |
| 50.0901  | 58.0652  | 59.7948  |
| 63.1162  | 64.6425  | 68.2670  |
| 75.2659  | 80.3414  | 81.5704  |
| 89.9361  | 95.2994  | 96.9654  |
| 105.9347 | 113.0089 | 115.9398 |
| 120.9766 | 126.4742 | 130.9070 |
| 134.1896 | 139.1219 | 143.5941 |
| 153.0848 | 160.0563 | 162.9540 |
| 173.1088 | 176.2502 | 187.1306 |
| 192.2856 | 198.9649 | 213.4232 |
| 214.8728 | 221.1132 | 226.0736 |
| 242.8219 | 249.3247 | 253.6371 |
| 268.4723 | 277.2296 | 281.3630 |
| 286.0231 | 286.4256 | 289.8915 |
| 290.5177 | 300.6905 | 309.8596 |
| 311.5142 | 319.5638 | 326.6410 |
| 329.9075 | 347.1102 | 351.0955 |
| 355.2086 | 364.7935 | 380.4766 |
| 386.3444 | 397.2240 | 403.3353 |
| 414.4088 | 427.8031 | 429.7908 |
| 433.0460 | 443.1315 | 465.8125 |
| 478.8466 | 480.5396 | 492.6734 |
| 495.5895 | 506.9662 | 510.7893 |
| 524.7310 | 529.9334 | 547.3205 |

|           |           |           |
|-----------|-----------|-----------|
| 551.8089  | 556.7603  | 573.4025  |
| 581.4284  | 582.1099  | 588.9985  |
| 597.5884  | 612.1953  | 624.4796  |
| 631.7890  | 632.7819  | 650.8128  |
| 656.7175  | 669.3247  | 672.9000  |
| 686.3075  | 709.1854  | 710.2149  |
| 725.6614  | 730.0567  | 746.9078  |
| 752.3652  | 765.5790  | 777.4397  |
| 785.9544  | 802.5417  | 811.6862  |
| 816.3997  | 821.0227  | 842.2879  |
| 856.6894  | 863.6788  | 864.3292  |
| 874.8686  | 876.3003  | 882.7511  |
| 894.9075  | 897.8653  | 907.9298  |
| 919.2689  | 926.9589  | 928.0957  |
| 929.9330  | 933.0053  | 941.7508  |
| 948.5596  | 952.4279  | 958.4137  |
| 968.3820  | 971.7818  | 979.7108  |
| 980.5518  | 982.3215  | 983.4458  |
| 1004.4006 | 1009.4855 | 1015.4077 |
| 1021.3792 | 1025.5412 | 1026.9512 |
| 1043.1007 | 1046.0505 | 1049.2650 |
| 1054.2330 | 1055.0156 | 1058.0216 |
| 1062.0739 | 1064.4134 | 1068.2188 |
| 1071.2751 | 1076.7027 | 1082.7788 |
| 1086.7759 | 1097.4971 | 1119.2044 |
| 1121.5012 | 1128.0271 | 1133.9253 |
| 1153.1055 | 1153.8660 | 1174.9209 |
| 1178.5126 | 1180.8537 | 1183.3216 |
| 1185.8674 | 1188.5279 | 1195.0818 |
| 1207.1267 | 1211.6487 | 1212.9890 |
| 1214.7289 | 1221.4370 | 1223.3597 |
| 1238.0834 | 1240.8193 | 1253.9138 |
| 1256.0395 | 1267.9809 | 1276.2322 |
| 1277.8799 | 1283.7612 | 1289.9118 |
| 1290.6617 | 1293.8850 | 1310.5240 |
| 1315.4854 | 1318.7861 | 1325.9467 |
| 1327.8653 | 1338.0066 | 1339.9551 |
| 1344.2553 | 1347.8612 | 1362.3525 |
| 1366.5363 | 1366.9542 | 1373.2846 |
| 1380.3842 | 1388.5114 | 1389.5018 |
| 1390.8658 | 1393.2648 | 1410.8711 |
| 1415.6197 | 1416.9398 | 1420.1774 |
| 1421.4740 | 1423.5131 | 1428.6750 |
| 1447.1486 | 1462.1552 | 1462.9750 |

|           |           |           |
|-----------|-----------|-----------|
| 1463.4002 | 1471.9796 | 1476.2113 |
| 1486.7082 | 1488.6891 | 1492.6555 |
| 1492.8385 | 1493.4089 | 1495.3232 |
| 1499.2489 | 1499.4455 | 1501.3934 |
| 1501.8476 | 1507.6085 | 1510.1008 |
| 1517.9718 | 1518.3227 | 1518.7999 |
| 1522.4275 | 1531.7984 | 1535.1871 |
| 1538.6037 | 1540.6571 | 1547.4962 |
| 1603.9109 | 1671.2759 | 1673.0913 |
| 1683.6970 | 1688.3882 | 1695.8715 |
| 1699.4895 | 1709.5794 | 1775.3385 |
| 1819.4655 | 2383.2512 | 3057.8014 |
| 3066.3915 | 3066.4670 | 3068.3931 |
| 3068.7609 | 3078.4629 | 3079.5495 |
| 3081.0927 | 3081.1840 | 3090.3342 |
| 3091.5524 | 3101.4021 | 3103.3218 |
| 3107.8501 | 3133.0936 | 3133.1763 |
| 3141.3081 | 3142.6530 | 3145.4634 |
| 3149.0265 | 3150.4104 | 3150.8783 |
| 3151.2883 | 3154.5284 | 3155.2000 |
| 3156.5693 | 3163.7352 | 3167.2735 |
| 3169.8777 | 3171.3859 | 3171.4091 |
| 3172.0103 | 3178.9431 | 3185.0110 |
| 3189.7817 | 3194.5844 | 3201.1247 |
| 3207.2654 | 3208.7234 | 3210.8929 |
| 3218.0917 | 3219.5211 | 3241.5911 |
| 3245.1372 | 3255.2595 | 3853.1672 |

#### TS4

Zero-point correction= 1.436552

Thermal correction to Energy= 1.521258

Thermal correction to Enthalpy= 1.522202

Thermal correction to Gibbs Free Energy= 1.313436

Sum of electronic and zero-point Energies= -3966.940032

Sum of electronic and thermal Energies= -3966.855327

Sum of electronic and thermal Enthalpies= -3966.854383

Sum of electronic and thermal Free Energies= -3967.063149

Cartesian coordinates

|   |          |           |           |
|---|----------|-----------|-----------|
| C | 4.493624 | -0.010451 | 0.018116  |
| C | 3.036251 | -0.073528 | 0.081561  |
| C | 2.320868 | -1.150656 | 0.499015  |
| O | 5.119307 | 0.751555  | -0.696115 |
| C | 0.928940 | -1.129222 | 0.951539  |
| C | 0.248561 | -2.331117 | 1.208715  |

|   |           |           |           |
|---|-----------|-----------|-----------|
| C | 0.317150  | 0.093510  | 1.269152  |
| C | -1.015517 | -2.304994 | 1.778908  |
| H | 0.715541  | -3.282708 | 0.972057  |
| C | -0.954771 | 0.114331  | 1.821912  |
| H | 0.836481  | 1.031259  | 1.097297  |
| C | -1.615818 | -1.082912 | 2.089185  |
| H | -1.535798 | -3.235382 | 1.978748  |
| H | -1.435040 | 1.067841  | 2.022282  |
| H | -2.607996 | -1.063206 | 2.529697  |
| C | 2.986758  | -2.435398 | 0.508989  |
| N | 3.527518  | -3.456702 | 0.436054  |
| H | 2.537863  | 0.863138  | -0.161537 |
| C | 5.348010  | -0.794312 | 1.004422  |
| C | 7.114523  | -1.681021 | 1.911535  |
| C | 7.408123  | -1.047894 | -0.493348 |
| H | 7.329034  | -0.009195 | -0.820321 |
| N | 6.228824  | -1.621347 | 2.868336  |
| N | 5.133618  | -1.070123 | 2.295768  |
| N | 6.617478  | -1.162555 | 0.751540  |
| C | 8.519144  | -2.199062 | 1.975846  |
| H | 8.547863  | -3.103496 | 2.584133  |
| H | 9.164051  | -1.437487 | 2.435835  |
| C | 8.887362  | -1.417089 | -0.208000 |
| O | 8.946056  | -2.524659 | 0.677106  |
| C | 8.168218  | -2.479503 | -2.216848 |
| C | 7.012577  | -2.015035 | -1.587030 |
| C | 5.752148  | -2.410190 | -2.010469 |
| C | 5.656197  | -3.290997 | -3.087551 |
| C | 6.807246  | -3.753536 | -3.724559 |
| C | 8.072011  | -3.351322 | -3.293691 |
| C | 9.402302  | -1.899574 | -1.566478 |
| H | 4.846620  | -2.070539 | -1.517926 |
| H | 6.718020  | -4.440891 | -4.559254 |
| H | 8.966040  | -3.722199 | -3.785201 |
| H | 9.792036  | -1.053895 | -2.142816 |
| H | 10.210332 | -2.621379 | -1.429335 |
| C | 3.941826  | -0.875873 | 3.091457  |
| C | 3.420683  | 0.414105  | 3.239316  |
| C | 3.358333  | -2.011078 | 3.675943  |
| C | 2.221281  | 0.538756  | 3.939440  |
| C | 2.156271  | -1.820372 | 4.354507  |
| C | 1.562498  | -0.563678 | 4.480685  |
| H | 1.785514  | 1.528987  | 4.048269  |
| H | 1.666502  | -2.686646 | 4.791759  |



|   |           |           |           |
|---|-----------|-----------|-----------|
| C | 3.982745  | -3.381457 | 3.631312  |
| H | 4.727850  | -3.477958 | 4.426316  |
| H | 4.482625  | -3.588460 | 2.684800  |
| H | 3.215426  | -4.141761 | 3.785453  |
| C | 0.253197  | -0.403282 | 5.204808  |
| H | -0.272121 | 0.494575  | 4.872086  |
| H | 0.417504  | -0.320572 | 6.283961  |
| H | -0.393687 | -1.265879 | 5.028643  |
| C | 4.063578  | 1.648434  | 2.662265  |
| H | 3.554687  | 1.958503  | 1.740337  |
| H | 5.126335  | 1.517153  | 2.443684  |
| H | 3.972006  | 2.477481  | 3.367283  |
| H | 9.448079  | -0.571736 | 0.208590  |
| H | 4.678768  | -3.617292 | -3.426475 |
| H | 5.023725  | 2.161647  | -2.123027 |
| C | 2.789936  | 3.389828  | -1.108053 |
| C | 1.482594  | 3.230602  | -0.632451 |
| C | 0.540320  | 2.406233  | -1.264886 |
| C | 0.967345  | 1.698311  | -2.394141 |
| C | 2.275152  | 1.754629  | -2.876447 |
| C | 3.178277  | 2.608063  | -2.214417 |
| H | 1.176981  | 3.777902  | 0.250285  |
| H | 0.243588  | 1.095751  | -2.924530 |
| C | -0.856534 | 2.288959  | -0.775676 |
| C | -1.678580 | 1.227188  | -1.169281 |
| C | -1.413479 | 3.223952  | 0.105660  |
| C | -2.995177 | 1.081270  | -0.751183 |
| H | -1.260927 | 0.458161  | -1.808058 |
| C | -2.714259 | 3.128125  | 0.589779  |
| H | -0.812941 | 4.076057  | 0.401964  |
| C | -3.552899 | 2.049899  | 0.144883  |
| O | 4.472152  | 2.714352  | -2.695805 |
| O | -4.787562 | 2.005858  | 0.584217  |
| C | 2.702275  | 0.905848  | -4.085512 |
| C | 3.244136  | 1.794452  | -5.219190 |
| C | 3.767015  | -0.112673 | -3.642471 |
| C | 1.527680  | 0.102956  | -4.663016 |
| H | 2.473064  | 2.498662  | -5.547961 |
| H | 4.121370  | 2.358564  | -4.905701 |
| H | 3.516012  | 1.168808  | -6.076335 |
| H | 3.366995  | -0.743365 | -2.838800 |
| H | 4.037354  | -0.766181 | -4.479486 |
| H | 4.678501  | 0.369389  | -3.284720 |
| H | 1.884034  | -0.477466 | -5.519084 |

|   |           |           |           |
|---|-----------|-----------|-----------|
| H | 1.111591  | -0.600437 | -3.934573 |
| H | 0.722439  | 0.755185  | -5.014896 |
| C | 3.719242  | 4.468824  | -0.518180 |
| C | 5.105411  | 3.937498  | -0.105216 |
| C | 3.908258  | 5.559239  | -1.589974 |
| C | 3.101166  | 5.130079  | 0.722301  |
| H | 5.027089  | 3.038493  | 0.511907  |
| H | 5.731094  | 3.712209  | -0.968734 |
| H | 5.622880  | 4.702642  | 0.482617  |
| H | 2.945808  | 6.007252  | -1.855404 |
| H | 4.561550  | 6.350505  | -1.205731 |
| H | 4.360848  | 5.138691  | -2.490283 |
| H | 3.784779  | 5.898767  | 1.093646  |
| H | 2.148601  | 5.617410  | 0.495947  |
| H | 2.936710  | 4.409070  | 1.531218  |
| C | -3.261324 | 4.166089  | 1.582299  |
| C | -3.664282 | 3.467418  | 2.894519  |
| C | -2.218234 | 5.234034  | 1.938340  |
| C | -4.476146 | 4.900028  | 0.986670  |
| H | -4.406682 | 2.691253  | 2.707511  |
| H | -2.785029 | 3.012162  | 3.365927  |
| H | -4.079352 | 4.198866  | 3.598114  |
| H | -1.914684 | 5.816330  | 1.061922  |
| H | -2.650833 | 5.928704  | 2.665390  |
| H | -1.320649 | 4.795811  | 2.388237  |
| H | -4.842743 | 5.653117  | 1.694273  |
| H | -4.192995 | 5.414225  | 0.061803  |
| H | -5.278185 | 4.195956  | 0.767822  |
| C | -3.854401 | -0.077225 | -1.266417 |
| C | -4.360033 | -0.941034 | -0.093281 |
| C | -5.012619 | 0.501861  | -2.102024 |
| C | -3.083140 | -1.030260 | -2.189807 |
| H | -3.540554 | -1.567844 | 0.272774  |
| H | -4.713260 | -0.339005 | 0.746070  |
| H | -5.167780 | -1.601923 | -0.427967 |
| H | -4.618556 | 0.897277  | -3.044778 |
| H | -5.750447 | -0.274911 | -2.334645 |
| H | -5.510595 | 1.324322  | -1.588742 |
| H | -3.760069 | -1.826940 | -2.516355 |
| H | -2.708246 | -0.522223 | -3.084458 |
| H | -2.236306 | -1.496264 | -1.672827 |
| H | -5.919377 | 1.326934  | 0.425203  |
| C | -7.971761 | 2.842958  | -0.922966 |
| C | -7.872030 | 1.366217  | -0.628831 |

|    |            |           |           |
|----|------------|-----------|-----------|
| H  | -8.346495  | 3.000741  | -1.933794 |
| H  | -8.642520  | 3.318630  | -0.200804 |
| H  | -6.984538  | 3.301974  | -0.805037 |
| C  | -7.169740  | 1.026069  | 0.612028  |
| C  | -7.243041  | -0.345777 | 1.125699  |
| O  | -6.804706  | -0.421782 | 2.388380  |
| O  | -8.306091  | 0.548232  | -1.442788 |
| O  | -7.592193  | -1.353059 | 0.519242  |
| C  | -6.693621  | -1.742476 | 2.944034  |
| C  | -6.126588  | -1.591085 | 4.337947  |
| H  | -7.681899  | -2.211224 | 2.950966  |
| H  | -6.041731  | -2.338450 | 2.297742  |
| H  | -6.015926  | -2.573771 | 4.801638  |
| H  | -5.146272  | -1.109782 | 4.302149  |
| H  | -6.788525  | -0.984931 | 4.960314  |
| Li | -8.232192  | -1.354333 | -1.286219 |
| Cl | -7.274693  | -2.770231 | -2.770598 |
| H  | -7.322465  | 1.764272  | 1.401306  |
| O  | -10.045798 | -2.032874 | -0.998844 |
| C  | -10.784577 | -2.242573 | -2.217591 |
| C  | -9.960274  | -3.264909 | -0.256006 |
| C  | -10.912615 | -3.753520 | -2.363994 |
| H  | -11.764013 | -1.760517 | -2.116210 |
| H  | -10.232984 | -1.774951 | -3.037528 |
| C  | -10.976080 | -4.200117 | -0.901634 |
| H  | -8.941253  | -3.658798 | -0.353085 |
| H  | -10.162239 | -3.043270 | 0.794501  |
| H  | -10.011055 | -4.149666 | -2.839571 |
| H  | -11.787574 | -4.043132 | -2.948886 |
| H  | -10.719886 | -5.251203 | -0.756828 |
| H  | -11.975147 | -4.024080 | -0.489982 |

Vibrational frequencies

|            |          |          |
|------------|----------|----------|
| -1125.4762 | 10.7517  | 12.7292  |
| 16.7195    | 20.0651  | 23.8749  |
| 25.2338    | 27.7789  | 30.5827  |
| 33.8303    | 35.6664  | 39.3867  |
| 41.8067    | 45.6251  | 49.9424  |
| 50.2883    | 54.2680  | 55.1540  |
| 59.0301    | 61.8224  | 63.5445  |
| 68.4322    | 70.3921  | 73.7006  |
| 77.6076    | 77.7264  | 81.3810  |
| 83.3018    | 85.2454  | 90.2517  |
| 94.9494    | 97.5669  | 101.3901 |
| 102.4946   | 114.8757 | 118.8034 |

|          |          |          |
|----------|----------|----------|
| 120.5774 | 121.8881 | 123.7040 |
| 127.6928 | 131.4103 | 134.4675 |
| 135.8100 | 140.3093 | 140.9628 |
| 143.6642 | 149.3447 | 149.9043 |
| 154.6422 | 159.3307 | 161.7717 |
| 163.4963 | 164.8114 | 168.8249 |
| 176.1374 | 177.9290 | 184.9365 |
| 189.7707 | 197.2634 | 201.7564 |
| 202.8229 | 208.1264 | 213.6766 |
| 214.8704 | 220.1871 | 227.0184 |
| 231.2002 | 234.2908 | 236.3137 |
| 242.7763 | 249.7094 | 256.1272 |
| 261.7893 | 265.3835 | 266.2496 |
| 269.2441 | 271.6294 | 275.2669 |
| 276.4145 | 281.8303 | 288.0068 |
| 296.4497 | 299.1456 | 300.7965 |
| 304.9814 | 309.3169 | 309.7618 |
| 314.7058 | 325.2507 | 326.6812 |
| 328.7886 | 329.6154 | 330.8978 |
| 335.7097 | 338.1370 | 339.8083 |
| 350.3931 | 353.1879 | 354.4617 |
| 358.5708 | 359.2821 | 379.5287 |
| 382.0682 | 382.9847 | 384.0292 |
| 386.1826 | 386.9157 | 390.3829 |
| 396.7436 | 397.6282 | 400.2518 |
| 405.1233 | 408.1990 | 410.2591 |
| 413.1501 | 413.9148 | 420.7484 |
| 427.5772 | 434.4602 | 436.6336 |
| 440.7750 | 443.4036 | 447.6748 |
| 455.0044 | 458.5472 | 468.5021 |
| 469.9257 | 470.4630 | 474.8456 |
| 479.8644 | 482.7579 | 489.1035 |
| 494.6244 | 506.9789 | 527.9581 |
| 538.3868 | 541.5499 | 546.3966 |
| 549.6578 | 551.0535 | 557.6154 |
| 565.2211 | 569.3113 | 574.6589 |
| 582.8500 | 590.6154 | 591.5315 |
| 600.1329 | 600.4815 | 616.5787 |
| 624.8107 | 629.6415 | 629.8823 |
| 641.2732 | 645.7483 | 650.4646 |
| 652.3543 | 658.3349 | 662.7719 |
| 680.6763 | 682.2182 | 682.5578 |
| 694.4455 | 697.2938 | 703.3458 |
| 713.8645 | 724.8060 | 742.3066 |

|           |           |           |
|-----------|-----------|-----------|
| 747.2129  | 753.8240  | 762.1489  |
| 776.0895  | 781.2590  | 782.1010  |
| 784.2259  | 787.9930  | 797.8666  |
| 799.0819  | 801.0039  | 808.0298  |
| 816.1021  | 823.3629  | 839.6990  |
| 843.8879  | 850.3622  | 859.7414  |
| 868.7294  | 869.9006  | 871.9938  |
| 877.2037  | 886.1445  | 890.6251  |
| 891.7652  | 893.7658  | 900.2246  |
| 908.9121  | 913.9734  | 918.5802  |
| 921.0408  | 923.7795  | 928.5870  |
| 929.2571  | 932.4991  | 933.5297  |
| 934.8508  | 938.0785  | 948.4184  |
| 949.8992  | 951.0372  | 953.4289  |
| 953.8924  | 956.3772  | 956.5722  |
| 958.7129  | 959.2326  | 959.9972  |
| 961.0105  | 961.7687  | 962.1965  |
| 966.7794  | 967.1727  | 970.5473  |
| 975.3315  | 976.7795  | 978.4813  |
| 979.4065  | 984.6483  | 996.8606  |
| 999.9328  | 1010.9757 | 1018.7606 |
| 1022.4531 | 1030.2652 | 1041.0666 |
| 1041.7253 | 1043.6978 | 1044.9143 |
| 1046.7181 | 1048.1157 | 1050.9817 |
| 1051.7930 | 1054.3965 | 1054.7089 |
| 1055.5459 | 1056.4063 | 1057.8445 |
| 1058.0317 | 1058.7414 | 1059.4976 |
| 1063.4928 | 1068.3719 | 1070.5477 |
| 1070.8341 | 1072.9126 | 1077.2024 |
| 1084.6716 | 1108.7032 | 1123.3467 |
| 1125.8850 | 1128.2652 | 1143.5482 |
| 1147.7529 | 1150.3413 | 1155.3852 |
| 1160.3894 | 1175.3908 | 1179.4164 |
| 1180.8266 | 1184.4361 | 1187.1515 |
| 1194.3818 | 1194.6262 | 1207.7025 |
| 1210.3667 | 1210.5741 | 1213.1858 |
| 1215.0394 | 1228.6935 | 1229.9141 |
| 1233.1849 | 1237.0116 | 1244.1831 |
| 1245.2895 | 1246.7402 | 1249.8215 |
| 1250.5980 | 1252.2130 | 1253.0815 |
| 1254.5378 | 1256.3530 | 1263.8541 |
| 1269.1870 | 1281.4218 | 1282.6695 |
| 1284.5330 | 1287.7289 | 1288.1077 |
| 1290.8452 | 1296.7266 | 1301.7998 |

|           |           |           |
|-----------|-----------|-----------|
| 1306.5474 | 1312.4016 | 1313.9682 |
| 1316.2502 | 1321.2271 | 1326.6987 |
| 1327.3556 | 1327.5257 | 1328.7291 |
| 1333.3319 | 1335.4442 | 1342.7853 |
| 1345.8012 | 1353.4820 | 1355.8215 |
| 1358.3804 | 1365.4188 | 1366.3240 |
| 1372.0304 | 1379.4562 | 1380.1881 |
| 1383.0520 | 1384.5529 | 1386.3397 |
| 1392.5070 | 1392.6716 | 1394.8950 |
| 1397.3537 | 1399.9665 | 1402.0502 |
| 1405.3392 | 1405.5399 | 1406.8222 |
| 1411.4376 | 1411.4549 | 1419.1939 |
| 1422.3284 | 1422.7824 | 1424.4363 |
| 1428.7531 | 1430.7411 | 1431.4553 |
| 1433.6617 | 1441.3740 | 1451.5192 |
| 1457.9384 | 1465.1572 | 1466.2445 |
| 1470.3856 | 1471.7716 | 1472.9751 |
| 1478.6161 | 1481.3123 | 1485.3002 |
| 1485.5286 | 1486.4338 | 1490.0037 |
| 1490.2062 | 1492.5046 | 1495.4539 |
| 1495.6955 | 1496.3422 | 1496.6972 |
| 1497.7565 | 1498.4885 | 1500.3219 |
| 1500.8975 | 1502.5333 | 1503.4006 |
| 1503.5560 | 1504.6286 | 1504.9254 |
| 1505.5820 | 1506.7408 | 1509.2293 |
| 1511.3939 | 1512.6879 | 1512.9643 |
| 1514.0408 | 1517.5004 | 1517.6353 |
| 1519.2036 | 1519.8447 | 1521.2952 |
| 1521.6139 | 1525.7533 | 1526.3248 |
| 1531.6763 | 1532.3234 | 1533.9709 |
| 1534.4036 | 1534.7120 | 1536.8363 |
| 1536.9874 | 1540.0889 | 1540.5703 |
| 1542.2409 | 1553.1198 | 1563.8024 |
| 1567.2032 | 1621.6425 | 1637.8822 |
| 1650.0890 | 1664.4848 | 1668.1562 |
| 1677.0759 | 1684.1182 | 1686.5053 |
| 1688.5358 | 1690.4275 | 1692.3314 |
| 1707.5938 | 1733.5067 | 1787.3151 |
| 1814.8800 | 2404.9386 | 3044.8200 |
| 3046.7971 | 3050.6876 | 3052.1225 |
| 3055.2702 | 3056.0695 | 3056.2439 |
| 3058.6158 | 3060.1784 | 3065.7606 |
| 3066.6395 | 3068.2801 | 3069.0920 |
| 3069.6513 | 3073.1571 | 3073.6046 |

|           |           |           |
|-----------|-----------|-----------|
| 3075.6890 | 3077.8580 | 3084.2317 |
| 3089.3330 | 3089.6184 | 3091.5278 |
| 3093.5070 | 3102.5536 | 3110.4830 |
| 3114.7143 | 3119.9374 | 3122.6504 |
| 3124.1867 | 3131.5595 | 3131.6923 |
| 3132.5642 | 3133.1816 | 3133.5551 |
| 3136.2760 | 3137.8746 | 3139.7394 |
| 3140.2804 | 3140.8298 | 3142.3317 |
| 3144.3385 | 3144.4781 | 3144.4853 |
| 3145.2257 | 3146.8757 | 3149.5279 |
| 3151.8339 | 3155.2267 | 3155.6199 |
| 3155.8635 | 3164.0520 | 3164.7347 |
| 3164.8071 | 3165.4493 | 3168.4044 |
| 3169.6623 | 3170.3097 | 3172.3428 |
| 3176.9304 | 3177.9236 | 3179.8771 |
| 3182.1261 | 3182.8480 | 3184.6787 |
| 3191.2705 | 3193.6777 | 3195.6855 |
| 3198.4950 | 3204.4310 | 3206.3210 |
| 3206.7020 | 3206.9567 | 3210.5835 |
| 3211.8573 | 3217.1034 | 3217.4506 |
| 3223.0721 | 3224.3568 | 3225.5469 |
| 3230.7495 | 3235.2483 | 3238.1874 |
| 3256.7317 | 3262.4197 | 3840.9771 |

#### TS4'

Zero-point correction= 1.310835

Thermal correction to Energy= 1.386373

Thermal correction to Enthalpy= 1.387317

Thermal correction to Gibbs Free Energy= 1.199910

Sum of electronic and zero-point Energies= -3266.839306

Sum of electronic and thermal Energies= -3266.763768

Sum of electronic and thermal Enthalpies= -3266.762824

Sum of electronic and thermal Free Energies= -3266.950231

Cartesian coordinates

|   |           |           |           |
|---|-----------|-----------|-----------|
| C | -3.603182 | 0.075203  | 0.589954  |
| C | -2.163027 | 0.176204  | 0.370463  |
| C | -1.564771 | 0.862124  | -0.636719 |
| O | -4.142874 | -0.885738 | 1.109686  |
| C | -0.157679 | 1.258068  | -0.683973 |
| C | 0.388458  | 1.788717  | -1.863668 |
| C | 0.618970  | 1.238194  | 0.486504  |
| C | 1.687295  | 2.274675  | -1.871824 |
| H | -0.207072 | 1.822689  | -2.771578 |
| C | 1.916103  | 1.726818  | 0.471896  |

|   |           |           |           |
|---|-----------|-----------|-----------|
| H | 0.202713  | 0.852346  | 1.412774  |
| C | 2.457429  | 2.234430  | -0.707402 |
| H | 2.103190  | 2.677550  | -2.789199 |
| H | 2.518982  | 1.682129  | 1.372339  |
| H | 3.481540  | 2.595261  | -0.718298 |
| C | -2.389963 | 1.225731  | -1.768336 |
| N | -3.062389 | 1.431348  | -2.688605 |
| H | -1.560869 | -0.336937 | 1.118472  |
| C | -4.518542 | 1.270789  | 0.351990  |
| C | -6.355267 | 2.437096  | 0.238996  |
| C | -6.723385 | -0.028311 | 0.137217  |
| H | -6.423897 | -0.709466 | 0.935195  |
| N | -5.395948 | 3.314099  | 0.361943  |
| N | -4.261639 | 2.582851  | 0.430374  |
| N | -5.859630 | 1.167235  | 0.243655  |
| C | -7.829715 | 2.690461  | 0.149489  |
| H | -8.014837 | 3.553787  | -0.490560 |
| H | -8.215977 | 2.903933  | 1.155937  |
| C | -8.210541 | 0.375547  | 0.297253  |
| O | -8.461362 | 1.573145  | -0.421415 |
| C | -7.987552 | -1.133374 | -1.527911 |
| C | -6.699066 | -0.693595 | -1.220527 |
| C | -5.636654 | -0.902835 | -2.084772 |
| C | -5.876555 | -1.580428 | -3.280732 |
| C | -7.157734 | -2.037565 | -3.586949 |
| C | -8.224022 | -1.815413 | -2.713519 |
| C | -8.955594 | -0.744411 | -0.434972 |
| H | -4.639238 | -0.534927 | -1.864521 |
| H | -7.330413 | -2.560170 | -4.521964 |
| H | -9.223266 | -2.156970 | -2.964993 |
| H | -9.143636 | -1.579930 | 0.247568  |
| H | -9.916781 | -0.380986 | -0.804540 |
| C | -3.000746 | 3.279264  | 0.568083  |
| C | -2.248120 | 3.105014  | 1.731376  |
| C | -2.606587 | 4.115235  | -0.487841 |
| C | -1.007439 | 3.741615  | 1.784169  |
| C | -1.351690 | 4.709743  | -0.381598 |
| C | -0.530645 | 4.520078  | 0.731995  |
| H | -0.392053 | 3.604172  | 2.670171  |
| H | -1.005194 | 5.337885  | -1.198505 |
| C | -3.484961 | 4.415592  | -1.674458 |
| H | -4.144494 | 5.257472  | -1.443395 |
| H | -4.112319 | 3.572091  | -1.963918 |
| H | -2.868372 | 4.689018  | -2.532280 |



|   |           |           |           |
|---|-----------|-----------|-----------|
| C | 0.831138  | 5.157311  | 0.789937  |
| H | 1.373733  | 4.982415  | -0.142940 |
| H | 1.423310  | 4.749714  | 1.611423  |
| H | 0.746388  | 6.239395  | 0.930067  |
| C | -2.688569 | 2.255846  | 2.894519  |
| H | -2.134751 | 1.310212  | 2.909171  |
| H | -3.757660 | 2.030995  | 2.887843  |
| H | -2.464925 | 2.768726  | 3.832232  |
| H | -8.498266 | 0.494772  | 1.348789  |
| H | -5.059592 | -1.746362 | -3.975078 |
| H | -3.645858 | -2.745024 | 1.630244  |
| C | -1.020932 | -2.429552 | 2.461790  |
| C | 0.241887  | -1.936638 | 2.118612  |
| C | 0.794740  | -2.092989 | 0.840047  |
| C | 0.031139  | -2.780252 | -0.108213 |
| C | -1.253280 | -3.257374 | 0.154071  |
| C | -1.776116 | -3.049937 | 1.445283  |
| H | 0.819297  | -1.404726 | 2.864074  |
| H | 0.470262  | -2.964179 | -1.079178 |
| C | 2.140142  | -1.568494 | 0.500835  |
| C | 2.509993  | -1.323512 | -0.826936 |
| C | 3.084485  | -1.284033 | 1.493489  |
| C | 3.762023  | -0.836104 | -1.189133 |
| H | 1.771479  | -1.488822 | -1.602481 |
| C | 4.336235  | -0.749256 | 1.208478  |
| H | 2.832215  | -1.509077 | 2.523391  |
| C | 4.698489  | -0.519595 | -0.156262 |
| O | -3.052462 | -3.504363 | 1.735196  |
| O | 5.865345  | 0.029130  | -0.427786 |
| C | -2.059940 | -3.972766 | -0.941865 |
| C | -2.490367 | -5.376555 | -0.480745 |
| C | -3.287989 | -3.122795 | -1.306694 |
| C | -1.240554 | -4.153050 | -2.228324 |
| H | -1.609345 | -5.982181 | -0.245249 |
| H | -3.129278 | -5.333502 | 0.399810  |
| H | -3.036708 | -5.875443 | -1.288532 |
| H | -2.963751 | -2.132580 | -1.650601 |
| H | -3.848735 | -3.593343 | -2.121937 |
| H | -3.969657 | -2.991524 | -0.463809 |
| H | -1.853993 | -4.676124 | -2.967856 |
| H | -0.940109 | -3.194419 | -2.663482 |
| H | -0.341514 | -4.752615 | -2.055081 |
| C | -1.536830 | -2.340902 | 3.909772  |
| C | -2.887497 | -1.608193 | 4.012734  |

|   |           |           |           |
|---|-----------|-----------|-----------|
| C | -1.691204 | -3.768423 | 4.465025  |
| C | -0.550806 | -1.587855 | 4.813636  |
| H | -2.856787 | -0.644836 | 3.493185  |
| H | -3.709377 | -2.195599 | 3.604067  |
| H | -3.114411 | -1.409949 | 5.065393  |
| H | -0.726138 | -4.284419 | 4.464388  |
| H | -2.057336 | -3.728502 | 5.496895  |
| H | -2.397675 | -4.344202 | 3.864831  |
| H | -0.945256 | -1.568142 | 5.833506  |
| H | 0.429028  | -2.073215 | 4.845195  |
| H | -0.412835 | -0.550576 | 4.487763  |
| C | 5.333513  | -0.432531 | 2.333443  |
| C | 5.716945  | 1.058832  | 2.308290  |
| C | 4.749592  | -0.729762 | 3.721194  |
| C | 6.600140  | -1.291292 | 2.174337  |
| H | 6.160305  | 1.325782  | 1.348699  |
| H | 4.833205  | 1.685412  | 2.480690  |
| H | 6.436776  | 1.271040  | 3.109132  |
| H | 4.512934  | -1.791504 | 3.847369  |
| H | 5.487149  | -0.461391 | 4.484456  |
| H | 3.841018  | -0.148873 | 3.915868  |
| H | 7.283724  | -1.106955 | 3.012299  |
| H | 6.340811  | -2.355709 | 2.176645  |
| H | 7.122968  | -1.048941 | 1.249415  |
| C | 4.162149  | -0.725049 | -2.669689 |
| C | 4.780638  | 0.636291  | -3.038190 |
| C | 5.180497  | -1.842683 | -2.957696 |
| C | 2.964039  | -0.936018 | -3.607078 |
| H | 4.082410  | 1.445447  | -2.805221 |
| H | 5.718220  | 0.823599  | -2.519789 |
| H | 4.974853  | 0.659147  | -4.116633 |
| H | 4.706998  | -2.825867 | -2.861493 |
| H | 5.584970  | -1.746762 | -3.972485 |
| H | 6.012554  | -1.797641 | -2.253413 |
| H | 3.300890  | -0.844187 | -4.644568 |
| H | 2.517444  | -1.929062 | -3.493380 |
| H | 2.185594  | -0.184053 | -3.434955 |
| H | 6.903079  | -0.424265 | -0.937925 |
| C | 8.617043  | -2.054892 | -3.253835 |
| C | 8.299420  | -0.651979 | -2.753580 |
| H | 8.337528  | -2.145756 | -4.304328 |
| H | 9.694411  | -2.228291 | -3.155734 |
| H | 8.107728  | -2.819897 | -2.662054 |
| C | 8.225842  | -0.509978 | -1.294699 |

|   |           |           |           |
|---|-----------|-----------|-----------|
| C | 8.587618  | 0.777562  | -0.692049 |
| O | 9.020817  | 0.605109  | 0.589168  |
| O | 8.117200  | 0.251484  | -3.560429 |
| O | 8.483024  | 1.887862  | -1.174947 |
| C | 9.267177  | 1.805940  | 1.321222  |
| C | 9.680344  | 1.404527  | 2.720995  |
| H | 10.050607 | 2.383577  | 0.819579  |
| H | 8.359832  | 2.418478  | 1.327741  |
| H | 9.885905  | 2.293794  | 3.322022  |
| H | 8.883679  | 0.833197  | 3.204514  |
| H | 10.581692 | 0.787174  | 2.695295  |
| H | 8.636879  | -1.356193 | -0.745259 |

Vibrational frequencies

|            |          |          |
|------------|----------|----------|
| -1230.8101 | 5.5082   | 14.0542  |
| 16.0951    | 20.9162  | 25.8314  |
| 28.6122    | 33.1281  | 38.6221  |
| 40.5938    | 42.5669  | 46.2829  |
| 49.2950    | 54.7364  | 61.7362  |
| 63.1400    | 66.2716  | 71.3142  |
| 77.1463    | 79.4614  | 82.8688  |
| 83.9805    | 84.6138  | 89.0918  |
| 93.6615    | 100.6220 | 103.0336 |
| 105.2103   | 107.1522 | 112.1362 |
| 116.3528   | 119.7403 | 121.4330 |
| 128.0462   | 131.7765 | 138.6728 |
| 139.7868   | 140.8306 | 145.8710 |
| 151.4828   | 153.4355 | 156.3481 |
| 159.9017   | 166.8950 | 168.2763 |
| 172.4378   | 176.5410 | 179.1435 |
| 183.7610   | 200.5249 | 204.6551 |
| 208.4683   | 210.7487 | 213.4987 |
| 221.8670   | 222.3328 | 227.7408 |
| 232.7709   | 236.5833 | 241.7293 |
| 242.9984   | 251.9922 | 253.4488 |
| 262.9450   | 264.8096 | 265.6727 |
| 268.0215   | 271.6966 | 281.2650 |
| 287.5185   | 288.3102 | 288.9713 |
| 296.5828   | 304.2901 | 305.4977 |
| 310.4581   | 320.7592 | 322.7894 |
| 326.6081   | 327.2146 | 328.7126 |
| 329.2125   | 333.3312 | 341.7343 |
| 342.7563   | 345.0021 | 345.9744 |
| 352.5281   | 355.4099 | 359.7156 |
| 361.4267   | 363.4411 | 365.2396 |

|           |           |           |
|-----------|-----------|-----------|
| 366.2072  | 379.0111  | 386.4641  |
| 389.3882  | 394.6285  | 398.9067  |
| 401.7669  | 405.0518  | 408.4803  |
| 409.3840  | 410.1193  | 420.6092  |
| 423.5647  | 426.6598  | 433.2277  |
| 434.7370  | 443.3440  | 445.7885  |
| 456.4502  | 466.3637  | 467.6415  |
| 477.8815  | 480.4055  | 486.3081  |
| 497.5885  | 498.0895  | 505.9637  |
| 512.5207  | 525.8074  | 532.9256  |
| 543.0547  | 543.3676  | 552.1523  |
| 557.2066  | 557.7430  | 572.3256  |
| 578.4082  | 581.6806  | 588.7115  |
| 592.1104  | 596.0521  | 597.3450  |
| 623.9104  | 627.9564  | 633.5109  |
| 640.4216  | 643.9266  | 646.6586  |
| 651.5936  | 659.1300  | 660.8332  |
| 673.2519  | 683.2713  | 692.1268  |
| 699.0038  | 703.2400  | 714.3292  |
| 716.5509  | 726.0578  | 751.4661  |
| 751.9538  | 763.9570  | 777.7584  |
| 778.3824  | 779.5481  | 783.3409  |
| 785.2953  | 790.2697  | 790.3991  |
| 806.4894  | 810.4537  | 817.3162  |
| 825.9630  | 837.8090  | 842.0092  |
| 844.9796  | 864.7329  | 870.3508  |
| 871.7992  | 876.9751  | 883.7547  |
| 886.1065  | 890.2310  | 896.7135  |
| 898.0091  | 910.4334  | 916.6948  |
| 921.4603  | 925.6596  | 926.4229  |
| 927.0057  | 934.4590  | 941.8959  |
| 945.8549  | 946.9077  | 947.4847  |
| 948.8196  | 953.8522  | 954.1940  |
| 954.7048  | 955.5565  | 956.8770  |
| 957.5792  | 958.8130  | 962.4108  |
| 963.0261  | 963.8858  | 966.3498  |
| 967.5269  | 974.7090  | 977.7767  |
| 980.6885  | 985.5436  | 997.3672  |
| 1008.6611 | 1019.1424 | 1021.8764 |
| 1023.9901 | 1031.9999 | 1036.5590 |
| 1039.1619 | 1042.5470 | 1042.7372 |
| 1043.8057 | 1047.0665 | 1048.2903 |
| 1049.4997 | 1050.8584 | 1053.3990 |
| 1055.3884 | 1055.9613 | 1056.0500 |

|           |           |           |
|-----------|-----------|-----------|
| 1057.4098 | 1057.8824 | 1060.8087 |
| 1064.7966 | 1067.7351 | 1068.0472 |
| 1073.0809 | 1084.0287 | 1119.1008 |
| 1122.5571 | 1137.0691 | 1143.2263 |
| 1146.9061 | 1150.0691 | 1155.3496 |
| 1157.6999 | 1175.5424 | 1177.0059 |
| 1183.6615 | 1188.9230 | 1189.9829 |
| 1191.2331 | 1203.6745 | 1209.3914 |
| 1226.4743 | 1227.3496 | 1228.7799 |
| 1232.9672 | 1238.8495 | 1244.2742 |
| 1245.0612 | 1246.2046 | 1246.5490 |
| 1249.8292 | 1250.0461 | 1250.5881 |
| 1252.9098 | 1253.7700 | 1263.3460 |
| 1265.5770 | 1266.6617 | 1283.6630 |
| 1284.5845 | 1286.5545 | 1287.1365 |
| 1295.2272 | 1301.3625 | 1307.3943 |
| 1309.2564 | 1310.4534 | 1313.8664 |
| 1317.1446 | 1321.2774 | 1327.1431 |
| 1330.6595 | 1334.4900 | 1338.3278 |
| 1339.6627 | 1343.0278 | 1358.2675 |
| 1361.3920 | 1365.0078 | 1370.5301 |
| 1378.6986 | 1380.6082 | 1381.6376 |
| 1385.0910 | 1385.6509 | 1388.4037 |
| 1389.5525 | 1393.3775 | 1397.9186 |
| 1399.3824 | 1400.9086 | 1402.0242 |
| 1403.2930 | 1410.2756 | 1412.2042 |
| 1418.8201 | 1420.6880 | 1421.8228 |
| 1428.7484 | 1429.1077 | 1429.4869 |
| 1430.8799 | 1433.0779 | 1449.1413 |
| 1452.0453 | 1453.0418 | 1464.7539 |
| 1473.7862 | 1474.3872 | 1475.0918 |
| 1479.7157 | 1481.0301 | 1481.5059 |
| 1485.2712 | 1486.7157 | 1488.0794 |
| 1491.5707 | 1492.1223 | 1492.9649 |
| 1493.3953 | 1494.2060 | 1495.1018 |
| 1495.8095 | 1496.2018 | 1498.1909 |
| 1499.9263 | 1500.5446 | 1501.3331 |
| 1501.6494 | 1503.5346 | 1505.3358 |
| 1505.4457 | 1506.9086 | 1507.6418 |
| 1509.1247 | 1510.4687 | 1511.5606 |
| 1514.2307 | 1515.4614 | 1516.9265 |
| 1517.6744 | 1518.5884 | 1520.7329 |
| 1522.2697 | 1527.0506 | 1530.9112 |
| 1531.4078 | 1533.1473 | 1536.2793 |

|           |           |           |
|-----------|-----------|-----------|
| 1536.8975 | 1537.1366 | 1538.1091 |
| 1547.8841 | 1557.2740 | 1557.4563 |
| 1619.2960 | 1637.3558 | 1650.6160 |
| 1660.1327 | 1667.3129 | 1677.0122 |
| 1684.3514 | 1685.4968 | 1687.5041 |
| 1688.7439 | 1691.4681 | 1708.6504 |
| 1773.1854 | 1781.1034 | 1851.9211 |
| 2404.5564 | 3040.3375 | 3044.8616 |
| 3048.9766 | 3050.3408 | 3051.8943 |
| 3052.3898 | 3054.9620 | 3055.9036 |
| 3058.5342 | 3064.5873 | 3065.2971 |
| 3069.2903 | 3071.0949 | 3072.3548 |
| 3073.3648 | 3073.8801 | 3078.9087 |
| 3086.5020 | 3086.5487 | 3091.0657 |
| 3102.6707 | 3106.6192 | 3120.5269 |
| 3123.9199 | 3124.0779 | 3126.0032 |
| 3128.6860 | 3128.9452 | 3129.5748 |
| 3131.4108 | 3131.6552 | 3136.2330 |
| 3137.4012 | 3137.5715 | 3138.2460 |
| 3141.0373 | 3142.3572 | 3142.6058 |
| 3142.6982 | 3145.7089 | 3146.7814 |
| 3156.4863 | 3162.2244 | 3162.3336 |
| 3163.6374 | 3164.1605 | 3166.9057 |
| 3167.5116 | 3168.0327 | 3168.4554 |
| 3177.3513 | 3177.9199 | 3180.8050 |
| 3181.3952 | 3181.4731 | 3185.2674 |
| 3189.9919 | 3192.5684 | 3192.8250 |
| 3194.2758 | 3198.7293 | 3207.0421 |
| 3207.3814 | 3207.9017 | 3214.3728 |
| 3217.1459 | 3222.0238 | 3223.0022 |
| 3226.8352 | 3230.7802 | 3233.9257 |
| 3238.3861 | 3245.0772 | 3245.9273 |
| 3248.7237 | 3270.4638 | 3790.9431 |

## DQH<sub>2</sub>

Zero-point correction= 0.646981

Thermal correction to Energy= 0.679993

Thermal correction to Enthalpy= 0.680937

Thermal correction to Gibbs Free Energy= 0.585465

Sum of electronic and zero-point Energies= -1241.597174

Sum of electronic and thermal Energies= -1241.564162

Sum of electronic and thermal Enthalpies= -1241.563218

Sum of electronic and thermal Free Energies= -1241.658691

Cartesian coordinates

|   |           |           |           |
|---|-----------|-----------|-----------|
| H | -5.281344 | -0.771836 | -0.225091 |
| C | -2.857439 | -1.169112 | -0.375144 |
| C | -1.461742 | -1.134339 | -0.370267 |
| C | -0.742148 | 0.000341  | 0.001355  |
| C | -1.457959 | 1.139877  | 0.374243  |
| C | -2.850704 | 1.181615  | 0.385419  |
| C | -3.535791 | 0.006855  | 0.008975  |
| H | -0.905071 | -2.008182 | -0.686431 |
| H | -0.896610 | 2.012756  | 0.684953  |
| C | 0.742148  | 0.000334  | -0.001485 |
| C | 1.457988  | 1.139864  | -0.374345 |
| C | 1.461716  | -1.134362 | 0.370146  |
| C | 2.850734  | 1.181573  | -0.385460 |
| H | 0.896670  | 2.012752  | -0.685090 |
| C | 2.857410  | -1.169140 | 0.375117  |
| H | 0.905021  | -2.008213 | 0.686250  |
| C | 3.535797  | 0.006817  | -0.008960 |
| O | -4.903176 | 0.072188  | 0.036095  |
| O | 4.903185  | 0.072145  | -0.036004 |
| C | -3.603879 | 2.455958  | 0.800666  |
| C | -4.481398 | 2.960278  | -0.360190 |
| C | -4.470074 | 2.188609  | 2.045189  |
| C | -2.634258 | 3.590835  | 1.160086  |
| H | -3.861859 | 3.183887  | -1.234778 |
| H | -5.235802 | 2.227473  | -0.645846 |
| H | -4.989529 | 3.883553  | -0.060975 |
| H | -3.844707 | 1.851147  | 2.878117  |
| H | -4.967909 | 3.115546  | 2.350375  |
| H | -5.232709 | 1.434074  | 1.854452  |
| H | -3.213333 | 4.476021  | 1.439141  |
| H | -1.996184 | 3.328676  | 2.009839  |
| H | -1.993919 | 3.863430  | 0.315075  |
| C | -3.612607 | -2.442826 | -0.798006 |
| C | -4.462245 | -2.986565 | 0.371508  |
| C | -4.472790 | -2.178602 | -2.052833 |
| C | -2.646309 | -3.574367 | -1.179161 |
| H | -3.807848 | -3.266974 | 1.201810  |
| H | -5.194361 | -2.282266 | 0.775875  |
| H | -5.008472 | -3.878584 | 0.049455  |
| H | -3.826798 | -1.890773 | -2.887128 |
| H | -5.007925 | -3.091214 | -2.332929 |
| H | -5.215654 | -1.384239 | -1.942866 |
| H | -3.226781 | -4.456042 | -1.465788 |
| H | -2.015162 | -3.298126 | -2.028646 |

|   |           |           |           |
|---|-----------|-----------|-----------|
| H | -2.001911 | -3.855131 | -0.340954 |
| C | 3.612539  | -2.442857 | 0.798031  |
| C | 4.472589  | -2.178587 | 2.052930  |
| C | 2.646187  | -3.574392 | 1.179065  |
| C | 4.462319  | -2.986621 | -0.371374 |
| H | 5.215475  | -1.384242 | 1.942951  |
| H | 3.826524  | -1.890694 | 2.887148  |
| H | 5.007697  | -3.091184 | 2.333135  |
| H | 2.001884  | -3.855118 | 0.340772  |
| H | 3.226617  | -4.456077 | 1.465745  |
| H | 2.014940  | -3.298165 | 2.028481  |
| H | 5.008490  | -3.878633 | -0.049223 |
| H | 3.808019  | -3.267040 | -1.201752 |
| H | 5.194499  | -2.282341 | -0.775661 |
| C | 3.603954  | 2.455899  | -0.800666 |
| C | 4.481426  | 2.960160  | 0.360247  |
| C | 4.470181  | 2.188580  | -2.045172 |
| C | 2.634362  | 3.590804  | -1.160092 |
| H | 3.861836  | 3.183812  | 1.234788  |
| H | 5.235766  | 2.227311  | 0.645964  |
| H | 4.989641  | 3.883402  | 0.061071  |
| H | 3.844832  | 1.851125  | -2.878120 |
| H | 4.968004  | 3.115530  | -2.350333 |
| H | 5.232818  | 1.434044  | -1.854447 |
| H | 3.213461  | 4.475993  | -1.439085 |
| H | 1.996323  | 3.328679  | -2.009883 |
| H | 1.993984  | 3.863378  | -0.315103 |
| H | 5.281276  | -0.771946 | 0.225079  |

Vibrational frequencies

|          |          |          |
|----------|----------|----------|
| 16.9163  | 29.5876  | 38.5974  |
| 46.0050  | 52.4790  | 71.3535  |
| 71.9997  | 83.5034  | 107.2819 |
| 125.7435 | 148.7919 | 161.1577 |
| 162.0057 | 170.4790 | 173.3716 |
| 177.5548 | 185.8048 | 196.4260 |
| 206.0054 | 211.8600 | 222.8387 |
| 228.2938 | 242.4463 | 244.1465 |
| 273.2945 | 275.8510 | 277.4404 |
| 286.1329 | 303.1615 | 312.3747 |
| 314.0049 | 326.4670 | 328.3796 |
| 334.6060 | 354.7135 | 357.2040 |
| 371.8227 | 380.2618 | 382.5420 |
| 382.6269 | 392.1901 | 393.2872 |
| 403.2591 | 404.2211 | 408.5152 |



|           |           |           |
|-----------|-----------|-----------|
| 409.4411  | 416.0255  | 447.1822  |
| 448.8217  | 449.2936  | 452.8312  |
| 458.9840  | 477.0470  | 479.9790  |
| 531.7227  | 533.5850  | 545.2492  |
| 555.3523  | 593.8378  | 628.4049  |
| 639.0531  | 641.7664  | 642.1024  |
| 673.4905  | 684.6513  | 771.8649  |
| 775.8646  | 777.4791  | 788.5008  |
| 789.5848  | 832.7361  | 838.5144  |
| 866.1387  | 911.4081  | 918.0662  |
| 924.1255  | 939.0269  | 942.9955  |
| 947.0472  | 948.1655  | 949.9856  |
| 953.7437  | 954.3845  | 954.7823  |
| 955.7735  | 961.9632  | 962.1529  |
| 964.6367  | 964.6392  | 978.3605  |
| 978.3996  | 980.5681  | 1047.7246 |
| 1049.8360 | 1052.6655 | 1053.0799 |
| 1057.4551 | 1057.5497 | 1059.2022 |
| 1059.2744 | 1153.0143 | 1159.1797 |
| 1160.4181 | 1186.7573 | 1188.9429 |
| 1233.1372 | 1234.0354 | 1242.2081 |
| 1242.2911 | 1248.3508 | 1248.5751 |
| 1249.1163 | 1251.5396 | 1285.9221 |
| 1291.3366 | 1294.1198 | 1300.0031 |
| 1311.0990 | 1315.3463 | 1321.5005 |
| 1328.0334 | 1359.1887 | 1364.0726 |
| 1391.5320 | 1397.7382 | 1397.7666 |
| 1405.4293 | 1405.6129 | 1414.5972 |
| 1414.8568 | 1421.3224 | 1421.3352 |
| 1431.8002 | 1431.9962 | 1447.4724 |
| 1447.5299 | 1461.6191 | 1484.4547 |
| 1486.5735 | 1486.6532 | 1487.7765 |
| 1487.7814 | 1492.9017 | 1495.4102 |
| 1499.3552 | 1502.3631 | 1502.9998 |
| 1503.1685 | 1505.4220 | 1507.0274 |
| 1507.1191 | 1509.6354 | 1511.8506 |
| 1515.2815 | 1519.7028 | 1519.7191 |
| 1519.7809 | 1519.8094 | 1530.2106 |
| 1533.6578 | 1535.7574 | 1537.4523 |
| 1537.7840 | 1546.7180 | 1665.5105 |
| 1679.1604 | 1691.7466 | 1694.8875 |
| 3057.9734 | 3057.9819 | 3059.9494 |
| 3059.9941 | 3065.4248 | 3065.5965 |
| 3066.8798 | 3066.9195 | 3068.2607 |

|           |           |           |
|-----------|-----------|-----------|
| 3068.3620 | 3072.9059 | 3072.9679 |
| 3129.0384 | 3129.0463 | 3131.4483 |
| 3131.4536 | 3142.8228 | 3143.2463 |
| 3144.8833 | 3144.9000 | 3146.1142 |
| 3146.1538 | 3149.5713 | 3149.6421 |
| 3150.4780 | 3150.5029 | 3151.6569 |
| 3151.8116 | 3152.6462 | 3152.8019 |
| 3156.0953 | 3156.1639 | 3183.9553 |
| 3183.9703 | 3185.3148 | 3185.3233 |
| 3244.7136 | 3247.0245 | 3250.6118 |
| 3253.4213 | 3936.7070 | 3937.1739 |

#### M4

Zero-point correction= 0.793931

Thermal correction to Energy= 0.844729

Thermal correction to Enthalpy= 0.845673

Thermal correction to Gibbs Free Energy= 0.708805

Sum of electronic and zero-point Energies= -2725.353471

Sum of electronic and thermal Energies= -2725.302674

Sum of electronic and thermal Enthalpies= -2725.301729

Sum of electronic and thermal Free Energies= -2725.438598

Cartesian coordinates

|   |           |           |           |
|---|-----------|-----------|-----------|
| C | 0.803170  | -0.526444 | 1.275248  |
| C | -0.582984 | -0.194571 | 0.940359  |
| C | -1.210061 | -0.493914 | -0.222640 |
| O | 1.426801  | -0.049200 | 2.200056  |
| C | -2.667050 | -0.599681 | -0.398230 |
| C | -3.206980 | -0.836151 | -1.669884 |
| C | -3.517198 | -0.576160 | 0.714987  |
| C | -4.570489 | -1.041429 | -1.824453 |
| H | -2.555528 | -0.844272 | -2.538626 |
| C | -4.883067 | -0.771497 | 0.555290  |
| H | -3.115481 | -0.434153 | 1.712836  |
| C | -5.411728 | -1.006445 | -0.713143 |
| H | -4.979533 | -1.221431 | -2.812616 |
| H | -5.533896 | -0.750544 | 1.423410  |
| H | -6.478538 | -1.166829 | -0.834517 |
| C | -0.390449 | -0.790798 | -1.375623 |
| N | 0.294740  | -0.998705 | -2.285904 |
| H | -1.143770 | 0.229965  | 1.766196  |
| C | 1.482126  | -1.712664 | 0.598708  |
| C | 3.053169  | -3.060424 | -0.062549 |
| C | 3.846788  | -0.762310 | 0.563924  |
| H | 3.710770  | -0.385655 | 1.581425  |

|   |           |           |           |
|---|-----------|-----------|-----------|
| N | 1.964025  | -3.779080 | -0.063605 |
| N | 0.992338  | -2.931209 | 0.353459  |
| N | 2.800610  | -1.785781 | 0.359524  |
| C | 4.448450  | -3.481596 | -0.409761 |
| H | 4.434171  | -4.103004 | -1.305625 |
| H | 4.865309  | -4.065517 | 0.422759  |
| C | 5.241983  | -1.421927 | 0.405852  |
| O | 5.220192  | -2.338690 | -0.678300 |
| C | 5.198511  | 0.653524  | -0.761889 |
| C | 3.868644  | 0.357160  | -0.453957 |
| C | 2.820287  | 1.090564  | -0.994415 |
| C | 3.124919  | 2.131962  | -1.872727 |
| C | 4.451216  | 2.426905  | -2.189012 |
| C | 5.499024  | 1.691815  | -1.633677 |
| C | 6.141933  | -0.258745 | -0.013707 |
| H | 1.771379  | 0.907748  | -0.769187 |
| H | 4.670742  | 3.239586  | -2.874144 |
| H | 6.530767  | 1.923714  | -1.880317 |
| H | 6.551056  | 0.238499  | 0.872335  |
| H | 6.977620  | -0.624817 | -0.614426 |
| C | -0.369816 | -3.386106 | 0.496386  |
| C | -0.973932 | -3.300622 | 1.756135  |
| C | -1.039474 | -3.849362 | -0.645281 |
| C | -2.332396 | -3.606191 | 1.831506  |
| C | -2.397029 | -4.133992 | -0.505329 |
| C | -3.065077 | -3.997390 | 0.711321  |
| H | -2.828163 | -3.530545 | 2.796333  |
| H | -2.949084 | -4.463503 | -1.382060 |
| C | -0.361876 | -4.090851 | -1.969194 |
| H | 0.008348  | -5.119949 | -2.008448 |
| H | 0.482956  | -3.427087 | -2.145049 |
| H | -1.078531 | -3.955419 | -2.781670 |
| C | -4.535375 | -4.300928 | 0.815933  |
| H | -4.698206 | -5.375363 | 0.948284  |
| H | -5.059971 | -3.990500 | -0.090748 |
| H | -4.983415 | -3.784024 | 1.667226  |
| C | -0.234196 | -2.905724 | 3.010503  |
| H | -0.428257 | -1.863101 | 3.283579  |
| H | 0.846156  | -3.042276 | 2.924936  |
| H | -0.581256 | -3.521839 | 3.842168  |
| H | 5.563558  | -1.930764 | 1.322835  |
| H | 2.299737  | 2.700574  | -2.286889 |
| C | -2.179623 | 2.198586  | -2.175336 |
| C | -0.802554 | 2.191750  | -2.409835 |

|    |           |          |           |
|----|-----------|----------|-----------|
| C  | -2.753746 | 2.431822 | -0.894647 |
| H  | -2.863640 | 1.993930 | -2.988091 |
| C  | -0.316878 | 1.919467 | -3.819759 |
| O  | 0.097171  | 2.398424 | -1.539920 |
| O  | -4.107262 | 2.334510 | -0.899782 |
| O  | -2.167487 | 2.690032 | 0.171975  |
| H  | -1.115255 | 1.600670 | -4.492568 |
| H  | 0.138401  | 2.832455 | -4.216963 |
| H  | 0.461746  | 1.152729 | -3.781177 |
| Li | -0.354883 | 3.260175 | 0.043367  |
| C  | -4.770814 | 2.696881 | 0.312093  |
| O  | 0.549818  | 2.514396 | 1.590271  |
| Cl | -0.049897 | 5.534818 | 0.206492  |
| C  | -6.258481 | 2.585879 | 0.057335  |
| H  | -4.450380 | 2.029119 | 1.118309  |
| H  | -4.484282 | 3.716201 | 0.590675  |
| C  | -0.211383 | 2.695914 | 2.790592  |
| C  | 1.908273  | 2.941250 | 1.801465  |
| H  | -6.520454 | 1.562504 | -0.223049 |
| H  | -6.815264 | 2.855779 | 0.957949  |
| H  | -6.560788 | 3.255063 | -0.751734 |
| C  | 0.558412  | 3.736408 | 3.590269  |
| H  | -1.221035 | 2.997556 | 2.500557  |
| H  | -0.253296 | 1.738843 | 3.331334  |
| C  | 2.001006  | 3.333372 | 3.276147  |
| H  | 2.577233  | 2.117967 | 1.533669  |
| H  | 2.090924  | 3.792897 | 1.137563  |
| H  | 0.319555  | 3.712749 | 4.655350  |
| H  | 0.348880  | 4.732343 | 3.190023  |
| H  | 2.723825  | 4.133549 | 3.444527  |
| H  | 2.290419  | 2.467340 | 3.880436  |

Vibrational frequencies

|          |          |          |
|----------|----------|----------|
| 13.9154  | 25.7312  | 28.3328  |
| 30.5119  | 41.5480  | 43.9993  |
| 47.7124  | 48.7237  | 50.4694  |
| 58.5982  | 66.3423  | 69.7654  |
| 75.3770  | 79.7000  | 85.3223  |
| 86.7337  | 91.8963  | 100.5570 |
| 104.6413 | 111.1251 | 112.2931 |
| 116.8219 | 117.3166 | 125.0560 |
| 128.0926 | 130.5565 | 137.8970 |
| 145.6406 | 146.4320 | 147.4413 |
| 150.8386 | 167.2906 | 168.7104 |
| 173.4755 | 175.0702 | 180.3820 |

|           |           |           |
|-----------|-----------|-----------|
| 188.6584  | 197.9553  | 207.3438  |
| 213.9873  | 214.2503  | 216.4929  |
| 237.5966  | 249.9198  | 259.7012  |
| 265.9613  | 269.8682  | 282.4869  |
| 286.7828  | 287.4353  | 297.4951  |
| 302.3934  | 307.1181  | 326.9487  |
| 329.8235  | 335.8597  | 338.8834  |
| 349.5742  | 353.1502  | 380.3941  |
| 389.3347  | 394.1537  | 406.8062  |
| 410.8471  | 424.9519  | 438.3563  |
| 441.7577  | 449.9130  | 470.7388  |
| 478.4973  | 486.2582  | 493.6766  |
| 495.6033  | 503.6514  | 521.8828  |
| 535.8897  | 547.1394  | 557.6070  |
| 575.6910  | 581.7740  | 583.3619  |
| 585.9200  | 598.3498  | 605.5043  |
| 625.4702  | 630.8277  | 633.6729  |
| 638.8992  | 649.9583  | 659.1623  |
| 687.8570  | 690.5295  | 692.4133  |
| 704.6500  | 710.9452  | 725.7449  |
| 749.4230  | 752.5313  | 754.1203  |
| 776.9481  | 780.8818  | 784.8274  |
| 790.5923  | 802.2150  | 810.8797  |
| 818.2648  | 820.8862  | 842.6205  |
| 861.0107  | 863.9010  | 868.5409  |
| 878.1662  | 884.9148  | 887.0374  |
| 898.4142  | 900.5241  | 905.2953  |
| 924.3466  | 928.6289  | 937.6587  |
| 947.8478  | 952.0149  | 954.4999  |
| 962.9701  | 968.7527  | 976.7232  |
| 981.9440  | 990.3743  | 995.9790  |
| 996.7508  | 1000.2688 | 1002.3052 |
| 1019.4606 | 1025.7631 | 1027.9182 |
| 1041.4927 | 1042.7468 | 1047.1017 |
| 1048.5441 | 1050.7276 | 1054.0384 |
| 1055.2929 | 1056.0510 | 1056.7346 |
| 1060.2491 | 1062.0539 | 1063.9116 |
| 1065.9828 | 1074.0093 | 1082.3422 |
| 1120.0214 | 1130.4949 | 1130.7749 |
| 1135.1959 | 1141.9251 | 1156.5961 |
| 1173.7553 | 1176.9474 | 1180.7528 |
| 1185.3241 | 1185.5092 | 1189.4093 |
| 1196.9614 | 1205.3288 | 1207.3491 |
| 1212.9513 | 1219.1218 | 1220.3115 |

|           |           |           |
|-----------|-----------|-----------|
| 1227.9228 | 1248.4790 | 1253.5795 |
| 1267.9027 | 1275.5382 | 1282.0833 |
| 1286.6982 | 1288.7126 | 1290.3248 |
| 1297.0939 | 1304.7861 | 1309.4417 |
| 1316.2589 | 1326.2274 | 1329.1100 |
| 1333.3964 | 1342.1878 | 1346.2665 |
| 1361.6067 | 1362.6114 | 1363.6930 |
| 1372.2673 | 1373.0613 | 1378.0090 |
| 1386.0345 | 1387.6398 | 1391.7770 |
| 1400.0253 | 1410.8421 | 1419.7835 |
| 1422.4906 | 1423.2142 | 1431.6847 |
| 1436.4950 | 1457.2485 | 1464.5881 |
| 1471.5174 | 1475.7444 | 1476.6027 |
| 1481.0442 | 1489.5898 | 1492.7935 |
| 1492.9042 | 1495.1553 | 1497.8871 |
| 1501.6805 | 1503.9000 | 1504.9603 |
| 1510.5374 | 1511.1634 | 1511.6237 |
| 1517.2719 | 1523.2330 | 1527.1417 |
| 1527.9016 | 1534.9476 | 1535.5884 |
| 1538.8418 | 1549.9572 | 1559.4343 |
| 1569.3809 | 1577.6259 | 1656.0288 |
| 1663.5582 | 1676.4538 | 1678.2902 |
| 1684.3917 | 1693.2832 | 1693.7058 |
| 1700.8104 | 1724.7357 | 1801.7103 |
| 2405.0733 | 3041.4026 | 3066.7828 |
| 3070.4172 | 3071.7366 | 3077.6001 |
| 3079.2378 | 3080.7903 | 3084.6996 |
| 3086.5049 | 3089.8187 | 3092.8879 |
| 3101.2295 | 3104.4269 | 3133.4752 |
| 3135.1895 | 3140.0437 | 3142.8420 |
| 3145.4237 | 3145.6684 | 3148.3095 |
| 3150.5126 | 3154.7561 | 3158.3620 |
| 3162.6572 | 3166.2270 | 3167.6568 |
| 3168.9901 | 3169.5806 | 3170.3688 |
| 3181.8839 | 3196.9232 | 3199.3735 |
| 3203.6838 | 3205.0272 | 3209.7811 |
| 3213.7811 | 3223.6382 | 3226.1323 |
| 3229.2752 | 3235.8346 | 3240.0633 |
| 3240.9999 | 3242.9594 | 3244.5410 |

#### **M4'**

Zero-point correction= 0.667966

Thermal correction to Energy= 0.710238

Thermal correction to Enthalpy= 0.711183

Thermal correction to Gibbs Free Energy= 0.592994  
Sum of electronic and zero-point Energies= -2025.235692  
Sum of electronic and thermal Energies= -2025.193419  
Sum of electronic and thermal Enthalpies= -2025.192475  
Sum of electronic and thermal Free Energies= -2025.310663

Cartesian coordinates

|   |           |           |           |
|---|-----------|-----------|-----------|
| C | 0.341344  | -0.917721 | 1.670457  |
| C | -0.952191 | -0.265899 | 1.598156  |
| C | -1.488083 | 0.353998  | 0.510061  |
| O | 0.989495  | -1.047994 | 2.694241  |
| C | -2.910790 | 0.702318  | 0.379646  |
| C | -3.330953 | 1.663722  | -0.547669 |
| C | -3.860425 | 0.017088  | 1.153675  |
| C | -4.687610 | 1.918892  | -0.707883 |
| H | -2.596561 | 2.243140  | -1.102845 |
| C | -5.212517 | 0.287761  | 0.994872  |
| H | -3.542132 | -0.752031 | 1.850540  |
| C | -5.628238 | 1.233790  | 0.056201  |
| H | -5.008785 | 2.671567  | -1.419662 |
| H | -5.943268 | -0.249837 | 1.590360  |
| H | -6.686168 | 1.438927  | -0.072750 |
| C | -0.656513 | 0.554667  | -0.655075 |
| N | 0.038033  | 0.662782  | -1.576886 |
| H | -1.499824 | -0.262430 | 2.535033  |
| C | 0.890409  | -1.666597 | 0.462286  |
| C | 2.285092  | -2.739482 | -0.818045 |
| C | 3.375633  | -1.339971 | 0.946691  |
| H | 3.162763  | -1.474789 | 2.009442  |
| N | 1.100000  | -3.120594 | -1.208274 |
| N | 0.240429  | -2.448531 | -0.403636 |
| N | 2.199329  | -1.855430 | 0.219567  |
| C | 3.619241  | -3.211558 | -1.313654 |
| H | 3.626146  | -3.223686 | -2.404160 |
| H | 3.789355  | -4.232889 | -0.944979 |
| C | 4.626021  | -2.151446 | 0.531340  |
| O | 4.623828  | -2.331299 | -0.877781 |
| C | 5.171666  | 0.159622  | 0.637833  |
| C | 3.776114  | 0.086852  | 0.638330  |
| C | 2.992598  | 1.214614  | 0.436634  |
| C | 3.637569  | 2.439439  | 0.248704  |
| C | 5.029384  | 2.519964  | 0.263435  |
| C | 5.808900  | 1.378660  | 0.453168  |
| C | 5.781452  | -1.205256 | 0.859299  |
| H | 1.905879  | 1.177671  | 0.393378  |

|   |           |           |           |
|---|-----------|-----------|-----------|
| H | 5.511294  | 3.480878  | 0.114040  |
| H | 6.892904  | 1.439993  | 0.446704  |
| H | 6.091161  | -1.339005 | 1.901417  |
| H | 6.640132  | -1.415983 | 0.217991  |
| C | -1.180787 | -2.670591 | -0.520343 |
| C | -1.867986 | -3.198243 | 0.578441  |
| C | -1.804029 | -2.353705 | -1.735267 |
| C | -3.252662 | -3.319558 | 0.462853  |
| C | -3.190635 | -2.485047 | -1.783246 |
| C | -3.932885 | -2.941651 | -0.693856 |
| H | -3.810133 | -3.722530 | 1.305051  |
| H | -3.702827 | -2.225920 | -2.706246 |
| C | -1.049492 | -1.954944 | -2.976527 |
| H | -0.789863 | -2.850122 | -3.550028 |
| H | -0.127773 | -1.417581 | -2.759851 |
| H | -1.676957 | -1.318612 | -3.603121 |
| C | -5.433838 | -3.010781 | -0.767854 |
| H | -5.766846 | -3.322210 | -1.760532 |
| H | -5.859281 | -2.020754 | -0.570168 |
| H | -5.837772 | -3.705055 | -0.028369 |
| C | -1.189309 | -3.646315 | 1.848809  |
| H | -1.257374 | -2.884117 | 2.632092  |
| H | -0.134402 | -3.889922 | 1.701934  |
| H | -1.686275 | -4.540900 | 2.228854  |
| H | 4.680632  | -3.122957 | 1.037632  |
| H | 3.032506  | 3.323838  | 0.085054  |
| C | -1.905466 | 2.812383  | 2.996307  |
| C | -1.832646 | 3.398810  | 1.586523  |
| H | -2.656238 | 2.011949  | 2.993894  |
| H | -0.955919 | 2.406200  | 3.352423  |
| H | -2.256930 | 3.579214  | 3.691707  |
| C | -0.628829 | 3.155464  | 0.873572  |
| C | -0.384768 | 3.580881  | -0.465673 |
| H | 0.208344  | 2.706048  | 1.395533  |
| O | 0.930727  | 3.349094  | -0.810940 |
| O | -2.834821 | 3.996928  | 1.162086  |
| O | -1.163210 | 4.047917  | -1.293905 |
| C | 1.284296  | 3.588022  | -2.169830 |
| C | 1.615940  | 5.051826  | -2.401685 |
| H | 2.153896  | 2.949751  | -2.353283 |
| H | 0.465793  | 3.265520  | -2.817648 |
| H | 1.929011  | 5.215012  | -3.436825 |
| H | 0.735267  | 5.665050  | -2.200154 |
| H | 2.427510  | 5.371762  | -1.741583 |



Vibrational frequencies

|           |           |           |
|-----------|-----------|-----------|
| 20.1297   | 26.1587   | 30.0477   |
| 42.7487   | 48.2151   | 53.9820   |
| 55.0774   | 60.5107   | 62.2906   |
| 65.1926   | 73.0893   | 81.0693   |
| 89.8630   | 92.9524   | 98.4818   |
| 103.1988  | 105.8352  | 107.8520  |
| 121.8508  | 127.5303  | 131.5324  |
| 135.4818  | 143.9910  | 147.4491  |
| 156.7093  | 166.8027  | 176.2254  |
| 180.1213  | 193.2467  | 197.6420  |
| 205.0329  | 211.0993  | 212.2201  |
| 218.4611  | 233.9617  | 240.2079  |
| 254.1582  | 277.1194  | 283.0287  |
| 291.9458  | 295.9631  | 318.3692  |
| 324.9100  | 327.8105  | 335.4711  |
| 346.3348  | 362.3652  | 364.2404  |
| 385.5145  | 395.9340  | 398.2829  |
| 408.1399  | 418.5434  | 437.1840  |
| 444.8793  | 463.6350  | 466.9518  |
| 481.8716  | 493.5979  | 496.8005  |
| 505.4514  | 519.8008  | 536.9929  |
| 557.2674  | 568.6466  | 573.8466  |
| 582.7667  | 584.6840  | 596.8326  |
| 608.6903  | 624.5278  | 631.3862  |
| 640.5563  | 643.8342  | 652.4532  |
| 686.4141  | 697.2201  | 705.1940  |
| 709.6241  | 725.7591  | 729.8474  |
| 737.7170  | 746.6169  | 753.8310  |
| 772.9050  | 777.4972  | 793.0598  |
| 794.2192  | 809.6887  | 816.7833  |
| 824.6506  | 841.8270  | 857.9501  |
| 868.3509  | 872.6911  | 879.8967  |
| 882.4390  | 889.3310  | 900.1043  |
| 921.5386  | 923.5217  | 958.4131  |
| 961.5683  | 963.3145  | 969.2583  |
| 978.0690  | 978.4979  | 992.0899  |
| 995.8926  | 1000.9050 | 1020.1386 |
| 1022.9865 | 1027.5515 | 1029.0537 |
| 1038.8463 | 1039.6500 | 1041.9441 |
| 1043.4306 | 1046.7212 | 1053.3775 |
| 1054.5426 | 1061.3245 | 1065.2316 |
| 1065.4473 | 1066.9929 | 1074.7194 |
| 1079.9249 | 1113.9279 | 1118.3207 |

|           |           |           |
|-----------|-----------|-----------|
| 1137.7630 | 1141.6782 | 1152.5230 |
| 1177.9051 | 1180.9931 | 1181.1512 |
| 1185.2105 | 1190.8137 | 1200.4193 |
| 1207.4762 | 1212.5673 | 1222.3686 |
| 1228.4964 | 1244.2186 | 1253.2792 |
| 1257.5017 | 1271.3794 | 1285.6187 |
| 1287.1855 | 1290.9353 | 1310.3022 |
| 1316.6816 | 1333.9053 | 1335.8310 |
| 1338.5809 | 1341.6513 | 1343.0393 |
| 1361.8164 | 1362.5610 | 1373.3967 |
| 1375.2700 | 1379.4162 | 1382.6315 |
| 1383.1073 | 1395.5838 | 1407.8296 |
| 1417.5427 | 1423.1539 | 1426.5025 |
| 1432.3513 | 1459.6226 | 1465.8363 |
| 1471.0642 | 1472.2363 | 1480.6215 |
| 1482.7070 | 1486.9898 | 1489.1071 |
| 1491.1457 | 1494.4166 | 1495.4060 |
| 1501.8790 | 1508.4888 | 1511.6965 |
| 1513.0634 | 1515.6176 | 1517.5918 |
| 1523.9510 | 1529.9396 | 1533.6945 |
| 1534.4589 | 1548.1624 | 1569.2733 |
| 1629.2006 | 1663.6067 | 1669.6739 |
| 1670.0245 | 1683.6638 | 1686.1546 |
| 1689.7221 | 1690.8720 | 1703.2947 |
| 1754.8502 | 1781.9849 | 2390.7575 |
| 3053.5257 | 3062.7765 | 3067.3986 |
| 3070.7714 | 3073.4263 | 3086.8077 |
| 3089.3055 | 3096.7515 | 3101.6599 |
| 3131.7644 | 3141.6011 | 3143.6673 |
| 3146.5917 | 3153.3847 | 3154.3577 |
| 3156.6613 | 3165.5022 | 3165.6593 |
| 3166.5081 | 3167.8196 | 3172.9407 |
| 3173.5322 | 3190.7917 | 3198.4781 |
| 3201.9080 | 3203.4158 | 3204.1432 |
| 3208.4985 | 3212.3935 | 3216.5096 |
| 3220.4352 | 3221.4243 | 3224.7482 |
| 3227.4441 | 3231.3872 | 3239.7546 |

### **TSSR**

Zero-point correction= 0.793055

Thermal correction to Energy= 0.843017

Thermal correction to Enthalpy= 0.843961

Thermal correction to Gibbs Free Energy= 0.709501

Sum of electronic and zero-point Energies= -2725.344528

Sum of electronic and thermal Energies= -2725.294566

Sum of electronic and thermal Enthalpies= -2725.293621

Sum of electronic and thermal Free Energies= -2725.428081

Cartesian coordinates

|   |           |           |           |
|---|-----------|-----------|-----------|
| C | 0.585342  | -0.464946 | 0.991527  |
| C | -0.542335 | 0.261346  | 0.539972  |
| C | -1.319188 | 0.020662  | -0.611803 |
| O | 1.332309  | -0.164030 | 1.929840  |
| C | -2.810423 | -0.047641 | -0.569904 |
| C | -3.541396 | -0.445761 | -1.695659 |
| C | -3.489675 | 0.276870  | 0.605864  |
| C | -4.926746 | -0.515528 | -1.646032 |
| H | -3.019723 | -0.702557 | -2.615730 |
| C | -4.880825 | 0.230571  | 0.646223  |
| H | -2.934047 | 0.546544  | 1.498689  |
| C | -5.602524 | -0.171178 | -0.474036 |
| H | -5.481697 | -0.833701 | -2.522139 |
| H | -5.398758 | 0.489719  | 1.564855  |
| H | -6.686179 | -0.220048 | -0.435217 |
| C | -0.682389 | -0.781106 | -1.643092 |
| N | -0.120608 | -1.379051 | -2.461734 |
| H | -0.859970 | 1.047723  | 1.217608  |
| C | 0.841590  | -1.887331 | 0.496519  |
| C | 1.896834  | -3.741570 | 0.046272  |
| C | 3.391123  | -1.790458 | 0.528649  |
| H | 3.329844  | -1.330727 | 1.518867  |
| N | 0.641601  | -4.077152 | 0.121619  |
| N | -0.006012 | -2.916028 | 0.411559  |
| N | 2.068204  | -2.407602 | 0.296592  |
| C | 3.074269  | -4.624521 | -0.230930 |
| H | 2.863127  | -5.261418 | -1.091145 |
| H | 3.266322  | -5.260375 | 0.644184  |
| C | 4.481347  | -2.893795 | 0.490234  |
| O | 4.186477  | -3.823282 | -0.541061 |
| C | 5.228632  | -0.981914 | -0.728050 |
| C | 3.865244  | -0.789417 | -0.499137 |
| C | 3.178183  | 0.265588  | -1.081592 |
| C | 3.880510  | 1.134942  | -1.916936 |
| C | 5.239853  | 0.938436  | -2.162132 |
| C | 5.924218  | -0.122261 | -1.568958 |
| C | 5.751430  | -2.147463 | 0.077347  |
| H | 2.124792  | 0.447104  | -0.891470 |
| H | 5.772254  | 1.623102  | -2.815544 |
| H | 6.983507  | -0.270462 | -1.755767 |

|    |           |           |           |
|----|-----------|-----------|-----------|
| H  | 6.288503  | -1.797304 | 0.965184  |
| H  | 6.414997  | -2.812646 | -0.480217 |
| C  | -1.422370 | -2.953923 | 0.690017  |
| C  | -1.856948 | -2.606536 | 1.980037  |
| C  | -2.294285 | -3.397276 | -0.308818 |
| C  | -3.224998 | -2.649193 | 2.223498  |
| C  | -3.658282 | -3.408191 | -0.003935 |
| C  | -4.143633 | -3.029965 | 1.242267  |
| H  | -3.584379 | -2.375638 | 3.213035  |
| H  | -4.355573 | -3.723185 | -0.776692 |
| C  | -1.857062 | -3.892760 | -1.663627 |
| H  | -1.976314 | -4.981066 | -1.708582 |
| H  | -0.822425 | -3.653903 | -1.898061 |
| H  | -2.495092 | -3.454525 | -2.438258 |
| C  | -5.617203 | -3.063139 | 1.544783  |
| H  | -5.875480 | -3.962838 | 2.112417  |
| H  | -6.205926 | -3.060499 | 0.624762  |
| H  | -5.911376 | -2.197182 | 2.144254  |
| C  | -0.920057 | -2.212680 | 3.094432  |
| H  | -0.778146 | -1.128727 | 3.135775  |
| H  | 0.067681  | -2.671136 | 2.991670  |
| H  | -1.340116 | -2.529285 | 4.050766  |
| H  | 4.567893  | -3.416889 | 1.450778  |
| H  | 3.355572  | 1.976580  | -2.357812 |
| C  | -1.294853 | 1.871381  | -1.882022 |
| C  | 0.118540  | 1.998168  | -2.111268 |
| C  | -1.974816 | 2.712313  | -0.908282 |
| H  | -1.908292 | 1.566857  | -2.722110 |
| C  | 0.669929  | 1.533468  | -3.437952 |
| O  | 0.905003  | 2.421539  | -1.246633 |
| O  | -3.271914 | 2.857434  | -1.189159 |
| O  | -1.470948 | 3.215834  | 0.095059  |
| H  | -0.101867 | 1.139601  | -4.098979 |
| H  | 1.158953  | 2.385123  | -3.921024 |
| H  | 1.425721  | 0.761056  | -3.270875 |
| Li | 0.425686  | 3.554211  | 0.212630  |
| C  | -4.045800 | 3.623993  | -0.248379 |
| O  | 1.307058  | 2.944732  | 1.807462  |
| Cl | 1.006702  | 5.730986  | -0.054833 |
| C  | -5.457476 | 3.689701  | -0.784486 |
| H  | -4.001081 | 3.126053  | 0.725280  |
| H  | -3.593654 | 4.613921  | -0.146168 |
| C  | 1.245322  | 3.839849  | 2.933148  |
| C  | 2.679907  | 2.662082  | 1.470881  |

|   |           |          |           |
|---|-----------|----------|-----------|
| H | -5.874500 | 2.684515 | -0.882281 |
| H | -6.085060 | 4.265165 | -0.100337 |
| H | -5.475181 | 4.174190 | -1.762885 |
| C | 2.659048  | 4.381916 | 3.099263  |
| H | 0.511389  | 4.618507 | 2.709853  |
| H | 0.923687  | 3.270551 | 3.812591  |
| C | 3.500963  | 3.187628 | 2.643505  |
| H | 2.769166  | 1.585712 | 1.311076  |
| H | 2.926406  | 3.192247 | 0.541800  |
| H | 2.867517  | 4.699497 | 4.122465  |
| H | 2.803738  | 5.227214 | 2.420128  |
| H | 4.516391  | 3.458712 | 2.348821  |
| H | 3.556216  | 2.433869 | 3.435915  |

Vibrational frequencies

|           |          |          |
|-----------|----------|----------|
| -275.0641 | 15.9847  | 22.7441  |
| 27.2188   | 38.5315  | 41.9949  |
| 44.0153   | 50.8249  | 54.6861  |
| 58.4760   | 62.5624  | 66.4569  |
| 72.4409   | 74.4898  | 78.6690  |
| 87.0760   | 92.3678  | 95.6103  |
| 102.4083  | 106.3188 | 110.9099 |
| 118.4761  | 121.3434 | 125.9963 |
| 133.6085  | 136.0048 | 140.5871 |
| 143.6704  | 151.1597 | 151.2935 |
| 159.9787  | 161.0187 | 164.7551 |
| 169.7492  | 173.9086 | 181.1562 |
| 192.0302  | 200.9094 | 209.3812 |
| 213.8788  | 216.1596 | 222.9140 |
| 238.5675  | 239.2674 | 249.9079 |
| 269.4252  | 276.5110 | 280.0094 |
| 281.6460  | 285.1097 | 286.3094 |
| 300.2686  | 307.1145 | 322.4735 |
| 331.8854  | 335.7867 | 350.4566 |
| 351.3327  | 362.9363 | 391.2976 |
| 392.8302  | 402.0003 | 416.6412 |
| 418.1328  | 425.1500 | 435.6012 |
| 446.5815  | 448.4352 | 468.5667 |
| 477.8685  | 483.3115 | 494.0927 |
| 501.5914  | 514.9426 | 526.8293 |
| 531.4417  | 537.1667 | 561.4492 |
| 572.7138  | 576.6727 | 583.2466 |
| 585.7507  | 592.3378 | 599.9813 |
| 605.5130  | 625.6846 | 629.2299 |
| 631.8150  | 641.5906 | 650.8538 |

|           |           |           |
|-----------|-----------|-----------|
| 673.8650  | 684.8442  | 693.5758  |
| 707.1025  | 713.8576  | 722.6469  |
| 751.1069  | 755.3924  | 760.2181  |
| 772.1916  | 778.8530  | 792.1381  |
| 796.0160  | 807.0662  | 808.5556  |
| 811.8141  | 818.5259  | 846.0022  |
| 857.6446  | 866.5482  | 875.3620  |
| 881.0475  | 883.5933  | 889.9746  |
| 900.5266  | 901.5237  | 902.1433  |
| 917.5965  | 922.3779  | 924.5380  |
| 937.8960  | 950.4108  | 956.4903  |
| 958.0827  | 973.2309  | 977.3532  |
| 978.6565  | 981.5145  | 992.6708  |
| 997.9886  | 1005.6659 | 1013.4980 |
| 1022.0247 | 1024.5339 | 1029.7661 |
| 1032.7732 | 1040.0313 | 1045.4907 |
| 1047.8010 | 1051.9739 | 1055.5876 |
| 1056.3922 | 1057.2011 | 1058.8327 |
| 1062.5186 | 1064.5476 | 1067.3095 |
| 1072.2076 | 1072.3753 | 1082.4648 |
| 1113.7954 | 1119.0281 | 1124.1877 |
| 1124.8847 | 1138.4542 | 1154.1977 |
| 1169.8919 | 1173.5620 | 1179.5712 |
| 1181.3182 | 1184.7790 | 1191.6087 |
| 1205.2671 | 1208.2106 | 1209.2114 |
| 1212.2265 | 1212.7036 | 1217.3794 |
| 1234.3570 | 1250.5941 | 1257.2213 |
| 1266.7934 | 1276.1141 | 1278.2120 |
| 1286.3155 | 1287.4094 | 1288.1116 |
| 1290.7496 | 1306.6689 | 1308.5583 |
| 1311.7373 | 1324.3137 | 1327.3412 |
| 1331.0683 | 1340.4633 | 1349.5661 |
| 1354.8657 | 1357.1377 | 1366.8446 |
| 1369.0826 | 1375.8883 | 1380.1819 |
| 1388.8672 | 1390.9493 | 1395.5438 |
| 1401.6411 | 1416.5632 | 1420.1331 |
| 1421.4588 | 1424.0607 | 1430.3229 |
| 1436.9177 | 1455.3126 | 1465.3950 |
| 1470.4091 | 1471.0040 | 1475.9180 |
| 1481.9622 | 1485.7385 | 1486.5132 |
| 1491.9830 | 1492.7709 | 1494.9547 |
| 1496.7939 | 1498.0382 | 1501.6585 |
| 1504.4435 | 1506.5559 | 1506.9812 |
| 1511.2465 | 1512.5958 | 1514.4552 |

|           |           |           |
|-----------|-----------|-----------|
| 1516.7608 | 1524.9381 | 1526.2782 |
| 1532.9232 | 1536.3394 | 1537.6621 |
| 1550.2290 | 1567.1788 | 1664.1940 |
| 1673.1524 | 1675.0750 | 1681.9066 |
| 1686.6118 | 1691.0438 | 1696.9556 |
| 1697.3438 | 1705.6276 | 1761.3405 |
| 2395.3363 | 3066.7868 | 3069.4667 |
| 3072.9194 | 3074.1597 | 3078.7464 |
| 3078.9510 | 3079.5595 | 3080.7461 |
| 3085.8282 | 3087.6643 | 3096.5327 |
| 3098.9061 | 3102.9273 | 3128.9354 |
| 3134.4925 | 3146.2684 | 3149.4568 |
| 3150.5000 | 3150.7677 | 3151.7595 |
| 3155.0155 | 3159.1143 | 3165.4237 |
| 3166.9975 | 3168.3689 | 3168.6042 |
| 3171.3716 | 3173.2431 | 3174.6364 |
| 3185.5683 | 3187.3756 | 3187.7156 |
| 3191.0821 | 3201.7611 | 3204.0834 |
| 3212.4219 | 3216.6538 | 3218.9594 |
| 3222.2087 | 3225.5923 | 3232.3887 |
| 3234.6210 | 3235.7660 | 3240.5048 |

### TS5R<sup>b</sup>

Zero-point correction= 0.793611

Thermal correction to Energy= 0.843178

Thermal correction to Enthalpy= 0.844122

Thermal correction to Gibbs Free Energy= 0.712833

Sum of electronic and zero-point Energies= -2725.341130

Sum of electronic and thermal Energies= -2725.291563

Sum of electronic and thermal Enthalpies= -2725.290619

Sum of electronic and thermal Free Energies= -2725.421908

Cartesian coordinates

|   |           |           |           |
|---|-----------|-----------|-----------|
| C | 0.693481  | -0.299100 | 0.860639  |
| C | -0.494812 | 0.335105  | 0.438351  |
| C | -1.360324 | 0.001577  | -0.624442 |
| O | 1.503711  | 0.147537  | 1.684442  |
| C | -2.840079 | -0.044725 | -0.415332 |
| C | -3.669125 | -0.702854 | -1.327051 |
| C | -3.406829 | 0.577659  | 0.703484  |
| C | -5.042984 | -0.753485 | -1.118833 |
| H | -3.237087 | -1.189233 | -2.198430 |
| C | -4.783146 | 0.534553  | 0.901164  |
| H | -2.780478 | 1.102295  | 1.420337  |
| C | -5.604919 | -0.134633 | -0.004279 |

|   |           |           |           |
|---|-----------|-----------|-----------|
| H | -5.674512 | -1.280274 | -1.827370 |
| H | -5.212499 | 1.020265  | 1.771739  |
| H | -6.677281 | -0.176395 | 0.159627  |
| C | -0.821613 | -0.915040 | -1.617046 |
| N | -0.328099 | -1.569902 | -2.435552 |
| H | -0.787002 | 1.143643  | 1.105562  |
| C | 0.998015  | -1.758448 | 0.516508  |
| C | 2.150450  | -3.596100 | 0.281544  |
| C | 3.550344  | -1.546777 | 0.600103  |
| H | 3.459044  | -1.031091 | 1.558146  |
| N | 0.912213  | -3.983147 | 0.367238  |
| N | 0.201890  | -2.833684 | 0.521620  |
| N | 2.254796  | -2.237566 | 0.397339  |
| C | 3.368495  | -4.448224 | 0.098775  |
| H | 3.187996  | -5.183982 | -0.686011 |
| H | 3.592079  | -4.975790 | 1.036520  |
| C | 4.689845  | -2.600857 | 0.644256  |
| O | 4.438956  | -3.630063 | -0.300358 |
| C | 5.358986  | -0.749423 | -0.707498 |
| C | 3.990911  | -0.586547 | -0.480626 |
| C | 3.273948  | 0.418578  | -1.116140 |
| C | 3.946620  | 1.249386  | -2.012685 |
| C | 5.308577  | 1.076588  | -2.259580 |
| C | 6.026028  | 0.076221  | -1.603731 |
| C | 5.927229  | -1.837720 | 0.169910  |
| H | 2.219917  | 0.592186  | -0.923506 |
| H | 5.815912  | 1.731507  | -2.960683 |
| H | 7.088600  | -0.052790 | -1.786181 |
| H | 6.455474  | -1.406839 | 1.027023  |
| H | 6.613070  | -2.514335 | -0.345416 |
| C | -1.224735 | -2.937021 | 0.725305  |
| C | -1.793630 | -2.393106 | 1.883916  |
| C | -1.971849 | -3.663849 | -0.218739 |
| C | -3.176297 | -2.519213 | 2.034539  |
| C | -3.343340 | -3.759066 | -0.003690 |
| C | -3.967933 | -3.182809 | 1.103736  |
| H | -3.638617 | -2.083311 | 2.916923  |
| H | -3.943948 | -4.298323 | -0.732514 |
| C | -1.365221 | -4.372331 | -1.403003 |
| H | -1.014947 | -5.365447 | -1.107383 |
| H | -0.519579 | -3.833515 | -1.828270 |
| H | -2.121108 | -4.493933 | -2.181674 |
| C | -5.453899 | -3.317466 | 1.301490  |
| H | -5.698291 | -4.291878 | 1.737265  |



|    |           |           |           |
|----|-----------|-----------|-----------|
| H  | -5.981157 | -3.235350 | 0.347715  |
| H  | -5.831730 | -2.541414 | 1.970405  |
| C  | -1.015103 | -1.703217 | 2.974713  |
| H  | -1.108680 | -0.614771 | 2.892873  |
| H  | 0.049240  | -1.945956 | 2.963670  |
| H  | -1.417118 | -1.999085 | 3.945916  |
| H  | 4.799902  | -3.037209 | 1.644780  |
| H  | 3.397281  | 2.046468  | -2.503576 |
| C  | -1.388364 | 1.634426  | -2.065883 |
| C  | 0.030698  | 1.843891  | -2.201899 |
| C  | -2.176752 | 2.604473  | -1.314964 |
| H  | -1.911757 | 1.189828  | -2.905791 |
| C  | 0.716486  | 1.310674  | -3.437820 |
| O  | 0.705972  | 2.372415  | -1.303763 |
| O  | -3.451204 | 2.632528  | -1.710494 |
| O  | -1.765174 | 3.317220  | -0.404894 |
| H  | 1.439166  | 0.539975  | -3.153935 |
| H  | 0.011852  | 0.886836  | -4.152814 |
| H  | 1.267423  | 2.128062  | -3.911697 |
| Li | 0.020312  | 3.283255  | 0.371533  |
| C  | -4.327767 | 3.513392  | -0.984649 |
| O  | 1.725219  | 4.276137  | 0.504252  |
| Cl | -0.571973 | 3.111810  | 2.653420  |
| C  | -5.717650 | 3.311467  | -1.543880 |
| H  | -4.273678 | 3.260935  | 0.078300  |
| H  | -3.975697 | 4.541365  | -1.110853 |
| C  | 2.696265  | 3.272291  | 0.861996  |
| C  | 1.838843  | 5.409854  | 1.385081  |
| H  | -6.029548 | 2.272658  | -1.410129 |
| H  | -6.423453 | 3.959992  | -1.020007 |
| H  | -5.745960 | 3.554872  | -2.608535 |
| C  | 3.176806  | 3.658611  | 2.253518  |
| H  | 2.216041  | 2.288462  | 0.830373  |
| H  | 3.509974  | 3.292031  | 0.125849  |
| C  | 3.117418  | 5.186264  | 2.188077  |
| H  | 1.860878  | 6.316895  | 0.775438  |
| H  | 0.958436  | 5.422823  | 2.035586  |
| H  | 4.172734  | 3.268910  | 2.473524  |
| H  | 2.467873  | 3.284434  | 2.997635  |
| H  | 3.074975  | 5.663059  | 3.169177  |
| H  | 3.984997  | 5.578797  | 1.647644  |

Vibrational frequencies

|           |         |         |
|-----------|---------|---------|
| -311.8047 | 25.7487 | 34.3614 |
| 40.3052   | 43.1378 | 43.8023 |

|           |           |           |
|-----------|-----------|-----------|
| 45.9926   | 53.7924   | 67.5221   |
| 71.0670   | 72.4957   | 77.4059   |
| 80.3467   | 84.2583   | 89.5544   |
| 93.8476   | 100.1737  | 107.2642  |
| 111.3005  | 111.7136  | 120.7014  |
| 123.0868  | 125.1431  | 127.7909  |
| 138.9890  | 139.6162  | 142.2234  |
| 145.1237  | 151.4452  | 162.7591  |
| 164.3458  | 167.1077  | 170.8564  |
| 180.1262  | 188.4658  | 193.1906  |
| 196.5114  | 204.6585  | 208.6824  |
| 211.3906  | 214.9428  | 221.2920  |
| 225.3790  | 232.3421  | 240.1040  |
| 260.3761  | 269.4552  | 275.8317  |
| 285.6509  | 287.2050  | 289.5377  |
| 299.0408  | 300.8462  | 308.5528  |
| 330.0750  | 335.8481  | 351.3386  |
| 352.0532  | 365.4195  | 375.1281  |
| 391.4439  | 400.2547  | 408.2190  |
| 410.6526  | 428.1967  | 431.7967  |
| 438.5223  | 445.1027  | 449.7404  |
| 470.1894  | 480.7787  | 494.6931  |
| 505.9860  | 514.7458  | 523.3674  |
| 531.7935  | 554.5435  | 562.3386  |
| 574.0393  | 580.4002  | 582.8545  |
| 583.3380  | 587.9299  | 598.4557  |
| 605.6807  | 626.2889  | 632.2827  |
| 636.9789  | 643.2903  | 653.5356  |
| 678.4052  | 691.0909  | 695.4027  |
| 705.7193  | 706.8119  | 723.3926  |
| 747.5891  | 756.5340  | 771.4182  |
| 775.3474  | 786.9783  | 791.1020  |
| 796.6641  | 808.7582  | 812.3620  |
| 818.3572  | 846.0893  | 861.1838  |
| 863.0378  | 868.1580  | 879.4212  |
| 879.7503  | 882.5571  | 894.4507  |
| 900.3891  | 901.3455  | 914.1820  |
| 919.7395  | 923.3908  | 930.3022  |
| 937.0522  | 946.4411  | 952.5331  |
| 962.3796  | 969.6427  | 978.0718  |
| 979.7344  | 980.9322  | 994.4493  |
| 995.5864  | 999.6439  | 1013.4639 |
| 1018.5084 | 1021.5440 | 1032.1626 |
| 1033.9119 | 1039.7943 | 1045.4056 |

|           |           |           |
|-----------|-----------|-----------|
| 1046.0837 | 1048.0270 | 1051.6240 |
| 1054.8874 | 1060.4122 | 1061.2316 |
| 1061.9928 | 1064.3185 | 1066.8175 |
| 1073.3952 | 1076.4285 | 1084.5482 |
| 1113.8339 | 1121.7388 | 1123.7103 |
| 1130.6654 | 1141.1123 | 1152.5335 |
| 1173.8935 | 1177.4652 | 1180.0134 |
| 1182.0557 | 1183.5938 | 1195.0579 |
| 1204.9543 | 1205.1310 | 1210.6581 |
| 1212.8598 | 1216.8492 | 1221.8199 |
| 1234.2307 | 1253.8300 | 1266.5329 |
| 1273.9934 | 1276.4611 | 1278.3972 |
| 1281.6073 | 1287.0723 | 1290.2771 |
| 1293.0719 | 1306.2651 | 1310.9954 |
| 1318.1668 | 1322.6545 | 1324.6360 |
| 1334.3485 | 1337.9834 | 1342.8650 |
| 1357.5307 | 1358.5752 | 1366.7642 |
| 1374.1848 | 1376.5871 | 1380.0586 |
| 1385.6976 | 1393.3005 | 1394.0163 |
| 1402.3674 | 1414.7597 | 1418.1036 |
| 1419.8493 | 1422.1390 | 1427.0974 |
| 1433.0777 | 1453.0243 | 1465.0514 |
| 1469.9185 | 1470.8859 | 1472.1650 |
| 1487.8830 | 1488.6929 | 1489.9647 |
| 1492.5533 | 1493.0764 | 1496.4670 |
| 1497.1588 | 1501.7888 | 1502.3988 |
| 1504.6694 | 1504.8259 | 1505.8464 |
| 1509.4883 | 1513.5036 | 1516.2822 |
| 1524.5122 | 1525.5586 | 1528.1185 |
| 1531.4132 | 1537.0039 | 1537.7762 |
| 1556.8418 | 1559.0349 | 1664.0360 |
| 1675.7077 | 1676.0232 | 1681.9583 |
| 1686.1170 | 1693.3584 | 1695.2739 |
| 1700.2651 | 1705.2335 | 1774.0503 |
| 2396.3406 | 3065.8548 | 3066.1806 |
| 3068.0646 | 3076.3033 | 3077.1384 |
| 3081.6677 | 3083.7156 | 3083.8053 |
| 3085.6395 | 3092.2160 | 3094.4904 |
| 3097.7533 | 3105.8606 | 3141.7724 |
| 3142.4151 | 3142.5684 | 3146.4176 |
| 3147.9481 | 3150.2539 | 3153.8772 |
| 3157.0707 | 3158.4615 | 3161.7260 |
| 3163.8547 | 3167.6042 | 3168.4231 |
| 3170.6309 | 3173.6385 | 3174.0502 |

|           |           |           |
|-----------|-----------|-----------|
| 3179.9955 | 3187.4840 | 3190.7319 |
| 3191.6127 | 3194.0837 | 3197.7349 |
| 3200.7092 | 3204.5435 | 3206.2010 |
| 3213.6539 | 3218.3819 | 3223.0886 |
| 3224.2512 | 3229.0866 | 3239.2652 |

### TS5R<sup>c</sup>

Zero-point correction= 0.792112

Thermal correction to Energy= 0.842420

Thermal correction to Enthalpy= 0.843364

Thermal correction to Gibbs Free Energy= 0.709735

Sum of electronic and zero-point Energies= -2725.341439

Sum of electronic and thermal Energies= -2725.291131

Sum of electronic and thermal Enthalpies= -2725.290187

Sum of electronic and thermal Free Energies= -2725.423817

Cartesian coordinates

|   |           |           |           |
|---|-----------|-----------|-----------|
| C | 0.217168  | -0.157151 | 0.948372  |
| C | -1.040136 | 0.401562  | 0.629423  |
| C | -1.768794 | 0.251427  | -0.545055 |
| O | 1.022115  | 0.312488  | 1.771157  |
| C | -3.251913 | 0.278953  | -0.593419 |
| C | -3.929569 | -0.004700 | -1.784754 |
| C | -3.987439 | 0.554073  | 0.564031  |
| C | -5.317654 | -0.027379 | -1.815033 |
| H | -3.366678 | -0.215739 | -2.690214 |
| C | -5.378007 | 0.550719  | 0.525142  |
| H | -3.479181 | 0.754048  | 1.501638  |
| C | -6.047154 | 0.251293  | -0.659524 |
| H | -5.831711 | -0.258762 | -2.741967 |
| H | -5.938743 | 0.770407  | 1.428449  |
| H | -7.132153 | 0.234870  | -0.682629 |
| C | -1.112333 | -0.417816 | -1.648140 |
| N | -0.557217 | -0.925800 | -2.530268 |
| H | -1.398601 | 1.124446  | 1.356060  |
| C | 0.557384  | -1.575063 | 0.513672  |
| C | 1.710329  | -3.412701 | 0.289877  |
| C | 3.092774  | -1.338842 | 0.404847  |
| H | 3.005025  | -0.560264 | 1.164188  |
| N | 0.465021  | -3.797208 | 0.347652  |
| N | -0.242592 | -2.646372 | 0.485467  |
| N | 1.808468  | -2.055379 | 0.388858  |
| C | 2.942505  | -4.268657 | 0.260050  |
| H | 2.832253  | -5.056999 | -0.485509 |
| H | 3.061384  | -4.731409 | 1.249752  |

|   |           |           |           |
|---|-----------|-----------|-----------|
| C | 4.231670  | -2.333773 | 0.717275  |
| O | 4.065597  | -3.497470 | -0.085266 |
| C | 4.918102  | -0.871798 | -1.017350 |
| C | 3.529620  | -0.755798 | -0.919481 |
| C | 2.776084  | -0.176252 | -1.926257 |
| C | 3.443393  | 0.290183  | -3.061873 |
| C | 4.832028  | 0.205226  | -3.155554 |
| C | 5.582438  | -0.373325 | -2.129588 |
| C | 5.471364  | -1.614256 | 0.179181  |
| H | 1.696434  | -0.089572 | -1.843930 |
| H | 5.333117  | 0.578760  | -4.042661 |
| H | 6.661653  | -0.458136 | -2.214842 |
| H | 5.869077  | -0.927373 | 0.935407  |
| H | 6.253953  | -2.333162 | -0.073317 |
| C | -1.675225 | -2.716863 | 0.669708  |
| C | -2.198884 | -2.382446 | 1.926929  |
| C | -2.465236 | -3.149726 | -0.397240 |
| C | -3.581678 | -2.428727 | 2.069272  |
| C | -3.848656 | -3.159179 | -0.197936 |
| C | -4.423657 | -2.796762 | 1.015478  |
| H | -4.014705 | -2.166160 | 3.031730  |
| H | -4.486865 | -3.465302 | -1.023209 |
| C | -1.904204 | -3.651867 | -1.702554 |
| H | -1.928109 | -4.746010 | -1.712393 |
| H | -0.877795 | -3.334676 | -1.878618 |
| H | -2.515895 | -3.294074 | -2.534443 |
| C | -5.915823 | -2.834903 | 1.211407  |
| H | -6.209459 | -3.738192 | 1.755863  |
| H | -6.438712 | -2.830086 | 0.252720  |
| H | -6.253502 | -1.971924 | 1.790886  |
| C | -1.328609 | -1.984714 | 3.090882  |
| H | -1.147080 | -0.905121 | 3.103680  |
| H | -0.358421 | -2.488621 | 3.071572  |
| H | -1.823535 | -2.244782 | 4.027938  |
| H | 4.283363  | -2.602249 | 1.779505  |
| H | 2.876953  | 0.724689  | -3.878849 |
| C | -1.470317 | 2.394078  | -1.531261 |
| C | -0.042227 | 2.363837  | -1.550616 |
| C | -2.226494 | 3.023546  | -0.461423 |
| H | -1.977123 | 2.356198  | -2.490533 |
| C | 0.617489  | 2.293673  | -2.911063 |
| O | 0.664619  | 2.322158  | -0.527087 |
| O | -3.475457 | 3.338003  | -0.877923 |
| O | -1.853485 | 3.236266  | 0.680604  |

|    |           |          |           |
|----|-----------|----------|-----------|
| H  | 0.454307  | 1.303789 | -3.355216 |
| H  | 0.185613  | 3.033255 | -3.589272 |
| H  | 1.688034  | 2.468379 | -2.801603 |
| Li | 1.423146  | 2.272703 | 1.216308  |
| C  | -4.318823 | 3.955991 | 0.101260  |
| O  | 3.312993  | 1.760931 | 0.920228  |
| Cl | 1.503764  | 3.913168 | 2.776748  |
| C  | -5.683713 | 4.127831 | -0.527701 |
| H  | -4.359502 | 3.320205 | 0.990914  |
| H  | -3.879638 | 4.914356 | 0.396923  |
| C  | 4.089444  | 1.656642 | 2.127866  |
| C  | 4.017183  | 2.553590 | -0.054338 |
| H  | -6.092692 | 3.155455 | -0.814392 |
| H  | -6.365891 | 4.597623 | 0.184770  |
| H  | -5.623431 | 4.758223 | -1.418029 |
| C  | 5.243205  | 2.639090 | 1.963033  |
| H  | 3.437801  | 1.885833 | 2.973724  |
| H  | 4.458969  | 0.624961 | 2.218239  |
| C  | 5.453255  | 2.617834 | 0.447467  |
| H  | 3.907433  | 2.069840 | -1.027591 |
| H  | 3.561911  | 3.551619 | -0.089817 |
| H  | 6.125796  | 2.344404 | 2.533653  |
| H  | 4.928856  | 3.635438 | 2.288517  |
| H  | 5.989482  | 3.489403 | 0.067851  |
| H  | 5.994414  | 1.713647 | 0.145677  |

Vibrational frequencies

|           |          |          |
|-----------|----------|----------|
| -234.0918 | 23.5092  | 35.0283  |
| 40.2642   | 42.2981  | 47.6944  |
| 52.7946   | 58.8254  | 62.5569  |
| 64.1269   | 66.6751  | 70.8021  |
| 76.5495   | 78.1896  | 81.3733  |
| 88.5557   | 91.5959  | 94.7697  |
| 102.1449  | 104.6384 | 109.3507 |
| 114.5835  | 120.5713 | 123.6052 |
| 126.8555  | 128.9422 | 134.4423 |
| 137.2011  | 146.1536 | 148.7293 |
| 153.3257  | 160.2276 | 164.3616 |
| 166.8304  | 169.8177 | 177.4162 |
| 180.5853  | 187.6147 | 192.8047 |
| 203.1907  | 208.8586 | 211.3176 |
| 226.2767  | 244.2887 | 247.9764 |
| 253.0382  | 253.4752 | 271.0347 |
| 283.1650  | 284.0280 | 292.3060 |
| 296.1285  | 304.6750 | 307.4751 |

|           |           |           |
|-----------|-----------|-----------|
| 328.2900  | 334.1493  | 340.2082  |
| 345.3530  | 353.9014  | 361.8168  |
| 381.1823  | 393.4798  | 404.4848  |
| 411.3392  | 412.7138  | 423.5854  |
| 428.5346  | 430.5372  | 447.7230  |
| 476.0872  | 485.1314  | 500.9555  |
| 503.5815  | 505.0387  | 506.0224  |
| 523.6315  | 537.1841  | 554.0874  |
| 576.4902  | 579.7736  | 581.4727  |
| 582.4456  | 586.9691  | 592.2731  |
| 600.1414  | 625.1634  | 629.3327  |
| 633.9577  | 639.8956  | 654.5871  |
| 683.8411  | 690.2212  | 690.8612  |
| 705.7932  | 714.2735  | 725.3434  |
| 750.9350  | 751.3305  | 758.6294  |
| 764.0324  | 778.2004  | 782.2366  |
| 791.7019  | 807.5359  | 812.0776  |
| 821.6135  | 829.0301  | 839.9977  |
| 858.8470  | 866.2126  | 869.3748  |
| 876.0021  | 880.5543  | 884.6691  |
| 893.2302  | 898.9302  | 903.5241  |
| 922.7313  | 922.8977  | 932.0379  |
| 939.6705  | 946.8181  | 951.9837  |
| 958.6795  | 966.3447  | 970.4048  |
| 976.0900  | 981.3194  | 983.0497  |
| 997.4766  | 998.8321  | 999.7367  |
| 1016.0659 | 1018.0181 | 1022.7138 |
| 1023.1655 | 1039.5513 | 1041.3368 |
| 1044.3619 | 1047.5392 | 1050.1816 |
| 1055.2020 | 1055.6870 | 1058.6051 |
| 1059.4540 | 1060.0080 | 1065.0623 |
| 1067.4079 | 1075.4440 | 1078.5757 |
| 1114.8608 | 1123.4333 | 1127.7938 |
| 1130.7516 | 1141.8251 | 1155.1326 |
| 1175.1289 | 1175.6286 | 1180.2004 |
| 1182.3015 | 1183.5877 | 1189.3196 |
| 1195.0952 | 1207.5599 | 1208.5803 |
| 1213.7752 | 1214.9829 | 1221.7934 |
| 1234.5664 | 1256.1171 | 1258.8559 |
| 1268.5625 | 1279.5967 | 1280.6260 |
| 1282.8335 | 1286.4734 | 1289.7429 |
| 1293.7108 | 1307.5328 | 1310.9609 |
| 1316.5820 | 1320.0650 | 1325.3135 |
| 1333.6626 | 1339.7331 | 1350.4102 |

|           |           |           |
|-----------|-----------|-----------|
| 1358.6207 | 1363.6972 | 1365.4790 |
| 1374.3745 | 1377.5150 | 1380.5711 |
| 1383.6004 | 1388.5829 | 1390.8234 |
| 1399.9525 | 1409.2287 | 1417.2073 |
| 1419.0386 | 1422.4640 | 1428.0824 |
| 1437.8989 | 1463.3591 | 1466.4721 |
| 1473.6322 | 1475.4033 | 1476.5920 |
| 1480.5616 | 1487.3855 | 1491.6464 |
| 1492.1056 | 1492.3556 | 1495.6225 |
| 1496.5557 | 1496.9145 | 1498.3560 |
| 1502.9356 | 1504.3060 | 1505.0935 |
| 1516.0994 | 1516.7276 | 1526.0346 |
| 1529.5563 | 1530.4823 | 1533.2730 |
| 1535.4797 | 1540.9051 | 1547.8781 |
| 1563.8077 | 1575.0945 | 1639.7641 |
| 1663.8335 | 1673.6794 | 1681.6456 |
| 1688.4180 | 1693.4354 | 1696.1497 |
| 1702.9527 | 1708.4864 | 1790.6805 |
| 2397.7753 | 3036.1532 | 3067.3996 |
| 3069.7282 | 3070.5005 | 3071.5549 |
| 3072.1313 | 3075.3526 | 3075.4522 |
| 3081.1496 | 3083.5530 | 3092.8694 |
| 3096.0743 | 3107.0115 | 3137.7351 |
| 3143.4387 | 3144.7303 | 3144.8941 |
| 3147.9769 | 3149.9428 | 3153.1649 |
| 3154.3673 | 3162.2554 | 3164.1531 |
| 3164.9179 | 3165.4908 | 3167.0314 |
| 3167.6922 | 3177.0829 | 3188.5662 |
| 3190.5126 | 3190.8564 | 3196.3302 |
| 3198.8554 | 3202.7663 | 3206.9514 |
| 3208.3132 | 3210.2068 | 3214.7810 |
| 3219.5814 | 3220.9779 | 3226.1304 |
| 3226.4923 | 3231.2480 | 3234.9258 |

#### **TS5R<sup>d</sup>**

Zero-point correction= 0.792687

Thermal correction to Energy= 0.842684

Thermal correction to Enthalpy= 0.843628

Thermal correction to Gibbs Free Energy= 0.710353

Sum of electronic and zero-point Energies= -2725.338869

Sum of electronic and thermal Energies= -2725.288872

Sum of electronic and thermal Enthalpies= -2725.287928

Sum of electronic and thermal Free Energies= -2725.421203

Cartesian coordinates



|   |           |           |           |
|---|-----------|-----------|-----------|
| C | -0.464583 | -0.141044 | -0.878328 |
| C | 0.819097  | 0.312553  | -0.499213 |
| C | 1.538248  | -0.031057 | 0.642033  |
| O | -1.249975 | 0.458228  | -1.634013 |
| C | 3.017262  | -0.139356 | 0.673882  |
| C | 3.669995  | -0.638583 | 1.807956  |
| C | 3.770263  | 0.205083  | -0.453352 |
| C | 5.047711  | -0.810737 | 1.806446  |
| H | 3.094120  | -0.902031 | 2.691063  |
| C | 5.153094  | 0.053739  | -0.442376 |
| H | 3.278334  | 0.571594  | -1.348049 |
| C | 5.794863  | -0.463219 | 0.680612  |
| H | 5.540165  | -1.212014 | 2.685969  |
| H | 5.727732  | 0.324740  | -1.322626 |
| H | 6.872108  | -0.596320 | 0.679157  |
| C | 0.837054  | -0.767478 | 1.672851  |
| N | 0.259579  | -1.326329 | 2.508511  |
| H | 1.224920  | 1.098508  | -1.130747 |
| C | -0.877218 | -1.580470 | -0.622013 |
| C | -2.115836 | -3.372128 | -0.651242 |
| C | -3.408953 | -1.245457 | -0.443878 |
| H | -3.326031 | -0.364323 | -1.088550 |
| N | -0.890301 | -3.804309 | -0.767820 |
| N | -0.128722 | -2.681277 | -0.747371 |
| N | -2.152016 | -2.011078 | -0.559382 |
| C | -3.380844 | -4.172485 | -0.732332 |
| H | -3.291269 | -5.075114 | -0.126469 |
| H | -3.532745 | -4.465491 | -1.781246 |
| C | -4.596509 | -2.144560 | -0.857581 |
| O | -4.462110 | -3.423066 | -0.244070 |
| C | -5.170210 | -0.957095 | 1.106752  |
| C | -3.785922 | -0.845497 | 0.964854  |
| C | -2.986190 | -0.389454 | 1.997748  |
| C | -3.596744 | -0.059909 | 3.210023  |
| C | -4.978098 | -0.168049 | 3.359832  |
| C | -5.777799 | -0.612402 | 2.304909  |
| C | -5.786894 | -1.471305 | -0.173494 |
| H | -1.910148 | -0.299721 | 1.878773  |
| H | -5.436520 | 0.091192  | 4.308760  |
| H | -6.853384 | -0.698796 | 2.425794  |
| H | -6.150124 | -0.642143 | -0.790433 |
| H | -6.601723 | -2.182955 | -0.024638 |
| C | 1.296194  | -2.802900 | -0.961556 |
| C | 1.820665  | -2.364153 | -2.186156 |

|    |           |           |           |
|----|-----------|-----------|-----------|
| C  | 2.072807  | -3.401173 | 0.032127  |
| C  | 3.193008  | -2.493702 | -2.369949 |
| C  | 3.447408  | -3.489703 | -0.204252 |
| C  | 4.024040  | -3.042570 | -1.388168 |
| H  | 3.626788  | -2.154119 | -3.307509 |
| H  | 4.077233  | -3.927179 | 0.566759  |
| C  | 1.503217  | -3.989420 | 1.296983  |
| H  | 1.520837  | -5.081549 | 1.231426  |
| H  | 0.478164  | -3.678122 | 1.491122  |
| H  | 2.113944  | -3.694326 | 2.154273  |
| C  | 5.504178  | -3.177133 | -1.627515 |
| H  | 5.720225  | -4.085643 | -2.199132 |
| H  | 6.049275  | -3.233093 | -0.682871 |
| H  | 5.887606  | -2.326920 | -2.197074 |
| C  | 0.959011  | -1.769678 | -3.269925 |
| H  | 0.825665  | -0.691676 | -3.128233 |
| H  | -0.033356 | -2.227923 | -3.304917 |
| H  | 1.431337  | -1.917114 | -4.242401 |
| H  | -4.691588 | -2.249809 | -1.944969 |
| H  | -2.990083 | 0.280956  | 4.042917  |
| C  | 1.420818  | 2.022562  | 1.864209  |
| C  | 0.005230  | 2.169793  | 1.751000  |
| C  | 2.344626  | 2.665659  | 0.944005  |
| H  | 1.822734  | 1.811377  | 2.850329  |
| C  | -0.802163 | 2.005664  | 3.019372  |
| O  | -0.571750 | 2.363251  | 0.664330  |
| O  | 3.571518  | 2.783725  | 1.501770  |
| O  | 2.114858  | 3.043176  | -0.194493 |
| H  | -0.640600 | 1.007905  | 3.444621  |
| H  | -0.473689 | 2.733428  | 3.766766  |
| H  | -1.861171 | 2.148711  | 2.803736  |
| Li | -1.700779 | 2.260198  | -0.873134 |
| C  | 4.575763  | 3.392118  | 0.681967  |
| O  | -0.982764 | 3.619792  | -2.067179 |
| Cl | -3.975305 | 2.252494  | -0.877356 |
| C  | 5.886377  | 3.280024  | 1.428475  |
| H  | 4.612858  | 2.875280  | -0.281227 |
| H  | 4.298565  | 4.434579  | 0.492684  |
| C  | -0.451561 | 4.774335  | -1.406539 |
| C  | -1.921962 | 4.116756  | -3.029379 |
| H  | 6.126564  | 2.228715  | 1.606508  |
| H  | 6.691223  | 3.729478  | 0.842121  |
| H  | 5.828858  | 3.793860  | 2.391078  |
| C  | -1.681174 | 5.641463  | -1.151819 |

|   |           |          |           |
|---|-----------|----------|-----------|
| H | 0.076585  | 4.424079 | -0.519954 |
| H | 0.256720  | 5.274525 | -2.082249 |
| C | -2.567361 | 5.360242 | -2.385836 |
| H | -1.378231 | 4.376241 | -3.946219 |
| H | -2.634182 | 3.316245 | -3.233753 |
| H | -1.430039 | 6.697835 | -1.037619 |
| H | -2.182816 | 5.305834 | -0.239451 |
| H | -3.596782 | 5.152352 | -2.090444 |
| H | -2.569001 | 6.200413 | -3.083757 |

Vibrational frequencies

|           |          |          |
|-----------|----------|----------|
| -220.5920 | 22.8175  | 31.2934  |
| 37.2352   | 40.6874  | 45.3296  |
| 47.0562   | 53.3437  | 55.4575  |
| 61.8849   | 66.5806  | 71.9485  |
| 73.7000   | 78.1326  | 79.3617  |
| 85.3812   | 93.8189  | 97.4216  |
| 101.0273  | 107.8657 | 116.9807 |
| 121.7186  | 126.7830 | 128.4867 |
| 134.2944  | 138.4781 | 138.8728 |
| 143.2338  | 152.0713 | 155.4925 |
| 158.8352  | 162.1758 | 165.4197 |
| 171.2806  | 174.0933 | 181.2674 |
| 186.7284  | 192.5678 | 199.4278 |
| 206.1620  | 214.5331 | 218.9968 |
| 221.9099  | 241.7436 | 248.4645 |
| 250.9797  | 257.7297 | 270.0550 |
| 278.6582  | 287.0091 | 296.4485 |
| 307.9996  | 321.2670 | 323.0451 |
| 330.7807  | 346.8937 | 347.7100 |
| 354.7268  | 363.2609 | 368.1559 |
| 384.5550  | 400.6211 | 409.1401 |
| 410.3145  | 424.3678 | 426.1972 |
| 433.8560  | 448.7705 | 464.4350 |
| 477.5204  | 485.9924 | 498.5331 |
| 500.2132  | 503.5364 | 509.8096 |
| 523.7669  | 538.4747 | 554.7956 |
| 574.9245  | 581.5072 | 583.2050 |
| 587.1039  | 592.5176 | 599.5362 |
| 618.5582  | 626.2754 | 629.2999 |
| 635.5075  | 638.8295 | 654.5467 |
| 684.0238  | 685.0794 | 696.3061 |
| 702.0462  | 715.3696 | 725.7800 |
| 752.3576  | 753.0364 | 758.5208 |
| 763.6511  | 779.5885 | 784.4696 |

|           |           |           |
|-----------|-----------|-----------|
| 793.4788  | 804.3877  | 807.5166  |
| 817.5179  | 822.6090  | 830.4077  |
| 840.9470  | 853.2017  | 861.7006  |
| 871.8373  | 877.5878  | 880.1105  |
| 881.8202  | 894.1935  | 905.3907  |
| 915.2797  | 922.3851  | 930.6341  |
| 940.4567  | 956.8482  | 958.2035  |
| 967.8340  | 971.5360  | 972.0824  |
| 976.6140  | 979.8659  | 981.2452  |
| 996.0672  | 997.5244  | 998.3477  |
| 1015.5425 | 1018.9413 | 1022.3276 |
| 1023.7206 | 1039.8684 | 1042.4464 |
| 1043.0501 | 1050.9095 | 1053.2458 |
| 1053.7121 | 1060.3127 | 1060.6827 |
| 1063.0055 | 1065.1644 | 1066.1081 |
| 1066.8728 | 1074.3544 | 1078.5027 |
| 1115.6354 | 1125.4277 | 1128.3160 |
| 1129.4066 | 1140.3729 | 1155.1725 |
| 1156.7577 | 1178.3682 | 1181.3162 |
| 1183.7286 | 1186.4664 | 1192.1375 |
| 1198.7229 | 1205.2418 | 1212.4393 |
| 1218.7574 | 1224.6490 | 1233.5059 |
| 1253.2535 | 1254.9101 | 1260.7200 |
| 1262.7034 | 1270.5706 | 1278.9437 |
| 1283.7740 | 1285.3982 | 1292.9512 |
| 1303.2249 | 1307.3404 | 1310.4644 |
| 1315.7485 | 1318.2995 | 1320.8784 |
| 1331.7579 | 1334.9054 | 1339.3570 |
| 1348.8044 | 1362.1709 | 1363.3091 |
| 1372.9133 | 1374.6129 | 1380.2983 |
| 1380.3544 | 1382.5929 | 1391.7812 |
| 1402.1756 | 1408.0886 | 1411.9981 |
| 1420.6394 | 1422.8629 | 1431.8768 |
| 1438.2256 | 1460.0022 | 1465.3591 |
| 1467.1327 | 1476.6195 | 1479.3604 |
| 1483.6162 | 1490.6599 | 1491.8650 |
| 1492.2672 | 1494.9143 | 1495.6533 |
| 1497.3916 | 1501.9441 | 1503.6369 |
| 1505.7052 | 1506.4587 | 1510.9092 |
| 1515.8448 | 1518.2620 | 1519.0775 |
| 1521.8787 | 1529.0975 | 1532.3654 |
| 1534.4839 | 1536.7510 | 1545.3852 |
| 1561.8502 | 1568.6362 | 1632.0746 |
| 1664.4543 | 1671.4513 | 1684.2120 |

|           |           |           |
|-----------|-----------|-----------|
| 1687.2115 | 1691.6822 | 1693.2349 |
| 1697.1730 | 1713.4086 | 1787.0098 |
| 2398.8844 | 3054.6205 | 3063.7375 |
| 3064.6855 | 3068.4598 | 3068.8769 |
| 3073.7206 | 3076.2840 | 3080.2498 |
| 3088.8024 | 3089.7273 | 3092.7239 |
| 3105.6459 | 3114.8302 | 3137.0028 |
| 3140.9213 | 3141.7762 | 3142.2465 |
| 3143.2777 | 3147.5857 | 3150.3476 |
| 3154.2842 | 3161.1433 | 3163.3812 |
| 3165.8108 | 3167.1499 | 3172.2352 |
| 3174.6403 | 3175.2947 | 3190.7586 |
| 3191.5626 | 3196.0312 | 3196.2631 |
| 3200.3364 | 3202.5398 | 3203.2997 |
| 3206.6865 | 3212.9362 | 3216.6095 |
| 3217.7230 | 3223.1262 | 3223.5699 |
| 3228.3461 | 3230.7970 | 3238.5768 |

### **TSSR<sup>c</sup>**

Zero-point correction= 0.790961

Thermal correction to Energy= 0.842110

Thermal correction to Enthalpy= 0.843054

Thermal correction to Gibbs Free Energy= 0.704093

Sum of electronic and zero-point Energies= -2725.330570

Sum of electronic and thermal Energies= -2725.279421

Sum of electronic and thermal Enthalpies= -2725.278477

Sum of electronic and thermal Free Energies= -2725.417438

Cartesian coordinates

|   |           |           |           |
|---|-----------|-----------|-----------|
| C | -0.265983 | 0.059189  | -0.690037 |
| C | 0.961565  | 0.544266  | -0.181068 |
| C | 1.759591  | -0.006367 | 0.815752  |
| O | -1.145907 | 0.768770  | -1.203042 |
| C | 3.228507  | 0.196682  | 0.879249  |
| C | 4.021649  | -0.644087 | 1.669693  |
| C | 3.845854  | 1.180084  | 0.097768  |
| C | 5.404615  | -0.505313 | 1.677443  |
| H | 3.555627  | -1.426980 | 2.262473  |
| C | 5.228016  | 1.324432  | 0.118328  |
| H | 3.252508  | 1.829876  | -0.535579 |
| C | 6.012191  | 0.481858  | 0.904766  |
| H | 6.007638  | -1.170534 | 2.286476  |
| H | 5.695130  | 2.092032  | -0.490200 |
| H | 7.091784  | 0.590910  | 0.909753  |
| C | 1.242485  | -1.182679 | 1.480531  |

|   |           |           |           |
|---|-----------|-----------|-----------|
| N | 0.786193  | -2.098233 | 2.025355  |
| H | 1.223073  | 1.526498  | -0.563359 |
| C | -0.496703 | -1.422354 | -0.912775 |
| C | -1.515658 | -3.259129 | -1.480718 |
| C | -3.043764 | -1.450371 | -0.666821 |
| H | -3.091696 | -0.436257 | -1.077365 |
| N | -0.253532 | -3.480086 | -1.729482 |
| N | 0.370404  | -2.329303 | -1.375392 |
| N | -1.709111 | -2.001564 | -0.986029 |
| C | -2.681078 | -4.158370 | -1.764086 |
| H | -2.446523 | -5.178573 | -1.457584 |
| H | -2.871909 | -4.149403 | -2.846921 |
| C | -4.133026 | -2.363072 | -1.276379 |
| O | -3.802985 | -3.727700 | -1.039237 |
| C | -4.749230 | -1.772453 | 0.936775  |
| C | -3.399753 | -1.442749 | 0.801600  |
| C | -2.621914 | -1.101575 | 1.894771  |
| C | -3.217045 | -1.114086 | 3.157941  |
| C | -4.561913 | -1.451190 | 3.302622  |
| C | -5.341535 | -1.778699 | 2.191083  |
| C | -5.359693 | -2.057791 | -0.415737 |
| H | -1.576103 | -0.824498 | 1.802365  |
| H | -5.010080 | -1.457321 | 4.291414  |
| H | -6.389893 | -2.037078 | 2.307368  |
| H | -5.873050 | -1.171024 | -0.803723 |
| H | -6.057484 | -2.898095 | -0.427359 |
| C | 1.791998  | -2.187132 | -1.583494 |
| C | 2.243418  | -1.233106 | -2.505164 |
| C | 2.653524  | -3.013111 | -0.853525 |
| C | 3.620963  | -1.057322 | -2.611549 |
| C | 4.022711  | -2.787482 | -1.002524 |
| C | 4.524183  | -1.806806 | -1.855840 |
| H | 3.997631  | -0.311363 | -3.307503 |
| H | 4.712998  | -3.395647 | -0.423108 |
| C | 2.169612  | -4.138895 | 0.022465  |
| H | 2.103204  | -5.060466 | -0.564328 |
| H | 1.188599  | -3.946540 | 0.455111  |
| H | 2.876152  | -4.305677 | 0.838131  |
| C | 6.006995  | -1.585056 | -1.993409 |
| H | 6.538333  | -1.929244 | -1.103425 |
| H | 6.229771  | -0.524977 | -2.136811 |
| H | 6.400109  | -2.131345 | -2.857111 |
| C | 1.318377  | -0.409837 | -3.365977 |
| H | 1.149441  | 0.581498  | -2.932596 |

|    |           |           |           |
|----|-----------|-----------|-----------|
| H  | 0.344631  | -0.883586 | -3.511861 |
| H  | 1.769061  | -0.264685 | -4.349660 |
| H  | -4.276809 | -2.190466 | -2.350092 |
| H  | -2.612600 | -0.844531 | 4.015747  |
| C  | 1.321143  | 1.412672  | 2.725281  |
| C  | 0.572657  | 0.567507  | 3.631692  |
| C  | 0.713567  | 2.384543  | 1.864270  |
| H  | 2.360471  | 1.599573  | 2.968732  |
| C  | 1.404553  | -0.184103 | 4.656064  |
| O  | -0.647471 | 0.423847  | 3.607738  |
| O  | 1.624880  | 3.275801  | 1.415012  |
| O  | -0.445403 | 2.398076  | 1.443477  |
| H  | 2.381833  | -0.465495 | 4.253961  |
| H  | 1.576926  | 0.461725  | 5.523677  |
| H  | 0.862445  | -1.073404 | 4.979110  |
| Li | -1.780749 | 2.288352  | -0.012206 |
| C  | 1.145723  | 4.316226  | 0.550338  |
| O  | -1.377643 | 3.703926  | -1.317201 |
| Cl | -4.047384 | 1.996583  | -0.267509 |
| C  | 2.322138  | 5.218664  | 0.248680  |
| H  | 0.718438  | 3.878003  | -0.356564 |
| H  | 0.341122  | 4.856510  | 1.061269  |
| C  | -1.936005 | 4.990389  | -0.994966 |
| C  | -1.713526 | 3.345376  | -2.673165 |
| H  | 3.119457  | 4.659930  | -0.248295 |
| H  | 2.006399  | 6.031673  | -0.409566 |
| H  | 2.723986  | 5.650715  | 1.167859  |
| C  | -2.907781 | 5.308933  | -2.124355 |
| H  | -2.416066 | 4.925565  | -0.014253 |
| H  | -1.119224 | 5.722603  | -0.947489 |
| C  | -2.226132 | 4.629392  | -3.313955 |
| H  | -0.816435 | 2.937583  | -3.145912 |
| H  | -2.490512 | 2.574489  | -2.638082 |
| H  | -3.055697 | 6.382169  | -2.256953 |
| H  | -3.873158 | 4.835472  | -1.924783 |
| H  | -2.902633 | 4.433494  | -4.147720 |
| H  | -1.392346 | 5.239978  | -3.675518 |

Vibrational frequencies

|           |         |         |
|-----------|---------|---------|
| -188.9633 | 11.9499 | 22.4359 |
| 27.7517   | 33.0084 | 34.5513 |
| 39.8478   | 44.6373 | 47.5238 |
| 52.2868   | 56.6983 | 61.5580 |
| 62.1432   | 72.9457 | 74.2354 |
| 77.5844   | 82.5990 | 83.5707 |

|           |           |           |
|-----------|-----------|-----------|
| 92.0215   | 94.9399   | 96.5891   |
| 97.9053   | 104.4223  | 116.4523  |
| 117.7403  | 122.7628  | 125.3935  |
| 131.0494  | 139.2981  | 141.5521  |
| 148.0747  | 150.4834  | 153.8503  |
| 162.7189  | 174.0675  | 180.4673  |
| 186.2623  | 189.7482  | 193.3404  |
| 200.8643  | 210.3427  | 216.3768  |
| 226.4666  | 228.7707  | 238.9155  |
| 242.8136  | 245.4325  | 261.5113  |
| 273.3568  | 280.9121  | 282.0577  |
| 292.9507  | 299.1229  | 316.1701  |
| 325.7950  | 332.2662  | 336.0667  |
| 341.2215  | 349.9983  | 357.4926  |
| 376.0003  | 395.8492  | 399.6380  |
| 405.6302  | 409.4322  | 419.2306  |
| 421.1694  | 427.4694  | 449.5643  |
| 472.7564  | 476.2233  | 479.6173  |
| 495.9053  | 499.8637  | 504.8466  |
| 523.1677  | 539.2445  | 556.3847  |
| 570.9275  | 575.7618  | 576.9142  |
| 582.9586  | 588.3630  | 590.5330  |
| 599.0085  | 614.0782  | 626.6918  |
| 632.6589  | 638.9717  | 654.0173  |
| 683.3925  | 687.5597  | 691.6056  |
| 705.1673  | 713.4384  | 722.5889  |
| 752.1163  | 753.0003  | 762.2188  |
| 765.7184  | 779.2757  | 780.6926  |
| 786.5342  | 807.8073  | 821.0607  |
| 822.7264  | 825.6705  | 841.9694  |
| 862.5660  | 865.6552  | 866.5360  |
| 869.3166  | 875.5701  | 888.3798  |
| 889.9356  | 894.0737  | 897.2682  |
| 917.8074  | 923.6665  | 933.7496  |
| 938.4693  | 944.0250  | 952.0230  |
| 960.6686  | 964.0457  | 968.5150  |
| 976.8990  | 983.6990  | 984.3333  |
| 990.2181  | 996.6568  | 998.5572  |
| 1020.4246 | 1022.4583 | 1026.5258 |
| 1032.3778 | 1038.2999 | 1040.7434 |
| 1041.6916 | 1048.1848 | 1052.9226 |
| 1054.7692 | 1055.6856 | 1058.4963 |
| 1060.7877 | 1063.0492 | 1065.2385 |
| 1066.2611 | 1073.6984 | 1078.1289 |



|           |           |           |
|-----------|-----------|-----------|
| 1117.6729 | 1125.8922 | 1126.6954 |
| 1129.9110 | 1144.8112 | 1152.5292 |
| 1175.1728 | 1176.8315 | 1181.0934 |
| 1182.4597 | 1184.1320 | 1192.3726 |
| 1203.1177 | 1207.9889 | 1209.2314 |
| 1214.1649 | 1215.0191 | 1217.2971 |
| 1232.8534 | 1251.7874 | 1255.6805 |
| 1266.6646 | 1277.1166 | 1277.7932 |
| 1285.0052 | 1285.2916 | 1286.6703 |
| 1296.8539 | 1311.2314 | 1312.1145 |
| 1313.2441 | 1319.8588 | 1325.9705 |
| 1334.2406 | 1342.8652 | 1346.6303 |
| 1358.8695 | 1361.4284 | 1363.0333 |
| 1368.7446 | 1376.8823 | 1382.8657 |
| 1383.4163 | 1386.5435 | 1389.2628 |
| 1402.1663 | 1410.6923 | 1418.6514 |
| 1418.9461 | 1420.4025 | 1429.3995 |
| 1437.6345 | 1458.0609 | 1465.2713 |
| 1466.2942 | 1472.9983 | 1473.7889 |
| 1479.6928 | 1488.2976 | 1490.4088 |
| 1490.8409 | 1491.2408 | 1493.3966 |
| 1498.5584 | 1501.7115 | 1502.9345 |
| 1504.7850 | 1506.0002 | 1506.8360 |
| 1516.7991 | 1517.8879 | 1523.2821 |
| 1527.4461 | 1532.8705 | 1534.9755 |
| 1540.4602 | 1544.7740 | 1546.4288 |
| 1563.2509 | 1570.3127 | 1648.1934 |
| 1665.7027 | 1671.7988 | 1686.2906 |
| 1687.1626 | 1692.0119 | 1693.0002 |
| 1702.5296 | 1709.5035 | 1781.1726 |
| 2392.4402 | 3055.4913 | 3060.2293 |
| 3066.8290 | 3068.5388 | 3077.6517 |
| 3081.6074 | 3083.4171 | 3085.3077 |
| 3086.0695 | 3089.5867 | 3094.0457 |
| 3098.5468 | 3103.2219 | 3130.5445 |
| 3138.0657 | 3139.9931 | 3142.3517 |
| 3143.1061 | 3146.5835 | 3148.2015 |
| 3153.6118 | 3157.4032 | 3157.9726 |
| 3159.8730 | 3168.0235 | 3168.1195 |
| 3170.4395 | 3171.5921 | 3176.6270 |
| 3183.8574 | 3194.4079 | 3196.9345 |
| 3200.6350 | 3202.1634 | 3204.0997 |
| 3204.1634 | 3209.2461 | 3209.4343 |
| 3214.8066 | 3222.8948 | 3238.3343 |

3239.9748

3246.3247

3263.4615

**TS5R<sup>f</sup>**

Zero-point correction= 0.792568

Thermal correction to Energy= 0.842889

Thermal correction to Enthalpy= 0.843833

Thermal correction to Gibbs Free Energy= 0.709144

Sum of electronic and zero-point Energies= -2725.337135

Sum of electronic and thermal Energies= -2725.286814

Sum of electronic and thermal Enthalpies= -2725.285870

Sum of electronic and thermal Free Energies= -2725.420559

## Cartesian coordinates

|   |           |           |           |
|---|-----------|-----------|-----------|
| C | -0.073597 | -0.148251 | -0.970034 |
| C | 1.065303  | 0.547338  | -0.503909 |
| C | 1.700850  | 0.416859  | 0.732117  |
| O | -0.895786 | 0.287909  | -1.792942 |
| C | 3.159113  | 0.635108  | 0.912793  |
| C | 3.791552  | 0.237020  | 2.097492  |
| C | 3.927342  | 1.181307  | -0.119946 |
| C | 5.166543  | 0.371226  | 2.240796  |
| H | 3.205909  | -0.196285 | 2.904775  |
| C | 5.301348  | 1.330859  | 0.033962  |
| H | 3.463014  | 1.468954  | -1.056785 |
| C | 5.926383  | 0.921317  | 1.209300  |
| H | 5.645051  | 0.046610  | 3.158872  |
| H | 5.886252  | 1.756608  | -0.775167 |
| H | 7.000605  | 1.027938  | 1.320668  |
| C | 1.061355  | -0.462079 | 1.689058  |
| N | 0.509758  | -1.147722 | 2.443465  |
| H | 1.393998  | 1.343350  | -1.165362 |
| C | -0.211100 | -1.629832 | -0.682712 |
| C | -1.037959 | -3.641470 | -0.604393 |
| C | -2.758739 | -1.829101 | -0.780050 |
| H | -2.761176 | -1.104300 | -1.599154 |
| N | 0.255883  | -3.805359 | -0.600112 |
| N | 0.760588  | -2.547652 | -0.652630 |
| N | -1.367823 | -2.317501 | -0.666879 |
| C | -2.097470 | -4.699196 | -0.633330 |
| H | -1.858025 | -5.484279 | 0.084998  |
| H | -2.130403 | -5.137492 | -1.640859 |
| C | -3.697041 | -3.026235 | -1.082523 |
| O | -3.332798 | -4.136873 | -0.273620 |
| C | -4.678025 | -1.667676 | 0.598020  |
| C | -3.349417 | -1.250349 | 0.486942  |

|    |           |           |           |
|----|-----------|-----------|-----------|
| C  | -2.778754 | -0.395154 | 1.416581  |
| C  | -3.554669 | 0.009906  | 2.504240  |
| C  | -4.876128 | -0.419003 | 2.632232  |
| C  | -5.453878 | -1.251991 | 1.671823  |
| C  | -5.056550 | -2.552061 | -0.567131 |
| H  | -1.760794 | -0.028154 | 1.328474  |
| H  | -5.464502 | -0.097994 | 3.486300  |
| H  | -6.484324 | -1.580141 | 1.769329  |
| H  | -5.577059 | -1.982728 | -1.345701 |
| H  | -5.679325 | -3.406950 | -0.295138 |
| C  | 2.189810  | -2.367012 | -0.782106 |
| C  | 2.680869  | -1.852451 | -1.992526 |
| C  | 3.017000  | -2.743585 | 0.277293  |
| C  | 4.052947  | -1.649879 | -2.085494 |
| C  | 4.387299  | -2.509365 | 0.126001  |
| C  | 4.920518  | -1.955137 | -1.031592 |
| H  | 4.457416  | -1.244625 | -3.009834 |
| H  | 5.047838  | -2.769182 | 0.949795  |
| C  | 2.526439  | -3.414662 | 1.534154  |
| H  | 2.851671  | -4.459335 | 1.538006  |
| H  | 1.443549  | -3.396057 | 1.637699  |
| H  | 2.960359  | -2.925853 | 2.410800  |
| C  | 6.401890  | -1.726926 | -1.171189 |
| H  | 6.869130  | -2.551955 | -1.718658 |
| H  | 6.879659  | -1.654032 | -0.191901 |
| H  | 6.605056  | -0.805048 | -1.721817 |
| C  | 1.786209  | -1.533274 | -3.162876 |
| H  | 1.384039  | -0.516912 | -3.101596 |
| H  | 0.941367  | -2.224385 | -3.234236 |
| H  | 2.355227  | -1.603206 | -4.091224 |
| H  | -3.686489 | -3.308374 | -2.142242 |
| H  | -3.107197 | 0.671808  | 3.237305  |
| C  | 1.078921  | 2.374640  | 1.920243  |
| C  | 0.113395  | 1.923999  | 2.903514  |
| C  | 0.695221  | 2.999891  | 0.686126  |
| H  | 2.071733  | 2.621193  | 2.277233  |
| C  | 0.675361  | 1.579506  | 4.269881  |
| O  | -1.090787 | 1.797468  | 2.690128  |
| O  | 1.733612  | 3.629984  | 0.103012  |
| O  | -0.390714 | 2.897007  | 0.114546  |
| H  | 1.720197  | 1.264087  | 4.215529  |
| H  | 0.626129  | 2.467649  | 4.908775  |
| H  | 0.069610  | 0.791218  | 4.718728  |
| Li | -1.335153 | 2.256324  | -1.466850 |

|    |           |          |           |
|----|-----------|----------|-----------|
| C  | 1.476529  | 4.267083 | -1.160165 |
| O  | -3.029913 | 1.882132 | -0.663564 |
| Cl | -1.450961 | 3.449560 | -3.381673 |
| C  | 2.779341  | 4.884511 | -1.616658 |
| H  | 1.098009  | 3.531097 | -1.876754 |
| H  | 0.690055  | 5.016177 | -1.026472 |
| C  | -4.152534 | 1.530229 | -1.484353 |
| C  | -3.437997 | 2.786805 | 0.383436  |
| H  | 3.551234  | 4.117780 | -1.723452 |
| H  | 2.637273  | 5.371950 | -2.583479 |
| H  | 3.128390  | 5.629024 | -0.897597 |
| C  | -5.276548 | 2.472362 | -1.066543 |
| H  | -3.857255 | 1.627185 | -2.532878 |
| H  | -4.422991 | 0.487106 | -1.271368 |
| C  | -4.956001 | 2.682645 | 0.415503  |
| H  | -2.928148 | 2.484485 | 1.300184  |
| H  | -3.115777 | 3.800281 | 0.110594  |
| H  | -6.264901 | 2.045583 | -1.247589 |
| H  | -5.197017 | 3.419210 | -1.610285 |
| H  | -5.426190 | 3.570853 | 0.841953  |
| H  | -5.257921 | 1.804761 | 0.997277  |

Vibrational frequencies

|           |          |          |
|-----------|----------|----------|
| -190.0927 | 23.8096  | 26.7424  |
| 31.4098   | 38.4241  | 42.2293  |
| 44.7631   | 51.0263  | 57.4426  |
| 60.2475   | 66.4147  | 70.8362  |
| 76.8526   | 81.4044  | 83.3897  |
| 85.3937   | 88.5527  | 92.0259  |
| 99.2046   | 104.4946 | 111.5031 |
| 114.3200  | 118.4477 | 120.4857 |
| 125.1825  | 132.2511 | 133.6250 |
| 137.1427  | 141.9022 | 147.0691 |
| 147.5142  | 150.8691 | 154.8131 |
| 161.9841  | 163.9000 | 169.0690 |
| 183.0896  | 188.5534 | 190.6670 |
| 207.4713  | 213.8076 | 215.6370 |
| 219.3778  | 236.9065 | 248.2439 |
| 252.3863  | 262.6224 | 271.0341 |
| 279.4331  | 285.3257 | 290.3611 |
| 299.3149  | 309.0706 | 327.3423 |
| 331.7184  | 339.6275 | 342.8591 |
| 350.6820  | 363.3942 | 375.9058 |
| 388.6795  | 401.7055 | 412.7252 |
| 417.0818  | 428.0022 | 430.4274 |

|           |           |           |
|-----------|-----------|-----------|
| 441.9445  | 455.4236  | 471.6505  |
| 475.2962  | 482.7368  | 493.0516  |
| 499.9570  | 503.1174  | 507.7472  |
| 528.9919  | 539.3357  | 557.2804  |
| 571.9733  | 574.0019  | 575.1403  |
| 583.8113  | 585.9072  | 592.6589  |
| 600.4147  | 619.1140  | 626.1686  |
| 633.0937  | 640.5496  | 653.6755  |
| 683.5600  | 693.7170  | 696.7833  |
| 706.0058  | 712.2990  | 726.9551  |
| 753.0772  | 754.7068  | 765.9336  |
| 774.5428  | 782.7936  | 784.8223  |
| 792.4265  | 811.0827  | 825.6079  |
| 828.3578  | 832.7415  | 845.2137  |
| 861.7759  | 862.5305  | 868.8634  |
| 874.1259  | 881.4389  | 889.3924  |
| 896.2978  | 899.4391  | 900.0972  |
| 923.4271  | 926.8647  | 932.2042  |
| 942.9371  | 944.6058  | 950.9600  |
| 960.8406  | 968.5844  | 970.3323  |
| 971.1857  | 976.3094  | 989.6727  |
| 995.1232  | 998.0539  | 1001.3422 |
| 1021.9721 | 1025.0603 | 1025.6506 |
| 1037.8428 | 1038.6118 | 1041.4882 |
| 1045.9660 | 1049.3073 | 1051.7344 |
| 1053.1543 | 1057.2997 | 1060.8404 |
| 1061.3464 | 1062.8402 | 1065.4699 |
| 1065.6760 | 1072.0502 | 1081.9300 |
| 1119.2737 | 1123.2803 | 1124.8602 |
| 1129.4616 | 1145.3284 | 1153.0434 |
| 1174.3125 | 1177.6843 | 1179.2649 |
| 1183.4291 | 1185.0604 | 1192.4868 |
| 1197.2478 | 1206.1302 | 1207.8959 |
| 1210.5605 | 1211.5058 | 1216.3164 |
| 1234.9350 | 1253.2522 | 1257.5256 |
| 1267.2298 | 1273.2954 | 1277.2057 |
| 1280.9751 | 1283.9733 | 1286.1600 |
| 1294.0997 | 1308.0362 | 1315.7828 |
| 1316.2363 | 1322.6042 | 1324.6565 |
| 1332.9788 | 1338.6213 | 1351.4094 |
| 1356.1104 | 1360.4577 | 1365.7863 |
| 1366.9371 | 1375.6762 | 1381.0237 |
| 1381.5893 | 1383.2071 | 1391.3842 |
| 1408.8520 | 1410.2724 | 1412.8070 |

|           |           |           |
|-----------|-----------|-----------|
| 1421.1073 | 1423.1490 | 1432.1818 |
| 1443.2870 | 1457.9577 | 1466.8369 |
| 1472.5380 | 1479.1222 | 1479.4959 |
| 1480.1409 | 1489.7600 | 1490.8018 |
| 1494.4717 | 1495.0661 | 1495.3179 |
| 1496.4584 | 1497.7763 | 1500.4522 |
| 1501.6018 | 1503.3556 | 1506.9159 |
| 1516.9878 | 1517.3025 | 1517.6913 |
| 1524.3272 | 1532.3701 | 1534.3465 |
| 1536.6008 | 1537.5284 | 1540.9261 |
| 1557.9123 | 1568.1234 | 1655.7292 |
| 1670.6682 | 1673.7879 | 1682.0761 |
| 1688.0658 | 1689.3336 | 1695.1330 |
| 1703.3693 | 1712.2080 | 1782.4834 |
| 2390.0394 | 3060.8162 | 3067.1466 |
| 3068.9397 | 3071.1571 | 3073.9754 |
| 3077.7687 | 3079.9176 | 3082.7902 |
| 3086.3394 | 3088.7441 | 3095.3392 |
| 3096.9553 | 3108.7865 | 3135.2044 |
| 3139.6414 | 3141.4617 | 3143.7069 |
| 3145.5273 | 3148.4776 | 3152.4109 |
| 3154.6797 | 3158.5929 | 3162.7175 |
| 3167.6208 | 3168.0977 | 3169.2051 |
| 3173.5524 | 3175.2233 | 3177.4759 |
| 3183.7665 | 3194.2718 | 3195.5619 |
| 3200.8840 | 3203.5033 | 3205.6272 |
| 3208.1500 | 3208.2473 | 3217.5091 |
| 3224.2105 | 3226.7330 | 3230.5636 |
| 3233.1510 | 3233.6132 | 3247.4730 |

## TS5S

Zero-point correction= 0.792878

Thermal correction to Energy= 0.843117

Thermal correction to Enthalpy= 0.844061

Thermal correction to Gibbs Free Energy= 0.708838

Sum of electronic and zero-point Energies= -2725.336637

Sum of electronic and thermal Energies= -2725.286399

Sum of electronic and thermal Enthalpies= -2725.285455

Sum of electronic and thermal Free Energies= -2725.420678

Cartesian coordinates

|   |           |           |           |
|---|-----------|-----------|-----------|
| C | -0.495266 | 0.259621  | 0.946298  |
| C | 0.418167  | -0.510792 | 0.192915  |
| C | 0.541144  | -0.687314 | -1.189282 |
| O | -0.453398 | 0.395031  | 2.173142  |

|   |           |           |           |
|---|-----------|-----------|-----------|
| C | 0.985599  | -1.998811 | -1.764508 |
| C | 0.926198  | -2.222192 | -3.144818 |
| C | 1.449649  | -3.021237 | -0.930372 |
| C | 1.323993  | -3.441327 | -3.680707 |
| H | 0.568541  | -1.437507 | -3.805587 |
| C | 1.860693  | -4.235708 | -1.471584 |
| H | 1.477272  | -2.884941 | 0.144968  |
| C | 1.797235  | -4.452234 | -2.845970 |
| H | 1.267412  | -3.599612 | -4.752451 |
| H | 2.219573  | -5.018972 | -0.811789 |
| H | 2.111394  | -5.403255 | -3.263642 |
| C | -0.374200 | 0.045048  | -2.042295 |
| N | -1.097877 | 0.608881  | -2.749051 |
| H | 1.138355  | -1.006925 | 0.835903  |
| C | -1.870538 | 0.747003  | 0.441671  |
| C | -4.051042 | 0.818601  | 0.623804  |
| C | -3.010596 | -1.307958 | 1.417536  |
| H | -2.195139 | -1.336252 | 2.148040  |
| N | -3.705849 | 1.991628  | 0.186842  |
| N | -2.345427 | 1.937179  | 0.072448  |
| N | -2.955524 | 0.018919  | 0.787098  |
| C | -5.413690 | 0.350284  | 1.041718  |
| H | -6.144033 | 0.572521  | 0.262589  |
| H | -5.697722 | 0.887323  | 1.957296  |
| C | -4.377724 | -1.477799 | 2.123028  |
| O | -5.405255 | -1.041397 | 1.243194  |
| C | -3.813416 | -3.496092 | 1.010946  |
| C | -2.975770 | -2.506920 | 0.490990  |
| C | -2.248204 | -2.720799 | -0.668766 |
| C | -2.343427 | -3.960428 | -1.301611 |
| C | -3.162468 | -4.958545 | -0.775128 |
| C | -3.908882 | -4.730397 | 0.382625  |
| C | -4.523734 | -2.995114 | 2.247693  |
| H | -1.627985 | -1.941222 | -1.090911 |
| H | -3.231390 | -5.918147 | -1.277218 |
| H | -4.563814 | -5.501126 | 0.777378  |
| H | -4.032196 | -3.346249 | 3.161439  |
| H | -5.577889 | -3.276599 | 2.294789  |
| C | -1.680342 | 3.111919  | -0.442665 |
| C | -0.761400 | 3.801981  | 0.355771  |
| C | -2.108887 | 3.582746  | -1.695550 |
| C | -0.204216 | 4.965548  | -0.180045 |
| C | -1.519135 | 4.751362  | -2.170577 |
| C | -0.558115 | 5.448628  | -1.436032 |

|    |           |           |           |
|----|-----------|-----------|-----------|
| H  | 0.518117  | 5.513216  | 0.419961  |
| H  | -1.827997 | 5.129608  | -3.141827 |
| C  | -3.195870 | 2.923484  | -2.505408 |
| H  | -4.175993 | 3.290714  | -2.188002 |
| H  | -3.190668 | 1.839218  | -2.402431 |
| H  | -3.062235 | 3.164234  | -3.561674 |
| C  | 0.096618  | 6.680640  | -2.001210 |
| H  | -0.585702 | 7.228167  | -2.655163 |
| H  | 0.974169  | 6.403898  | -2.595459 |
| H  | 0.433490  | 7.349835  | -1.206769 |
| C  | -0.386433 | 3.387239  | 1.752450  |
| H  | 0.511122  | 2.763361  | 1.733847  |
| H  | -1.178595 | 2.824730  | 2.248903  |
| H  | -0.165825 | 4.277098  | 2.345148  |
| H  | -4.430472 | -0.935068 | 3.074715  |
| H  | -1.774661 | -4.141114 | -2.208834 |
| C  | 1.459940  | 2.802329  | -2.266180 |
| C  | 1.933537  | 1.746653  | -1.299999 |
| H  | 1.790516  | 2.602802  | -3.286172 |
| H  | 0.365694  | 2.836982  | -2.252364 |
| H  | 1.826670  | 3.776047  | -1.935106 |
| C  | 2.335977  | 0.475105  | -1.836694 |
| C  | 3.291506  | -0.353714 | -1.122690 |
| H  | 2.354437  | 0.364163  | -2.915456 |
| O  | 3.914802  | -1.222103 | -1.925383 |
| O  | 1.879462  | 1.964519  | -0.077069 |
| O  | 3.510338  | -0.326625 | 0.086533  |
| C  | 4.831506  | -2.127774 | -1.287379 |
| C  | 5.358111  | -3.053824 | -2.359662 |
| H  | 5.628088  | -1.547003 | -0.813546 |
| H  | 4.296103  | -2.671973 | -0.503205 |
| H  | 6.053240  | -3.772189 | -1.919369 |
| H  | 4.533726  | -3.601279 | -2.823022 |
| H  | 5.884886  | -2.489924 | -3.132752 |
| Li | 2.809748  | 0.988906  | 1.325125  |
| Cl | 4.242042  | 2.403343  | 2.391967  |
| O  | 2.437846  | -0.389965 | 2.711098  |
| C  | 1.955283  | 0.115021  | 3.970856  |
| C  | 3.610615  | -1.199145 | 2.921584  |
| C  | 3.074207  | -0.147575 | 4.969886  |
| H  | 1.718637  | 1.174478  | 3.845161  |
| H  | 1.038647  | -0.424545 | 4.231547  |
| C  | 3.670963  | -1.447302 | 4.424455  |
| H  | 3.509436  | -2.108354 | 2.322464  |



|   |          |           |          |
|---|----------|-----------|----------|
| H | 4.486642 | -0.639148 | 2.575091 |
| H | 2.706517 | -0.231758 | 5.994524 |
| H | 3.812263 | 0.658022  | 4.916195 |
| H | 4.688144 | -1.639369 | 4.770794 |
| H | 3.042144 | -2.300623 | 4.699170 |

Vibrational frequencies

|           |          |          |
|-----------|----------|----------|
| -257.3689 | 20.8982  | 22.7925  |
| 28.4458   | 35.5902  | 40.5897  |
| 46.1484   | 49.6577  | 51.1748  |
| 57.2987   | 60.7454  | 68.5157  |
| 72.7945   | 75.9178  | 84.8621  |
| 86.1695   | 89.5097  | 93.1695  |
| 95.4909   | 100.5760 | 104.4316 |
| 111.4669  | 114.2997 | 117.9821 |
| 120.8059  | 124.8697 | 131.7459 |
| 136.4170  | 143.7097 | 145.6382 |
| 152.2509  | 161.6926 | 166.4257 |
| 170.6418  | 175.8955 | 183.4595 |
| 196.2195  | 201.1970 | 204.7283 |
| 208.5731  | 219.9932 | 228.9683 |
| 231.2362  | 244.8878 | 259.5447 |
| 266.3667  | 275.3474 | 277.6821 |
| 282.1325  | 285.4935 | 286.6791 |
| 292.5824  | 302.8881 | 320.6829 |
| 325.2483  | 333.7062 | 348.8753 |
| 354.4817  | 363.9059 | 372.3836 |
| 393.4968  | 402.0959 | 405.8686 |
| 411.6531  | 416.7592 | 430.4898 |
| 433.9883  | 459.0745 | 466.8288 |
| 473.7368  | 486.3994 | 490.2677 |
| 496.3275  | 504.8421 | 515.7609 |
| 521.4978  | 529.2033 | 555.7324 |
| 574.8010  | 575.2264 | 580.8486 |
| 587.8241  | 588.5098 | 594.3177 |
| 607.9057  | 609.3161 | 627.8144 |
| 639.5192  | 643.4335 | 654.1147 |
| 679.7832  | 681.7523 | 704.3372 |
| 705.5778  | 710.7945 | 724.1282 |
| 747.5239  | 751.4958 | 761.9379 |
| 771.2452  | 786.8388 | 789.9668 |
| 791.5924  | 808.9917 | 814.5266 |
| 827.4202  | 840.8988 | 857.7605 |
| 860.1192  | 868.7111 | 871.9457 |
| 875.5610  | 883.3582 | 892.5422 |

|           |           |           |
|-----------|-----------|-----------|
| 893.6710  | 895.7395  | 904.3696  |
| 917.1654  | 918.0032  | 927.0125  |
| 938.7673  | 948.0357  | 952.1583  |
| 955.1862  | 971.4458  | 975.8081  |
| 977.6245  | 979.1071  | 983.5127  |
| 994.5913  | 1001.4809 | 1012.5858 |
| 1019.1389 | 1021.2219 | 1022.0150 |
| 1026.5734 | 1039.0054 | 1044.6062 |
| 1045.9329 | 1052.4007 | 1054.5312 |
| 1054.9930 | 1056.1448 | 1062.9155 |
| 1063.6729 | 1063.7150 | 1067.0250 |
| 1069.9020 | 1077.4205 | 1079.1423 |
| 1114.3729 | 1115.5376 | 1127.5877 |
| 1128.0930 | 1131.2772 | 1154.9194 |
| 1173.2251 | 1174.2745 | 1180.7215 |
| 1181.1707 | 1182.5675 | 1189.8464 |
| 1201.1158 | 1205.2458 | 1208.6021 |
| 1210.4951 | 1217.0834 | 1221.9972 |
| 1234.0433 | 1254.7574 | 1260.7457 |
| 1270.5805 | 1271.7649 | 1273.1173 |
| 1280.2211 | 1284.7337 | 1290.2773 |
| 1297.5802 | 1307.0511 | 1308.4293 |
| 1311.7991 | 1320.5405 | 1322.8327 |
| 1334.0699 | 1340.6884 | 1343.2845 |
| 1360.0708 | 1361.0079 | 1362.7961 |
| 1372.8814 | 1377.6547 | 1380.4191 |
| 1381.0212 | 1385.4439 | 1393.7687 |
| 1402.4030 | 1410.2678 | 1413.9526 |
| 1416.0030 | 1418.7403 | 1427.9688 |
| 1435.3524 | 1456.0232 | 1464.5772 |
| 1466.7419 | 1470.5378 | 1472.6947 |
| 1484.3251 | 1489.7514 | 1490.2801 |
| 1492.1390 | 1493.1379 | 1496.4614 |
| 1497.6543 | 1502.1591 | 1502.2449 |
| 1504.2460 | 1506.7969 | 1509.1633 |
| 1512.6139 | 1516.5404 | 1516.9373 |
| 1518.7683 | 1527.4060 | 1529.8309 |
| 1532.6356 | 1535.6591 | 1543.6020 |
| 1562.0133 | 1573.6295 | 1663.7845 |
| 1675.0021 | 1677.3733 | 1683.7163 |
| 1688.0928 | 1692.4409 | 1695.1181 |
| 1698.2893 | 1708.0550 | 1768.3288 |
| 2401.1135 | 3062.1366 | 3072.1149 |
| 3081.8679 | 3082.6526 | 3083.0454 |

|           |           |           |
|-----------|-----------|-----------|
| 3086.0097 | 3086.9129 | 3089.2384 |
| 3090.0266 | 3095.8267 | 3096.6545 |
| 3101.0341 | 3103.0452 | 3128.0119 |
| 3139.1317 | 3141.4372 | 3143.6064 |
| 3144.6470 | 3153.9840 | 3158.3345 |
| 3158.8825 | 3164.3535 | 3165.0385 |
| 3168.9652 | 3171.4631 | 3173.6830 |
| 3174.2220 | 3174.2880 | 3186.9874 |
| 3188.7903 | 3190.9508 | 3192.9531 |
| 3197.8341 | 3203.5691 | 3204.1581 |
| 3210.0263 | 3210.6557 | 3216.9584 |
| 3220.6328 | 3225.8506 | 3227.0674 |
| 3231.0799 | 3239.5283 | 3272.5053 |

### TS5'R

Zero-point correction= 0.668412

Thermal correction to Energy= 0.709454

Thermal correction to Enthalpy= 0.710398

Thermal correction to Gibbs Free Energy= 0.596488

Sum of electronic and zero-point Energies= -2025.234539

Sum of electronic and thermal Energies= -2025.193497

Sum of electronic and thermal Enthalpies= -2025.192553

Sum of electronic and thermal Free Energies= -2025.306463

Cartesian coordinates

|   |           |           |           |
|---|-----------|-----------|-----------|
| C | 0.331859  | -0.943496 | 1.696667  |
| C | -0.828360 | -0.108726 | 1.647322  |
| C | -1.285976 | 0.568995  | 0.533278  |
| O | 0.944494  | -1.284222 | 2.704154  |
| C | -2.702864 | 0.877834  | 0.278603  |
| C | -3.073303 | 1.670799  | -0.817454 |
| C | -3.694750 | 0.291600  | 1.076271  |
| C | -4.416160 | 1.831215  | -1.132589 |
| H | -2.306720 | 2.181703  | -1.394160 |
| C | -5.036487 | 0.475159  | 0.767055  |
| H | -3.418991 | -0.350899 | 1.906189  |
| C | -5.399145 | 1.232221  | -0.346292 |
| H | -4.697173 | 2.439582  | -1.985459 |
| H | -5.798905 | 0.004855  | 1.379942  |
| H | -6.447750 | 1.360443  | -0.595884 |
| C | -0.401496 | 0.662336  | -0.608016 |
| N | 0.330122  | 0.692101  | -1.507367 |
| H | -1.373842 | -0.027020 | 2.581447  |
| C | 0.758179  | -1.670308 | 0.426276  |
| C | 1.989910  | -2.745311 | -1.010259 |

|   |           |           |           |
|---|-----------|-----------|-----------|
| C | 3.271089  | -1.594553 | 0.811166  |
| H | 3.082512  | -1.817845 | 1.864352  |
| N | 0.759730  | -3.008088 | -1.352970 |
| N | 0.000237  | -2.334857 | -0.449140 |
| N | 2.030722  | -1.939963 | 0.093398  |
| C | 3.256648  | -3.266524 | -1.619532 |
| H | 3.212522  | -3.171302 | -2.705154 |
| H | 3.364979  | -4.328948 | -1.360245 |
| C | 4.429072  | -2.460623 | 0.259237  |
| O | 4.347197  | -2.508548 | -1.158400 |
| C | 5.177744  | -0.223142 | 0.564536  |
| C | 3.782811  | -0.181126 | 0.635442  |
| C | 3.095612  | 1.024917  | 0.611481  |
| C | 3.836131  | 2.205828  | 0.524642  |
| C | 5.228804  | 2.169121  | 0.464270  |
| C | 5.911090  | 0.952400  | 0.479860  |
| C | 5.677336  | -1.648712 | 0.607552  |
| H | 2.010062  | 1.079131  | 0.632611  |
| H | 5.786794  | 3.097475  | 0.395101  |
| H | 6.994780  | 0.924029  | 0.418340  |
| H | 6.031473  | -1.914905 | 1.609319  |
| H | 6.478426  | -1.857780 | -0.105020 |
| C | -1.438644 | -2.473316 | -0.466184 |
| C | -2.048358 | -3.093025 | 0.634367  |
| C | -2.160307 | -2.007146 | -1.571711 |
| C | -3.438764 | -3.175650 | 0.632336  |
| C | -3.550248 | -2.115079 | -1.511409 |
| C | -4.207033 | -2.677574 | -0.420777 |
| H | -3.932286 | -3.646650 | 1.478762  |
| H | -4.132150 | -1.735903 | -2.348658 |
| C | -1.542544 | -1.419889 | -2.815360 |
| H | -1.831380 | -2.023626 | -3.680071 |
| H | -0.457243 | -1.368228 | -2.777243 |
| H | -1.924303 | -0.406611 | -2.971494 |
| C | -5.709369 | -2.766898 | -0.396594 |
| H | -6.056201 | -3.611476 | -1.000475 |
| H | -6.154125 | -1.856885 | -0.807167 |
| H | -6.081343 | -2.905713 | 0.620810  |
| C | -1.270150 | -3.669135 | 1.790564  |
| H | -1.137119 | -2.936804 | 2.592899  |
| H | -0.279606 | -4.021507 | 1.491224  |
| H | -1.814208 | -4.517079 | 2.210208  |
| H | 4.422544  | -3.476586 | 0.673379  |
| H | 3.306688  | 3.151693  | 0.495916  |

|   |           |          |           |
|---|-----------|----------|-----------|
| C | -1.924230 | 2.927712 | 3.002516  |
| C | -1.757899 | 3.407670 | 1.564366  |
| H | -2.690289 | 2.142562 | 3.014009  |
| H | -1.004447 | 2.534550 | 3.439805  |
| H | -2.298475 | 3.749998 | 3.617459  |
| C | -0.517924 | 3.074238 | 0.931806  |
| C | -0.135733 | 3.529988 | -0.378077 |
| H | 0.284787  | 2.686299 | 1.548030  |
| O | 1.207528  | 3.341638 | -0.570352 |
| O | -2.706331 | 3.991616 | 1.028935  |
| O | -0.840871 | 3.977619 | -1.273016 |
| C | 1.705028  | 3.601503 | -1.883610 |
| C | 2.013160  | 5.076224 | -2.068986 |
| H | 2.608099  | 2.990345 | -1.966207 |
| H | 0.974287  | 3.255089 | -2.617637 |
| H | 2.444912  | 5.253017 | -3.057941 |
| H | 1.095946  | 5.661532 | -1.977175 |
| H | 2.727568  | 5.417145 | -1.314395 |

Vibrational frequencies

|          |          |          |
|----------|----------|----------|
| -71.5307 | 23.6179  | 34.0228  |
| 40.7698  | 43.7987  | 49.8249  |
| 54.6176  | 59.0536  | 68.9778  |
| 71.2512  | 74.8323  | 85.1144  |
| 93.3458  | 100.6250 | 104.4310 |
| 109.4602 | 110.4196 | 124.8768 |
| 127.9546 | 133.8185 | 137.2492 |
| 146.0365 | 148.4695 | 153.4638 |
| 162.8893 | 175.8123 | 179.8601 |
| 183.7650 | 190.2059 | 199.5210 |
| 209.0587 | 213.7046 | 219.7742 |
| 243.9848 | 245.2582 | 250.2098 |
| 261.6817 | 268.3990 | 287.8972 |
| 299.5473 | 302.0102 | 319.1603 |
| 323.2867 | 329.9395 | 339.8659 |
| 351.3814 | 362.3977 | 365.8170 |
| 390.7869 | 395.2356 | 398.6590 |
| 413.0526 | 422.5949 | 433.9315 |
| 450.4751 | 464.2076 | 468.7281 |
| 483.7781 | 494.7778 | 496.4110 |
| 503.1467 | 529.0457 | 534.0551 |
| 557.9825 | 567.0134 | 575.8990 |
| 583.6229 | 585.2146 | 592.1072 |
| 600.8531 | 619.8939 | 626.8169 |
| 633.0596 | 638.5001 | 651.0773 |

|           |           |           |
|-----------|-----------|-----------|
| 684.1476  | 694.9536  | 704.8738  |
| 709.5251  | 724.1216  | 736.9523  |
| 750.1639  | 753.0189  | 756.2186  |
| 772.4996  | 776.0452  | 781.8944  |
| 799.7681  | 809.1873  | 817.3444  |
| 819.9151  | 832.6816  | 842.4541  |
| 869.9614  | 871.7685  | 879.4582  |
| 884.9738  | 890.3134  | 899.0548  |
| 919.6214  | 921.6140  | 954.3492  |
| 961.3400  | 961.8198  | 972.4276  |
| 976.6245  | 977.3106  | 988.6497  |
| 995.7926  | 1001.8621 | 1020.9867 |
| 1025.4622 | 1025.8114 | 1027.8346 |
| 1037.2111 | 1038.9164 | 1041.1871 |
| 1044.3250 | 1052.5872 | 1054.8312 |
| 1056.0459 | 1061.0187 | 1062.5636 |
| 1063.9611 | 1066.9580 | 1077.3434 |
| 1081.5852 | 1112.0601 | 1117.5484 |
| 1135.4349 | 1140.0914 | 1145.3546 |
| 1175.0806 | 1179.1796 | 1183.3227 |
| 1183.6540 | 1192.3910 | 1202.8620 |
| 1209.1069 | 1215.1012 | 1225.2895 |
| 1230.5120 | 1238.7132 | 1254.2702 |
| 1261.5520 | 1271.3924 | 1285.5025 |
| 1287.7193 | 1294.0811 | 1310.3449 |
| 1317.6161 | 1322.9964 | 1333.7907 |
| 1341.6504 | 1344.0390 | 1349.8597 |
| 1361.1318 | 1366.1434 | 1376.6961 |
| 1379.3397 | 1380.6181 | 1381.4501 |
| 1385.4781 | 1396.3832 | 1410.1722 |
| 1417.6276 | 1423.0069 | 1428.7471 |
| 1430.7201 | 1461.9446 | 1466.2393 |
| 1469.9545 | 1475.9331 | 1481.0198 |
| 1488.0531 | 1490.9024 | 1492.7058 |
| 1495.1406 | 1495.3787 | 1500.0881 |
| 1500.6904 | 1502.9708 | 1505.4865 |
| 1512.9088 | 1515.3778 | 1517.7204 |
| 1519.3861 | 1530.7641 | 1533.8285 |
| 1539.3800 | 1550.0470 | 1567.4271 |
| 1574.9838 | 1665.9178 | 1667.1459 |
| 1680.8491 | 1686.3618 | 1691.3922 |
| 1694.3816 | 1699.9958 | 1704.7445 |
| 1723.6788 | 1782.7784 | 2384.2579 |
| 3056.7595 | 3068.1306 | 3070.8986 |

|           |           |           |
|-----------|-----------|-----------|
| 3073.6149 | 3075.9960 | 3085.5701 |
| 3086.6609 | 3098.9436 | 3107.1624 |
| 3136.2756 | 3144.9054 | 3144.9836 |
| 3150.5576 | 3150.7399 | 3151.8780 |
| 3152.2651 | 3163.4414 | 3164.5527 |
| 3164.8790 | 3172.3381 | 3175.3939 |
| 3177.1694 | 3187.0437 | 3202.0808 |
| 3203.7266 | 3205.5902 | 3209.2967 |
| 3215.0724 | 3216.4624 | 3219.5605 |
| 3220.5866 | 3221.6921 | 3222.5163 |
| 3231.6415 | 3235.9293 | 3243.1307 |

### TS5'S

Zero-point correction= 0.668042

Thermal correction to Energy= 0.709280

Thermal correction to Enthalpy= 0.710224

Thermal correction to Gibbs Free Energy= 0.594776

Sum of electronic and zero-point Energies= -2025.233177

Sum of electronic and thermal Energies= -2025.191939

Sum of electronic and thermal Enthalpies= -2025.190995

Sum of electronic and thermal Free Energies= -2025.306443

Cartesian coordinates

|   |           |           |           |
|---|-----------|-----------|-----------|
| C | -0.462264 | 0.188693  | -1.478194 |
| C | 0.814374  | -0.257527 | -1.040001 |
| C | 1.223287  | -0.706115 | 0.201653  |
| O | -0.760265 | 0.410263  | -2.649912 |
| C | 2.644467  | -0.632221 | 0.648696  |
| C | 3.011895  | -1.069048 | 1.927357  |
| C | 3.624383  | -0.089579 | -0.188781 |
| C | 4.328497  | -0.966851 | 2.357395  |
| H | 2.261560  | -1.495743 | 2.586934  |
| C | 4.946244  | -0.002873 | 0.238732  |
| H | 3.357131  | 0.288809  | -1.169144 |
| C | 5.303246  | -0.436037 | 1.513044  |
| H | 4.595473  | -1.305872 | 3.352884  |
| H | 5.694382  | 0.419278  | -0.424511 |
| H | 6.332267  | -0.357623 | 1.848772  |
| C | 0.260856  | -0.762144 | 1.277270  |
| N | -0.472131 | -0.796875 | 2.174236  |
| H | 1.524900  | -0.329715 | -1.855568 |
| C | -1.484397 | 0.869352  | -0.538071 |
| C | -2.636705 | 2.633535  | 0.060648  |
| C | -0.436031 | 3.143610  | -0.996502 |
| H | -0.103248 | 2.724513  | -1.952016 |

|   |           |           |           |
|---|-----------|-----------|-----------|
| N | -3.401079 | 1.618167  | 0.328284  |
| N | -2.673387 | 0.523483  | -0.044473 |
| N | -1.445194 | 2.218774  | -0.462595 |
| C | -2.976048 | 4.092860  | 0.143536  |
| H | -3.383994 | 4.329553  | 1.127290  |
| H | -3.738806 | 4.310556  | -0.616859 |
| C | -1.084829 | 4.531633  | -1.211604 |
| O | -1.822915 | 4.874985  | -0.046024 |
| C | 1.085883  | 4.814128  | -0.301691 |
| C | 0.735875  | 3.477683  | -0.094407 |
| C | 1.444284  | 2.680115  | 0.790086  |
| C | 2.546937  | 3.226303  | 1.448235  |
| C | 2.917701  | 4.551158  | 1.223476  |
| C | 2.182935  | 5.357989  | 0.352237  |
| C | 0.118520  | 5.474622  | -1.257998 |
| H | 1.145983  | 1.658336  | 0.985930  |
| H | 3.776718  | 4.964906  | 1.741758  |
| H | 2.457051  | 6.397398  | 0.199294  |
| H | 0.524020  | 5.517027  | -2.274748 |
| H | -0.172161 | 6.484755  | -0.961486 |
| C | -3.274294 | -0.771121 | 0.175604  |
| C | -3.589663 | -1.581832 | -0.919534 |
| C | -3.651293 | -1.081731 | 1.491605  |
| C | -4.231838 | -2.790753 | -0.647338 |
| C | -4.289899 | -2.302208 | 1.697658  |
| C | -4.574217 | -3.175090 | 0.646139  |
| H | -4.481022 | -3.440879 | -1.482299 |
| H | -4.579465 | -2.571921 | 2.710187  |
| C | -3.455576 | -0.141048 | 2.652405  |
| H | -4.311918 | 0.534982  | 2.734196  |
| H | -2.555283 | 0.462995  | 2.549173  |
| H | -3.375429 | -0.711419 | 3.579675  |
| C | -5.217388 | -4.510907 | 0.907248  |
| H | -5.853848 | -4.479219 | 1.794266  |
| H | -4.449134 | -5.272905 | 1.077262  |
| H | -5.819577 | -4.833510 | 0.055079  |
| C | -3.308214 | -1.196525 | -2.344747 |
| H | -2.327171 | -1.575478 | -2.638532 |
| H | -3.309457 | -0.114500 | -2.490684 |
| H | -4.066195 | -1.635486 | -2.996672 |
| H | -1.727072 | 4.564181  | -2.099914 |
| H | 3.114691  | 2.609083  | 2.137651  |
| C | -1.132629 | -3.702270 | 0.595439  |
| C | -0.177180 | -3.118393 | -0.431951 |



|   |           |           |           |
|---|-----------|-----------|-----------|
| H | -1.806506 | -4.402874 | 0.094689  |
| H | -0.614556 | -4.212900 | 1.409161  |
| H | -1.747526 | -2.900134 | 1.014819  |
| C | 1.211430  | -3.099315 | -0.084189 |
| C | 2.281779  | -2.989874 | -1.054872 |
| H | 1.502765  | -3.523183 | 0.870874  |
| O | 3.468919  | -3.368793 | -0.504955 |
| O | -0.633212 | -2.620614 | -1.471993 |
| O | 2.216182  | -2.591196 | -2.206792 |
| C | 4.606748  | -3.260289 | -1.361892 |
| C | 5.824175  | -3.626302 | -0.540831 |
| H | 4.478575  | -3.929149 | -2.219911 |
| H | 4.672933  | -2.237418 | -1.745908 |
| H | 6.724665  | -3.566945 | -1.157017 |
| H | 5.929886  | -2.937623 | 0.301239  |
| H | 5.735941  | -4.643644 | -0.151768 |

Vibrational frequencies

|           |          |          |
|-----------|----------|----------|
| -160.4646 | 17.8012  | 25.4548  |
| 26.8432   | 34.0792  | 49.3350  |
| 54.1203   | 60.1077  | 66.8339  |
| 73.1823   | 75.4006  | 85.3791  |
| 91.7939   | 101.7630 | 108.8157 |
| 113.2662  | 113.6169 | 116.0569 |
| 119.8069  | 124.3598 | 135.0364 |
| 143.7209  | 149.7163 | 156.7459 |
| 165.9008  | 170.3896 | 171.2468 |
| 186.2266  | 195.7217 | 197.9417 |
| 208.0105  | 216.6920 | 225.7357 |
| 237.5626  | 253.5739 | 260.5145 |
| 265.4247  | 268.2749 | 271.0618 |
| 288.4069  | 296.1266 | 296.8910 |
| 316.8531  | 328.9145 | 340.9126 |
| 345.4643  | 351.2916 | 355.1181 |
| 390.0709  | 394.5137 | 400.1849 |
| 412.6743  | 415.8055 | 428.3041 |
| 438.0019  | 459.1584 | 472.1352 |
| 486.9798  | 495.6255 | 501.9852 |
| 513.2315  | 519.9335 | 526.5837 |
| 554.5006  | 562.4500 | 573.3727 |
| 580.2637  | 588.1760 | 591.4090 |
| 604.7165  | 608.5625 | 626.8329 |
| 632.6749  | 639.4414 | 652.9122 |
| 679.5225  | 703.5317 | 707.3979 |
| 709.4830  | 726.4384 | 746.1835 |

|           |           |           |
|-----------|-----------|-----------|
| 748.4338  | 762.3266  | 765.2167  |
| 785.0882  | 786.6655  | 788.7624  |
| 806.0648  | 813.8048  | 823.9016  |
| 838.4675  | 840.2721  | 852.9142  |
| 867.7138  | 874.5730  | 877.3962  |
| 884.4260  | 898.6611  | 900.1656  |
| 916.9984  | 919.3869  | 946.2243  |
| 955.5980  | 967.9872  | 970.0670  |
| 977.4201  | 980.4313  | 993.9020  |
| 997.5086  | 1000.1054 | 1014.7274 |
| 1019.2785 | 1022.0644 | 1023.5280 |
| 1038.8614 | 1043.3864 | 1045.0370 |
| 1050.1868 | 1052.9896 | 1053.1786 |
| 1053.8396 | 1061.1959 | 1062.6639 |
| 1065.3444 | 1070.1233 | 1074.0340 |
| 1079.9474 | 1111.5546 | 1124.9178 |
| 1126.0284 | 1127.0853 | 1154.9149 |
| 1171.0978 | 1179.2363 | 1179.7292 |
| 1185.0499 | 1188.9304 | 1190.1979 |
| 1202.7537 | 1213.9314 | 1215.7825 |
| 1232.0727 | 1249.1368 | 1253.4209 |
| 1259.6246 | 1270.5598 | 1278.3163 |
| 1283.5498 | 1288.3384 | 1302.1009 |
| 1305.4053 | 1315.8006 | 1318.5699 |
| 1329.9633 | 1341.3572 | 1342.0741 |
| 1360.9175 | 1362.3654 | 1369.1792 |
| 1375.9238 | 1379.5137 | 1385.4786 |
| 1388.3484 | 1394.6051 | 1409.7981 |
| 1411.2513 | 1418.0271 | 1428.6750 |
| 1434.2187 | 1455.7281 | 1465.3767 |
| 1470.9838 | 1473.1753 | 1473.9790 |
| 1484.4627 | 1490.8344 | 1491.7525 |
| 1493.6279 | 1496.3216 | 1497.0188 |
| 1499.5725 | 1501.5074 | 1505.2158 |
| 1507.2187 | 1509.5669 | 1516.6815 |
| 1519.6050 | 1527.8522 | 1530.6332 |
| 1535.1958 | 1547.7854 | 1571.6272 |
| 1593.8717 | 1672.5651 | 1674.5413 |
| 1680.3776 | 1682.9922 | 1686.0041 |
| 1693.6186 | 1694.3944 | 1707.7934 |
| 1719.2812 | 1796.0235 | 2393.7562 |
| 3070.0452 | 3075.4634 | 3076.4529 |
| 3080.0613 | 3080.1927 | 3081.4285 |
| 3085.2141 | 3085.2329 | 3099.6449 |

|           |           |           |
|-----------|-----------|-----------|
| 3123.1841 | 3124.1851 | 3146.4394 |
| 3151.9114 | 3156.4462 | 3160.1840 |
| 3161.6748 | 3166.2402 | 3167.1520 |
| 3172.1331 | 3172.4342 | 3180.7232 |
| 3182.5225 | 3192.2381 | 3197.9682 |
| 3201.8908 | 3202.6829 | 3204.5099 |
| 3211.4672 | 3212.0272 | 3217.8480 |
| 3218.3899 | 3222.9428 | 3224.4973 |
| 3230.8353 | 3238.1480 | 3270.1382 |

### M5R

Zero-point correction= 0.795184

Thermal correction to Energy= 0.845477

Thermal correction to Enthalpy= 0.846421

Thermal correction to Gibbs Free Energy= 0.711313

Sum of electronic and zero-point Energies= -2725.366053

Sum of electronic and thermal Energies= -2725.315759

Sum of electronic and thermal Enthalpies= -2725.314815

Sum of electronic and thermal Free Energies= -2725.449924

Cartesian coordinates

|   |           |           |           |
|---|-----------|-----------|-----------|
| C | 0.501106  | -0.579494 | 1.048130  |
| C | -0.175796 | 0.435884  | 0.421605  |
| C | -0.943955 | 0.405408  | -0.880787 |
| O | 1.223075  | -0.520355 | 2.091147  |
| C | -2.465965 | 0.177509  | -0.768016 |
| C | -3.220129 | -0.142995 | -1.899231 |
| C | -3.111467 | 0.458758  | 0.434009  |
| C | -4.609119 | -0.164803 | -1.832515 |
| H | -2.721934 | -0.372722 | -2.839337 |
| C | -4.503878 | 0.459917  | 0.492874  |
| H | -2.521080 | 0.682776  | 1.317699  |
| C | -5.255643 | 0.154101  | -0.638848 |
| H | -5.186449 | -0.419677 | -2.715494 |
| H | -4.999560 | 0.687449  | 1.432080  |
| H | -6.340367 | 0.154745  | -0.590442 |
| C | -0.349590 | -0.591344 | -1.798019 |
| N | 0.153358  | -1.343704 | -2.520279 |
| H | -0.111964 | 1.397221  | 0.922165  |
| C | 0.502681  | -1.991263 | 0.486549  |
| C | 1.261248  | -3.917585 | -0.207057 |
| C | 3.033319  | -2.262107 | 0.433003  |
| H | 3.033414  | -1.901968 | 1.466514  |
| N | -0.022868 | -4.084597 | -0.098200 |
| N | -0.483377 | -2.878406 | 0.347657  |

|   |           |           |           |
|---|-----------|-----------|-----------|
| N | 1.633353  | -2.654260 | 0.165760  |
| C | 2.289622  | -4.921614 | -0.627693 |
| H | 1.977294  | -5.407677 | -1.553195 |
| H | 2.396712  | -5.684464 | 0.155911  |
| C | 3.940116  | -3.509430 | 0.255658  |
| O | 3.505519  | -4.259038 | -0.869875 |
| C | 4.983757  | -1.615488 | -0.750020 |
| C | 3.669535  | -1.233424 | -0.475362 |
| C | 3.183441  | -0.000322 | -0.891634 |
| C | 4.030146  | 0.843734  | -1.610140 |
| C | 5.334518  | 0.451874  | -1.912808 |
| C | 5.820951  | -0.781574 | -1.481790 |
| C | 5.312477  | -2.934995 | -0.094772 |
| H | 2.176104  | 0.316003  | -0.639672 |
| H | 5.979404  | 1.118080  | -2.476787 |
| H | 6.841061  | -1.080763 | -1.703194 |
| H | 5.900420  | -2.777596 | 0.815729  |
| H | 5.860566  | -3.628651 | -0.736757 |
| C | -1.864257 | -2.769436 | 0.745142  |
| C | -2.151644 | -2.520506 | 2.091930  |
| C | -2.856495 | -3.029998 | -0.210155 |
| C | -3.498912 | -2.446630 | 2.451414  |
| C | -4.179813 | -2.953136 | 0.210104  |
| C | -4.521350 | -2.648378 | 1.528832  |
| H | -3.747482 | -2.244634 | 3.490140  |
| H | -4.967448 | -3.128146 | -0.518953 |
| C | -2.541600 | -3.422293 | -1.629065 |
| H | -2.349950 | -4.497925 | -1.689932 |
| H | -1.657444 | -2.913590 | -2.014860 |
| H | -3.390123 | -3.185896 | -2.274585 |
| C | -5.967792 | -2.532917 | 1.926304  |
| H | -6.534977 | -3.412517 | 1.609891  |
| H | -6.421503 | -1.660857 | 1.442720  |
| H | -6.078234 | -2.419511 | 3.006536  |
| C | -1.087581 | -2.389672 | 3.150548  |
| H | -0.643135 | -1.392060 | 3.177601  |
| H | -0.269180 | -3.096857 | 2.983106  |
| H | -1.522613 | -2.601173 | 4.128921  |
| H | 3.941377  | -4.146290 | 1.148991  |
| H | 3.670078  | 1.821656  | -1.913010 |
| C | -0.817346 | 1.799321  | -1.667935 |
| C | 0.629721  | 2.202852  | -1.948067 |
| C | -1.574205 | 2.863207  | -0.890584 |
| H | -1.337489 | 1.661818  | -2.617233 |

|    |           |          |           |
|----|-----------|----------|-----------|
| C  | 1.180216  | 1.867989 | -3.304383 |
| O  | 1.306380  | 2.761386 | -1.103237 |
| O  | -2.766321 | 3.079270 | -1.404981 |
| O  | -1.154764 | 3.432611 | 0.100958  |
| H  | 0.436121  | 2.053053 | -4.081795 |
| H  | 2.079313  | 2.453891 | -3.490913 |
| H  | 1.431941  | 0.801399 | -3.334284 |
| Li | 0.719995  | 3.868009 | 0.423993  |
| C  | -3.640766 | 3.960476 | -0.658829 |
| O  | 1.448234  | 3.031592 | 1.965965  |
| Cl | 1.295167  | 6.004395 | 0.102424  |
| C  | -4.954391 | 4.008385 | -1.401696 |
| H  | -3.748852 | 3.543917 | 0.346959  |
| H  | -3.160879 | 4.938977 | -0.583024 |
| C  | 1.595732  | 3.851963 | 3.140997  |
| C  | 2.674934  | 2.310356 | 1.700118  |
| H  | -5.385104 | 3.007028 | -1.474898 |
| H  | -5.652384 | 4.652249 | -0.862424 |
| H  | -4.816196 | 4.411370 | -2.407154 |
| C  | 3.094597  | 3.908259 | 3.400889  |
| H  | 1.148502  | 4.826759 | 2.930725  |
| H  | 1.062411  | 3.372952 | 3.970015  |
| C  | 3.532357  | 2.515240 | 2.942266  |
| H  | 2.414731  | 1.265736 | 1.516914  |
| H  | 3.146365  | 2.745731 | 0.809631  |
| H  | 3.328659  | 4.121330 | 4.445456  |
| H  | 3.553311  | 4.677557 | 2.771010  |
| H  | 4.599547  | 2.442647 | 2.725284  |
| H  | 3.276258  | 1.767967 | 3.700580  |

Vibrational frequencies

|          |          |          |
|----------|----------|----------|
| 21.2566  | 27.2850  | 33.9588  |
| 37.5288  | 43.8226  | 46.2904  |
| 48.0458  | 50.9815  | 54.9602  |
| 58.9578  | 67.3275  | 69.1855  |
| 74.9624  | 77.3537  | 80.6678  |
| 86.4395  | 92.0192  | 98.4818  |
| 102.3770 | 104.5713 | 110.5089 |
| 111.0595 | 121.0303 | 127.3446 |
| 128.2025 | 131.2508 | 138.4230 |
| 141.1101 | 148.3448 | 152.4459 |
| 156.0773 | 162.2872 | 168.1788 |
| 181.8324 | 185.6362 | 194.7779 |
| 198.5903 | 207.7667 | 210.7034 |
| 214.8389 | 222.2681 | 235.0370 |

|           |           |           |
|-----------|-----------|-----------|
| 239.5394  | 241.7433  | 250.2359  |
| 275.8755  | 283.2445  | 284.7511  |
| 289.4515  | 289.8049  | 293.8972  |
| 298.6937  | 315.3779  | 322.0812  |
| 329.6689  | 341.5834  | 351.5340  |
| 364.6077  | 377.4223  | 389.4839  |
| 393.9882  | 404.5058  | 424.5621  |
| 425.6942  | 434.6599  | 442.6880  |
| 454.6709  | 473.6723  | 481.6205  |
| 493.6037  | 500.6012  | 503.8843  |
| 516.4246  | 518.9381  | 525.8976  |
| 528.4105  | 554.8726  | 562.9467  |
| 575.2013  | 576.5416  | 584.3319  |
| 586.6090  | 586.9404  | 598.8997  |
| 615.6461  | 624.6092  | 635.5127  |
| 649.6171  | 664.3987  | 679.7062  |
| 684.3359  | 694.4010  | 702.0990  |
| 721.6210  | 723.8577  | 749.9329  |
| 754.2054  | 761.5671  | 767.3789  |
| 772.0965  | 786.4766  | 794.2181  |
| 797.9172  | 812.0774  | 819.4074  |
| 837.8105  | 847.3404  | 866.7445  |
| 868.4508  | 878.1311  | 881.7650  |
| 883.8550  | 885.8531  | 893.5022  |
| 904.4133  | 919.4332  | 922.7129  |
| 924.0051  | 925.9887  | 939.0733  |
| 951.2568  | 952.6198  | 956.7176  |
| 959.9454  | 966.7378  | 981.4901  |
| 985.3144  | 987.9107  | 996.3802  |
| 1003.6474 | 1008.8250 | 1017.3079 |
| 1024.5688 | 1025.4939 | 1026.8280 |
| 1029.9695 | 1039.4625 | 1042.2380 |
| 1048.0215 | 1054.0290 | 1059.3811 |
| 1060.5058 | 1062.1065 | 1063.7716 |
| 1067.7811 | 1069.9724 | 1074.0805 |
| 1075.8937 | 1083.0147 | 1098.8519 |
| 1116.8875 | 1117.4213 | 1122.0330 |
| 1133.3464 | 1152.8805 | 1162.0699 |
| 1176.5736 | 1180.1431 | 1180.1544 |
| 1182.9676 | 1187.8094 | 1196.6272 |
| 1204.0250 | 1206.6336 | 1208.1179 |
| 1208.6063 | 1213.0758 | 1215.9589 |
| 1218.7265 | 1237.9736 | 1251.7607 |
| 1265.6689 | 1278.4076 | 1285.2455 |

|           |           |           |
|-----------|-----------|-----------|
| 1288.0633 | 1289.9605 | 1291.5912 |
| 1305.5021 | 1311.0639 | 1312.1436 |
| 1329.9253 | 1330.8332 | 1334.5979 |
| 1338.5136 | 1341.2391 | 1345.8794 |
| 1348.6948 | 1360.7659 | 1365.5795 |
| 1366.6455 | 1376.6921 | 1382.6280 |
| 1390.5188 | 1391.1952 | 1391.9547 |
| 1403.1510 | 1406.5861 | 1414.2517 |
| 1415.8829 | 1422.6395 | 1426.7658 |
| 1427.0359 | 1430.6477 | 1456.6082 |
| 1457.0546 | 1464.5448 | 1465.7719 |
| 1469.2424 | 1473.4551 | 1481.8843 |
| 1490.1790 | 1490.4410 | 1494.3704 |
| 1495.1076 | 1495.4339 | 1498.3071 |
| 1499.9676 | 1500.3159 | 1502.3825 |
| 1505.0481 | 1507.5691 | 1518.1094 |
| 1520.1742 | 1520.5157 | 1521.2743 |
| 1531.0423 | 1536.4059 | 1539.8940 |
| 1544.0403 | 1574.8857 | 1674.3764 |
| 1677.6514 | 1681.1922 | 1685.5316 |
| 1691.6215 | 1696.2167 | 1701.2375 |
| 1704.6983 | 1793.5718 | 1841.4068 |
| 2401.0994 | 3063.9887 | 3067.1231 |
| 3069.3725 | 3073.4290 | 3079.9869 |
| 3080.0503 | 3081.9436 | 3083.2607 |
| 3083.4424 | 3085.0362 | 3092.3531 |
| 3092.7758 | 3107.6697 | 3127.7407 |
| 3139.0800 | 3147.3313 | 3147.3612 |
| 3148.5789 | 3148.8162 | 3153.8081 |
| 3154.1022 | 3158.1074 | 3164.2109 |
| 3167.2099 | 3168.4489 | 3168.8236 |
| 3171.2560 | 3172.4039 | 3176.0262 |
| 3179.4496 | 3184.1820 | 3192.0351 |
| 3199.8563 | 3200.6732 | 3201.9607 |
| 3207.8572 | 3207.9030 | 3213.5889 |
| 3218.2152 | 3219.9576 | 3224.2817 |
| 3228.9925 | 3231.7465 | 3236.5522 |

### M5S

Zero-point correction= 0.794759

Thermal correction to Energy= 0.845264

Thermal correction to Enthalpy= 0.846208

Thermal correction to Gibbs Free Energy= 0.710542

Sum of electronic and zero-point Energies= -2725.359125

Sum of electronic and thermal Energies= -2725.308620  
Sum of electronic and thermal Enthalpies= -2725.307676  
Sum of electronic and thermal Free Energies= -2725.443342

Cartesian coordinates

|   |           |           |           |
|---|-----------|-----------|-----------|
| C | -0.559725 | 0.340113  | 1.030099  |
| C | 0.448609  | -0.323873 | 0.389106  |
| C | 0.732972  | -0.613955 | -1.056606 |
| O | -0.792120 | 0.352154  | 2.279497  |
| C | 0.457533  | -2.086577 | -1.463026 |
| C | 0.346076  | -2.436589 | -2.810685 |
| C | 0.424926  | -3.088583 | -0.493024 |
| C | 0.215702  | -3.770988 | -3.184469 |
| H | 0.360744  | -1.665882 | -3.577368 |
| C | 0.303969  | -4.425186 | -0.869140 |
| H | 0.475563  | -2.826666 | 0.558616  |
| C | 0.202173  | -4.771304 | -2.213792 |
| H | 0.127143  | -4.027228 | -4.235177 |
| H | 0.277941  | -5.194690 | -0.104258 |
| H | 0.104381  | -5.812270 | -2.504137 |
| C | -0.049747 | 0.244823  | -1.961510 |
| N | -0.649457 | 0.871896  | -2.725751 |
| H | 1.113829  | -0.830306 | 1.081913  |
| C | -1.621266 | 1.236513  | 0.377186  |
| C | -3.622706 | 2.127723  | 0.282509  |
| C | -3.546633 | -0.198457 | 1.187470  |
| H | -2.930281 | -0.446435 | 2.057509  |
| N | -2.818532 | 3.067645  | -0.111123 |
| N | -1.572878 | 2.502384  | -0.057371 |
| N | -2.932700 | 0.992100  | 0.589185  |
| C | -5.106204 | 2.192563  | 0.490333  |
| H | -5.582812 | 2.693042  | -0.353285 |
| H | -5.313156 | 2.765132  | 1.405417  |
| C | -5.007790 | 0.112175  | 1.593334  |
| O | -5.626989 | 0.887742  | 0.575023  |
| C | -4.925101 | -2.003474 | 0.502716  |
| C | -3.706205 | -1.373641 | 0.252043  |
| C | -2.827688 | -1.849925 | -0.705873 |
| C | -3.173943 | -2.996241 | -1.420557 |
| C | -4.386090 | -3.639194 | -1.168164 |
| C | -5.272045 | -3.146287 | -0.206892 |
| C | -5.687368 | -1.261062 | 1.577450  |
| H | -1.888541 | -1.344634 | -0.896534 |
| H | -4.649231 | -4.528607 | -1.731634 |
| H | -6.220836 | -3.642824 | -0.027353 |



|    |           |           |           |
|----|-----------|-----------|-----------|
| H  | -5.572239 | -1.747172 | 2.552295  |
| H  | -6.755084 | -1.155577 | 1.372483  |
| C  | -0.462123 | 3.329607  | -0.467851 |
| C  | 0.586565  | 3.592564  | 0.421058  |
| C  | -0.559171 | 3.955395  | -1.725809 |
| C  | 1.585683  | 4.473423  | -0.006002 |
| C  | 0.466641  | 4.822915  | -2.090115 |
| C  | 1.547844  | 5.094356  | -1.248537 |
| H  | 2.409302  | 4.681035  | 0.672640  |
| H  | 0.410753  | 5.310692  | -3.060428 |
| C  | -1.729569 | 3.779602  | -2.660039 |
| H  | -2.519390 | 4.494109  | -2.412018 |
| H  | -2.152383 | 2.777613  | -2.610142 |
| H  | -1.407068 | 3.964782  | -3.686685 |
| C  | 2.653232  | 6.013971  | -1.694710 |
| H  | 2.251116  | 6.906528  | -2.180605 |
| H  | 3.300492  | 5.510629  | -2.421256 |
| H  | 3.274019  | 6.324770  | -0.852287 |
| C  | 0.688318  | 3.011704  | 1.803809  |
| H  | 1.309787  | 2.110395  | 1.777713  |
| H  | -0.276857 | 2.725064  | 2.222072  |
| H  | 1.165410  | 3.734536  | 2.468761  |
| H  | -5.073250 | 0.633570  | 2.556239  |
| H  | -2.490500 | -3.382889 | -2.171130 |
| C  | 2.772525  | 2.081629  | -2.068507 |
| C  | 2.732797  | 1.033347  | -0.999437 |
| H  | 3.255780  | 1.690840  | -2.967286 |
| H  | 1.742855  | 2.355480  | -2.336113 |
| H  | 3.292574  | 2.963830  | -1.699453 |
| C  | 2.273675  | -0.357117 | -1.426640 |
| C  | 3.105068  | -1.455518 | -0.790481 |
| H  | 2.365589  | -0.463414 | -2.509536 |
| O  | 3.403215  | -2.400363 | -1.659425 |
| O  | 3.030758  | 1.269249  | 0.156523  |
| O  | 3.429246  | -1.494221 | 0.382351  |
| C  | 4.025578  | -3.593942 | -1.126725 |
| C  | 4.111882  | -4.586245 | -2.261889 |
| H  | 5.004601  | -3.322755 | -0.724331 |
| H  | 3.398507  | -3.958083 | -0.307145 |
| H  | 4.562967  | -5.513232 | -1.901716 |
| H  | 3.112570  | -4.807459 | -2.645141 |
| H  | 4.726014  | -4.193261 | -3.074863 |
| Li | 3.553585  | 0.020817  | 1.651852  |
| Cl | 5.663852  | 0.580648  | 2.216172  |

|   |           |           |          |
|---|-----------|-----------|----------|
| O | 2.459402  | -0.801367 | 3.040548 |
| C | 1.729355  | -0.051013 | 4.033298 |
| C | 2.136174  | -2.190241 | 3.158166 |
| C | 0.728817  | -1.029686 | 4.662981 |
| H | 2.439986  | 0.354459  | 4.759832 |
| H | 1.211308  | 0.756631  | 3.513772 |
| C | 0.703091  | -2.195384 | 3.667932 |
| H | 2.279372  | -2.643728 | 2.174016 |
| H | 2.818839  | -2.667638 | 3.873648 |
| H | -0.251643 | -0.567100 | 4.780923 |
| H | 1.082919  | -1.370691 | 5.640190 |
| H | 0.422461  | -3.146956 | 4.124159 |
| H | 0.012109  | -1.958461 | 2.852397 |

Vibrational frequencies

|          |          |          |
|----------|----------|----------|
| 20.0778  | 26.3001  | 30.7217  |
| 39.7612  | 43.0259  | 45.1011  |
| 56.3436  | 57.2775  | 58.7171  |
| 64.9616  | 67.9098  | 69.7408  |
| 71.8143  | 76.2934  | 79.2160  |
| 83.2042  | 88.6047  | 91.9907  |
| 98.2409  | 101.5447 | 102.9074 |
| 109.1814 | 115.7643 | 120.3175 |
| 124.7634 | 127.3335 | 131.0965 |
| 140.6255 | 146.4781 | 150.5794 |
| 156.9289 | 163.7584 | 166.7543 |
| 178.6712 | 180.0288 | 191.2836 |
| 197.3660 | 206.4103 | 211.7502 |
| 216.0452 | 218.7420 | 222.1789 |
| 229.3624 | 244.8792 | 255.7382 |
| 274.0056 | 281.6936 | 284.9953 |
| 288.0906 | 295.7322 | 297.4028 |
| 298.2700 | 317.7409 | 330.9017 |
| 336.7389 | 341.6930 | 352.2351 |
| 363.0558 | 380.5528 | 385.9896 |
| 402.3148 | 404.7375 | 414.8688 |
| 416.7306 | 428.6276 | 438.3946 |
| 447.3220 | 455.8527 | 465.9635 |
| 475.0787 | 485.5892 | 495.4178 |
| 501.5654 | 514.3331 | 521.5693 |
| 532.0117 | 546.9579 | 556.3336 |
| 576.3441 | 579.3922 | 581.6821 |
| 585.4784 | 587.5597 | 596.0488 |
| 609.3472 | 626.9029 | 636.3169 |
| 648.2743 | 669.6619 | 674.5986 |

|           |           |           |
|-----------|-----------|-----------|
| 695.3085  | 702.4594  | 710.8955  |
| 715.2838  | 726.8508  | 749.3804  |
| 753.6961  | 758.3134  | 766.0376  |
| 776.6221  | 787.1762  | 791.6952  |
| 808.9851  | 815.7765  | 833.8124  |
| 838.7734  | 843.6781  | 851.9626  |
| 867.4539  | 871.7950  | 878.2790  |
| 879.3234  | 891.9168  | 894.9528  |
| 900.0042  | 918.1283  | 918.7934  |
| 927.2797  | 941.0190  | 943.7160  |
| 950.9260  | 951.5164  | 955.4494  |
| 957.3663  | 969.4716  | 975.6202  |
| 978.4205  | 980.9545  | 984.8642  |
| 998.4955  | 999.7726  | 1016.7253 |
| 1020.0012 | 1021.0125 | 1022.1579 |
| 1023.8598 | 1038.2733 | 1043.4085 |
| 1049.7006 | 1054.3595 | 1058.5626 |
| 1062.4781 | 1063.8973 | 1065.5324 |
| 1067.0067 | 1070.5048 | 1072.4945 |
| 1073.9104 | 1082.4756 | 1095.7101 |
| 1120.1481 | 1121.8623 | 1128.6248 |
| 1133.5911 | 1150.4691 | 1171.7135 |
| 1172.2272 | 1177.1059 | 1180.9939 |
| 1183.5111 | 1187.5940 | 1197.0844 |
| 1197.4852 | 1200.9714 | 1203.6354 |
| 1209.7563 | 1211.8180 | 1218.5358 |
| 1234.3133 | 1237.9904 | 1259.4346 |
| 1274.0545 | 1275.1998 | 1280.7689 |
| 1285.5936 | 1286.1148 | 1288.7675 |
| 1306.7540 | 1309.1431 | 1314.1596 |
| 1322.0812 | 1325.7499 | 1331.4202 |
| 1333.7512 | 1337.5327 | 1346.3047 |
| 1349.4454 | 1351.9318 | 1362.7682 |
| 1367.7010 | 1376.1544 | 1382.6945 |
| 1383.7100 | 1387.0210 | 1388.8180 |
| 1400.9333 | 1404.8126 | 1413.0158 |
| 1416.2188 | 1418.4285 | 1421.7013 |
| 1425.2454 | 1427.9734 | 1454.7873 |
| 1456.6445 | 1461.0387 | 1461.5190 |
| 1464.0720 | 1467.7746 | 1476.9273 |
| 1483.0451 | 1485.7822 | 1489.0439 |
| 1490.5093 | 1493.8447 | 1497.9753 |
| 1498.0145 | 1500.3858 | 1501.2365 |
| 1502.6380 | 1505.1266 | 1515.8524 |

|           |           |           |
|-----------|-----------|-----------|
| 1519.8920 | 1523.6673 | 1525.3724 |
| 1530.4622 | 1540.6753 | 1543.7040 |
| 1544.7705 | 1556.0814 | 1674.9375 |
| 1676.4307 | 1686.5571 | 1687.9173 |
| 1691.3319 | 1693.9658 | 1710.3132 |
| 1717.7055 | 1801.6575 | 1850.6908 |
| 2414.6654 | 3063.4731 | 3063.9719 |
| 3064.1561 | 3065.7988 | 3076.6617 |
| 3079.8103 | 3081.9634 | 3087.7477 |
| 3090.8898 | 3095.9165 | 3099.8957 |
| 3104.4586 | 3104.5800 | 3127.6779 |
| 3135.5311 | 3142.7868 | 3149.9285 |
| 3151.7964 | 3154.1553 | 3154.3165 |
| 3154.8602 | 3155.0522 | 3165.3627 |
| 3170.8024 | 3172.8955 | 3174.1842 |
| 3174.3202 | 3174.6076 | 3182.6785 |
| 3190.5437 | 3192.9139 | 3194.2010 |
| 3195.2386 | 3196.9704 | 3205.1749 |
| 3206.4645 | 3211.5864 | 3214.7477 |
| 3218.4142 | 3220.0853 | 3225.4554 |
| 3235.7693 | 3236.0317 | 3254.7748 |

### M5'R

Zero-point correction= 0.669928

Thermal correction to Energy= 0.711273

Thermal correction to Enthalpy= 0.712217

Thermal correction to Gibbs Free Energy= 0.597212

Sum of electronic and zero-point Energies= -2025.273414

Sum of electronic and thermal Energies= -2025.232069

Sum of electronic and thermal Enthalpies= -2025.231125

Sum of electronic and thermal Free Energies= -2025.346130

Cartesian coordinates

|   |           |           |           |
|---|-----------|-----------|-----------|
| C | 0.719175  | -0.148069 | 1.480328  |
| C | -0.206048 | 0.800056  | 1.133589  |
| C | -0.852824 | 1.074109  | -0.206042 |
| O | 1.327771  | -0.294625 | 2.584314  |
| C | -2.231061 | 0.423927  | -0.448173 |
| C | -2.775822 | 0.371398  | -1.733111 |
| C | -3.011213 | 0.048859  | 0.643917  |
| C | -4.092163 | -0.036380 | -1.922149 |
| H | -2.170663 | 0.654578  | -2.591249 |
| C | -4.338049 | -0.333336 | 0.455301  |
| H | -2.576380 | 0.071475  | 1.638824  |
| C | -4.883756 | -0.372207 | -0.825288 |

|   |           |           |           |
|---|-----------|-----------|-----------|
| H | -4.503890 | -0.077587 | -2.925660 |
| H | -4.940400 | -0.615513 | 1.314680  |
| H | -5.918061 | -0.672298 | -0.970260 |
| C | 0.077638  | 0.722036  | -1.300850 |
| N | 0.834522  | 0.486542  | -2.145415 |
| H | -0.443093 | 1.515323  | 1.912872  |
| C | 1.182076  | -1.194968 | 0.477691  |
| C | 2.533413  | -2.468239 | -0.674207 |
| C | 3.673775  | -0.757983 | 0.762555  |
| H | 3.494279  | -0.797899 | 1.841105  |
| N | 1.355400  | -2.985913 | -0.853964 |
| N | 0.522311  | -2.188162 | -0.120811 |
| N | 2.479552  | -1.380577 | 0.154447  |
| C | 3.844416  | -2.954022 | -1.212067 |
| H | 3.761165  | -3.139897 | -2.283895 |
| H | 4.117944  | -3.892049 | -0.708713 |
| C | 4.926747  | -1.574602 | 0.349897  |
| O | 4.819912  | -1.961637 | -1.014479 |
| C | 5.403265  | 0.753534  | 0.168687  |
| C | 4.021961  | 0.652259  | 0.341688  |
| C | 3.205561  | 1.773194  | 0.264642  |
| C | 3.791741  | 3.003440  | -0.028400 |
| C | 5.167516  | 3.103957  | -0.238712 |
| C | 5.984826  | 1.978793  | -0.134075 |
| C | 6.077532  | -0.571620 | 0.431226  |
| H | 2.140021  | 1.704476  | 0.455689  |
| H | 5.608532  | 4.069271  | -0.465787 |
| H | 7.058453  | 2.060277  | -0.275874 |
| H | 6.522953  | -0.586571 | 1.430721  |
| H | 6.855653  | -0.830126 | -0.291885 |
| C | -0.848982 | -2.595511 | 0.048238  |
| C | -1.282893 | -2.951783 | 1.329136  |
| C | -1.650781 | -2.726061 | -1.093195 |
| C | -2.608650 | -3.373074 | 1.457017  |
| C | -2.957673 | -3.162219 | -0.904939 |
| C | -3.458765 | -3.474292 | 0.360389  |
| H | -2.973154 | -3.647782 | 2.444064  |
| H | -3.607128 | -3.251304 | -1.772222 |
| C | -1.138685 | -2.454214 | -2.482384 |
| H | -0.591195 | -3.322598 | -2.860542 |
| H | -0.458180 | -1.602561 | -2.513041 |
| H | -1.977698 | -2.255542 | -3.153339 |
| C | -4.894244 | -3.896984 | 0.518625  |
| H | -5.148087 | -4.701219 | -0.180567 |

|   |           |           |           |
|---|-----------|-----------|-----------|
| H | -5.559694 | -3.052867 | 0.302067  |
| H | -5.100045 | -4.242769 | 1.535561  |
| C | -0.375125 | -2.952349 | 2.531456  |
| H | -0.253039 | -1.957065 | 2.965928  |
| H | 0.627351  | -3.305603 | 2.271402  |
| H | -0.782532 | -3.619008 | 3.294351  |
| H | 5.065147  | -2.462978 | 0.978110  |
| H | 3.165728  | 3.888776  | -0.061197 |
| C | -1.129394 | 2.635260  | -0.399012 |
| C | 0.132617  | 3.500705  | -0.301125 |
| C | -2.199583 | 3.062706  | 0.595915  |
| H | -1.556799 | 2.747221  | -1.397629 |
| C | 0.647636  | 4.036871  | -1.613046 |
| O | 0.671182  | 3.723662  | 0.759116  |
| O | -3.371722 | 3.218813  | -0.023737 |
| O | -2.038448 | 3.215221  | 1.782260  |
| H | -0.152487 | 4.561674  | -2.143036 |
| H | 1.486392  | 4.710549  | -1.442677 |
| H | 0.964413  | 3.200257  | -2.245989 |
| C | -4.504594 | 3.447996  | 0.835079  |
| C | -5.737614 | 3.413705  | -0.038399 |
| H | -4.520134 | 2.662110  | 1.597677  |
| H | -4.375673 | 4.409700  | 1.338794  |
| H | -5.826490 | 2.439557  | -0.525732 |
| H | -6.627228 | 3.583176  | 0.572314  |
| H | -5.689898 | 4.190781  | -0.805648 |

Vibrational frequencies

|          |          |          |
|----------|----------|----------|
| 21.2675  | 29.1368  | 36.3454  |
| 42.0945  | 48.5559  | 50.1477  |
| 58.8454  | 65.9628  | 69.8663  |
| 79.6234  | 87.5967  | 93.2378  |
| 94.5448  | 104.1725 | 112.0566 |
| 115.8251 | 117.5891 | 122.1307 |
| 124.3309 | 129.9751 | 143.4798 |
| 149.3425 | 156.3552 | 164.5347 |
| 169.4846 | 177.5143 | 183.7432 |
| 190.9089 | 203.4202 | 210.2608 |
| 212.3449 | 217.2513 | 235.1538 |
| 237.5807 | 259.9416 | 263.8255 |
| 276.1824 | 281.2737 | 284.9245 |
| 289.8739 | 294.3067 | 310.0362 |
| 318.8890 | 327.8583 | 343.2974 |
| 353.3384 | 364.3577 | 371.6654 |
| 392.2927 | 401.6192 | 417.7912 |

|           |           |           |
|-----------|-----------|-----------|
| 418.4694  | 428.4329  | 436.7769  |
| 452.7199  | 469.2325  | 481.7479  |
| 493.7856  | 500.8013  | 515.2612  |
| 518.5712  | 525.6972  | 555.1230  |
| 561.2950  | 567.8103  | 572.5590  |
| 584.7283  | 586.1143  | 596.7445  |
| 613.4698  | 625.4178  | 634.6326  |
| 648.0279  | 663.1370  | 676.7517  |
| 682.5248  | 701.2382  | 716.7795  |
| 724.0469  | 749.8452  | 753.1138  |
| 759.7637  | 763.0746  | 772.0311  |
| 780.2312  | 785.2792  | 800.0593  |
| 809.4803  | 811.2473  | 833.8127  |
| 846.1945  | 866.8297  | 870.0075  |
| 874.5516  | 881.3968  | 884.9481  |
| 902.3618  | 903.6118  | 919.5061  |
| 922.2119  | 944.4423  | 954.9711  |
| 963.0239  | 968.9347  | 979.4502  |
| 983.3702  | 986.7965  | 1001.7589 |
| 1006.4597 | 1013.7017 | 1018.7875 |
| 1022.0030 | 1023.6371 | 1025.4664 |
| 1040.1022 | 1042.3766 | 1047.7984 |
| 1054.2319 | 1059.1494 | 1060.9530 |
| 1063.7386 | 1068.5113 | 1071.2425 |
| 1075.1096 | 1077.0151 | 1081.0647 |
| 1103.3707 | 1113.4906 | 1118.4703 |
| 1132.0026 | 1153.5777 | 1163.7210 |
| 1176.2792 | 1177.2517 | 1181.0985 |
| 1184.6696 | 1186.2400 | 1196.9376 |
| 1202.9276 | 1204.5593 | 1214.6212 |
| 1218.0317 | 1234.7388 | 1247.6631 |
| 1259.6491 | 1265.7512 | 1281.1570 |
| 1287.5183 | 1301.3013 | 1304.7179 |
| 1306.7744 | 1323.4978 | 1333.4028 |
| 1336.1307 | 1340.2217 | 1343.4901 |
| 1351.7050 | 1364.6011 | 1366.8507 |
| 1374.9950 | 1380.6247 | 1381.0733 |
| 1385.9315 | 1401.8966 | 1404.4353 |
| 1410.0848 | 1415.2917 | 1418.5756 |
| 1422.3330 | 1431.1233 | 1444.4158 |
| 1455.9550 | 1467.8029 | 1469.4890 |
| 1475.2900 | 1480.2338 | 1480.8610 |
| 1488.7917 | 1489.9675 | 1491.9297 |
| 1493.2092 | 1498.2167 | 1499.6033 |

|           |           |           |
|-----------|-----------|-----------|
| 1503.1934 | 1503.4389 | 1509.7300 |
| 1517.5782 | 1523.6044 | 1523.9088 |
| 1537.2079 | 1539.5541 | 1544.0736 |
| 1573.0973 | 1673.8359 | 1675.9256 |
| 1681.4650 | 1688.6057 | 1692.5313 |
| 1698.1635 | 1706.2555 | 1716.0344 |
| 1844.8492 | 1881.1020 | 2395.2623 |
| 3051.2999 | 3063.7535 | 3075.2109 |
| 3075.2578 | 3075.8305 | 3079.6662 |
| 3088.1126 | 3097.7432 | 3104.7527 |
| 3119.7032 | 3128.2672 | 3143.4952 |
| 3145.9581 | 3146.7691 | 3146.7822 |
| 3150.4432 | 3152.3048 | 3154.0016 |
| 3164.2275 | 3167.0331 | 3168.8165 |
| 3171.1335 | 3188.7659 | 3189.2599 |
| 3191.6282 | 3193.4375 | 3196.9659 |
| 3203.9758 | 3204.8226 | 3207.3624 |
| 3218.1205 | 3218.2715 | 3225.8757 |
| 3229.4452 | 3233.1136 | 3243.0213 |

### TS5Sb

Zero-point correction= 0.792603

Thermal correction to Energy= 0.842877

Thermal correction to Enthalpy= 0.843821

Thermal correction to Gibbs Free Energy= 0.706975

Sum of electronic and zero-point Energies= -2725.333574

Sum of electronic and thermal Energies= -2725.283300

Sum of electronic and thermal Enthalpies= -2725.282355

Sum of electronic and thermal Free Energies= -2725.419201

Cartesian coordinates

|   |           |           |           |
|---|-----------|-----------|-----------|
| C | -0.469938 | 0.468587  | 0.921521  |
| C | 0.334918  | -0.522614 | 0.319509  |
| C | 0.477573  | -0.891612 | -1.026374 |
| O | -0.402010 | 0.821378  | 2.104193  |
| C | 0.745121  | -2.322747 | -1.389925 |
| C | 0.475615  | -2.784758 | -2.681747 |
| C | 1.249450  | -3.214230 | -0.434117 |
| C | 0.688549  | -4.119883 | -3.014053 |
| H | 0.092400  | -2.102640 | -3.434593 |
| C | 1.470303  | -4.544940 | -0.776859 |
| H | 1.485725  | -2.881338 | 0.572872  |
| C | 1.186260  | -5.005379 | -2.060712 |
| H | 0.466673  | -4.463566 | -4.018313 |
| H | 1.862138  | -5.225910 | -0.028642 |



|   |           |           |           |
|---|-----------|-----------|-----------|
| H | 1.353654  | -6.046550 | -2.316946 |
| C | -0.327162 | -0.175093 | -1.998960 |
| N | -0.948368 | 0.381036  | -2.802580 |
| H | 0.926779  | -1.055521 | 1.060127  |
| C | -1.810709 | 0.971166  | 0.332589  |
| C | -3.982533 | 1.206713  | 0.493363  |
| C | -3.072539 | -0.835204 | 1.603196  |
| H | -2.244499 | -0.817735 | 2.318886  |
| N | -3.568771 | 2.273874  | -0.122428 |
| N | -2.214331 | 2.115879  | -0.220250 |
| N | -2.938034 | 0.376136  | 0.781593  |
| C | -5.366676 | 0.900352  | 0.987893  |
| H | -6.094162 | 1.042500  | 0.188432  |
| H | -5.599283 | 1.594962  | 1.806610  |
| C | -4.431699 | -0.801681 | 2.339917  |
| O | -5.445919 | -0.438915 | 1.410796  |
| C | -4.023756 | -2.998665 | 1.542394  |
| C | -3.143690 | -2.154908 | 0.862747  |
| C | -2.470137 | -2.579109 | -0.270417 |
| C | -2.653163 | -3.891952 | -0.706089 |
| C | -3.507945 | -4.749609 | -0.014339 |
| C | -4.207530 | -4.305535 | 1.110047  |
| C | -4.669093 | -2.270334 | 2.699958  |
| H | -1.826778 | -1.906517 | -0.822066 |
| H | -3.642404 | -5.768365 | -0.361276 |
| H | -4.891766 | -4.968530 | 1.631190  |
| H | -4.175883 | -2.507473 | 3.648349  |
| H | -5.736341 | -2.471813 | 2.807502  |
| C | -1.479747 | 3.153052  | -0.905822 |
| C | -0.545719 | 3.924842  | -0.204982 |
| C | -1.842354 | 3.420421  | -2.234701 |
| C | 0.074491  | 4.963315  | -0.901765 |
| C | -1.165599 | 4.451101  | -2.885695 |
| C | -0.201530 | 5.227062  | -2.240567 |
| H | 0.803025  | 5.573983  | -0.374857 |
| H | -1.415168 | 4.661921  | -3.921837 |
| C | -2.956752 | 2.700675  | -2.948870 |
| H | -3.911893 | 3.192368  | -2.740004 |
| H | -3.039048 | 1.657535  | -2.646776 |
| H | -2.782134 | 2.728295  | -4.026731 |
| C | 0.541610  | 6.308328  | -2.979168 |
| H | -0.026225 | 6.662525  | -3.841700 |
| H | 1.500447  | 5.925700  | -3.344965 |
| H | 0.753044  | 7.157783  | -2.325766 |

|    |           |           |           |
|----|-----------|-----------|-----------|
| C  | -0.175060 | 3.685163  | 1.232233  |
| H  | 0.662150  | 2.982025  | 1.286955  |
| H  | -0.995721 | 3.264037  | 1.816391  |
| H  | 0.137657  | 4.625001  | 1.692177  |
| H  | -4.431358 | -0.117304 | 3.196791  |
| H  | -2.121519 | -4.238427 | -1.587439 |
| C  | 1.888752  | 2.420336  | -2.075616 |
| C  | 2.249088  | 1.260043  | -1.183626 |
| H  | 2.402756  | 2.351646  | -3.036393 |
| H  | 0.808226  | 2.408417  | -2.272813 |
| H  | 2.136758  | 3.356618  | -1.576811 |
| C  | 2.348806  | -0.041166 | -1.796754 |
| C  | 3.282044  | -1.010163 | -1.241369 |
| H  | 2.236897  | -0.094280 | -2.875400 |
| O  | 3.673805  | -1.912615 | -2.143647 |
| O  | 2.353624  | 1.418946  | 0.043374  |
| O  | 3.675648  | -1.046548 | -0.078874 |
| C  | 4.556234  | -2.946908 | -1.669721 |
| C  | 4.745332  | -3.922502 | -2.807518 |
| H  | 5.498927  | -2.486386 | -1.357158 |
| H  | 4.100160  | -3.421067 | -0.796391 |
| H  | 5.405521  | -4.734327 | -2.491508 |
| H  | 3.782999  | -4.348723 | -3.100487 |
| H  | 5.192182  | -3.428448 | -3.673398 |
| Li | 3.019584  | 0.061650  | 1.352495  |
| Cl | 2.503719  | -1.552893 | 2.969327  |
| O  | 3.999374  | 1.424608  | 2.361317  |
| C  | 4.832358  | 0.979706  | 3.448899  |
| C  | 2.988009  | 2.330084  | 2.852498  |
| C  | 4.053162  | 1.311706  | 4.712282  |
| H  | 5.008742  | -0.090364 | 3.318161  |
| H  | 5.783890  | 1.523633  | 3.404282  |
| C  | 3.354227  | 2.611116  | 4.307236  |
| H  | 2.983199  | 3.218167  | 2.217308  |
| H  | 2.009531  | 1.834990  | 2.774090  |
| H  | 4.696469  | 1.416972  | 5.587647  |
| H  | 3.316760  | 0.523937  | 4.892743  |
| H  | 2.475303  | 2.839943  | 4.913732  |
| H  | 4.049115  | 3.454588  | 4.371278  |

Vibrational frequencies

|           |         |         |
|-----------|---------|---------|
| -286.0912 | 7.1805  | 23.1412 |
| 24.5457   | 32.8141 | 36.5920 |
| 42.4870   | 46.2212 | 50.5681 |
| 56.2408   | 60.8334 | 63.2391 |

|           |           |           |
|-----------|-----------|-----------|
| 65.6874   | 72.9618   | 81.0243   |
| 84.4967   | 85.0231   | 86.9194   |
| 94.0991   | 100.1218  | 107.0770  |
| 110.8644  | 114.5679  | 116.8199  |
| 120.0197  | 126.8667  | 132.5137  |
| 140.3191  | 143.5757  | 146.9570  |
| 152.7444  | 162.2046  | 173.3893  |
| 177.2154  | 179.0600  | 187.5749  |
| 201.1975  | 204.6527  | 207.1265  |
| 218.2958  | 221.8403  | 230.7388  |
| 236.4121  | 249.7573  | 257.7453  |
| 261.1443  | 264.7206  | 275.9617  |
| 281.4337  | 286.3225  | 287.1038  |
| 288.6433  | 295.4799  | 319.4951  |
| 323.9367  | 329.7240  | 347.9543  |
| 351.1517  | 365.1447  | 374.8530  |
| 393.5947  | 402.6245  | 409.5727  |
| 412.0296  | 420.9631  | 434.2230  |
| 442.4764  | 455.9704  | 460.0971  |
| 476.1119  | 485.2523  | 496.9547  |
| 507.8826  | 511.7463  | 521.1420  |
| 525.8022  | 528.1156  | 553.9728  |
| 573.0071  | 574.7164  | 580.1153  |
| 588.0162  | 588.3700  | 591.4754  |
| 606.3490  | 609.9730  | 628.3273  |
| 639.0971  | 650.3192  | 653.3015  |
| 679.5669  | 686.9075  | 703.7935  |
| 705.5706  | 713.8619  | 725.9082  |
| 750.0741  | 751.6162  | 762.1174  |
| 772.4891  | 785.7430  | 787.6453  |
| 791.9302  | 807.6092  | 818.0345  |
| 823.7185  | 839.5709  | 862.1177  |
| 866.3974  | 872.7194  | 877.5074  |
| 883.3035  | 891.7123  | 895.8155  |
| 896.6474  | 902.3618  | 917.8801  |
| 919.8479  | 921.5508  | 927.6687  |
| 936.6799  | 950.5158  | 950.6923  |
| 955.9617  | 969.3612  | 973.5400  |
| 978.9558  | 980.0392  | 983.1005  |
| 992.4140  | 1003.6143 | 1004.7289 |
| 1016.8365 | 1017.8799 | 1020.2010 |
| 1027.4166 | 1039.0213 | 1043.2476 |
| 1044.3701 | 1048.9445 | 1052.4830 |
| 1054.0685 | 1056.2653 | 1059.4689 |

|           |           |           |
|-----------|-----------|-----------|
| 1064.3893 | 1064.7610 | 1065.7615 |
| 1071.3785 | 1075.1195 | 1078.8809 |
| 1108.7811 | 1115.2141 | 1124.6137 |
| 1125.7724 | 1127.9974 | 1155.3353 |
| 1166.3682 | 1176.8168 | 1178.5796 |
| 1180.3877 | 1184.7310 | 1187.3266 |
| 1203.5622 | 1203.7509 | 1206.3878 |
| 1215.1953 | 1217.3360 | 1220.0823 |
| 1231.0466 | 1251.3528 | 1254.7099 |
| 1269.4444 | 1271.1839 | 1279.1875 |
| 1283.3362 | 1283.9022 | 1287.6709 |
| 1296.9667 | 1303.1917 | 1312.8035 |
| 1316.6329 | 1323.6314 | 1324.0132 |
| 1335.6100 | 1341.2794 | 1342.0757 |
| 1356.4349 | 1358.3991 | 1360.7339 |
| 1372.9604 | 1377.5858 | 1380.2459 |
| 1385.7821 | 1392.3357 | 1393.2366 |
| 1404.8562 | 1408.8304 | 1416.8311 |
| 1419.7570 | 1424.6548 | 1427.9719 |
| 1439.0328 | 1455.6943 | 1464.7990 |
| 1470.5984 | 1474.1657 | 1475.7621 |
| 1482.3163 | 1488.0820 | 1490.6934 |
| 1493.5662 | 1494.3755 | 1495.3436 |
| 1496.6920 | 1499.1523 | 1499.5211 |
| 1502.6741 | 1502.8940 | 1503.7547 |
| 1506.2139 | 1514.7165 | 1517.8744 |
| 1520.3997 | 1526.4389 | 1529.5754 |
| 1535.4932 | 1537.5332 | 1546.2814 |
| 1561.5314 | 1571.1426 | 1668.6761 |
| 1673.5093 | 1676.1587 | 1682.3902 |
| 1685.8786 | 1689.5226 | 1692.3484 |
| 1702.5869 | 1706.9967 | 1777.0969 |
| 2401.8283 | 3056.5264 | 3064.1528 |
| 3067.5934 | 3069.5766 | 3073.7024 |
| 3074.6997 | 3074.9496 | 3078.5363 |
| 3086.7952 | 3089.2545 | 3097.0317 |
| 3097.1725 | 3105.5230 | 3128.5770 |
| 3145.6147 | 3146.8597 | 3147.4573 |
| 3147.7584 | 3151.6141 | 3153.0058 |
| 3153.8681 | 3155.2403 | 3158.3748 |
| 3160.0290 | 3168.8978 | 3169.6153 |
| 3170.3019 | 3171.4307 | 3174.0008 |
| 3178.8924 | 3191.0361 | 3192.8848 |
| 3195.9697 | 3201.0959 | 3209.1008 |

|           |           |           |
|-----------|-----------|-----------|
| 3210.1841 | 3214.8403 | 3215.6173 |
| 3217.0043 | 3221.0288 | 3225.7665 |
| 3230.7461 | 3237.5367 | 3262.2756 |

### M5'S

Zero-point correction= 0.670363

Thermal correction to Energy= 0.711609

Thermal correction to Enthalpy= 0.712553

Thermal correction to Gibbs Free Energy= 0.597882

Sum of electronic and zero-point Energies= -2025.264305

Sum of electronic and thermal Energies= -2025.223058

Sum of electronic and thermal Enthalpies= -2025.222114

Sum of electronic and thermal Free Energies= -2025.336786

Cartesian coordinates

|   |           |           |           |
|---|-----------|-----------|-----------|
| C | -0.460619 | -0.311985 | -1.551069 |
| C | 0.694837  | 0.335876  | -1.221311 |
| C | 1.340597  | 0.691329  | 0.088312  |
| O | -0.986630 | -0.408747 | -2.703196 |
| C | 1.240207  | 2.200289  | 0.450023  |
| C | 1.444661  | 2.627066  | 1.764812  |
| C | 1.050240  | 3.153060  | -0.551456 |
| C | 1.464274  | 3.984340  | 2.074036  |
| H | 1.587948  | 1.897230  | 2.557238  |
| C | 1.079322  | 4.512089  | -0.242674 |
| H | 0.870707  | 2.834958  | -1.572491 |
| C | 1.287319  | 4.933076  | 1.068150  |
| H | 1.619369  | 4.298623  | 3.101160  |
| H | 0.929806  | 5.241947  | -1.031754 |
| H | 1.304323  | 5.991693  | 1.306413  |
| C | 0.768579  | -0.059659 | 1.219402  |
| N | 0.357852  | -0.591107 | 2.160950  |
| H | 1.207322  | 0.748068  | -2.083516 |
| C | -1.362123 | -1.103857 | -0.592875 |
| C | -3.310148 | -1.892147 | 0.037749  |
| C | -3.379699 | 0.364196  | -1.030182 |
| H | -2.987666 | 0.515104  | -2.040953 |
| N | -2.465182 | -2.841434 | 0.300336  |
| N | -1.251170 | -2.339240 | -0.086829 |
| N | -2.679163 | -0.812660 | -0.506107 |
| C | -4.800516 | -1.897606 | 0.196367  |
| H | -5.074345 | -2.323935 | 1.162325  |
| H | -5.243632 | -2.511533 | -0.600400 |
| C | -4.906772 | 0.106127  | -1.040193 |
| O | -5.281760 | -0.575741 | 0.150613  |

|   |           |           |           |
|---|-----------|-----------|-----------|
| C | -4.480310 | 2.279933  | -0.163744 |
| C | -3.257755 | 1.608777  | -0.183131 |
| C | -2.146199 | 2.110177  | 0.472718  |
| C | -2.261583 | 3.320199  | 1.155934  |
| C | -3.479615 | 4.000623  | 1.175431  |
| C | -4.598700 | 3.484677  | 0.517730  |
| C | -5.515076 | 1.509598  | -0.952779 |
| H | -1.203694 | 1.576588  | 0.450783  |
| H | -3.560916 | 4.940424  | 1.712358  |
| H | -5.546397 | 4.014046  | 0.546566  |
| H | -5.638635 | 1.929199  | -1.956907 |
| H | -6.497512 | 1.468870  | -0.476722 |
| C | -0.097068 | -3.181103 | 0.125144  |
| C | 0.717508  | -3.545454 | -0.952401 |
| C | 0.082381  | -3.707048 | 1.419488  |
| C | 1.772032  | -4.426402 | -0.688852 |
| C | 1.145896  | -4.582473 | 1.613661  |
| C | 2.003625  | -4.953047 | 0.575443  |
| H | 2.418472  | -4.711152 | -1.515208 |
| H | 1.301604  | -4.996273 | 2.607265  |
| C | -0.840317 | -3.414766 | 2.575703  |
| H | -1.689185 | -4.103934 | 2.566335  |
| H | -1.229686 | -2.398412 | 2.546250  |
| H | -0.299505 | -3.546009 | 3.515204  |
| C | 3.160837  | -5.880464 | 0.836208  |
| H | 2.856765  | -6.723489 | 1.462035  |
| H | 3.963265  | -5.355019 | 1.365984  |
| H | 3.573945  | -6.271027 | -0.095976 |
| C | 0.517261  | -3.066123 | -2.363002 |
| H | 1.143161  | -2.186220 | -2.543277 |
| H | -0.512915 | -2.779092 | -2.574222 |
| H | 0.818938  | -3.852306 | -3.058461 |
| H | -5.227586 | -0.467598 | -1.918363 |
| H | -1.394457 | 3.727223  | 1.668698  |
| C | 3.564353  | -1.980142 | 0.872912  |
| C | 3.211704  | -1.080522 | -0.283218 |
| H | 4.325477  | -1.511584 | 1.502773  |
| H | 2.671486  | -2.138440 | 1.491732  |
| H | 3.914742  | -2.939923 | 0.496365  |
| C | 2.902620  | 0.374680  | 0.085273  |
| C | 3.578287  | 1.363567  | -0.852401 |
| H | 3.269527  | 0.579992  | 1.093575  |
| O | 4.220226  | 2.301417  | -0.150213 |
| O | 3.169983  | -1.466521 | -1.428505 |

|   |          |          |           |
|---|----------|----------|-----------|
| O | 3.517660 | 1.348435 | -2.057724 |
| C | 4.742801 | 3.405201 | -0.913217 |
| C | 5.154940 | 4.471874 | 0.074923  |
| H | 5.581707 | 3.047731 | -1.517485 |
| H | 3.959362 | 3.755783 | -1.591541 |
| H | 5.561019 | 5.333670 | -0.459342 |
| H | 4.289123 | 4.796645 | 0.657607  |
| H | 5.919183 | 4.094750 | 0.758237  |

Vibrational frequencies

|          |          |          |
|----------|----------|----------|
| 26.9009  | 32.6499  | 40.8837  |
| 43.5874  | 46.8718  | 52.9936  |
| 56.1866  | 63.4498  | 69.8145  |
| 73.8021  | 79.4450  | 89.1787  |
| 94.2667  | 103.3044 | 105.9186 |
| 113.3375 | 115.5734 | 118.4660 |
| 119.2371 | 123.5251 | 137.2057 |
| 155.5303 | 162.6785 | 177.1378 |
| 179.8008 | 183.5694 | 184.7761 |
| 196.6943 | 209.1168 | 215.4415 |
| 218.1845 | 223.5524 | 228.3934 |
| 240.1294 | 253.1561 | 264.6156 |
| 272.3925 | 284.5832 | 286.8319 |
| 294.9120 | 300.3907 | 318.7490 |
| 325.4708 | 332.0304 | 349.8750 |
| 357.4729 | 366.0180 | 368.0225 |
| 399.4139 | 401.9626 | 409.5037 |
| 417.1528 | 427.6716 | 440.8346 |
| 455.3072 | 469.6253 | 484.6241 |
| 494.5914 | 501.3883 | 515.8343 |
| 523.0334 | 529.2832 | 549.0987 |
| 556.6453 | 570.8968 | 575.6585 |
| 581.5200 | 586.7201 | 595.0705 |
| 607.3892 | 626.3260 | 634.7678 |
| 648.3147 | 666.5854 | 675.1677 |
| 695.0677 | 702.8371 | 716.2153 |
| 727.5009 | 750.3092 | 754.1150 |
| 757.2975 | 765.6397 | 780.4345 |
| 781.8936 | 788.8076 | 798.5618 |
| 808.9241 | 822.2667 | 842.1512 |
| 846.6975 | 869.0455 | 871.4595 |
| 877.3457 | 879.0348 | 889.7806 |
| 899.7956 | 916.5439 | 921.1541 |
| 922.2078 | 946.4745 | 954.6399 |
| 956.2538 | 971.4208 | 977.7771 |

|           |           |           |
|-----------|-----------|-----------|
| 983.5040  | 987.5930  | 998.5427  |
| 1004.4303 | 1014.6848 | 1016.2686 |
| 1017.1584 | 1021.2188 | 1027.8373 |
| 1039.0001 | 1045.6865 | 1046.7399 |
| 1053.8595 | 1056.5670 | 1064.3525 |
| 1066.6499 | 1067.4604 | 1068.3923 |
| 1070.7732 | 1073.7389 | 1081.0475 |
| 1103.1462 | 1116.3536 | 1117.4039 |
| 1127.5140 | 1153.0897 | 1171.2548 |
| 1174.8289 | 1178.8742 | 1180.5259 |
| 1183.6525 | 1188.6471 | 1192.9269 |
| 1193.4022 | 1207.6574 | 1207.8833 |
| 1219.7606 | 1237.6714 | 1255.5296 |
| 1264.2836 | 1269.7575 | 1282.3009 |
| 1288.9385 | 1302.0553 | 1302.7805 |
| 1309.4983 | 1318.7792 | 1329.1321 |
| 1333.0979 | 1334.4364 | 1342.4255 |
| 1350.6377 | 1360.0556 | 1367.5088 |
| 1375.0678 | 1381.8010 | 1382.2007 |
| 1385.4150 | 1397.6749 | 1402.1916 |
| 1410.0143 | 1413.5564 | 1415.3392 |
| 1419.6215 | 1429.9709 | 1447.5460 |
| 1453.7689 | 1457.3445 | 1465.7165 |
| 1471.6853 | 1473.3587 | 1477.0486 |
| 1490.1864 | 1492.0706 | 1492.4616 |
| 1493.9197 | 1495.6272 | 1497.6832 |
| 1501.7894 | 1503.3451 | 1504.8971 |
| 1514.9743 | 1519.3944 | 1522.9976 |
| 1531.1693 | 1539.7001 | 1541.8989 |
| 1556.4777 | 1673.8408 | 1679.1518 |
| 1684.6817 | 1687.5355 | 1689.4421 |
| 1699.7795 | 1711.8789 | 1732.5012 |
| 1846.2739 | 1882.6087 | 2407.9393 |
| 3063.9956 | 3066.2834 | 3072.2318 |
| 3077.4966 | 3080.0173 | 3080.1043 |
| 3090.1667 | 3095.4540 | 3100.6580 |
| 3120.3947 | 3133.6553 | 3139.8526 |
| 3142.1176 | 3143.1181 | 3150.1904 |
| 3152.2351 | 3152.6775 | 3167.1092 |
| 3171.6538 | 3171.8106 | 3172.1560 |
| 3187.7757 | 3190.2250 | 3197.1025 |
| 3198.3375 | 3201.9963 | 3203.8965 |
| 3204.0474 | 3211.6411 | 3214.3230 |
| 3216.4854 | 3219.6260 | 3221.2679 |



3229.8035

3238.2493

3260.1296

**TS6R**

Zero-point correction= 0.844437

Thermal correction to Energy= 0.895845

Thermal correction to Enthalpy= 0.896789

Thermal correction to Gibbs Free Energy= 0.757795

Sum of electronic and zero-point Energies= -2407.658661

Sum of electronic and thermal Energies= -2407.607253

Sum of electronic and thermal Enthalpies= -2407.606309

Sum of electronic and thermal Free Energies= -2407.745303

## Cartesian coordinates

|   |           |           |           |
|---|-----------|-----------|-----------|
| C | 0.847274  | 0.857491  | 0.438665  |
| C | -0.047359 | 0.410652  | -0.600240 |
| C | 0.044748  | -0.937187 | -1.346137 |
| O | 0.966185  | 2.037704  | 0.761589  |
| C | -0.979755 | -2.026421 | -0.975934 |
| C | -0.711238 | -3.366105 | -1.269437 |
| C | -2.259529 | -1.672785 | -0.549899 |
| C | -1.698076 | -4.335411 | -1.119097 |
| H | 0.274676  | -3.660416 | -1.622199 |
| C | -3.252816 | -2.640172 | -0.415099 |
| H | -2.506627 | -0.633118 | -0.373440 |
| C | -2.975565 | -3.975811 | -0.694041 |
| H | -1.468776 | -5.371932 | -1.344669 |
| H | -4.245861 | -2.341987 | -0.091109 |
| H | -3.748727 | -4.730004 | -0.586544 |
| C | 1.415238  | -1.481489 | -1.225101 |
| N | 2.504986  | -1.861427 | -1.129616 |
| H | -0.091171 | 1.226094  | -1.325993 |
| C | 1.712130  | -0.076082 | 1.274248  |
| C | 3.467787  | -0.881866 | 2.274640  |
| C | 3.842404  | 1.339355  | 1.163296  |
| H | 3.264610  | 2.198425  | 1.513868  |
| N | 2.497912  | -1.691895 | 2.585612  |
| N | 1.407867  | -1.175515 | 1.956446  |
| N | 3.023184  | 0.147037  | 1.488646  |
| C | 4.901379  | -0.953749 | 2.701741  |
| H | 5.272086  | -1.971789 | 2.576955  |
| H | 4.979673  | -0.672732 | 3.761196  |
| C | 5.195986  | 1.235485  | 1.917950  |
| O | 5.663281  | -0.103767 | 1.883466  |
| C | 5.583733  | 1.957722  | -0.320018 |
| C | 4.257260  | 1.524079  | -0.280705 |

|   |           |           |           |
|---|-----------|-----------|-----------|
| C | 3.499337  | 1.444532  | -1.442014 |
| C | 4.098375  | 1.775879  | -2.655845 |
| C | 5.431889  | 2.182044  | -2.701702 |
| C | 6.182820  | 2.280933  | -1.531375 |
| C | 6.160921  | 2.063948  | 1.070173  |
| H | 2.456788  | 1.150296  | -1.427223 |
| H | 5.884894  | 2.434643  | -3.654944 |
| H | 7.216632  | 2.610878  | -1.563467 |
| H | 6.165800  | 3.104966  | 1.409613  |
| H | 7.175819  | 1.670844  | 1.163274  |
| C | 0.111777  | -1.746624 | 2.210887  |
| C | -0.858661 | -0.944919 | 2.823056  |
| C | -0.071933 | -3.110771 | 1.943577  |
| C | -2.092686 | -1.543178 | 3.088943  |
| C | -1.320866 | -3.647411 | 2.233830  |
| C | -2.346302 | -2.879674 | 2.789317  |
| H | -2.862220 | -0.951775 | 3.579435  |
| H | -1.500647 | -4.697045 | 2.015006  |
| C | 1.024270  | -3.990788 | 1.404260  |
| H | 1.684949  | -4.310254 | 2.215284  |
| H | 1.642637  | -3.477725 | 0.664617  |
| H | 0.589551  | -4.877835 | 0.940251  |
| C | -3.687227 | -3.502974 | 3.065371  |
| H | -3.592379 | -4.337754 | 3.765450  |
| H | -4.114935 | -3.900030 | 2.139073  |
| H | -4.386755 | -2.778406 | 3.485964  |
| C | -0.598433 | 0.473423  | 3.267814  |
| H | -0.701961 | 1.201488  | 2.458520  |
| H | 0.407184  | 0.584762  | 3.685092  |
| H | -1.315478 | 0.746407  | 4.044171  |
| H | 5.111745  | 1.576566  | 2.957070  |
| H | 3.505343  | 1.739922  | -3.563000 |
| C | -0.182453 | -0.714165 | -2.904734 |
| C | 0.863425  | 0.193526  | -3.568294 |
| C | -1.599830 | -0.187818 | -3.098026 |
| H | -0.131380 | -1.702248 | -3.364915 |
| C | 1.828940  | -0.501564 | -4.489027 |
| O | 0.902163  | 1.384225  | -3.345241 |
| O | -2.374954 | -1.129626 | -3.627667 |
| O | -1.980598 | 0.911010  | -2.770679 |
| H | 1.284185  | -1.101756 | -5.223229 |
| H | 2.461546  | 0.226051  | -4.995440 |
| H | 2.449086  | -1.188971 | -3.901259 |
| C | -3.784699 | -0.829549 | -3.687805 |

|   |           |           |           |
|---|-----------|-----------|-----------|
| C | -4.491430 | -2.112772 | -4.057887 |
| H | -4.095873 | -0.456189 | -2.707126 |
| H | -3.940930 | -0.035312 | -4.422708 |
| H | -4.298559 | -2.878441 | -3.302004 |
| H | -5.567869 | -1.937775 | -4.114552 |
| H | -4.146976 | -2.479244 | -5.027244 |
| C | -3.238824 | 1.347968  | 1.180663  |
| C | -4.198684 | 2.265755  | 1.536474  |
| C | -4.130970 | 3.586428  | 1.017300  |
| C | -3.050521 | 3.866187  | 0.140360  |
| C | -2.142798 | 2.877126  | -0.154895 |
| H | -3.268548 | 0.331762  | 1.566132  |
| H | -4.991369 | 1.960797  | 2.205886  |
| H | -2.920729 | 4.843454  | -0.303561 |
| H | -1.305467 | 3.066219  | -0.820104 |
| C | -4.938511 | 5.864638  | 0.780602  |
| C | -6.134105 | 4.199003  | 2.248051  |
| H | -4.994086 | 5.841621  | -0.312638 |
| H | -5.762963 | 6.468908  | 1.153029  |
| H | -3.998592 | 6.342681  | 1.075825  |
| H | -6.761042 | 3.397592  | 1.843272  |
| H | -5.752730 | 3.887897  | 3.226290  |
| H | -6.754168 | 5.082163  | 2.386735  |
| N | -5.044462 | 4.524259  | 1.339389  |
| N | -2.222779 | 1.636781  | 0.350916  |
| H | -1.234500 | 0.825948  | -0.039593 |

Vibrational frequencies

|            |          |          |
|------------|----------|----------|
| -1240.5893 | 13.0756  | 19.9730  |
| 24.5550    | 30.4163  | 32.2180  |
| 37.9062    | 42.7293  | 47.9883  |
| 55.4103    | 59.7211  | 64.7001  |
| 71.3567    | 73.9621  | 74.9173  |
| 79.5961    | 82.6032  | 91.4910  |
| 92.8778    | 100.5081 | 104.4866 |
| 105.7207   | 110.3623 | 113.3763 |
| 121.5550   | 128.2693 | 132.5456 |
| 134.4836   | 136.8284 | 141.8119 |
| 145.3989   | 148.5956 | 158.2645 |
| 165.9067   | 174.2946 | 183.5975 |
| 184.4735   | 201.6280 | 204.4864 |
| 206.7345   | 208.6541 | 218.9708 |
| 223.5729   | 240.3301 | 252.0894 |
| 260.2831   | 266.8971 | 271.7170 |
| 279.3239   | 283.6769 | 287.3894 |

|           |           |           |
|-----------|-----------|-----------|
| 293.4944  | 294.6003  | 299.3457  |
| 315.2774  | 327.0221  | 343.3833  |
| 353.3162  | 364.3822  | 370.2629  |
| 379.9309  | 391.3000  | 402.1533  |
| 414.6990  | 416.3119  | 426.1640  |
| 431.9663  | 435.2352  | 443.2825  |
| 463.3855  | 481.2885  | 485.8285  |
| 490.9059  | 500.8464  | 505.6583  |
| 516.8554  | 520.5543  | 531.5423  |
| 543.4224  | 550.3332  | 560.9280  |
| 564.6197  | 569.1590  | 579.5606  |
| 584.6493  | 589.4578  | 610.5768  |
| 625.3789  | 633.3285  | 637.7797  |
| 654.6268  | 666.0925  | 671.6230  |
| 685.7690  | 692.2820  | 706.1207  |
| 720.7691  | 726.3877  | 744.8193  |
| 745.5836  | 752.0165  | 759.3077  |
| 765.6780  | 776.7421  | 780.9716  |
| 786.3792  | 803.6548  | 807.4201  |
| 812.3579  | 840.4846  | 842.2528  |
| 847.6027  | 853.4715  | 867.0458  |
| 881.1417  | 881.7384  | 885.4577  |
| 891.7527  | 898.7146  | 919.0805  |
| 922.7335  | 928.7217  | 952.0412  |
| 956.4088  | 959.3282  | 966.5201  |
| 975.4685  | 981.5809  | 982.7593  |
| 986.5964  | 988.4606  | 991.5090  |
| 1006.4094 | 1010.8850 | 1014.2796 |
| 1015.9882 | 1023.7740 | 1025.3033 |
| 1030.9418 | 1031.6460 | 1036.3366 |
| 1042.0342 | 1047.1880 | 1049.1636 |
| 1055.4649 | 1061.4243 | 1062.4252 |
| 1063.9192 | 1068.8574 | 1069.4870 |
| 1073.0317 | 1077.1041 | 1086.2380 |
| 1093.5197 | 1097.6826 | 1111.7627 |
| 1121.5961 | 1126.3760 | 1136.8639 |
| 1139.7252 | 1143.6186 | 1151.6323 |
| 1154.9777 | 1167.9437 | 1178.0202 |
| 1178.5701 | 1182.3141 | 1186.0083 |
| 1188.4702 | 1194.6464 | 1206.2001 |
| 1213.3977 | 1215.3765 | 1216.5323 |
| 1228.5566 | 1237.0406 | 1251.8235 |
| 1255.3724 | 1261.5707 | 1271.6531 |
| 1281.5524 | 1289.3209 | 1290.3859 |

|           |           |           |
|-----------|-----------|-----------|
| 1297.3449 | 1306.6402 | 1309.8900 |
| 1321.1487 | 1337.2274 | 1340.7464 |
| 1341.3085 | 1349.5145 | 1356.7432 |
| 1363.6523 | 1365.8921 | 1366.7820 |
| 1376.2199 | 1376.7668 | 1378.0692 |
| 1382.9263 | 1387.0372 | 1390.9800 |
| 1398.9998 | 1413.8034 | 1415.3477 |
| 1419.7827 | 1423.3766 | 1428.9731 |
| 1437.7941 | 1444.6702 | 1446.0810 |
| 1452.0309 | 1455.7521 | 1461.1330 |
| 1466.4787 | 1474.0661 | 1474.8544 |
| 1475.8227 | 1488.9462 | 1489.7466 |
| 1491.8053 | 1491.8890 | 1492.3668 |
| 1493.1036 | 1498.2572 | 1500.8223 |
| 1500.9390 | 1503.4694 | 1503.9404 |
| 1507.9777 | 1517.2677 | 1520.3716 |
| 1522.5703 | 1525.0634 | 1528.0820 |
| 1536.1004 | 1536.8961 | 1537.5442 |
| 1548.6163 | 1595.4736 | 1601.7261 |
| 1607.9837 | 1666.4748 | 1675.0157 |
| 1680.3506 | 1681.3637 | 1685.8578 |
| 1692.4506 | 1693.6808 | 1706.3203 |
| 1713.2573 | 1746.6265 | 1840.1159 |
| 1873.8671 | 2396.3553 | 3056.1235 |
| 3063.5015 | 3067.5984 | 3070.9371 |
| 3072.8538 | 3076.5457 | 3080.2206 |
| 3081.0055 | 3090.9223 | 3096.6593 |
| 3099.7018 | 3123.0068 | 3128.4900 |
| 3139.4584 | 3140.9199 | 3144.3306 |
| 3146.6848 | 3148.0471 | 3151.3668 |
| 3153.6384 | 3155.1769 | 3155.9105 |
| 3165.9150 | 3168.3467 | 3172.4038 |
| 3174.9533 | 3175.6042 | 3178.3394 |
| 3189.1418 | 3194.1591 | 3195.2317 |
| 3197.1751 | 3198.0730 | 3201.4936 |
| 3203.7438 | 3207.7214 | 3207.9249 |
| 3223.8927 | 3225.9862 | 3227.4353 |
| 3241.0123 | 3242.5340 | 3257.6834 |
| 3266.8714 | 3269.0583 | 3282.9296 |

TS6R<sup>b</sup>

Zero-point correction= 0.830803

Thermal correction to Energy= 0.881855

Thermal correction to Enthalpy= 0.882799

Thermal correction to Gibbs Free Energy= 0.744589  
 Sum of electronic and zero-point Energies= -2407.198908  
 Sum of electronic and thermal Energies= -2407.147856  
 Sum of electronic and thermal Enthalpies= -2407.146912  
 Sum of electronic and thermal Free Energies= -2407.285122

Cartesian coordinates

|   |           |           |           |
|---|-----------|-----------|-----------|
| C | -2.244893 | 0.409058  | 1.462914  |
| C | -0.915362 | 0.303439  | 1.754132  |
| C | 0.322447  | 0.201569  | 0.874473  |
| O | -3.229043 | 0.434212  | 2.279979  |
| C | 0.956552  | 1.561106  | 0.471338  |
| C | 1.850538  | 1.638658  | -0.600510 |
| C | 0.738356  | 2.699986  | 1.245326  |
| C | 2.547734  | 2.815595  | -0.864485 |
| H | 2.003604  | 0.773137  | -1.239984 |
| C | 1.444927  | 3.872341  | 0.992527  |
| H | 0.029890  | 2.648031  | 2.064274  |
| C | 2.361625  | 3.932871  | -0.054437 |
| H | 3.238534  | 2.853583  | -1.701780 |
| H | 1.269433  | 4.745169  | 1.615273  |
| H | 2.912504  | 4.848556  | -0.249285 |
| C | -0.011926 | -0.499494 | -0.388925 |
| N | -0.276304 | -0.977671 | -1.410874 |
| C | -2.776250 | 0.511584  | 0.037756  |
| C | -4.141695 | 0.196215  | -1.647613 |
| C | -4.463465 | -1.380082 | 0.262069  |
| H | -4.617931 | -0.994113 | 1.275004  |
| N | -3.503837 | 1.289594  | -1.937686 |
| N | -2.663408 | 1.481046  | -0.874580 |
| N | -3.738091 | -0.309999 | -0.444169 |
| C | -5.264891 | -0.434690 | -2.413401 |
| H | -4.975270 | -0.577091 | -3.455826 |
| H | -6.134342 | 0.236954  | -2.378070 |
| C | -5.799664 | -1.655864 | -0.469056 |
| O | -5.569491 | -1.695607 | -1.872921 |
| C | -4.797340 | -3.722591 | 0.131796  |
| C | -3.813804 | -2.743271 | 0.286189  |
| C | -2.484929 | -3.074194 | 0.492474  |
| C | -2.141045 | -4.426986 | 0.527032  |
| C | -3.114991 | -5.412660 | 0.367041  |
| C | -4.454316 | -5.067276 | 0.172117  |
| C | -6.155054 | -3.083502 | -0.049927 |
| H | -1.716622 | -2.321466 | 0.630677  |
| H | -2.831065 | -6.460358 | 0.394368  |

|   |           |           |           |
|---|-----------|-----------|-----------|
| H | -5.211245 | -5.835948 | 0.046281  |
| H | -6.715320 | -3.070060 | 0.891517  |
| H | -6.776395 | -3.562067 | -0.810584 |
| C | -2.001084 | 2.758331  | -0.782478 |
| C | -2.480506 | 3.673469  | 0.161473  |
| C | -1.037069 | 3.085891  | -1.741217 |
| C | -1.880515 | 4.932747  | 0.187204  |
| C | -0.488439 | 4.363110  | -1.680670 |
| C | -0.880061 | 5.289467  | -0.714203 |
| H | -2.225988 | 5.659148  | 0.918563  |
| H | 0.279434  | 4.634665  | -2.401331 |
| C | -0.641061 | 2.137476  | -2.839414 |
| H | -1.367189 | 2.183463  | -3.657769 |
| H | -0.599925 | 1.104235  | -2.492036 |
| H | 0.339988  | 2.412795  | -3.232435 |
| C | -0.210031 | 6.634837  | -0.641808 |
| H | -0.091973 | 7.073838  | -1.635899 |
| H | 0.791827  | 6.528976  | -0.209912 |
| H | -0.775094 | 7.330854  | -0.018359 |
| C | -3.650782 | 3.364035  | 1.058485  |
| H | -3.441110 | 2.572705  | 1.783496  |
| H | -4.506410 | 3.027733  | 0.460831  |
| H | -3.951607 | 4.265050  | 1.595861  |
| H | -6.570790 | -0.910857 | -0.234764 |
| H | -1.101741 | -4.691966 | 0.688872  |
| C | 1.448249  | -0.613908 | 1.579396  |
| C | 1.221414  | -2.042094 | 1.786933  |
| C | 2.120104  | 0.109044  | 2.682034  |
| H | 2.579006  | -0.840697 | 0.633418  |
| C | 2.141860  | -2.827147 | 2.710461  |
| O | 0.359802  | -2.662281 | 1.161642  |
| O | 3.398832  | -0.319083 | 2.847445  |
| O | 1.663407  | 0.995367  | 3.375792  |
| H | 2.137171  | -2.421214 | 3.725754  |
| H | 1.795029  | -3.860201 | 2.724458  |
| H | 3.173999  | -2.784264 | 2.352467  |
| C | 4.092409  | 0.196305  | 3.990862  |
| C | 5.442484  | -0.485622 | 4.036632  |
| H | 4.183120  | 1.282116  | 3.894589  |
| H | 3.501735  | -0.010120 | 4.889045  |
| H | 6.014225  | -0.272634 | 3.129776  |
| H | 6.013408  | -0.129355 | 4.897063  |
| H | 5.321213  | -1.568230 | 4.124079  |
| C | 4.655647  | -0.461095 | -0.138220 |

|   |           |           |           |
|---|-----------|-----------|-----------|
| C | 5.656393  | -0.731640 | -1.039632 |
| C | 5.459610  | -1.735637 | -2.026752 |
| C | 4.206510  | -2.404844 | -2.017049 |
| C | 3.264102  | -2.063503 | -1.076701 |
| H | 4.762804  | 0.296278  | 0.631534  |
| H | 6.579533  | -0.171928 | -0.980253 |
| H | 3.973192  | -3.179622 | -2.733983 |
| H | 2.290106  | -2.543588 | -1.035587 |
| C | 6.174987  | -3.064369 | -3.931392 |
| C | 7.688404  | -1.329962 | -2.903956 |
| H | 5.314520  | -2.809607 | -4.558479 |
| H | 7.052263  | -3.146535 | -4.569564 |
| H | 5.994293  | -4.037887 | -3.463793 |
| H | 7.549101  | -0.257346 | -3.074903 |
| H | 8.198389  | -1.470650 | -1.945368 |
| H | 8.326380  | -1.723664 | -3.692297 |
| N | 6.415821  | -2.036261 | -2.928747 |
| N | 3.483893  | -1.114201 | -0.152568 |
| H | -0.700321 | 0.265540  | 2.817021  |

Vibrational frequencies

|           |          |          |
|-----------|----------|----------|
| -925.8465 | 9.2425   | 14.4907  |
| 27.3900   | 32.6998  | 35.2653  |
| 43.2605   | 46.4082  | 49.8799  |
| 53.6560   | 57.5047  | 61.9299  |
| 67.8505   | 73.8095  | 77.9358  |
| 81.7624   | 87.2922  | 94.2766  |
| 95.9002   | 99.7342  | 105.7701 |
| 108.8092  | 114.6122 | 118.3135 |
| 123.9891  | 127.8193 | 132.5186 |
| 136.6162  | 149.0798 | 154.6475 |
| 158.6810  | 167.7997 | 172.0914 |
| 177.7782  | 186.4427 | 187.7761 |
| 199.6405  | 202.9467 | 204.2813 |
| 212.1270  | 226.4020 | 228.9294 |
| 238.2405  | 242.8063 | 258.6161 |
| 263.5694  | 267.2925 | 270.3601 |
| 275.9116  | 285.9106 | 288.2364 |
| 293.3177  | 297.2805 | 310.8145 |
| 316.1590  | 327.9770 | 336.0857 |
| 346.3485  | 355.9497 | 366.7440 |
| 389.0123  | 398.7610 | 402.8521 |
| 412.0801  | 425.7690 | 428.6183 |
| 432.2167  | 434.0776 | 443.1355 |
| 458.5529  | 484.2275 | 489.2179 |



|           |           |           |
|-----------|-----------|-----------|
| 491.3006  | 494.8855  | 502.2056  |
| 515.4144  | 525.3566  | 535.1740  |
| 537.2914  | 552.7228  | 559.1853  |
| 573.7724  | 580.0276  | 585.2623  |
| 588.3702  | 594.0569  | 596.0983  |
| 608.4326  | 624.3877  | 636.1716  |
| 650.7415  | 666.2065  | 667.8850  |
| 677.7326  | 703.6604  | 709.7756  |
| 720.6181  | 726.9237  | 741.3618  |
| 743.9987  | 754.1151  | 755.8859  |
| 775.8342  | 778.0660  | 785.0826  |
| 794.0455  | 802.3754  | 808.4785  |
| 812.9289  | 822.0959  | 834.1995  |
| 837.6311  | 844.0927  | 848.5989  |
| 871.5317  | 872.3096  | 877.8228  |
| 882.4228  | 884.8456  | 908.3162  |
| 911.3700  | 913.9965  | 932.9977  |
| 948.2148  | 960.6869  | 969.1236  |
| 979.4931  | 985.6632  | 986.2779  |
| 991.3991  | 993.1731  | 997.8185  |
| 1000.1527 | 1011.4626 | 1016.0339 |
| 1017.7698 | 1020.6087 | 1037.7285 |
| 1038.2072 | 1039.1682 | 1041.9892 |
| 1046.8149 | 1053.5479 | 1061.9346 |
| 1064.1650 | 1065.0578 | 1066.3093 |
| 1067.5298 | 1068.1485 | 1074.8014 |
| 1076.3792 | 1078.9160 | 1082.5018 |
| 1095.7601 | 1110.3454 | 1117.1173 |
| 1129.1015 | 1137.0191 | 1146.2617 |
| 1150.0361 | 1153.2716 | 1160.8048 |
| 1165.1123 | 1166.5995 | 1170.6283 |
| 1177.0385 | 1183.5108 | 1189.0043 |
| 1193.8681 | 1198.9119 | 1202.6067 |
| 1205.2669 | 1214.7149 | 1215.4161 |
| 1236.1833 | 1253.4596 | 1255.0759 |
| 1268.3098 | 1278.6555 | 1281.5508 |
| 1285.4280 | 1286.2148 | 1291.4169 |
| 1298.9136 | 1302.1233 | 1322.2707 |
| 1330.3712 | 1336.0202 | 1337.1025 |
| 1341.4607 | 1346.0541 | 1356.8406 |
| 1359.9247 | 1361.6873 | 1372.3800 |
| 1377.0869 | 1381.2996 | 1385.2061 |
| 1385.3640 | 1390.1512 | 1399.7344 |
| 1408.1718 | 1416.9154 | 1417.6195 |

|           |           |           |
|-----------|-----------|-----------|
| 1424.1595 | 1439.2617 | 1440.6404 |
| 1445.5796 | 1449.9694 | 1455.7932 |
| 1468.8042 | 1470.0442 | 1473.2476 |
| 1477.9599 | 1491.0898 | 1492.5019 |
| 1493.0475 | 1493.2502 | 1493.6837 |
| 1495.0494 | 1496.4969 | 1497.2556 |
| 1499.2291 | 1500.7930 | 1502.0042 |
| 1502.9236 | 1503.8667 | 1508.6045 |
| 1514.8093 | 1524.0137 | 1524.4520 |
| 1532.4109 | 1535.9095 | 1538.9574 |
| 1540.7074 | 1541.2535 | 1565.8827 |
| 1591.6537 | 1609.8225 | 1671.2800 |
| 1673.3286 | 1679.5129 | 1681.3555 |
| 1686.5593 | 1689.6037 | 1698.7802 |
| 1709.6594 | 1712.0730 | 1715.5935 |
| 1743.5651 | 1819.3780 | 2385.7262 |
| 3058.6871 | 3061.0185 | 3061.8072 |
| 3067.5956 | 3069.1588 | 3072.9634 |
| 3074.5174 | 3078.1529 | 3079.7697 |
| 3094.7604 | 3096.6252 | 3116.7194 |
| 3129.9609 | 3133.0550 | 3133.4841 |
| 3138.7979 | 3141.8472 | 3143.4961 |
| 3146.3453 | 3152.0899 | 3162.2362 |
| 3164.7452 | 3166.5743 | 3166.6044 |
| 3167.9288 | 3185.2892 | 3187.8688 |
| 3188.7379 | 3189.5434 | 3190.9285 |
| 3193.8843 | 3200.0638 | 3202.1910 |
| 3202.6697 | 3211.7600 | 3214.2626 |
| 3214.5670 | 3224.4802 | 3226.4386 |
| 3233.2536 | 3238.1962 | 3246.5853 |
| 3264.7240 | 3265.0795 | 3267.3956 |

TS6R<sup>c</sup>

Zero-point correction= 0.665346

Thermal correction to Energy= 0.706230

Thermal correction to Enthalpy= 0.707174

Thermal correction to Gibbs Free Energy= 0.593427

Sum of electronic and zero-point Energies= -2025.212414

Sum of electronic and thermal Energies= -2025.171530

Sum of electronic and thermal Enthalpies= -2025.170586

Sum of electronic and thermal Free Energies= -2025.284333

Cartesian coordinates

|   |           |           |          |
|---|-----------|-----------|----------|
| C | 0.090589  | -0.747544 | 1.681977 |
| C | -0.362462 | 0.582126  | 1.482404 |

|   |           |           |           |
|---|-----------|-----------|-----------|
| C | -0.738546 | 1.315778  | 0.170574  |
| O | 0.522909  | -1.216273 | 2.743683  |
| C | -2.206908 | 1.523186  | -0.189073 |
| C | -2.535363 | 1.971622  | -1.471830 |
| C | -3.220259 | 1.317508  | 0.744126  |
| C | -3.863197 | 2.209481  | -1.814659 |
| H | -1.740476 | 2.145687  | -2.192859 |
| C | -4.545745 | 1.575834  | 0.405911  |
| H | -2.970886 | 0.969586  | 1.740390  |
| C | -4.873096 | 2.017837  | -0.873119 |
| H | -4.107067 | 2.554371  | -2.814745 |
| H | -5.326836 | 1.415637  | 1.143686  |
| H | -5.908629 | 2.214345  | -1.134808 |
| C | -0.058615 | 0.615630  | -0.937753 |
| N | 0.512945  | 0.029167  | -1.755653 |
| C | 0.167184  | -1.749602 | 0.538900  |
| C | 0.917520  | -3.320251 | -0.767032 |
| C | 2.629629  | -2.337625 | 0.786616  |
| H | 2.480669  | -2.368688 | 1.870028  |
| N | -0.361896 | -3.268276 | -1.001159 |
| N | -0.819424 | -2.288011 | -0.172851 |
| N | 1.281949  | -2.416559 | 0.193215  |
| C | 1.932609  | -4.256580 | -1.347522 |
| H | 1.806064  | -4.320528 | -2.428853 |
| H | 1.789361  | -5.255518 | -0.912540 |
| C | 3.464340  | -3.549583 | 0.297052  |
| O | 3.223431  | -3.763403 | -1.086538 |
| C | 4.798879  | -1.581816 | 0.199707  |
| C | 3.483988  | -1.152299 | 0.386353  |
| C | 3.151345  | 0.190988  | 0.284514  |
| C | 4.150599  | 1.108154  | -0.036597 |
| C | 5.462931  | 0.681416  | -0.236987 |
| C | 5.796954  | -0.667729 | -0.114703 |
| C | 4.911975  | -3.072021 | 0.419654  |
| H | 2.136551  | 0.533879  | 0.440403  |
| H | 6.231991  | 1.405230  | -0.487463 |
| H | 6.819583  | -0.999395 | -0.267075 |
| H | 5.299141  | -3.291850 | 1.420395  |
| H | 5.543353  | -3.582928 | -0.310727 |
| C | -2.232902 | -2.010095 | -0.103338 |
| C | -2.895547 | -2.216688 | 1.113588  |
| C | -2.901938 | -1.630108 | -1.278258 |
| C | -4.268966 | -1.968822 | 1.143693  |
| C | -4.270755 | -1.401354 | -1.181983 |

|   |           |           |           |
|---|-----------|-----------|-----------|
| C | -4.969688 | -1.557322 | 0.014612  |
| H | -4.800649 | -2.117535 | 2.080200  |
| H | -4.805931 | -1.082062 | -2.073282 |
| C | -2.237522 | -1.513853 | -2.625458 |
| H | -2.376518 | -2.442864 | -3.187465 |
| H | -1.169571 | -1.318933 | -2.559412 |
| H | -2.703099 | -0.701632 | -3.189081 |
| C | -6.450349 | -1.292463 | 0.064735  |
| H | -7.002148 | -2.063908 | -0.481164 |
| H | -6.679122 | -0.329916 | -0.402492 |
| H | -6.817419 | -1.274971 | 1.092955  |
| C | -2.219941 | -2.720422 | 2.363841  |
| H | -1.914157 | -1.895814 | 3.013925  |
| H | -1.327688 | -3.313380 | 2.150523  |
| H | -2.917573 | -3.346269 | 2.923533  |
| H | 3.242119  | -4.461992 | 0.864166  |
| H | 3.892526  | 2.159371  | -0.118104 |
| C | 0.104168  | 2.600757  | 0.480131  |
| C | -0.438166 | 3.496280  | 1.510551  |
| C | 0.886901  | 3.188032  | -0.623994 |
| H | 0.612966  | 1.568381  | 1.384760  |
| C | 0.218950  | 4.844733  | 1.750581  |
| O | -1.381835 | 3.157743  | 2.223389  |
| O | 1.988182  | 3.836493  | -0.189333 |
| O | 0.620875  | 3.097626  | -1.808076 |
| H | 0.220909  | 5.455446  | 0.843687  |
| H | -0.342702 | 5.350445  | 2.535618  |
| H | 1.259916  | 4.719422  | 2.055263  |
| C | 2.736134  | 4.536777  | -1.196119 |
| C | 3.843282  | 5.286410  | -0.488344 |
| H | 3.124971  | 3.809793  | -1.915953 |
| H | 2.063718  | 5.211714  | -1.733999 |
| H | 4.501652  | 4.597363  | 0.047373  |
| H | 4.441447  | 5.838987  | -1.216247 |
| H | 3.427358  | 5.996025  | 0.230911  |
| H | -0.815396 | 1.032525  | 2.362102  |

Vibrational frequencies

|            |          |          |
|------------|----------|----------|
| -1572.3543 | 25.6552  | 33.9521  |
| 37.4125    | 41.1093  | 48.2799  |
| 53.5132    | 56.6627  | 67.4641  |
| 72.2056    | 80.3456  | 84.7488  |
| 86.0428    | 96.3592  | 98.3831  |
| 105.9742   | 107.7507 | 114.5350 |
| 129.2639   | 131.3336 | 141.2381 |

|           |           |           |
|-----------|-----------|-----------|
| 144.4800  | 156.8301  | 160.2670  |
| 165.3086  | 182.1855  | 188.9557  |
| 197.9676  | 207.3354  | 211.5125  |
| 215.0715  | 222.3817  | 228.0064  |
| 237.9947  | 243.8267  | 248.9814  |
| 270.5620  | 282.7140  | 290.1659  |
| 294.0823  | 304.8453  | 308.0530  |
| 318.6437  | 327.5446  | 349.4564  |
| 350.7435  | 357.1436  | 364.4478  |
| 391.3921  | 396.0999  | 401.0126  |
| 407.1010  | 414.0754  | 434.8885  |
| 449.2839  | 459.0195  | 485.1359  |
| 491.9948  | 501.3697  | 510.4299  |
| 517.7887  | 523.9894  | 527.5355  |
| 536.9557  | 559.4382  | 575.2069  |
| 583.5330  | 585.6339  | 603.9749  |
| 606.4743  | 625.8184  | 632.2461  |
| 634.4675  | 642.7222  | 649.5557  |
| 693.7071  | 698.5385  | 707.4138  |
| 712.1083  | 726.8583  | 738.0419  |
| 746.5240  | 754.9961  | 762.4418  |
| 773.5227  | 787.6749  | 790.8529  |
| 808.4943  | 817.6575  | 828.9081  |
| 844.3919  | 860.0360  | 865.2940  |
| 873.1799  | 880.5338  | 882.2631  |
| 882.8251  | 898.3378  | 916.0377  |
| 917.1690  | 919.3185  | 942.3788  |
| 956.4233  | 969.1930  | 972.7048  |
| 980.8801  | 983.9619  | 993.5262  |
| 998.1838  | 1018.0668 | 1018.8449 |
| 1020.9115 | 1025.4406 | 1039.4235 |
| 1043.4035 | 1044.7090 | 1049.7051 |
| 1052.0301 | 1057.5519 | 1061.5719 |
| 1062.6717 | 1064.9584 | 1065.8990 |
| 1067.9541 | 1070.7412 | 1073.8347 |
| 1082.8007 | 1115.0075 | 1116.0543 |
| 1139.8176 | 1150.9122 | 1161.9926 |
| 1172.4272 | 1173.8778 | 1178.3404 |
| 1181.6879 | 1187.4409 | 1191.5797 |
| 1206.9010 | 1210.9186 | 1219.2617 |
| 1236.1777 | 1240.5503 | 1251.2964 |
| 1255.4825 | 1271.7713 | 1287.4343 |
| 1289.6434 | 1292.1738 | 1303.3338 |
| 1306.4737 | 1316.5831 | 1326.8496 |

|           |           |           |
|-----------|-----------|-----------|
| 1337.3005 | 1341.4645 | 1343.2492 |
| 1346.6381 | 1356.4670 | 1362.6663 |
| 1366.0780 | 1377.5955 | 1379.8884 |
| 1390.1741 | 1399.9367 | 1403.6083 |
| 1414.0223 | 1417.6568 | 1417.7923 |
| 1421.5764 | 1429.8522 | 1442.3731 |
| 1459.0015 | 1467.1386 | 1468.5345 |
| 1472.7905 | 1474.0698 | 1484.0640 |
| 1489.8046 | 1491.5734 | 1493.4674 |
| 1498.1115 | 1500.4485 | 1503.5978 |
| 1509.2442 | 1516.6316 | 1516.7876 |
| 1519.7082 | 1526.8736 | 1531.2052 |
| 1535.5920 | 1539.0910 | 1549.3005 |
| 1588.1422 | 1671.1650 | 1677.2080 |
| 1684.4948 | 1686.3217 | 1693.7286 |
| 1698.5491 | 1706.8452 | 1708.6156 |
| 1737.8693 | 1744.1440 | 1801.7689 |
| 2403.3740 | 3068.4741 | 3069.1879 |
| 3076.3949 | 3077.0880 | 3079.3826 |
| 3084.8524 | 3086.5230 | 3094.3311 |
| 3096.3693 | 3130.6841 | 3139.5102 |
| 3141.0691 | 3148.4071 | 3149.5639 |
| 3153.3203 | 3161.0794 | 3162.3370 |
| 3163.3551 | 3169.7864 | 3173.0513 |
| 3178.9557 | 3191.6263 | 3195.7554 |
| 3196.1509 | 3196.9213 | 3199.5892 |
| 3199.7446 | 3208.6913 | 3211.7359 |
| 3214.8453 | 3214.9543 | 3222.0176 |
| 3223.4608 | 3232.9300 | 3265.6952 |

#### TS6R<sup>d</sup>

Zero-point correction= 0.665554

Thermal correction to Energy= 0.705875

Thermal correction to Enthalpy= 0.706820

Thermal correction to Gibbs Free Energy= 0.593998

Sum of electronic and zero-point Energies= -2025.211170

Sum of electronic and thermal Energies= -2025.170848

Sum of electronic and thermal Enthalpies= -2025.169904

Sum of electronic and thermal Free Energies= -2025.282726

Cartesian coordinates

|   |           |           |           |
|---|-----------|-----------|-----------|
| C | -0.769309 | -0.670023 | -1.641229 |
| C | 0.184725  | 0.405749  | -1.683511 |
| C | 0.902924  | 1.078049  | -0.497911 |
| O | -1.383986 | -1.081787 | -2.625594 |

|   |           |           |           |
|---|-----------|-----------|-----------|
| C | 2.348713  | 0.622156  | -0.249029 |
| C | 2.891292  | 0.680176  | 1.040138  |
| C | 3.175512  | 0.242139  | -1.307088 |
| C | 4.229501  | 0.372363  | 1.266367  |
| H | 2.263783  | 0.969871  | 1.878540  |
| C | 4.512123  | -0.073719 | -1.077597 |
| H | 2.798201  | 0.230639  | -2.321753 |
| C | 5.046942  | -0.008109 | 0.206188  |
| H | 4.626224  | 0.423759  | 2.276041  |
| H | 5.139737  | -0.362428 | -1.915134 |
| H | 6.091290  | -0.249832 | 0.377806  |
| C | 0.108246  | 0.887143  | 0.729299  |
| N | -0.560494 | 0.757344  | 1.665608  |
| H | 0.841367  | 0.293831  | -2.548357 |
| C | -1.174748 | -1.387653 | -0.364840 |
| C | -2.395623 | -2.331685 | 1.167036  |
| C | -3.672071 | -0.938223 | -0.491936 |
| H | -3.630614 | -1.192470 | -1.555437 |
| N | -1.194990 | -2.799654 | 1.353950  |
| N | -0.443954 | -2.208796 | 0.383764  |
| N | -2.431837 | -1.475830 | 0.099495  |
| C | -3.653958 | -2.668065 | 1.907127  |
| H | -3.475467 | -2.629763 | 2.982356  |
| H | -3.971965 | -3.683846 | 1.633756  |
| C | -4.885397 | -1.616321 | 0.197887  |
| O | -4.641209 | -1.717392 | 1.593402  |
| C | -5.295999 | 0.718297  | -0.010333 |
| C | -3.940214 | 0.537668  | -0.289973 |
| C | -3.087520 | 1.624062  | -0.431373 |
| C | -3.603652 | 2.906609  | -0.248417 |
| C | -4.954177 | 3.090158  | 0.048204  |
| C | -5.811969 | 1.996567  | 0.161431  |
| C | -6.019717 | -0.606613 | 0.022340  |
| H | -2.039351 | 1.491878  | -0.676102 |
| H | -5.341565 | 4.093854  | 0.189096  |
| H | -6.864483 | 2.141715  | 0.384598  |
| H | -6.543880 | -0.787968 | -0.922074 |
| H | -6.741155 | -0.700903 | 0.836907  |
| C | 0.937250  | -2.581908 | 0.202399  |
| C | 1.323558  | -3.175438 | -1.008387 |
| C | 1.818450  | -2.407407 | 1.277578  |
| C | 2.671698  | -3.500327 | -1.154535 |
| C | 3.147709  | -2.767036 | 1.074208  |
| C | 3.599362  | -3.288255 | -0.137249 |

|   |           |           |           |
|---|-----------|-----------|-----------|
| H | 2.996131  | -3.954840 | -2.087573 |
| H | 3.853904  | -2.621376 | 1.887253  |
| C | 1.381726  | -1.896041 | 2.624779  |
| H | 0.964002  | -2.712743 | 3.221407  |
| H | 0.617376  | -1.121801 | 2.548433  |
| H | 2.242047  | -1.486684 | 3.158741  |
| C | 5.053563  | -3.614240 | -0.341880 |
| H | 5.557922  | -3.791157 | 0.610470  |
| H | 5.558339  | -2.777267 | -0.835705 |
| H | 5.176879  | -4.497051 | -0.973727 |
| C | 0.368366  | -3.539247 | -2.117643 |
| H | 0.390073  | -2.804546 | -2.926415 |
| H | -0.665423 | -3.620759 | -1.776264 |
| H | 0.662825  | -4.504012 | -2.535601 |
| H | -5.096843 | -2.607833 | -0.221087 |
| H | -2.949224 | 3.768234  | -0.336741 |
| C | 0.863143  | 2.686962  | -0.760388 |
| C | 0.851707  | 2.879190  | -2.278284 |
| C | 1.972896  | 3.381078  | -0.002715 |
| H | -0.079426 | 3.046381  | -0.336397 |
| C | -0.465632 | 2.923937  | -2.788331 |
| O | 1.883256  | 2.631132  | -2.923807 |
| O | 1.672560  | 3.405532  | 1.308885  |
| O | 2.981016  | 3.858152  | -0.458077 |
| H | -1.261534 | 3.362267  | -2.194039 |
| H | -0.593237 | 2.935470  | -3.866997 |
| H | -0.433199 | 1.397410  | -2.240698 |
| C | 2.699202  | 3.922854  | 2.171709  |
| C | 2.215626  | 3.750421  | 3.594049  |
| H | 3.623293  | 3.368340  | 1.977555  |
| H | 2.876078  | 4.972349  | 1.920040  |
| H | 2.040118  | 2.694737  | 3.816873  |
| H | 2.965282  | 4.132413  | 4.290375  |
| H | 1.282822  | 4.295971  | 3.753130  |

Vibrational frequencies

|            |          |          |
|------------|----------|----------|
| -1126.7526 | 20.0534  | 27.1483  |
| 32.6887    | 39.4570  | 42.0369  |
| 47.9056    | 56.5116  | 68.0292  |
| 79.5193    | 82.8438  | 89.2215  |
| 92.4480    | 97.1480  | 110.7043 |
| 121.3390   | 125.5456 | 130.9882 |
| 135.3814   | 141.9212 | 145.5375 |
| 149.1469   | 160.8848 | 168.4284 |
| 171.6303   | 178.4551 | 190.9564 |



|           |           |           |
|-----------|-----------|-----------|
| 195.3062  | 203.5010  | 213.5354  |
| 219.8332  | 226.9597  | 236.1516  |
| 240.4934  | 253.4697  | 259.6266  |
| 285.3929  | 287.7365  | 289.7166  |
| 293.6394  | 304.5852  | 321.0177  |
| 330.5487  | 338.4778  | 343.2428  |
| 350.0923  | 368.7005  | 393.8252  |
| 401.5647  | 412.6181  | 417.5074  |
| 430.8553  | 439.3125  | 451.4868  |
| 468.8030  | 482.0781  | 491.8977  |
| 499.8764  | 505.0350  | 517.9938  |
| 527.0657  | 535.9680  | 560.2481  |
| 577.2171  | 582.6996  | 583.8597  |
| 586.7251  | 589.0166  | 597.3408  |
| 626.2021  | 627.9093  | 637.6606  |
| 646.8422  | 656.5432  | 673.0063  |
| 697.4457  | 703.7370  | 709.9061  |
| 723.0262  | 734.0905  | 746.5862  |
| 754.9449  | 755.1905  | 759.5518  |
| 779.2618  | 789.3552  | 793.0531  |
| 806.6543  | 812.4130  | 826.4150  |
| 845.2690  | 855.4354  | 860.2730  |
| 866.3332  | 877.6306  | 889.9771  |
| 890.2326  | 896.6060  | 902.4143  |
| 914.3668  | 921.2900  | 934.4612  |
| 941.3352  | 954.1316  | 956.7070  |
| 968.4623  | 979.0200  | 981.3165  |
| 986.4702  | 1000.8313 | 1017.1086 |
| 1021.3991 | 1022.1039 | 1027.3116 |
| 1039.3218 | 1042.2201 | 1043.1256 |
| 1046.6993 | 1049.2780 | 1052.0201 |
| 1057.8395 | 1062.3274 | 1064.4436 |
| 1066.7236 | 1068.4477 | 1076.8507 |
| 1082.1879 | 1105.7420 | 1118.1376 |
| 1121.3847 | 1138.7151 | 1153.7228 |
| 1170.0843 | 1176.8440 | 1180.0459 |
| 1184.9201 | 1187.5628 | 1193.4429 |
| 1208.8536 | 1210.9164 | 1213.4407 |
| 1217.4965 | 1223.7673 | 1237.3632 |
| 1255.1270 | 1256.6494 | 1265.5590 |
| 1277.5104 | 1285.5859 | 1290.2417 |
| 1304.5695 | 1308.3644 | 1319.6296 |
| 1321.5591 | 1334.0408 | 1341.3632 |
| 1344.3844 | 1347.3495 | 1360.6548 |

|           |           |           |
|-----------|-----------|-----------|
| 1367.2661 | 1374.5366 | 1380.0991 |
| 1385.1534 | 1387.6743 | 1391.7212 |
| 1411.3587 | 1419.3232 | 1419.9370 |
| 1420.2525 | 1429.3644 | 1445.6019 |
| 1450.3053 | 1458.5130 | 1465.8650 |
| 1472.5838 | 1473.6562 | 1488.2299 |
| 1488.3882 | 1488.8839 | 1491.9114 |
| 1493.9226 | 1494.3500 | 1498.2502 |
| 1502.7335 | 1506.9891 | 1517.7279 |
| 1519.1307 | 1528.8631 | 1531.3511 |
| 1537.6249 | 1539.3332 | 1543.7481 |
| 1553.0242 | 1589.6590 | 1670.0349 |
| 1672.7010 | 1682.8788 | 1685.9088 |
| 1694.4588 | 1695.6883 | 1706.7634 |
| 1731.1731 | 1738.6711 | 1879.5687 |
| 2395.7018 | 3062.0118 | 3072.7513 |
| 3077.5926 | 3079.0818 | 3079.8505 |
| 3087.7296 | 3092.6912 | 3102.9963 |
| 3115.6819 | 3136.5046 | 3139.2199 |
| 3143.0302 | 3145.3714 | 3150.8176 |
| 3151.6106 | 3157.1311 | 3159.3737 |
| 3164.4167 | 3164.5464 | 3167.1588 |
| 3170.1252 | 3171.8101 | 3193.0581 |
| 3194.7765 | 3198.4370 | 3199.9535 |
| 3206.6715 | 3212.3077 | 3212.4118 |
| 3218.6180 | 3226.8024 | 3230.9389 |
| 3239.3941 | 3245.6923 | 3255.4193 |

## TS6S

Zero-point correction= 0.843528

Thermal correction to Energy= 0.895166

Thermal correction to Enthalpy= 0.896111

Thermal correction to Gibbs Free Energy= 0.756266

Sum of electronic and zero-point Energies= -2407.652444

Sum of electronic and thermal Energies= -2407.600806

Sum of electronic and thermal Enthalpies= -2407.599861

Sum of electronic and thermal Free Energies= -2407.739706

Cartesian coordinates

|   |           |           |           |
|---|-----------|-----------|-----------|
| C | 0.619053  | -0.550155 | -1.142473 |
| C | 0.243965  | 0.753943  | -0.673655 |
| C | 0.895253  | 1.540895  | 0.468511  |
| O | 0.286358  | -0.986648 | -2.240640 |
| C | -0.140663 | 2.293882  | 1.326994  |
| C | 0.070030  | 2.516449  | 2.688617  |

|   |           |           |           |
|---|-----------|-----------|-----------|
| C | -1.268673 | 2.847610  | 0.714156  |
| C | -0.844933 | 3.259096  | 3.432039  |
| H | 0.947078  | 2.106192  | 3.181105  |
| C | -2.181429 | 3.589910  | 1.458422  |
| H | -1.436530 | 2.714481  | -0.350301 |
| C | -1.976308 | 3.792931  | 2.821570  |
| H | -0.669696 | 3.416827  | 4.491138  |
| H | -3.054282 | 4.008936  | 0.967893  |
| H | -2.690325 | 4.367682  | 3.401903  |
| C | 1.690570  | 0.670189  | 1.348828  |
| N | 2.341780  | 0.040842  | 2.067608  |
| H | 0.158681  | 1.391291  | -1.557839 |
| C | 1.131111  | -1.731751 | -0.277797 |
| C | 0.941101  | -3.778336 | 0.475067  |
| C | -1.215435 | -2.570021 | 0.159536  |
| H | -1.521070 | -2.055291 | -0.758365 |
| N | 2.215724  | -3.595999 | 0.295757  |
| N | 2.325649  | -2.315785 | -0.168500 |
| N | 0.243727  | -2.652983 | 0.140420  |
| C | 0.209464  | -5.035432 | 0.851824  |
| H | 0.683211  | -5.504051 | 1.715115  |
| H | 0.259239  | -5.728336 | 0.000530  |
| C | -1.817918 | -3.990381 | 0.210238  |
| O | -1.123945 | -4.741257 | 1.197403  |
| C | -3.031599 | -2.552882 | 1.661457  |
| C | -1.819676 | -1.918662 | 1.383226  |
| C | -1.367086 | -0.855027 | 2.147342  |
| C | -2.177681 | -0.386823 | 3.183544  |
| C | -3.412946 | -0.984979 | 3.435561  |
| C | -3.844323 | -2.080037 | 2.682472  |
| C | -3.232027 | -3.735959 | 0.740548  |
| H | -0.398973 | -0.401578 | 1.966734  |
| H | -4.035876 | -0.610234 | 4.241104  |
| H | -4.789904 | -2.564315 | 2.906325  |
| H | -3.900314 | -3.485369 | -0.091470 |
| H | -3.624995 | -4.622333 | 1.242875  |
| C | 3.650503  | -1.793366 | -0.416055 |
| C | 4.022859  | -1.441981 | -1.717529 |
| C | 4.550005  | -1.782721 | 0.664464  |
| C | 5.322482  | -0.961583 | -1.898821 |
| C | 5.829919  | -1.294664 | 0.418285  |
| C | 6.229797  | -0.863655 | -0.848866 |
| H | 5.629773  | -0.674713 | -2.901317 |
| H | 6.540718  | -1.267156 | 1.240486  |

|   |           |           |           |
|---|-----------|-----------|-----------|
| C | 4.227427  | -2.349089 | 2.023335  |
| H | 4.474809  | -3.414728 | 2.044480  |
| H | 3.177774  | -2.240053 | 2.287309  |
| H | 4.823574  | -1.842711 | 2.784693  |
| C | 7.607772  | -0.297721 | -1.064585 |
| H | 8.350820  | -0.826078 | -0.462762 |
| H | 7.635531  | 0.756784  | -0.768268 |
| H | 7.901431  | -0.356831 | -2.114459 |
| C | 3.131435  | -1.606423 | -2.918781 |
| H | 2.620512  | -0.668981 | -3.150584 |
| H | 2.371156  | -2.375146 | -2.771246 |
| H | 3.741448  | -1.884468 | -3.780466 |
| H | -1.780817 | -4.500413 | -0.759890 |
| H | -1.842875 | 0.450174  | 3.788088  |
| C | 4.432096  | 2.051643  | -0.376071 |
| C | 3.034953  | 1.983075  | -0.926040 |
| H | 4.663480  | 3.064868  | -0.036858 |
| H | 4.495512  | 1.386687  | 0.495932  |
| H | 5.142659  | 1.721223  | -1.132063 |
| C | 1.942062  | 2.616513  | -0.054306 |
| C | 1.185325  | 3.709181  | -0.795688 |
| H | 2.391576  | 3.072594  | 0.830652  |
| O | 1.072166  | 4.792277  | -0.032918 |
| O | 2.760773  | 1.444961  | -1.975454 |
| O | 0.702414  | 3.592253  | -1.897528 |
| C | 0.195288  | 5.828354  | -0.522662 |
| C | -0.052193 | 6.772895  | 0.630468  |
| H | 0.676387  | 6.317750  | -1.373815 |
| H | -0.727861 | 5.357021  | -0.872558 |
| H | -0.713983 | 7.580411  | 0.310245  |
| H | -0.525967 | 6.237152  | 1.457410  |
| H | 0.884781  | 7.209579  | 0.982753  |
| C | -2.648311 | 0.176651  | -2.240525 |
| C | -3.904826 | -0.013207 | -2.766106 |
| C | -5.032145 | -0.021688 | -1.903497 |
| C | -4.770557 | 0.188050  | -0.523554 |
| C | -3.476334 | 0.369044  | -0.093346 |
| H | -1.767879 | 0.177955  | -2.875872 |
| H | -4.007738 | -0.153036 | -3.833370 |
| H | -5.567079 | 0.212747  | 0.208022  |
| H | -3.260593 | 0.535091  | 0.957962  |
| C | -7.411931 | -0.201031 | -1.451093 |
| C | -6.506487 | -0.417982 | -3.793920 |
| H | -7.504010 | 0.769024  | -0.951317 |

|   |           |           |           |
|---|-----------|-----------|-----------|
| H | -8.325771 | -0.387120 | -2.011316 |
| H | -7.309865 | -0.980932 | -0.689460 |
| H | -6.185021 | 0.453515  | -4.373956 |
| H | -5.967670 | -1.299813 | -4.155556 |
| H | -7.569728 | -0.572091 | -3.965602 |
| N | -6.282627 | -0.215757 | -2.369441 |
| N | -2.419549 | 0.354446  | -0.925490 |
| H | -1.120312 | 0.523212  | -0.580227 |

Vibrational frequencies

|            |          |          |
|------------|----------|----------|
| -1340.0672 | 13.5142  | 14.5429  |
| 23.3212    | 31.6400  | 35.3582  |
| 43.1624    | 44.7422  | 50.3376  |
| 54.5551    | 57.2978  | 59.4580  |
| 68.0020    | 70.9245  | 75.9062  |
| 81.3233    | 83.2999  | 87.8788  |
| 91.4263    | 93.6377  | 97.6940  |
| 100.5145   | 106.2884 | 109.2254 |
| 112.6209   | 119.5813 | 121.4284 |
| 129.4208   | 136.3091 | 139.3352 |
| 145.1065   | 156.2545 | 163.4223 |
| 164.7780   | 176.4540 | 184.6110 |
| 190.3208   | 196.4501 | 208.2950 |
| 211.2005   | 212.5793 | 215.7602 |
| 224.9647   | 234.8981 | 239.5580 |
| 247.9849   | 256.8384 | 264.7088 |
| 270.2179   | 278.2172 | 288.4718 |
| 291.7004   | 292.5367 | 292.8448 |
| 319.3199   | 326.1290 | 340.1896 |
| 346.0528   | 359.6300 | 374.0144 |
| 377.6827   | 397.2380 | 410.2114 |
| 418.0993   | 421.6126 | 423.9322 |
| 428.6408   | 434.1415 | 453.9821 |
| 465.8879   | 483.6558 | 486.5403 |
| 493.6910   | 496.1264 | 502.5618 |
| 515.8978   | 520.1533 | 526.5655 |
| 545.1862   | 553.1657 | 558.1640 |
| 559.7987   | 564.4921 | 579.4185 |
| 582.4644   | 586.8400 | 604.5575 |
| 612.1895   | 627.1117 | 637.8594 |
| 650.4351   | 668.5667 | 670.7926 |
| 675.6284   | 704.8908 | 706.2757 |
| 721.5480   | 723.2247 | 742.9682 |
| 744.7627   | 748.4787 | 759.0361 |
| 762.8947   | 779.5077 | 781.1401 |

|           |           |           |
|-----------|-----------|-----------|
| 783.5013  | 793.4468  | 807.6994  |
| 822.7072  | 831.6709  | 840.5762  |
| 851.4879  | 854.5871  | 873.0446  |
| 873.8997  | 875.3076  | 879.7160  |
| 884.3442  | 897.8776  | 916.1130  |
| 917.9506  | 920.9315  | 935.9919  |
| 952.5650  | 954.4086  | 965.4243  |
| 968.5151  | 976.7474  | 979.9659  |
| 985.2468  | 991.7664  | 994.8232  |
| 1008.1081 | 1008.8530 | 1012.9592 |
| 1015.2319 | 1018.9855 | 1021.8905 |
| 1023.3733 | 1028.7531 | 1037.5918 |
| 1040.1165 | 1042.5211 | 1048.6344 |
| 1050.9878 | 1053.3935 | 1062.2582 |
| 1063.5119 | 1065.2643 | 1070.9555 |
| 1072.4136 | 1077.5271 | 1079.2669 |
| 1092.9466 | 1100.6601 | 1112.9623 |
| 1114.7212 | 1121.8046 | 1127.7136 |
| 1142.8143 | 1149.1807 | 1152.5453 |
| 1159.7271 | 1169.1467 | 1174.4708 |
| 1177.7140 | 1180.6253 | 1184.3200 |
| 1187.2941 | 1192.5876 | 1203.7407 |
| 1211.3419 | 1216.2144 | 1219.6334 |
| 1226.3114 | 1235.8216 | 1254.3498 |
| 1256.8808 | 1262.8544 | 1272.8831 |
| 1279.0837 | 1286.1449 | 1286.8233 |
| 1289.3004 | 1307.9747 | 1315.3064 |
| 1315.8701 | 1332.5255 | 1335.9059 |
| 1337.9544 | 1344.4862 | 1354.5308 |
| 1361.5517 | 1364.2292 | 1367.7108 |
| 1379.2350 | 1381.8317 | 1383.0422 |
| 1385.3794 | 1386.8234 | 1391.0306 |
| 1403.2896 | 1413.9872 | 1416.2528 |
| 1417.6081 | 1419.2803 | 1426.2031 |
| 1428.0833 | 1444.0682 | 1449.8911 |
| 1455.8020 | 1462.6698 | 1462.9347 |
| 1463.5416 | 1467.2740 | 1468.9118 |
| 1473.7790 | 1489.8938 | 1490.5624 |
| 1490.7642 | 1493.1401 | 1493.4447 |
| 1494.2203 | 1495.6337 | 1500.6181 |
| 1502.3787 | 1502.7377 | 1503.4431 |
| 1505.0264 | 1516.2301 | 1517.3005 |
| 1520.1403 | 1521.9652 | 1524.1737 |
| 1531.8039 | 1536.0058 | 1537.9851 |

|           |           |           |
|-----------|-----------|-----------|
| 1550.2769 | 1569.5786 | 1589.9381 |
| 1606.1151 | 1648.7239 | 1671.8020 |
| 1676.7411 | 1682.9118 | 1684.7065 |
| 1692.9135 | 1693.9982 | 1706.4383 |
| 1707.7527 | 1753.4844 | 1839.3512 |
| 1873.8728 | 2419.8200 | 3060.3603 |
| 3061.7574 | 3068.2176 | 3069.8675 |
| 3071.9344 | 3080.3275 | 3083.4700 |
| 3085.0725 | 3092.3571 | 3102.5054 |
| 3110.0657 | 3119.8195 | 3130.4923 |
| 3131.5376 | 3136.0544 | 3136.7890 |
| 3140.3189 | 3141.4947 | 3151.5897 |
| 3153.7499 | 3158.6319 | 3167.0494 |
| 3169.2306 | 3170.3151 | 3171.1711 |
| 3175.1581 | 3185.4685 | 3190.2896 |
| 3193.1005 | 3198.5837 | 3198.8854 |
| 3201.4487 | 3202.0675 | 3202.5089 |
| 3206.1494 | 3206.7207 | 3217.3484 |
| 3217.8786 | 3224.2572 | 3227.6507 |
| 3231.3194 | 3234.2420 | 3244.1582 |
| 3254.4537 | 3258.6423 | 3266.8654 |

### TS6'R

Zero-point correction= 0.969366

Thermal correction to Energy= 1.029502

Thermal correction to Enthalpy= 1.030447

Thermal correction to Gibbs Free Energy= 0.872964

Sum of electronic and zero-point Energies= -3107.745941

Sum of electronic and thermal Energies= -3107.685805

Sum of electronic and thermal Enthalpies= -3107.684861

Sum of electronic and thermal Free Energies= -3107.842344

Cartesian coordinates

|   |           |           |           |
|---|-----------|-----------|-----------|
| C | -0.777852 | -0.324272 | -0.804679 |
| C | 0.014577  | 0.107736  | 0.330900  |
| C | -0.006384 | -0.581238 | 1.717763  |
| O | -1.037072 | 0.403774  | -1.759237 |
| C | 1.232286  | -1.420432 | 2.084929  |
| C | 1.138264  | -2.445310 | 3.028148  |
| C | 2.492424  | -1.030989 | 1.631389  |
| C | 2.283132  | -3.097356 | 3.477380  |
| H | 0.168285  | -2.745534 | 3.417304  |
| C | 3.638482  | -1.681209 | 2.082128  |
| H | 2.590665  | -0.181208 | 0.965941  |
| C | 3.537464  | -2.722110 | 3.002046  |

|   |           |           |           |
|---|-----------|-----------|-----------|
| H | 2.190708  | -3.897742 | 4.204263  |
| H | 4.611649  | -1.358208 | 1.723300  |
| H | 4.430151  | -3.228804 | 3.354524  |
| C | -1.220177 | -1.416566 | 1.845824  |
| N | -2.193061 | -2.039471 | 1.920848  |
| H | -0.154646 | 1.185477  | 0.420427  |
| C | -1.347806 | -1.726468 | -0.965485 |
| C | -2.805439 | -3.299910 | -1.320502 |
| C | -3.665960 | -0.981872 | -1.753796 |
| H | -3.181026 | -0.397809 | -2.540446 |
| N | -1.682988 | -3.919588 | -1.095136 |
| N | -0.780556 | -2.926012 | -0.880677 |
| N | -2.638950 | -1.941891 | -1.282313 |
| C | -4.143645 | -3.898903 | -1.627142 |
| H | -4.362159 | -4.691925 | -0.910764 |
| H | -4.127900 | -4.325659 | -2.639437 |
| C | -4.867848 | -1.782889 | -2.324876 |
| O | -5.128489 | -2.905565 | -1.498399 |
| C | -5.667334 | 0.036440  | -1.005372 |
| C | -4.302396 | -0.066856 | -0.730247 |
| C | -3.716150 | 0.716867  | 0.256410  |
| C | -4.518104 | 1.599646  | 0.978483  |
| C | -5.886378 | 1.686054  | 0.720863  |
| C | -6.469684 | 0.904816  | -0.274559 |
| C | -6.053818 | -0.830713 | -2.178615 |
| H | -2.651970 | 0.673278  | 0.462699  |
| H | -6.498070 | 2.374452  | 1.294450  |
| H | -7.532394 | 0.979125  | -0.483495 |
| H | -6.169133 | -0.227192 | -3.084974 |
| H | -6.975788 | -1.396835 | -2.027979 |
| C | 0.616459  | -3.250068 | -0.754155 |
| C | 1.499715  | -2.747984 | -1.717994 |
| C | 1.002647  | -4.146570 | 0.252601  |
| C | 2.846198  | -3.089433 | -1.575347 |
| C | 2.357275  | -4.447333 | 0.341013  |
| C | 3.295773  | -3.908757 | -0.542482 |
| H | 3.556124  | -2.718192 | -2.310593 |
| H | 2.690607  | -5.121892 | 1.125557  |
| C | 0.017136  | -4.808298 | 1.178953  |
| H | -0.446636 | -5.665656 | 0.682899  |
| H | -0.788159 | -4.136173 | 1.483013  |
| H | 0.531616  | -5.162495 | 2.073988  |
| C | 4.757239  | -4.221565 | -0.374362 |
| H | 4.916140  | -5.293154 | -0.229717 |



|    |           |           |           |
|----|-----------|-----------|-----------|
| H  | 5.147896  | -3.711114 | 0.512880  |
| H  | 5.338549  | -3.896616 | -1.239167 |
| C  | 1.047965  | -1.955894 | -2.920772 |
| H  | 0.911290  | -0.892798 | -2.706561 |
| H  | 0.104725  | -2.340406 | -3.320724 |
| H  | 1.801770  | -2.034117 | -3.705983 |
| H  | -4.685724 | -2.110513 | -3.355860 |
| H  | -4.063728 | 2.237545  | 1.729053  |
| C  | -0.119120 | 0.486764  | 2.902130  |
| C  | -1.390562 | 1.339879  | 2.851666  |
| C  | 1.136448  | 1.344198  | 2.894039  |
| H  | -0.117320 | -0.092445 | 3.826730  |
| C  | -2.523445 | 0.928058  | 3.742813  |
| O  | -1.465591 | 2.303700  | 2.109135  |
| O  | 1.968420  | 0.989370  | 3.843676  |
| O  | 1.358344  | 2.222506  | 2.078158  |
| H  | -2.150187 | 0.646684  | 4.729849  |
| H  | -3.243829 | 1.740201  | 3.826466  |
| H  | -3.015494 | 0.047356  | 3.312735  |
| Li | 0.008540  | 3.549151  | 1.557907  |
| C  | 3.273000  | 1.624494  | 3.843493  |
| O  | -0.334564 | 3.701396  | -0.324930 |
| Cl | -0.053351 | 5.418959  | 2.744892  |
| C  | 4.093463  | 0.929823  | 4.903577  |
| H  | 3.699962  | 1.505021  | 2.843532  |
| H  | 3.132849  | 2.689647  | 4.040659  |
| C  | 0.235693  | 4.904113  | -0.891828 |
| C  | -1.718286 | 3.567245  | -0.729521 |
| H  | 4.178414  | -0.136235 | 4.677730  |
| H  | 5.094680  | 1.364589  | 4.930050  |
| H  | 3.636363  | 1.049832  | 5.887742  |
| C  | -0.952205 | 5.702163  | -1.408927 |
| H  | 0.798909  | 5.414085  | -0.106869 |
| H  | 0.916271  | 4.614048  | -1.702006 |
| C  | -1.907090 | 4.588429  | -1.843870 |
| H  | -1.874261 | 2.531701  | -1.043756 |
| H  | -2.355560 | 3.787881  | 0.134580  |
| H  | -0.675302 | 6.380907  | -2.217112 |
| H  | -1.393085 | 6.284215  | -0.593797 |
| H  | -2.944567 | 4.914129  | -1.932515 |
| H  | -1.588019 | 4.167268  | -2.802969 |
| C  | 3.329751  | 0.175242  | -1.472424 |
| C  | 4.138875  | 0.588570  | -2.503921 |
| C  | 3.734656  | 1.679013  | -3.319157 |

|   |          |           |           |
|---|----------|-----------|-----------|
| C | 2.492817 | 2.282998  | -2.989986 |
| C | 1.753539 | 1.794436  | -1.937036 |
| H | 3.623743 | -0.662131 | -0.847097 |
| H | 5.076391 | 0.074855  | -2.667801 |
| H | 2.104101 | 3.118875  | -3.556170 |
| H | 0.796464 | 2.232524  | -1.664701 |
| C | 4.051984 | 3.251641  | -5.144394 |
| C | 5.749177 | 1.452773  | -4.655930 |
| H | 3.931440 | 4.145146  | -4.523129 |
| H | 4.803148 | 3.460211  | -5.903376 |
| H | 3.101904 | 3.040965  | -5.646618 |
| H | 6.455632 | 1.535283  | -3.823290 |
| H | 5.591547 | 0.392985  | -4.880749 |
| H | 6.191617 | 1.925029  | -5.530206 |
| N | 4.489697 | 2.114269  | -4.347160 |
| N | 2.152070 | 0.754049  | -1.181245 |
| H | 1.200279 | 0.280419  | -0.321851 |

Vibrational frequencies

|            |          |          |
|------------|----------|----------|
| -1340.5457 | 8.8071   | 21.4219  |
| 27.2814    | 34.0029  | 38.2035  |
| 40.2979    | 42.6520  | 44.0530  |
| 48.3996    | 48.7651  | 53.9094  |
| 58.9497    | 62.2552  | 67.5542  |
| 70.1803    | 71.7558  | 77.5718  |
| 80.0680    | 82.9980  | 89.4752  |
| 91.3358    | 95.5182  | 97.5119  |
| 100.7361   | 103.3504 | 109.1570 |
| 112.8742   | 117.1090 | 119.4219 |
| 125.5340   | 129.5492 | 133.2635 |
| 136.0136   | 138.1455 | 146.8724 |
| 148.2351   | 153.3992 | 154.9650 |
| 160.4979   | 165.7138 | 175.7825 |
| 184.7526   | 187.4858 | 194.2606 |
| 199.2159   | 208.2576 | 208.8348 |
| 213.6122   | 220.4429 | 227.5003 |
| 232.7561   | 237.6042 | 243.9437 |
| 245.7261   | 257.3920 | 274.0964 |
| 276.7311   | 279.3411 | 286.2457 |
| 289.6929   | 290.2886 | 292.9089 |
| 298.2138   | 302.3499 | 312.1942 |
| 321.7733   | 327.0338 | 340.9941 |
| 354.0002   | 367.5811 | 370.4424 |
| 380.6646   | 389.4965 | 405.1753 |
| 420.1709   | 427.5339 | 436.0932 |

|           |           |           |
|-----------|-----------|-----------|
| 439.4611  | 443.4036  | 447.7941  |
| 460.9005  | 482.4556  | 486.1343  |
| 492.4481  | 494.3908  | 500.0814  |
| 506.4341  | 519.1584  | 522.7423  |
| 527.4570  | 533.7477  | 551.9321  |
| 555.6476  | 562.1186  | 565.7656  |
| 574.4607  | 577.7118  | 584.3117  |
| 586.0712  | 588.9094  | 609.7083  |
| 627.1996  | 629.0529  | 637.1217  |
| 654.6187  | 665.7144  | 669.3781  |
| 674.0173  | 686.2580  | 690.2735  |
| 703.5869  | 722.8079  | 731.5458  |
| 743.2590  | 744.6147  | 751.8635  |
| 760.6086  | 764.8452  | 776.9402  |
| 785.6590  | 788.5849  | 799.4971  |
| 805.3338  | 816.5279  | 836.6229  |
| 839.5983  | 845.8813  | 846.8904  |
| 862.2133  | 864.7065  | 876.4673  |
| 881.2954  | 889.5003  | 891.8468  |
| 896.8802  | 898.5469  | 909.8376  |
| 920.3881  | 924.7661  | 930.8996  |
| 935.4939  | 937.1243  | 950.9755  |
| 960.0423  | 963.5047  | 965.6392  |
| 974.7096  | 982.0673  | 983.9232  |
| 987.5509  | 988.7218  | 992.0937  |
| 1003.3250 | 1008.5309 | 1017.1267 |
| 1023.4658 | 1026.0163 | 1028.1859 |
| 1031.9089 | 1034.0466 | 1037.2530 |
| 1038.8865 | 1040.8690 | 1042.3832 |
| 1048.3316 | 1055.1251 | 1057.9333 |
| 1062.0505 | 1062.8999 | 1064.2094 |
| 1068.0304 | 1069.7665 | 1073.5102 |
| 1075.7058 | 1085.0072 | 1094.4697 |
| 1099.3370 | 1108.7984 | 1109.7694 |
| 1121.9533 | 1122.2485 | 1138.3889 |
| 1141.3317 | 1148.3622 | 1150.8845 |
| 1152.8861 | 1168.3786 | 1173.9151 |
| 1180.6587 | 1182.2987 | 1185.2575 |
| 1186.4046 | 1195.5106 | 1204.0172 |
| 1206.6025 | 1211.4577 | 1211.8244 |
| 1215.6819 | 1218.1064 | 1219.7735 |
| 1228.9048 | 1236.1975 | 1252.2533 |
| 1259.5459 | 1269.3710 | 1279.8020 |
| 1282.4807 | 1284.0146 | 1287.8837 |

|           |           |           |
|-----------|-----------|-----------|
| 1290.5897 | 1294.1705 | 1302.1116 |
| 1311.2621 | 1312.4380 | 1325.3638 |
| 1326.4216 | 1336.3692 | 1342.6784 |
| 1344.5687 | 1349.2196 | 1353.8381 |
| 1356.9767 | 1357.6102 | 1366.7689 |
| 1368.3051 | 1370.3409 | 1377.6643 |
| 1378.5243 | 1386.9003 | 1389.7091 |
| 1390.1954 | 1393.2641 | 1394.6600 |
| 1406.0145 | 1412.1464 | 1420.2162 |
| 1423.3906 | 1423.6921 | 1429.0030 |
| 1432.1744 | 1449.3379 | 1453.5554 |
| 1455.1435 | 1457.5420 | 1462.3633 |
| 1465.9963 | 1467.0637 | 1477.0042 |
| 1486.0489 | 1489.0840 | 1490.6218 |
| 1491.5822 | 1491.9407 | 1493.0830 |
| 1494.4180 | 1495.5343 | 1499.1724 |
| 1501.7439 | 1502.1897 | 1503.3957 |
| 1505.0276 | 1505.4753 | 1507.7482 |
| 1518.0002 | 1519.7514 | 1521.2908 |
| 1521.8218 | 1525.5665 | 1527.2003 |
| 1532.7445 | 1534.6444 | 1537.6705 |
| 1539.6836 | 1548.6131 | 1593.4314 |
| 1601.1982 | 1610.8404 | 1664.2140 |
| 1670.2899 | 1681.1264 | 1681.4923 |
| 1684.9337 | 1694.0792 | 1695.1899 |
| 1703.8735 | 1710.5194 | 1752.3303 |
| 1793.8610 | 1840.7123 | 2402.8304 |
| 3059.0000 | 3065.0102 | 3066.4595 |
| 3068.9371 | 3072.3709 | 3072.4684 |
| 3081.2053 | 3081.5885 | 3087.1750 |
| 3087.4262 | 3089.8992 | 3090.1930 |
| 3097.9702 | 3103.6228 | 3108.1364 |
| 3127.2758 | 3128.2832 | 3129.7572 |
| 3137.9057 | 3141.9194 | 3149.4505 |
| 3151.1623 | 3155.4029 | 3156.8973 |
| 3157.1487 | 3157.1845 | 3157.9416 |
| 3161.7590 | 3162.6032 | 3167.3806 |
| 3169.6428 | 3173.1447 | 3176.5613 |
| 3177.1307 | 3177.5786 | 3182.7306 |
| 3194.6527 | 3196.9855 | 3199.4804 |
| 3205.8693 | 3206.2467 | 3206.2675 |
| 3208.7907 | 3208.9003 | 3218.4793 |
| 3221.6418 | 3226.8733 | 3230.7213 |
| 3231.5279 | 3231.7865 | 3241.5634 |

3252.6335

3253.2939

3264.5182

**TS6'S**

Zero-point correction= 0.969230

Thermal correction to Energy= 1.029346

Thermal correction to Enthalpy= 1.030290

Thermal correction to Gibbs Free Energy= 0.871662

Sum of electronic and zero-point Energies= -3107.740433

Sum of electronic and thermal Energies= -3107.680317

Sum of electronic and thermal Enthalpies= -3107.679373

Sum of electronic and thermal Free Energies= -3107.838001

## Cartesian coordinates

|   |           |           |           |
|---|-----------|-----------|-----------|
| C | 0.515289  | -0.506630 | -0.821073 |
| C | 0.231347  | 0.413258  | 0.252730  |
| C | 0.878722  | 0.445677  | 1.640612  |
| O | 0.207253  | -0.281164 | -1.985548 |
| C | -0.143400 | 0.774488  | 2.746911  |
| C | -0.004317 | 0.255451  | 4.034459  |
| C | -1.180247 | 1.674192  | 2.481672  |
| C | -0.905172 | 0.608806  | 5.036843  |
| H | 0.802852  | -0.433741 | 4.263491  |
| C | -2.079610 | 2.024543  | 3.484168  |
| H | -1.293992 | 2.111734  | 1.493483  |
| C | -1.949124 | 1.488112  | 4.763599  |
| H | -0.788547 | 0.189964  | 6.030697  |
| H | -2.883175 | 2.719326  | 3.261449  |
| H | -2.653822 | 1.758172  | 5.542854  |
| C | 1.525805  | -0.837138 | 1.961951  |
| N | 2.063758  | -1.818238 | 2.250977  |
| H | 0.200870  | 1.411535  | -0.192806 |
| C | 0.872022  | -2.008710 | -0.683476 |
| C | 0.469192  | -4.120680 | -1.087955 |
| C | -1.559773 | -2.714734 | -0.741659 |
| H | -1.777524 | -1.777538 | -1.267824 |
| N | 1.762710  | -4.000827 | -1.142063 |
| N | 2.005718  | -2.682210 | -0.884031 |
| N | -0.112612 | -2.918202 | -0.802322 |
| C | -0.383501 | -5.314902 | -1.409732 |
| H | 0.006884  | -6.202379 | -0.910350 |
| H | -0.350118 | -5.475293 | -2.496248 |
| C | -2.283057 | -3.898248 | -1.421907 |
| O | -1.702102 | -5.110015 | -0.960354 |
| C | -3.432787 | -3.295683 | 0.568690  |
| C | -2.161639 | -2.725511 | 0.645094  |

|   |           |           |           |
|---|-----------|-----------|-----------|
| C | -1.655145 | -2.242189 | 1.840682  |
| C | -2.466336 | -2.290149 | 2.976477  |
| C | -3.756819 | -2.815234 | 2.896431  |
| C | -4.245784 | -3.331756 | 1.693631  |
| C | -3.693146 | -3.813829 | -0.828154 |
| H | -0.646828 | -1.852069 | 1.909575  |
| H | -4.379370 | -2.842711 | 3.784603  |
| H | -5.237808 | -3.770671 | 1.645129  |
| H | -4.297564 | -3.105092 | -1.406826 |
| H | -4.185366 | -4.788262 | -0.852192 |
| C | 3.384029  | -2.248548 | -0.826046 |
| C | 3.860837  | -1.320095 | -1.759343 |
| C | 4.221087  | -2.900329 | 0.096978  |
| C | 5.212783  | -0.975482 | -1.680344 |
| C | 5.557748  | -2.512379 | 0.124461  |
| C | 6.069911  | -1.545516 | -0.744234 |
| H | 5.601311  | -0.251663 | -2.392340 |
| H | 6.222800  | -2.994954 | 0.836345  |
| C | 3.766620  | -4.033797 | 0.980972  |
| H | 3.879597  | -4.983487 | 0.449906  |
| H | 2.726539  | -3.939043 | 1.286509  |
| H | 4.383590  | -4.067752 | 1.880774  |
| C | 7.510879  | -1.121603 | -0.655049 |
| H | 8.150866  | -1.956900 | -0.361960 |
| H | 7.629440  | -0.335310 | 0.099025  |
| H | 7.867194  | -0.723441 | -1.606955 |
| C | 3.025378  | -0.728172 | -2.862999 |
| H | 2.614673  | 0.241898  | -2.568407 |
| H | 2.191507  | -1.371275 | -3.147955 |
| H | 3.655095  | -0.569140 | -3.740322 |
| H | -2.246956 | -3.844801 | -2.516432 |
| H | -2.087793 | -1.910953 | 3.920297  |
| C | 4.458529  | 0.696621  | 1.274492  |
| C | 3.173241  | 1.249653  | 0.747749  |
| H | 4.766738  | 1.242498  | 2.169754  |
| H | 4.302364  | -0.351584 | 1.563045  |
| H | 5.222434  | 0.747554  | 0.500928  |
| C | 2.060909  | 1.514061  | 1.761751  |
| C | 1.491478  | 2.913001  | 1.604268  |
| H | 2.454191  | 1.426481  | 2.776344  |
| O | 1.283918  | 3.483021  | 2.769527  |
| O | 2.991762  | 1.468073  | -0.437641 |
| O | 1.223109  | 3.426440  | 0.533027  |
| C | 0.585431  | 4.753835  | 2.762905  |

|    |           |           |           |
|----|-----------|-----------|-----------|
| C  | 0.228687  | 5.058773  | 4.198237  |
| H  | 1.246448  | 5.502211  | 2.318854  |
| H  | -0.299587 | 4.649292  | 2.128552  |
| H  | -0.311618 | 6.005841  | 4.245458  |
| H  | -0.408420 | 4.267844  | 4.602441  |
| H  | 1.127892  | 5.139145  | 4.812240  |
| Li | 1.901065  | 2.902203  | -1.269674 |
| Cl | 3.091001  | 4.437967  | -2.341164 |
| O  | 0.144521  | 2.781983  | -2.061281 |
| C  | 0.199853  | 2.533995  | -3.484571 |
| C  | -0.635288 | 3.968194  | -1.792851 |
| C  | -0.337112 | 3.802470  | -4.132844 |
| H  | 1.236967  | 2.313740  | -3.750376 |
| H  | -0.420742 | 1.657193  | -3.703144 |
| C  | -1.359766 | 4.273729  | -3.096442 |
| H  | -1.300113 | 3.748681  | -0.951059 |
| H  | 0.048919  | 4.777071  | -1.512304 |
| H  | -0.767945 | 3.615928  | -5.118180 |
| H  | 0.468481  | 4.536396  | -4.225926 |
| H  | -1.616206 | 5.330241  | -3.187105 |
| H  | -2.281466 | 3.685111  | -3.168068 |
| C  | -2.566511 | 1.038218  | -1.372988 |
| C  | -3.780549 | 1.233569  | -1.991146 |
| C  | -4.973831 | 0.827544  | -1.337392 |
| C  | -4.818935 | 0.248755  | -0.049679 |
| C  | -3.560191 | 0.094528  | 0.484281  |
| H  | -1.634673 | 1.343367  | -1.844575 |
| H  | -3.800473 | 1.686434  | -2.973710 |
| H  | -5.671739 | -0.074260 | 0.532042  |
| H  | -3.428997 | -0.341250 | 1.470135  |
| C  | -7.382772 | 0.545278  | -1.203042 |
| C  | -6.299596 | 1.605148  | -3.218543 |
| H  | -7.507286 | 1.080800  | -0.255703 |
| H  | -8.252128 | 0.744003  | -1.825984 |
| H  | -7.344029 | -0.529322 | -0.996654 |
| H  | -5.890792 | 2.620978  | -3.212939 |
| H  | -5.773303 | 1.018712  | -3.979472 |
| H  | -7.350771 | 1.660093  | -3.494308 |
| N  | -6.186450 | 0.986755  | -1.905551 |
| N  | -2.439414 | 0.464626  | -0.160888 |
| H  | -1.124566 | 0.295092  | 0.238855  |

Vibrational frequencies

|            |         |         |
|------------|---------|---------|
| -1372.3208 | 3.8047  | 21.1381 |
| 25.5693    | 30.9676 | 33.7350 |

|          |          |          |
|----------|----------|----------|
| 37.9387  | 42.8438  | 43.6861  |
| 47.3362  | 52.8774  | 54.0509  |
| 57.7065  | 63.2203  | 65.7896  |
| 68.6967  | 74.9239  | 77.3204  |
| 80.2012  | 82.9372  | 86.0096  |
| 88.5387  | 90.6591  | 95.6659  |
| 98.7487  | 103.3119 | 106.4114 |
| 109.3452 | 113.2158 | 118.5133 |
| 123.3572 | 126.4465 | 129.5817 |
| 131.5748 | 135.6588 | 136.2473 |
| 141.6809 | 148.2091 | 158.3330 |
| 162.4147 | 166.3912 | 177.9024 |
| 182.8019 | 189.2018 | 199.4753 |
| 204.5960 | 212.6665 | 217.2268 |
| 222.2931 | 225.9109 | 229.9892 |
| 241.3515 | 248.0078 | 254.0612 |
| 261.6436 | 264.8807 | 271.9957 |
| 276.0776 | 277.6841 | 281.4257 |
| 289.0078 | 290.3743 | 296.0866 |
| 298.2342 | 298.9065 | 313.9867 |
| 321.3177 | 329.7269 | 344.6509 |
| 352.4513 | 364.4557 | 378.4788 |
| 384.7959 | 400.1624 | 409.8618 |
| 421.4663 | 423.5567 | 429.6955 |
| 433.8551 | 443.6258 | 457.7772 |
| 466.5679 | 486.2546 | 488.6091 |
| 494.2124 | 494.8650 | 501.4109 |
| 502.4447 | 517.8034 | 520.5995 |
| 527.8245 | 531.3017 | 553.4197 |
| 556.0483 | 560.7046 | 564.2970 |
| 579.0299 | 579.6634 | 581.2129 |
| 585.2046 | 588.5788 | 607.4919 |
| 613.5191 | 630.1327 | 638.7616 |
| 651.3091 | 670.2634 | 672.4712 |
| 681.3198 | 688.2745 | 705.3602 |
| 710.1267 | 723.0294 | 725.1529 |
| 744.4758 | 746.5372 | 751.1303 |
| 756.3858 | 769.3935 | 781.2714 |
| 783.4163 | 786.9443 | 793.3162 |
| 810.3967 | 814.3907 | 840.0537 |
| 844.6468 | 854.5340 | 858.1088 |
| 861.5949 | 873.9472 | 875.4799 |
| 879.0459 | 882.5465 | 891.0656 |
| 892.0172 | 900.7456 | 916.1625 |



|           |           |           |
|-----------|-----------|-----------|
| 921.9164  | 926.9485  | 928.2271  |
| 931.7893  | 951.1193  | 954.3988  |
| 954.9206  | 959.6710  | 969.6778  |
| 974.9229  | 980.1462  | 980.9961  |
| 982.6779  | 985.9906  | 990.8576  |
| 1006.1711 | 1013.2739 | 1015.1413 |
| 1016.6441 | 1019.6587 | 1024.6143 |
| 1027.5170 | 1030.0481 | 1031.7550 |
| 1036.6505 | 1041.6722 | 1046.7235 |
| 1049.6741 | 1050.9757 | 1056.3327 |
| 1057.5630 | 1059.4597 | 1065.7196 |
| 1068.1714 | 1069.0887 | 1069.9733 |
| 1076.4976 | 1077.1695 | 1093.1550 |
| 1097.4248 | 1111.1218 | 1114.5602 |
| 1114.7849 | 1125.4192 | 1128.3189 |
| 1138.8696 | 1145.1775 | 1150.7856 |
| 1159.1096 | 1173.7658 | 1174.1312 |
| 1176.5834 | 1178.7726 | 1181.5545 |
| 1184.6124 | 1187.3465 | 1206.3976 |
| 1207.9190 | 1208.0551 | 1211.3978 |
| 1213.1974 | 1218.4158 | 1224.4119 |
| 1227.2671 | 1234.2658 | 1252.8223 |
| 1256.1340 | 1262.4184 | 1272.6256 |
| 1274.5353 | 1283.4984 | 1285.6299 |
| 1288.0750 | 1292.4245 | 1297.8649 |
| 1306.5575 | 1308.9117 | 1317.1142 |
| 1324.4290 | 1330.6211 | 1336.6965 |
| 1339.7063 | 1341.5403 | 1355.9416 |
| 1358.7706 | 1361.8758 | 1364.4052 |
| 1371.4982 | 1375.1547 | 1378.4796 |
| 1380.4849 | 1385.0574 | 1387.4479 |
| 1388.4693 | 1390.0344 | 1403.7672 |
| 1407.6204 | 1419.1540 | 1421.2078 |
| 1423.6340 | 1425.7893 | 1431.5905 |
| 1437.4973 | 1446.9476 | 1453.1109 |
| 1455.0096 | 1461.9173 | 1463.0401 |
| 1465.5240 | 1467.4944 | 1474.0583 |
| 1484.0018 | 1487.2557 | 1489.5039 |
| 1491.7709 | 1492.2530 | 1492.9542 |
| 1494.3000 | 1497.6974 | 1499.7665 |
| 1500.2580 | 1501.7995 | 1502.4069 |
| 1503.1571 | 1503.3737 | 1508.4821 |
| 1516.1477 | 1516.4986 | 1519.6307 |
| 1519.9387 | 1522.3619 | 1523.9663 |

|           |           |           |
|-----------|-----------|-----------|
| 1530.5631 | 1532.8359 | 1535.6022 |
| 1539.0886 | 1553.0823 | 1571.9666 |
| 1588.0992 | 1607.3714 | 1641.1630 |
| 1670.0197 | 1676.4705 | 1682.1402 |
| 1682.6282 | 1690.1660 | 1695.8976 |
| 1701.1006 | 1703.9971 | 1761.4672 |
| 1795.4069 | 1841.6893 | 2417.4793 |
| 3054.4184 | 3060.7170 | 3063.5765 |
| 3065.8888 | 3072.0135 | 3078.2442 |
| 3078.4656 | 3078.8833 | 3083.1108 |
| 3085.4876 | 3085.7160 | 3087.6742 |
| 3103.8150 | 3104.5237 | 3107.3384 |
| 3109.6282 | 3120.8948 | 3121.9535 |
| 3134.2894 | 3142.2338 | 3142.8615 |
| 3148.8135 | 3150.1587 | 3152.6278 |
| 3153.6431 | 3154.9858 | 3159.4844 |
| 3162.4053 | 3163.6451 | 3170.3028 |
| 3172.1814 | 3173.5218 | 3175.6300 |
| 3178.4896 | 3180.3773 | 3194.1965 |
| 3198.8893 | 3203.4967 | 3204.6550 |
| 3207.0712 | 3209.4648 | 3211.2778 |
| 3216.5721 | 3217.8181 | 3220.6146 |
| 3231.5116 | 3232.2851 | 3235.6914 |
| 3241.8238 | 3244.1855 | 3247.5512 |
| 3249.8617 | 3261.2142 | 3270.9049 |

## M6R

Zero-point correction= 0.849576

Thermal correction to Energy= 0.901070

Thermal correction to Enthalpy= 0.902014

Thermal correction to Gibbs Free Energy= 0.763119

Sum of electronic and zero-point Energies= -2407.679343

Sum of electronic and thermal Energies= -2407.627850

Sum of electronic and thermal Enthalpies= -2407.626905

Sum of electronic and thermal Free Energies= -2407.765800

Cartesian coordinates

|   |           |           |           |
|---|-----------|-----------|-----------|
| C | 1.191767  | 0.707561  | -0.547438 |
| C | -0.077221 | -0.112855 | -0.630268 |
| C | 0.023165  | -1.669222 | -0.460616 |
| O | 1.585628  | 1.393085  | -1.459388 |
| C | -0.988467 | -2.230204 | 0.556149  |
| C | -0.705251 | -3.403091 | 1.258804  |
| C | -2.260312 | -1.660848 | 0.655847  |
| C | -1.674555 | -3.991595 | 2.066195  |

|   |           |           |           |
|---|-----------|-----------|-----------|
| H | 0.277060  | -3.863566 | 1.184317  |
| C | -3.234222 | -2.267133 | 1.446305  |
| H | -2.505340 | -0.754194 | 0.108087  |
| C | -2.945708 | -3.428441 | 2.158478  |
| H | -1.435002 | -4.895428 | 2.616648  |
| H | -4.223686 | -1.822494 | 1.509346  |
| H | -3.705841 | -3.892902 | 2.778709  |
| C | 1.388106  | -2.039899 | -0.040873 |
| N | 2.454778  | -2.310778 | 0.316037  |
| H | -0.490887 | 0.114897  | -1.613702 |
| C | 2.011220  | 0.799508  | 0.732907  |
| C | 3.652412  | 1.200936  | 2.104512  |
| C | 4.179440  | 1.781528  | -0.265521 |
| H | 3.568570  | 2.475948  | -0.844227 |
| N | 2.659713  | 0.815652  | 2.858493  |
| N | 1.646348  | 0.574136  | 1.995725  |
| N | 3.293268  | 1.224729  | 0.787222  |
| C | 5.003663  | 1.662803  | 2.559011  |
| H | 5.410789  | 0.951448  | 3.279614  |
| H | 4.891892  | 2.639634  | 3.050149  |
| C | 5.365117  | 2.521222  | 0.402798  |
| O | 5.878398  | 1.730972  | 1.464322  |
| C | 6.168230  | 1.234498  | -1.421668 |
| C | 4.875385  | 0.777531  | -1.157005 |
| C | 4.391501  | -0.393129 | -1.717156 |
| C | 5.234985  | -1.121089 | -2.556055 |
| C | 6.526151  | -0.671514 | -2.829294 |
| C | 7.002989  | 0.512689  | -2.263861 |
| C | 6.435125  | 2.528774  | -0.689725 |
| H | 3.388907  | -0.747872 | -1.516790 |
| H | 7.170185  | -1.252338 | -3.482535 |
| H | 8.011942  | 0.856423  | -2.471102 |
| H | 6.297133  | 3.393707  | -1.347426 |
| H | 7.430722  | 2.591728  | -0.245242 |
| C | 0.337017  | 0.307728  | 2.540672  |
| C | -0.643512 | 1.296810  | 2.385844  |
| C | 0.155122  | -0.851740 | 3.302086  |
| C | -1.886233 | 1.045603  | 2.962809  |
| C | -1.105938 | -1.040469 | 3.862558  |
| C | -2.135273 | -0.115022 | 3.696952  |
| H | -2.670713 | 1.788826  | 2.845135  |
| H | -1.288289 | -1.944442 | 4.439022  |
| C | 1.259373  | -1.844295 | 3.552667  |
| H | 1.840943  | -1.544971 | 4.432077  |

|   |           |           |           |
|---|-----------|-----------|-----------|
| H | 1.948911  | -1.922634 | 2.709260  |
| H | 0.830686  | -2.832497 | 3.742061  |
| C | -3.481939 | -0.355982 | 4.323768  |
| H | -3.478124 | -0.045629 | 5.373804  |
| H | -3.737768 | -1.417977 | 4.292244  |
| H | -4.265125 | 0.207687  | 3.812358  |
| C | -0.383432 | 2.592335  | 1.660571  |
| H | -0.402945 | 2.469110  | 0.572531  |
| H | 0.578711  | 3.027743  | 1.944386  |
| H | -1.167533 | 3.312311  | 1.901272  |
| H | 5.083689  | 3.515745  | 0.770035  |
| H | 4.876265  | -2.045235 | -2.999352 |
| C | -0.256334 | -2.409959 | -1.817397 |
| C | 0.661302  | -1.961518 | -2.956812 |
| C | -1.716928 | -2.218101 | -2.208566 |
| H | -0.090646 | -3.481289 | -1.653905 |
| C | 0.348087  | -2.492006 | -4.327921 |
| O | 1.591821  | -1.220972 | -2.732640 |
| O | -2.447863 | -3.286282 | -1.933948 |
| O | -2.141782 | -1.188100 | -2.684649 |
| H | -0.520254 | -1.950117 | -4.717796 |
| H | 1.200227  | -2.329043 | -4.986125 |
| H | 0.087876  | -3.553343 | -4.288995 |
| C | -3.876055 | -3.133728 | -2.093641 |
| C | -4.518807 | -4.367375 | -1.505920 |
| H | -4.178154 | -2.221006 | -1.568248 |
| H | -4.094776 | -3.007393 | -3.157217 |
| H | -4.258540 | -4.457972 | -0.447168 |
| H | -5.603715 | -4.295203 | -1.595490 |
| H | -4.185189 | -5.266416 | -2.029766 |
| C | -4.053973 | 1.457697  | 0.308891  |
| C | -5.151916 | 2.202595  | -0.080450 |
| C | -5.017693 | 3.124137  | -1.145025 |
| C | -3.737944 | 3.200386  | -1.742111 |
| C | -2.718725 | 2.397498  | -1.262312 |
| H | -4.156024 | 0.746612  | 1.130103  |
| H | -6.094554 | 2.065986  | 0.433409  |
| H | -3.537567 | 3.869970  | -2.568486 |
| H | -1.735503 | 2.458510  | -1.728475 |
| C | -5.872678 | 4.807160  | -2.680229 |
| C | -7.353934 | 3.768273  | -0.929295 |
| H | -5.578305 | 4.277766  | -3.593768 |
| H | -6.811091 | 5.324222  | -2.872340 |
| H | -5.107041 | 5.558068  | -2.453997 |

|   |           |          |           |
|---|-----------|----------|-----------|
| H | -7.761284 | 2.755022 | -1.033448 |
| H | -7.293966 | 4.007735 | 0.138468  |
| H | -8.047807 | 4.464567 | -1.395506 |
| N | -6.057144 | 3.888688 | -1.570801 |
| N | -2.838324 | 1.531221 | -0.248566 |
| H | -0.787568 | 0.286782 | 0.099730  |

Vibrational frequencies

|          |          |          |
|----------|----------|----------|
| 10.6723  | 16.4605  | 26.8748  |
| 32.7911  | 34.9105  | 43.6537  |
| 45.7487  | 49.6075  | 53.4738  |
| 57.3070  | 64.5791  | 71.5520  |
| 74.5410  | 77.7883  | 80.0845  |
| 86.2491  | 95.3655  | 95.9932  |
| 105.1366 | 112.0671 | 114.9290 |
| 116.7123 | 118.9506 | 122.1967 |
| 126.3781 | 130.6430 | 131.2128 |
| 137.8661 | 143.1024 | 152.6176 |
| 156.1693 | 164.2545 | 166.0035 |
| 167.4863 | 178.5175 | 186.6572 |
| 197.0082 | 200.6266 | 210.1042 |
| 220.6388 | 225.7214 | 233.0231 |
| 238.4015 | 251.0232 | 260.5568 |
| 264.1067 | 266.4846 | 274.4063 |
| 283.2528 | 285.8891 | 288.1254 |
| 289.9580 | 296.8447 | 304.7301 |
| 323.7418 | 338.4187 | 352.3871 |
| 363.9405 | 370.6937 | 380.7031 |
| 390.5606 | 396.4640 | 407.8842 |
| 417.9268 | 425.4072 | 427.2820 |
| 428.4153 | 430.8096 | 444.0627 |
| 472.0167 | 478.6934 | 486.5677 |
| 492.5438 | 501.4154 | 504.2180 |
| 518.3757 | 526.3130 | 536.9247 |
| 552.3595 | 556.6042 | 557.7399 |
| 568.6887 | 571.1278 | 583.2373 |
| 585.0520 | 590.2426 | 615.4882 |
| 628.2275 | 632.4134 | 647.9319 |
| 653.0061 | 670.1234 | 680.9727 |
| 694.9801 | 712.4928 | 720.5007 |
| 722.3804 | 732.0586 | 749.2045 |
| 754.3073 | 758.3052 | 768.1796 |
| 774.1908 | 779.3809 | 783.1587 |
| 793.4822 | 806.7764 | 814.2728 |
| 827.9701 | 838.1587 | 841.6157 |

|           |           |           |
|-----------|-----------|-----------|
| 847.7175  | 859.2106  | 868.6222  |
| 878.1647  | 883.2723  | 893.7590  |
| 894.7029  | 907.7965  | 914.1131  |
| 919.4909  | 932.9404  | 957.4360  |
| 959.4737  | 966.7974  | 977.6893  |
| 984.2423  | 986.1279  | 991.0135  |
| 994.3219  | 994.6527  | 1009.4720 |
| 1012.0479 | 1014.8130 | 1017.2305 |
| 1022.0330 | 1024.4548 | 1025.6314 |
| 1032.1813 | 1032.6539 | 1039.4616 |
| 1045.6533 | 1051.7544 | 1053.6434 |
| 1054.5378 | 1063.0125 | 1065.3666 |
| 1066.1235 | 1068.2386 | 1076.8889 |
| 1079.6555 | 1081.4384 | 1093.0427 |
| 1100.1598 | 1113.6230 | 1113.9032 |
| 1118.0055 | 1138.8781 | 1144.6161 |
| 1148.4276 | 1151.6215 | 1153.1365 |
| 1161.3607 | 1174.3147 | 1177.8379 |
| 1183.4848 | 1186.4178 | 1187.5346 |
| 1192.1012 | 1204.9742 | 1211.4441 |
| 1212.2872 | 1222.4306 | 1226.8475 |
| 1239.6147 | 1243.1036 | 1248.5917 |
| 1255.4910 | 1262.4875 | 1268.5641 |
| 1286.2723 | 1288.2587 | 1289.1819 |
| 1306.0719 | 1311.3893 | 1311.8895 |
| 1313.1750 | 1332.7179 | 1335.9306 |
| 1338.2965 | 1348.2081 | 1351.3590 |
| 1357.5255 | 1359.5176 | 1366.4100 |
| 1377.2657 | 1380.6996 | 1381.1563 |
| 1384.8837 | 1392.2504 | 1400.4256 |
| 1409.5550 | 1410.6712 | 1415.6929 |
| 1418.9546 | 1424.3106 | 1430.9278 |
| 1435.5228 | 1450.5766 | 1452.4033 |
| 1454.2599 | 1463.2669 | 1469.0864 |
| 1471.0962 | 1473.0159 | 1477.8986 |
| 1488.8361 | 1491.2866 | 1492.6802 |
| 1493.0946 | 1493.8073 | 1494.8737 |
| 1495.0294 | 1495.6267 | 1501.2424 |
| 1502.6860 | 1504.4483 | 1506.4852 |
| 1510.5536 | 1517.2689 | 1519.5211 |
| 1521.8677 | 1524.8632 | 1527.6363 |
| 1532.7686 | 1535.1858 | 1540.5800 |
| 1555.0020 | 1576.0173 | 1590.8608 |
| 1627.1392 | 1662.2810 | 1675.0879 |

|           |           |           |
|-----------|-----------|-----------|
| 1684.5025 | 1684.8851 | 1690.5989 |
| 1693.6458 | 1694.7101 | 1707.5914 |
| 1842.2815 | 1854.7650 | 1872.0286 |
| 2408.1059 | 3045.8069 | 3054.0347 |
| 3066.0598 | 3070.5959 | 3072.4010 |
| 3075.7810 | 3076.2547 | 3078.0519 |
| 3086.3628 | 3095.5436 | 3097.8819 |
| 3106.9524 | 3107.1608 | 3111.9114 |
| 3127.6315 | 3141.2222 | 3144.5738 |
| 3146.5421 | 3148.8337 | 3153.9802 |
| 3154.0878 | 3155.4365 | 3159.9189 |
| 3164.9529 | 3166.8384 | 3170.5024 |
| 3171.9462 | 3173.5586 | 3173.7846 |
| 3179.5747 | 3182.3951 | 3183.9294 |
| 3195.4503 | 3197.5392 | 3198.0719 |
| 3199.6842 | 3206.0232 | 3206.4960 |
| 3210.7918 | 3213.5080 | 3213.8987 |
| 3217.1625 | 3228.7065 | 3232.3042 |
| 3250.8116 | 3252.6846 | 3271.2335 |

M6R<sup>b</sup>

Zero-point correction= 0.835267

Thermal correction to Energy= 0.886669

Thermal correction to Enthalpy= 0.887614

Thermal correction to Gibbs Free Energy= 0.748656

Sum of electronic and zero-point Energies= -2407.197481

Sum of electronic and thermal Energies= -2407.146079

Sum of electronic and thermal Enthalpies= -2407.145135

Sum of electronic and thermal Free Energies= -2407.284092

Cartesian coordinates

|   |           |          |           |
|---|-----------|----------|-----------|
| C | -2.308898 | 0.404358 | 1.483032  |
| C | -0.984408 | 0.453047 | 1.811100  |
| C | 0.280624  | 0.391698 | 0.963655  |
| O | -3.319226 | 0.379221 | 2.267676  |
| C | 0.800144  | 1.772502 | 0.473335  |
| C | 1.729785  | 1.847390 | -0.567460 |
| C | 0.439999  | 2.945210 | 1.134227  |
| C | 2.316863  | 3.061339 | -0.916559 |
| H | 1.992879  | 0.948566 | -1.120139 |
| C | 1.037772  | 4.156741 | 0.799646  |
| H | -0.294133 | 2.891802 | 1.930782  |
| C | 1.985483  | 4.220443 | -0.218878 |
| H | 3.035710  | 3.097570 | -1.730093 |
| H | 0.754346  | 5.057808 | 1.336611  |

|   |           |           |           |
|---|-----------|-----------|-----------|
| H | 2.451300  | 5.167343  | -0.476773 |
| C | 0.024706  | -0.397944 | -0.268634 |
| N | -0.196560 | -0.916809 | -1.281531 |
| C | -2.793972 | 0.360962  | 0.038700  |
| C | -4.036342 | -0.219926 | -1.670220 |
| C | -4.265559 | -1.692621 | 0.334219  |
| H | -4.517295 | -1.255693 | 1.306018  |
| N | -3.514841 | 0.919625  | -2.011271 |
| N | -2.750845 | 1.276644  | -0.933653 |
| N | -3.633881 | -0.596023 | -0.419961 |
| C | -5.038365 | -1.030419 | -2.435090 |
| H | -4.682887 | -1.203020 | -3.452295 |
| H | -5.983152 | -0.470306 | -2.481984 |
| C | -5.519907 | -2.176420 | -0.433131 |
| O | -5.214306 | -2.281302 | -1.819102 |
| C | -4.319718 | -4.062280 | 0.367594  |
| C | -3.466265 | -2.964162 | 0.496630  |
| C | -2.122669 | -3.121383 | 0.793969  |
| C | -1.627480 | -4.418129 | 0.943784  |
| C | -2.470723 | -5.520874 | 0.811510  |
| C | -3.827643 | -5.351034 | 0.526411  |
| C | -5.729541 | -3.605013 | 0.071302  |
| H | -1.449123 | -2.279176 | 0.907940  |
| H | -2.069961 | -6.523139 | 0.929626  |
| H | -4.483456 | -6.210712 | 0.422505  |
| H | -6.342553 | -3.597420 | 0.979201  |
| H | -6.244252 | -4.203925 | -0.683767 |
| C | -2.226190 | 2.619959  | -0.914847 |
| C | -2.805950 | 3.538022  | -0.032587 |
| C | -1.283023 | 2.985648  | -1.882457 |
| C | -2.334393 | 4.851143  | -0.078717 |
| C | -0.866857 | 4.312853  | -1.895827 |
| C | -1.363275 | 5.252657  | -0.991885 |
| H | -2.758575 | 5.580391  | 0.606956  |
| H | -0.119790 | 4.617183  | -2.625189 |
| C | -0.767880 | 2.018022  | -2.912529 |
| H | -1.485134 | 1.921345  | -3.734092 |
| H | -0.610202 | 1.023658  | -2.493022 |
| H | 0.178757  | 2.380088  | -3.319288 |
| C | -0.832888 | 6.660799  | -1.000432 |
| H | -0.801456 | 7.066804  | -2.015098 |
| H | 0.191406  | 6.675518  | -0.611188 |
| H | -1.441147 | 7.322042  | -0.379926 |
| C | -3.944988 | 3.170822  | 0.882153  |



|   |           |           |           |
|---|-----------|-----------|-----------|
| H | -3.645280 | 2.502115  | 1.693431  |
| H | -4.732998 | 2.652894  | 0.323384  |
| H | -4.377467 | 4.076364  | 1.311233  |
| H | -6.383375 | -1.514709 | -0.287533 |
| H | -0.572367 | -4.538743 | 1.163963  |
| C | 1.432322  | -0.286580 | 1.749905  |
| C | 1.461526  | -1.706320 | 1.886160  |
| C | 2.141732  | 0.562413  | 2.693840  |
| H | 2.956466  | -0.558324 | 0.628686  |
| C | 2.437219  | -2.392322 | 2.842311  |
| O | 0.732000  | -2.460197 | 1.208890  |
| O | 3.439213  | 0.160845  | 2.876570  |
| O | 1.721366  | 1.554439  | 3.265038  |
| H | 2.461470  | -1.925988 | 3.829233  |
| H | 2.119217  | -3.431833 | 2.927672  |
| H | 3.457075  | -2.360319 | 2.447420  |
| C | 4.146564  | 0.795281  | 3.945840  |
| C | 5.436736  | 0.029252  | 4.148548  |
| H | 4.331434  | 1.842588  | 3.686148  |
| H | 3.523796  | 0.784967  | 4.845489  |
| H | 6.040354  | 0.036971  | 3.237172  |
| H | 6.020751  | 0.482630  | 4.952822  |
| H | 5.225992  | -1.009740 | 4.414152  |
| C | 4.860712  | -0.326719 | -0.220248 |
| C | 5.735457  | -0.740015 | -1.188207 |
| C | 5.360281  | -1.785129 | -2.082240 |
| C | 4.066330  | -2.353899 | -1.904875 |
| C | 3.245926  | -1.887388 | -0.913802 |
| H | 5.089518  | 0.463753  | 0.484636  |
| H | 6.700174  | -0.257892 | -1.255376 |
| H | 3.709028  | -3.154068 | -2.536776 |
| H | 2.251077  | -2.279437 | -0.722436 |
| C | 5.766943  | -3.274578 | -3.955011 |
| C | 7.511105  | -1.618060 | -3.195405 |
| H | 4.864116  | -2.985411 | -4.501230 |
| H | 6.560759  | -3.456781 | -4.675634 |
| H | 5.571242  | -4.203581 | -3.410604 |
| H | 7.437416  | -0.550161 | -3.423678 |
| H | 8.102239  | -1.747742 | -2.283623 |
| H | 8.029616  | -2.111613 | -4.014030 |
| N | 6.188266  | -2.213609 | -3.047229 |
| N | 3.646341  | -0.893244 | -0.094237 |
| H | -0.791057 | 0.501106  | 2.878320  |

Vibrational frequencies

|          |          |           |
|----------|----------|-----------|
| 12.7710  | 16.9355  | 27.8571   |
| 29.6011  | 37.2978  | 43.6118   |
| 47.5879  | 48.5082  | 51.0256   |
| 58.6394  | 59.3943  | 64.0584   |
| 69.9720  | 73.3994  | 77.7769   |
| 84.8163  | 87.7873  | 94.1761   |
| 95.1895  | 97.3015  | 97.9001   |
| 108.6676 | 115.1325 | 121.2405  |
| 131.0389 | 134.9160 | 135.3008  |
| 136.1670 | 146.5238 | 155.2877  |
| 164.7766 | 170.0444 | 176.4901  |
| 184.8224 | 192.8611 | 196.9654  |
| 201.9142 | 205.0834 | 211.0225  |
| 211.9491 | 225.6796 | 229.8448  |
| 238.1139 | 253.2776 | 259.4085  |
| 261.1745 | 268.1926 | 276.9126  |
| 281.4476 | 288.4224 | 294.5940  |
| 296.4164 | 312.7812 | 319.0129  |
| 330.0867 | 342.2364 | 344.5632  |
| 357.6575 | 370.3768 | 394.0052  |
| 399.5542 | 402.5760 | 403.8019  |
| 412.2837 | 432.5188 | 433.0774  |
| 441.7261 | 442.8402 | 458.9759  |
| 480.7843 | 485.1095 | 492.0605  |
| 495.6082 | 502.5377 | 516.1222  |
| 526.0799 | 530.1853 | 531.3473  |
| 548.5855 | 551.8645 | 559.3280  |
| 573.5526 | 584.9400 | 586.6426  |
| 594.8888 | 598.2863 | 607.0859  |
| 626.3906 | 635.0744 | 642.1842  |
| 649.8430 | 658.2601 | 666.4748  |
| 679.2591 | 703.5397 | 721.3355  |
| 728.0431 | 734.8024 | 745.8289  |
| 754.6593 | 758.7271 | 770.1063  |
| 774.1184 | 776.1531 | 783.0073  |
| 794.6321 | 801.7938 | 804.6898  |
| 813.3500 | 817.0118 | 839.1250  |
| 843.8581 | 846.0201 | 864.3348  |
| 871.0158 | 876.5733 | 877.0609  |
| 884.6372 | 906.7039 | 908.9959  |
| 911.1358 | 926.6248 | 945.5395  |
| 957.1011 | 968.7990 | 977.5624  |
| 978.7238 | 981.6876 | 985.9399  |
| 993.1924 | 997.1615 | 1001.4030 |

|           |           |           |
|-----------|-----------|-----------|
| 1007.0473 | 1013.3257 | 1016.8796 |
| 1018.6654 | 1019.3768 | 1037.6388 |
| 1039.3626 | 1039.9389 | 1040.9381 |
| 1048.8795 | 1052.8487 | 1058.6727 |
| 1062.3245 | 1064.8481 | 1067.2402 |
| 1070.7287 | 1072.8199 | 1075.6637 |
| 1079.6557 | 1083.6835 | 1091.8641 |
| 1095.2901 | 1106.4858 | 1112.1375 |
| 1117.4586 | 1128.9632 | 1138.2975 |
| 1143.5931 | 1148.1783 | 1151.5351 |
| 1159.8446 | 1166.2122 | 1167.8416 |
| 1175.3231 | 1180.7372 | 1191.5140 |
| 1191.8759 | 1197.3723 | 1202.9746 |
| 1206.2343 | 1212.8569 | 1214.3625 |
| 1234.5262 | 1239.7413 | 1253.2818 |
| 1261.7163 | 1279.7203 | 1281.2361 |
| 1285.7709 | 1289.5154 | 1302.8363 |
| 1304.6835 | 1308.9544 | 1319.0797 |
| 1330.6369 | 1337.2224 | 1337.8934 |
| 1343.4734 | 1343.9501 | 1359.2759 |
| 1361.2707 | 1369.8392 | 1377.0578 |
| 1377.9869 | 1380.0183 | 1380.1958 |
| 1385.6775 | 1404.3042 | 1406.0876 |
| 1417.2344 | 1420.9426 | 1427.7568 |
| 1435.7409 | 1439.7700 | 1448.0757 |
| 1454.0756 | 1454.9830 | 1466.1126 |
| 1466.8236 | 1471.7798 | 1474.6142 |
| 1480.8377 | 1489.0438 | 1491.3499 |
| 1492.7163 | 1494.4326 | 1495.9957 |
| 1496.1818 | 1498.3423 | 1498.3703 |
| 1502.4715 | 1503.8436 | 1504.5025 |
| 1505.2196 | 1509.3756 | 1513.5745 |
| 1513.7863 | 1524.0834 | 1533.4796 |
| 1535.6219 | 1535.8558 | 1537.7958 |
| 1543.3624 | 1567.2553 | 1590.1423 |
| 1616.7108 | 1651.5088 | 1660.2972 |
| 1673.6323 | 1680.3110 | 1684.0389 |
| 1687.2842 | 1691.4941 | 1697.5902 |
| 1708.1028 | 1709.4347 | 1727.2984 |
| 1783.5664 | 2383.0358 | 2833.3460 |
| 3058.2795 | 3062.4356 | 3065.2888 |
| 3065.5958 | 3071.0201 | 3071.3160 |
| 3079.3249 | 3079.4759 | 3086.1546 |
| 3089.6001 | 3094.9932 | 3130.6973 |

|           |           |           |
|-----------|-----------|-----------|
| 3131.1271 | 3132.4253 | 3134.2353 |
| 3136.5482 | 3137.6762 | 3146.0105 |
| 3149.4778 | 3155.7637 | 3163.8982 |
| 3164.2466 | 3167.6983 | 3168.1577 |
| 3170.2782 | 3178.9116 | 3185.7598 |
| 3187.0212 | 3196.4815 | 3197.1018 |
| 3198.8433 | 3203.6165 | 3207.4312 |
| 3207.4970 | 3210.4797 | 3214.2965 |
| 3216.7595 | 3219.4176 | 3231.1525 |
| 3231.5706 | 3245.1252 | 3246.1354 |
| 3257.3320 | 3272.2748 | 3275.5743 |

### M6S

Zero-point correction= 0.848360

Thermal correction to Energy= 0.900434

Thermal correction to Enthalpy= 0.901379

Thermal correction to Gibbs Free Energy= 0.759698

Sum of electronic and zero-point Energies= -2407.669830

Sum of electronic and thermal Energies= -2407.617756

Sum of electronic and thermal Enthalpies= -2407.616812

Sum of electronic and thermal Free Energies= -2407.758492

Cartesian coordinates

|   |           |           |           |
|---|-----------|-----------|-----------|
| C | 0.920835  | -0.524334 | -1.176456 |
| C | 0.361872  | 0.772972  | -0.666044 |
| C | 1.145058  | 1.668725  | 0.326054  |
| O | 0.889588  | -0.826908 | -2.341131 |
| C | 0.167474  | 2.477391  | 1.202064  |
| C | 0.569254  | 2.944532  | 2.454386  |
| C | -1.098273 | 2.817236  | 0.715564  |
| C | -0.287467 | 3.731036  | 3.220141  |
| H | 1.550143  | 2.689260  | 2.845431  |
| C | -1.950703 | 3.607510  | 1.484472  |
| H | -1.443512 | 2.458758  | -0.251263 |
| C | -1.551075 | 4.063546  | 2.738499  |
| H | 0.035991  | 4.080454  | 4.194877  |
| H | -2.933889 | 3.858177  | 1.098697  |
| H | -2.219649 | 4.673578  | 3.336766  |
| C | 2.005306  | 0.861307  | 1.208135  |
| N | 2.677973  | 0.288171  | 1.953132  |
| H | 0.128650  | 1.350117  | -1.564081 |
| C | 1.203318  | -1.732326 | -0.251515 |
| C | 0.690473  | -3.687148 | 0.579389  |
| C | -1.262212 | -2.187402 | 0.195413  |
| H | -1.501658 | -1.635245 | -0.721737 |

|   |           |           |           |
|---|-----------|-----------|-----------|
| N | 1.983860  | -3.698693 | 0.439142  |
| N | 2.295975  | -2.477058 | -0.077306 |
| N | 0.174333  | -2.486838 | 0.179187  |
| C | -0.222286 | -4.815609 | 0.966177  |
| H | 0.162787  | -5.324111 | 1.850732  |
| H | -0.251175 | -5.529481 | 0.131091  |
| C | -2.068013 | -3.502987 | 0.258621  |
| O | -1.506783 | -4.328464 | 1.270952  |
| C | -3.057209 | -1.898426 | 1.699167  |
| C | -1.767691 | -1.445006 | 1.413609  |
| C | -1.176398 | -0.435244 | 2.154901  |
| C | -1.921681 | 0.176760  | 3.164734  |
| C | -3.224043 | -0.245591 | 3.429330  |
| C | -3.796169 | -1.297372 | 2.708390  |
| C | -3.431517 | -3.032361 | 0.771980  |
| H | -0.146975 | -0.134856 | 1.985841  |
| H | -3.792805 | 0.236024  | 4.218029  |
| H | -4.800652 | -1.640263 | 2.937596  |
| H | -4.039197 | -2.664476 | -0.065167 |
| H | -3.967297 | -3.848546 | 1.260823  |
| C | 3.697218  | -2.139034 | -0.215772 |
| C | 4.256942  | -1.978107 | -1.483165 |
| C | 4.448169  | -2.082986 | 0.969721  |
| C | 5.614546  | -1.653273 | -1.538988 |
| C | 5.793537  | -1.751424 | 0.849053  |
| C | 6.390542  | -1.516677 | -0.393534 |
| H | 6.071832  | -1.518945 | -2.515521 |
| H | 6.396674  | -1.690321 | 1.751488  |
| C | 3.880644  | -2.437057 | 2.320131  |
| H | 3.948365  | -3.517325 | 2.480587  |
| H | 2.836661  | -2.140742 | 2.427384  |
| H | 4.449716  | -1.934787 | 3.103862  |
| C | 7.845506  | -1.137697 | -0.476583 |
| H | 8.453214  | -1.773615 | 0.173903  |
| H | 7.989860  | -0.101249 | -0.151941 |
| H | 8.220868  | -1.227137 | -1.499494 |
| C | 3.491729  | -2.151977 | -2.765881 |
| H | 3.160436  | -1.180893 | -3.142036 |
| H | 2.607577  | -2.781675 | -2.645618 |
| H | 4.140895  | -2.608376 | -3.516536 |
| H | -2.097419 | -4.030727 | -0.702163 |
| H | -1.477565 | 0.982790  | 3.741024  |
| C | 3.916776  | 2.856225  | -2.233554 |
| C | 3.058456  | 1.978225  | -1.370065 |

|   |           |           |           |
|---|-----------|-----------|-----------|
| H | 3.291297  | 3.293329  | -3.018257 |
| H | 4.339692  | 3.677308  | -1.648519 |
| H | 4.708289  | 2.261467  | -2.687182 |
| C | 2.089909  | 2.675558  | -0.414327 |
| C | 1.245161  | 3.713897  | -1.140877 |
| H | 2.686925  | 3.200552  | 0.340349  |
| O | 1.118383  | 4.824231  | -0.432522 |
| O | 3.124951  | 0.766817  | -1.392144 |
| O | 0.719008  | 3.507772  | -2.212328 |
| C | 0.158311  | 5.787522  | -0.923873 |
| C | -0.043196 | 6.803890  | 0.175033  |
| H | 0.552803  | 6.229330  | -1.842598 |
| H | -0.763883 | 5.251608  | -1.165872 |
| H | -0.771872 | 7.551104  | -0.146229 |
| H | -0.418269 | 6.311230  | 1.075814  |
| H | 0.894411  | 7.311105  | 0.411953  |
| C | -3.122153 | -0.113230 | -2.320319 |
| C | -4.392813 | -0.559789 | -2.634406 |
| C | -5.426982 | -0.433942 | -1.675375 |
| C | -5.060270 | 0.146274  | -0.438485 |
| C | -3.751548 | 0.551198  | -0.241132 |
| H | -2.326417 | -0.210407 | -3.057352 |
| H | -4.573363 | -0.995518 | -3.608306 |
| H | -5.777803 | 0.276684  | 0.361361  |
| H | -3.463983 | 0.984029  | 0.717807  |
| C | -7.713012 | -0.730102 | -0.898972 |
| C | -7.019552 | -1.447830 | -3.211160 |
| H | -7.865948 | 0.315693  | -0.609509 |
| H | -8.654413 | -1.118543 | -1.283246 |
| H | -7.445278 | -1.301481 | -0.002218 |
| H | -6.821739 | -0.752779 | -4.034778 |
| H | -6.443027 | -2.363895 | -3.386073 |
| H | -8.077842 | -1.702012 | -3.227212 |
| N | -6.695199 | -0.850455 | -1.927646 |
| N | -2.771339 | 0.438103  | -1.148226 |
| H | -0.612485 | 0.513353  | -0.230117 |

Vibrational frequencies

|         |         |         |
|---------|---------|---------|
| 12.9871 | 16.7472 | 21.6923 |
| 32.1149 | 33.2137 | 38.2262 |
| 43.9934 | 45.9593 | 50.1622 |
| 53.5427 | 57.0151 | 60.8839 |
| 63.6236 | 66.3130 | 69.2000 |
| 79.1312 | 82.1652 | 83.4636 |
| 85.9056 | 91.6003 | 96.1144 |

|           |           |           |
|-----------|-----------|-----------|
| 99.7927   | 103.8671  | 109.7217  |
| 118.3054  | 122.2990  | 126.9827  |
| 136.3941  | 141.3413  | 150.3208  |
| 153.8640  | 154.8892  | 159.4120  |
| 174.4817  | 176.9826  | 191.0229  |
| 194.2250  | 205.5503  | 212.5492  |
| 219.2828  | 220.9119  | 223.3728  |
| 233.8739  | 238.9069  | 259.1211  |
| 262.6966  | 266.2167  | 268.4540  |
| 277.7256  | 283.6062  | 288.5376  |
| 293.7348  | 299.1709  | 310.2436  |
| 322.8356  | 333.0213  | 346.7886  |
| 354.0038  | 365.6318  | 375.5951  |
| 393.1096  | 394.8783  | 405.0531  |
| 414.4759  | 416.8543  | 427.1736  |
| 431.2487  | 442.0962  | 462.9715  |
| 471.2050  | 479.0706  | 486.6784  |
| 491.6942  | 499.3260  | 502.0590  |
| 515.2506  | 523.2272  | 526.0723  |
| 550.3950  | 551.8386  | 560.2357  |
| 569.0335  | 572.2499  | 578.9843  |
| 584.1468  | 591.0008  | 612.0363  |
| 623.9374  | 627.8464  | 640.5881  |
| 650.7634  | 671.0826  | 678.3539  |
| 693.9455  | 705.2041  | 720.4740  |
| 722.6052  | 737.3125  | 746.3787  |
| 751.5922  | 757.3400  | 771.7216  |
| 777.5218  | 778.3290  | 790.4608  |
| 793.8769  | 803.6741  | 813.6669  |
| 835.2681  | 839.8620  | 840.1395  |
| 849.7173  | 860.8490  | 875.4106  |
| 877.0020  | 878.9618  | 891.3058  |
| 897.6486  | 905.8507  | 914.5118  |
| 924.9716  | 925.9982  | 956.3160  |
| 962.4442  | 963.9664  | 971.1142  |
| 980.3746  | 985.4181  | 989.9401  |
| 990.8286  | 1000.4600 | 1007.0139 |
| 1011.2271 | 1015.5524 | 1016.3271 |
| 1023.4478 | 1028.0169 | 1031.2909 |
| 1032.5595 | 1034.8520 | 1045.4523 |
| 1046.6525 | 1048.6196 | 1050.7069 |
| 1055.4520 | 1058.6602 | 1062.7846 |
| 1067.4342 | 1068.8385 | 1075.1567 |
| 1076.8293 | 1079.6426 | 1093.3165 |

|           |           |           |
|-----------|-----------|-----------|
| 1097.2194 | 1103.7064 | 1112.1458 |
| 1119.4197 | 1124.9183 | 1141.6002 |
| 1145.8428 | 1149.4122 | 1150.4507 |
| 1160.8987 | 1174.9399 | 1177.1200 |
| 1182.4798 | 1183.3659 | 1185.8604 |
| 1196.7149 | 1205.1863 | 1210.5373 |
| 1211.9482 | 1218.5377 | 1220.9975 |
| 1233.0385 | 1236.7198 | 1250.5078 |
| 1253.3206 | 1262.0474 | 1263.4728 |
| 1282.4237 | 1284.2850 | 1288.3355 |
| 1298.9577 | 1309.4765 | 1314.4817 |
| 1321.5309 | 1326.8421 | 1334.2587 |
| 1336.1002 | 1343.2203 | 1352.3157 |
| 1356.7923 | 1367.9717 | 1373.4874 |
| 1376.0270 | 1377.9931 | 1380.5237 |
| 1384.7850 | 1388.0943 | 1394.9879 |
| 1401.8650 | 1406.4776 | 1412.2524 |
| 1416.2219 | 1422.6934 | 1431.3525 |
| 1433.0503 | 1448.8890 | 1454.3769 |
| 1461.3008 | 1467.1093 | 1469.8214 |
| 1471.8504 | 1473.6063 | 1474.0754 |
| 1475.9986 | 1486.7067 | 1487.8575 |
| 1491.5524 | 1491.9846 | 1493.3391 |
| 1493.3581 | 1494.5448 | 1498.7124 |
| 1500.3274 | 1501.8438 | 1502.4510 |
| 1505.3156 | 1509.4633 | 1515.1727 |
| 1520.0325 | 1523.1283 | 1525.5476 |
| 1527.1186 | 1535.4744 | 1536.5706 |
| 1552.8004 | 1574.4703 | 1586.9410 |
| 1622.1312 | 1668.3107 | 1677.4556 |
| 1680.5906 | 1689.5852 | 1691.1432 |
| 1691.9436 | 1695.5752 | 1702.6029 |
| 1842.5854 | 1852.3494 | 1864.1226 |
| 2417.2599 | 3047.5431 | 3054.7215 |
| 3061.5594 | 3067.1920 | 3072.1044 |
| 3075.7338 | 3077.3923 | 3079.1709 |
| 3080.6643 | 3088.5941 | 3101.4296 |
| 3103.2083 | 3109.5030 | 3109.6196 |
| 3111.1645 | 3113.8517 | 3134.4947 |
| 3150.7797 | 3154.4575 | 3155.8748 |
| 3157.5597 | 3159.3229 | 3162.9121 |
| 3163.1069 | 3164.1693 | 3169.1593 |
| 3171.4694 | 3176.9366 | 3178.6996 |
| 3181.8708 | 3188.5902 | 3193.6657 |



|           |           |           |
|-----------|-----------|-----------|
| 3199.5036 | 3200.8351 | 3202.6981 |
| 3204.2390 | 3206.9557 | 3208.2521 |
| 3214.1515 | 3217.3144 | 3217.6155 |
| 3224.9723 | 3226.2255 | 3233.6413 |
| 3240.0824 | 3257.4582 | 3263.0799 |

### TS7R

Zero-point correction= 0.844364

Thermal correction to Energy= 0.895753

Thermal correction to Enthalpy= 0.896697

Thermal correction to Gibbs Free Energy= 0.757855

Sum of electronic and zero-point Energies= -2407.662993

Sum of electronic and thermal Energies= -2407.611604

Sum of electronic and thermal Enthalpies= -2407.610660

Sum of electronic and thermal Free Energies= -2407.749502

Cartesian coordinates

|   |           |           |           |
|---|-----------|-----------|-----------|
| C | -2.055695 | 0.406464  | 1.435000  |
| C | -0.711368 | 1.062420  | 1.669448  |
| C | 0.519821  | 0.546817  | 0.829485  |
| O | -2.621383 | -0.258496 | 2.267929  |
| C | 1.319954  | 1.697480  | 0.172600  |
| C | 1.975265  | 1.488121  | -1.046625 |
| C | 1.492253  | 2.923453  | 0.819706  |
| C | 2.786026  | 2.474008  | -1.600982 |
| H | 1.852398  | 0.548454  | -1.577499 |
| C | 2.318135  | 3.902865  | 0.272337  |
| H | 1.016581  | 3.110655  | 1.774882  |
| C | 2.967707  | 3.685227  | -0.938619 |
| H | 3.278344  | 2.288247  | -2.550383 |
| H | 2.444300  | 4.845084  | 0.796901  |
| H | 3.607720  | 4.452330  | -1.363328 |
| C | 0.020960  | -0.310484 | -0.270507 |
| N | -0.362418 | -0.938594 | -1.164545 |
| H | -0.497852 | 0.911752  | 2.727321  |
| C | -2.837012 | 0.619916  | 0.140994  |
| C | -4.357335 | 0.406179  | -1.404807 |
| C | -4.611251 | -1.232904 | 0.455696  |
| H | -4.715520 | -0.929183 | 1.498848  |
| N | -3.654590 | 1.447225  | -1.755354 |
| N | -2.719077 | 1.572841  | -0.786749 |
| N | -3.901320 | -0.126988 | -0.233830 |
| C | -5.576081 | -0.128180 | -2.093216 |
| H | -5.388307 | -0.202889 | -3.165182 |
| H | -6.405634 | 0.573760  | -1.926951 |

|   |           |           |           |
|---|-----------|-----------|-----------|
| C | -6.002906 | -1.441216 | -0.194280 |
| O | -5.876832 | -1.409191 | -1.607952 |
| C | -4.998066 | -3.553481 | 0.208120  |
| C | -3.982521 | -2.603138 | 0.335884  |
| C | -2.647778 | -2.967165 | 0.387160  |
| C | -2.333054 | -4.324171 | 0.304073  |
| C | -3.338701 | -5.281610 | 0.178464  |
| C | -4.681874 | -4.902922 | 0.130160  |
| C | -6.351757 | -2.882777 | 0.179680  |
| H | -1.856359 | -2.237355 | 0.497164  |
| H | -3.076199 | -6.332740 | 0.113511  |
| H | -5.463146 | -5.649118 | 0.023212  |
| H | -6.829976 | -2.910618 | 1.164862  |
| H | -7.044985 | -3.307282 | -0.549645 |
| C | -1.896838 | 2.759853  | -0.808110 |
| C | -2.145795 | 3.741071  | 0.161257  |
| C | -1.007533 | 2.932851  | -1.872414 |
| C | -1.387253 | 4.906220  | 0.087964  |
| C | -0.290386 | 4.127134  | -1.902392 |
| C | -0.457726 | 5.114934  | -0.933211 |
| H | -1.543763 | 5.678874  | 0.835805  |
| H | 0.429990  | 4.280162  | -2.701664 |
| C | -0.848583 | 1.918966  | -2.972748 |
| H | -1.597267 | 2.092303  | -3.752004 |
| H | -0.970526 | 0.895740  | -2.614675 |
| H | 0.142849  | 2.012983  | -3.420811 |
| C | 0.332987  | 6.393048  | -1.005411 |
| H | -0.167825 | 7.117495  | -1.655669 |
| H | 1.328687  | 6.208025  | -1.415978 |
| H | 0.440945  | 6.848520  | -0.018670 |
| C | -3.202350 | 3.575770  | 1.225343  |
| H | -2.885931 | 2.912183  | 2.038366  |
| H | -4.131555 | 3.174919  | 0.809190  |
| H | -3.427335 | 4.543175  | 1.675552  |
| H | -6.737062 | -0.697511 | 0.139561  |
| H | -1.292309 | -4.629131 | 0.343696  |
| C | 1.497042  | -0.320957 | 1.655530  |
| C | 0.928209  | -1.574839 | 2.163694  |
| C | 2.291862  | 0.430933  | 2.658908  |
| H | 2.515342  | -0.843843 | 0.743335  |
| C | 1.766010  | -2.461885 | 3.063166  |
| O | -0.197244 | -1.940564 | 1.828045  |
| O | 3.474663  | -0.165966 | 2.900904  |
| O | 1.958481  | 1.453925  | 3.225008  |

|   |           |           |           |
|---|-----------|-----------|-----------|
| H | 1.915326  | -1.989113 | 4.038802  |
| H | 1.240843  | -3.407278 | 3.196153  |
| H | 2.757112  | -2.628752 | 2.634454  |
| C | 4.254147  | 0.382910  | 3.977474  |
| C | 5.477314  | -0.492852 | 4.130734  |
| H | 4.513436  | 1.416563  | 3.732654  |
| H | 3.641567  | 0.396061  | 4.883863  |
| H | 6.063721  | -0.501364 | 3.208776  |
| H | 6.106954  | -0.113940 | 4.938657  |
| H | 5.187355  | -1.519089 | 4.368590  |
| C | 4.561789  | -0.753467 | -0.205733 |
| C | 5.474441  | -1.222845 | -1.119077 |
| C | 5.138714  | -2.334471 | -1.939495 |
| C | 3.842852  | -2.890552 | -1.761806 |
| C | 2.998344  | -2.349943 | -0.822745 |
| H | 4.781277  | 0.092147  | 0.438658  |
| H | 6.436751  | -0.735729 | -1.194088 |
| H | 3.502320  | -3.731205 | -2.349934 |
| H | 1.997336  | -2.743029 | -0.664083 |
| C | 5.624400  | -3.976451 | -3.662896 |
| C | 7.322977  | -2.235737 | -2.999103 |
| H | 4.761875  | -3.739285 | -4.294250 |
| H | 6.459880  | -4.242222 | -4.306804 |
| H | 5.378952  | -4.843619 | -3.041460 |
| H | 7.246065  | -1.185228 | -3.297738 |
| H | 7.897379  | -2.297125 | -2.068986 |
| H | 7.864847  | -2.772763 | -3.774516 |
| N | 6.004905  | -2.834763 | -2.842524 |
| N | 3.348247  | -1.306705 | -0.053848 |
| H | -0.826378 | 2.133650  | 1.495776  |

Vibrational frequencies

|           |          |          |
|-----------|----------|----------|
| -931.5579 | 13.1786  | 17.5961  |
| 25.9001   | 31.4034  | 31.8820  |
| 34.6063   | 39.4356  | 51.0226  |
| 53.7593   | 62.1284  | 66.7797  |
| 69.7117   | 73.7213  | 78.6000  |
| 82.2488   | 88.8140  | 90.0212  |
| 95.0632   | 100.5871 | 103.0628 |
| 107.2988  | 113.8383 | 116.1474 |
| 120.5932  | 127.9237 | 133.6795 |
| 136.2283  | 139.1501 | 142.1010 |
| 159.6280  | 162.5466 | 168.9907 |
| 178.5572  | 185.9493 | 191.8011 |
| 193.6336  | 201.3742 | 205.2642 |

|           |           |           |
|-----------|-----------|-----------|
| 210.0834  | 216.6130  | 224.1034  |
| 233.3499  | 236.8268  | 240.2654  |
| 248.6441  | 252.2194  | 265.8859  |
| 274.2036  | 276.4151  | 289.9201  |
| 292.9379  | 298.5754  | 304.0393  |
| 314.8907  | 326.9367  | 334.4326  |
| 343.0288  | 355.9999  | 366.6957  |
| 388.0801  | 391.5310  | 398.7734  |
| 408.7668  | 416.5825  | 425.9539  |
| 427.7320  | 428.0487  | 435.2939  |
| 443.1007  | 478.5744  | 482.2523  |
| 490.7155  | 495.7248  | 508.2962  |
| 518.4604  | 528.7960  | 533.1980  |
| 537.2425  | 554.8513  | 556.8507  |
| 560.7039  | 577.7586  | 583.3531  |
| 585.2534  | 587.8931  | 594.7246  |
| 606.0807  | 630.6258  | 632.2850  |
| 647.5356  | 651.7117  | 668.0252  |
| 671.7858  | 699.8292  | 714.5032  |
| 716.0161  | 725.1499  | 728.4812  |
| 743.1191  | 747.0698  | 752.8798  |
| 765.5389  | 770.2050  | 783.0756  |
| 798.2593  | 805.4811  | 806.8851  |
| 814.4202  | 824.4069  | 842.3652  |
| 843.6855  | 854.6910  | 861.4385  |
| 865.2727  | 870.0129  | 877.9314  |
| 881.2352  | 898.6259  | 906.0974  |
| 920.6174  | 923.0498  | 929.6290  |
| 948.2495  | 961.8137  | 968.8430  |
| 977.7770  | 983.1572  | 984.6756  |
| 987.3680  | 990.6730  | 996.3268  |
| 1002.0373 | 1005.6064 | 1018.9597 |
| 1020.9976 | 1022.0951 | 1022.7206 |
| 1031.2268 | 1040.8562 | 1043.5323 |
| 1048.4271 | 1049.2720 | 1058.0289 |
| 1059.2327 | 1062.0652 | 1064.4596 |
| 1065.6792 | 1070.7657 | 1071.2831 |
| 1078.7698 | 1080.8463 | 1082.8874 |
| 1098.3477 | 1105.4739 | 1119.6268 |
| 1131.2854 | 1132.2967 | 1139.6878 |
| 1144.6505 | 1148.4295 | 1152.5596 |
| 1154.5262 | 1158.2391 | 1176.5170 |
| 1179.9532 | 1183.8194 | 1187.3226 |
| 1189.2880 | 1194.6187 | 1214.9935 |

|           |           |           |
|-----------|-----------|-----------|
| 1215.8065 | 1219.7480 | 1224.9276 |
| 1227.1686 | 1241.9733 | 1243.2046 |
| 1251.6089 | 1260.5683 | 1277.1845 |
| 1279.0512 | 1285.0221 | 1287.5050 |
| 1295.9458 | 1300.8206 | 1309.7152 |
| 1320.5233 | 1327.8260 | 1333.9314 |
| 1341.4728 | 1343.3277 | 1351.5219 |
| 1353.4275 | 1356.7500 | 1362.3660 |
| 1368.3530 | 1372.9359 | 1380.4482 |
| 1382.6071 | 1383.7493 | 1395.2080 |
| 1404.4798 | 1410.4515 | 1421.0363 |
| 1423.2422 | 1425.9867 | 1433.9160 |
| 1442.0251 | 1445.4211 | 1451.2203 |
| 1457.1659 | 1463.1400 | 1466.5980 |
| 1468.2379 | 1473.5621 | 1474.9903 |
| 1484.0052 | 1484.5030 | 1490.1793 |
| 1491.9593 | 1492.2146 | 1494.7670 |
| 1495.6454 | 1497.1349 | 1501.7462 |
| 1502.8797 | 1504.5888 | 1505.0164 |
| 1509.5199 | 1514.2130 | 1517.2486 |
| 1522.1991 | 1523.6492 | 1533.5838 |
| 1535.2559 | 1539.5314 | 1540.8203 |
| 1550.5341 | 1569.0476 | 1591.6911 |
| 1612.0601 | 1661.0133 | 1670.9298 |
| 1675.9343 | 1683.1876 | 1688.1832 |
| 1694.5848 | 1695.0771 | 1709.6676 |
| 1709.8241 | 1750.7390 | 1814.1344 |
| 1855.1367 | 2398.5361 | 3058.4517 |
| 3062.5277 | 3064.4092 | 3070.8245 |
| 3072.3074 | 3080.2308 | 3082.6498 |
| 3084.8905 | 3086.5613 | 3099.8172 |
| 3102.7312 | 3127.5330 | 3131.0389 |
| 3134.4401 | 3134.9312 | 3146.1726 |
| 3148.3725 | 3155.1383 | 3159.1891 |
| 3160.8579 | 3161.4507 | 3165.8642 |
| 3171.3336 | 3172.2255 | 3172.4441 |
| 3175.3213 | 3188.9432 | 3193.4688 |
| 3193.9674 | 3200.1781 | 3201.6570 |
| 3205.5543 | 3206.4700 | 3210.1250 |
| 3210.5168 | 3215.0930 | 3216.5284 |
| 3221.0378 | 3224.7609 | 3225.6982 |
| 3232.0767 | 3233.9631 | 3250.5357 |
| 3267.8704 | 3273.3868 | 3285.3352 |

TS7R<sup>b</sup>

Zero-point correction= 0.831902

Thermal correction to Energy= 0.882336

Thermal correction to Enthalpy= 0.883280

Thermal correction to Gibbs Free Energy= 0.748123

Sum of electronic and zero-point Energies= -2407.173253

Sum of electronic and thermal Energies= -2407.122818

Sum of electronic and thermal Enthalpies= -2407.121874

Sum of electronic and thermal Free Energies= -2407.257031

Cartesian coordinates

|   |           |           |           |
|---|-----------|-----------|-----------|
| C | -0.512926 | 0.434024  | 1.052282  |
| C | 0.075483  | -0.620121 | 0.288879  |
| C | -0.395648 | -1.151621 | -1.114579 |
| O | -0.464552 | 0.514157  | 2.288605  |
| C | 0.629913  | -0.923370 | -2.251861 |
| C | 0.232381  | -0.521270 | -3.531184 |
| C | 1.989451  | -1.173510 | -2.034925 |
| C | 1.160015  | -0.364249 | -4.559687 |
| H | -0.810302 | -0.297145 | -3.735276 |
| C | 2.917605  | -1.007964 | -3.059660 |
| H | 2.300815  | -1.548124 | -1.068430 |
| C | 2.511364  | -0.597926 | -4.328256 |
| H | 0.819410  | -0.043614 | -5.539969 |
| H | 3.967302  | -1.213031 | -2.864686 |
| H | 3.238133  | -0.469099 | -5.124336 |
| C | -1.596120 | -0.356952 | -1.455895 |
| N | -2.508414 | 0.318886  | -1.685259 |
| H | 0.183944  | -1.455458 | 0.977276  |
| C | -1.202618 | 1.646794  | 0.451068  |
| C | -2.692157 | 3.198570  | 0.146077  |
| C | -3.288328 | 1.504148  | 1.913143  |
| H | -2.652256 | 1.418389  | 2.798088  |
| N | -1.696886 | 3.530957  | -0.624190 |
| N | -0.770886 | 2.553754  | -0.418183 |
| N | -2.419076 | 2.056750  | 0.849108  |
| C | -3.986174 | 3.921275  | 0.351912  |
| H | -4.383796 | 4.250888  | -0.608626 |
| H | -3.815344 | 4.801414  | 0.988100  |
| C | -4.455884 | 2.499323  | 2.163823  |
| O | -4.912818 | 3.038953  | 0.932523  |
| C | -5.317506 | 0.281853  | 2.061978  |
| C | -3.997247 | 0.195141  | 1.615301  |
| C | -3.504070 | -0.996764 | 1.094584  |
| C | -4.368641 | -2.082191 | 0.952839  |

|   |           |           |           |
|---|-----------|-----------|-----------|
| C | -5.698034 | -1.980726 | 1.364462  |
| C | -6.176642 | -0.803365 | 1.937960  |
| C | -5.587338 | 1.623187  | 2.699125  |
| H | -2.468975 | -1.115096 | 0.795980  |
| H | -6.363724 | -2.830031 | 1.247400  |
| H | -7.205110 | -0.731834 | 2.279074  |
| H | -5.527720 | 1.552247  | 3.790459  |
| H | -6.555437 | 2.056991  | 2.438503  |
| C | 0.513302  | 2.611188  | -1.066741 |
| C | 1.652046  | 2.752682  | -0.263869 |
| C | 0.561781  | 2.591326  | -2.466030 |
| C | 2.886326  | 2.763657  | -0.911687 |
| C | 1.824447  | 2.594702  | -3.054027 |
| C | 2.994007  | 2.644378  | -2.296826 |
| H | 3.786841  | 2.866694  | -0.311381 |
| H | 1.891684  | 2.545961  | -4.137665 |
| C | -0.669482 | 2.632418  | -3.331157 |
| H | -1.017110 | 3.665134  | -3.433905 |
| H | -1.491438 | 2.048608  | -2.915130 |
| H | -0.433340 | 2.248357  | -4.325655 |
| C | 4.338098  | 2.560587  | -2.968104 |
| H | 4.369485  | 3.174236  | -3.871851 |
| H | 4.535143  | 1.525108  | -3.268733 |
| H | 5.140793  | 2.880934  | -2.300366 |
| C | 1.574771  | 2.963726  | 1.227434  |
| H | 1.299217  | 2.058554  | 1.773104  |
| H | 0.837513  | 3.734629  | 1.474614  |
| H | 2.547297  | 3.290132  | 1.600527  |
| H | -4.160241 | 3.311165  | 2.840148  |
| H | -3.990775 | -3.001197 | 0.512279  |
| C | -0.803903 | -2.644718 | -0.951036 |
| C | -2.014831 | -3.212278 | -1.487297 |
| C | 0.167292  | -3.466245 | -0.287800 |
| C | -2.704908 | -2.598572 | -2.709704 |
| O | -2.555647 | -4.242739 | -1.052821 |
| O | -0.173689 | -4.775624 | -0.121383 |
| O | 1.286660  | -3.096211 | 0.097931  |
| H | -2.055402 | -1.987599 | -3.336700 |
| H | -3.071770 | -3.443043 | -3.296393 |
| H | -3.567086 | -1.997535 | -2.407971 |
| C | 0.832405  | -5.596413 | 0.461761  |
| C | 0.257299  | -6.994304 | 0.565969  |
| H | 1.736033  | -5.578749 | -0.157195 |
| H | 1.109263  | -5.202605 | 1.445638  |

|   |           |           |           |
|---|-----------|-----------|-----------|
| H | -0.010834 | -7.373368 | -0.423084 |
| H | 0.989041  | -7.672603 | 1.012090  |
| H | -0.641543 | -6.992857 | 1.187155  |
| C | 3.791151  | 0.084389  | 0.474187  |
| C | 4.964551  | 0.221092  | 1.181098  |
| C | 4.962199  | 0.034455  | 2.587508  |
| C | 3.716747  | -0.302822 | 3.176768  |
| C | 2.598173  | -0.415118 | 2.383203  |
| H | 3.769884  | 0.220558  | -0.602509 |
| H | 5.871577  | 0.460994  | 0.642863  |
| H | 3.621579  | -0.475561 | 4.239860  |
| H | 1.626691  | -0.655433 | 2.805580  |
| C | 6.041900  | -0.051014 | 4.762866  |
| C | 7.344002  | 0.507829  | 2.678394  |
| H | 5.732198  | -1.074592 | 4.999404  |
| H | 7.035213  | 0.111122  | 5.176358  |
| H | 5.349189  | 0.645616  | 5.246718  |
| H | 7.638729  | -0.258200 | 1.952982  |
| H | 7.274510  | 1.471332  | 2.162267  |
| H | 8.122332  | 0.581507  | 3.435242  |
| N | 6.086132  | 0.167532  | 3.324923  |
| N | 2.619972  | -0.216709 | 1.054437  |
| H | 1.427337  | -0.321654 | 0.469699  |

Vibrational frequencies

|            |          |          |
|------------|----------|----------|
| -1300.4822 | 13.3037  | 21.1274  |
| 28.8383    | 36.4928  | 39.3986  |
| 39.8339    | 47.9572  | 53.8125  |
| 63.1436    | 64.3812  | 70.3626  |
| 75.1222    | 80.5937  | 83.0486  |
| 86.4934    | 91.6833  | 96.9759  |
| 102.5332   | 106.9627 | 109.3428 |
| 113.4788   | 114.2726 | 118.7716 |
| 130.0775   | 132.7803 | 137.5319 |
| 140.1626   | 151.9575 | 161.7777 |
| 168.7152   | 172.5729 | 177.3854 |
| 186.0560   | 187.0161 | 204.2652 |
| 207.3048   | 215.9113 | 216.6715 |
| 217.2225   | 230.9375 | 237.7257 |
| 247.9178   | 258.6842 | 263.4692 |
| 267.4753   | 273.1414 | 275.5538 |
| 282.9388   | 288.7837 | 290.3527 |
| 292.5609   | 300.9960 | 315.5397 |
| 322.6311   | 325.4571 | 336.5109 |
| 353.5522   | 373.4183 | 373.9035 |



|           |           |           |
|-----------|-----------|-----------|
| 393.2729  | 401.8633  | 416.3439  |
| 426.1591  | 432.1387  | 436.7628  |
| 438.6157  | 443.2943  | 446.9212  |
| 464.9102  | 477.0512  | 482.3559  |
| 490.1335  | 493.9745  | 506.1729  |
| 519.1102  | 521.3569  | 532.4597  |
| 535.8738  | 547.1498  | 562.4928  |
| 564.8736  | 581.2007  | 585.0428  |
| 588.9938  | 594.2880  | 611.1232  |
| 629.1998  | 631.6484  | 637.8648  |
| 639.8970  | 661.9213  | 670.4288  |
| 671.3006  | 685.3297  | 702.8757  |
| 725.5919  | 726.9043  | 745.6687  |
| 750.1233  | 751.1441  | 757.3405  |
| 770.5548  | 776.3163  | 784.6232  |
| 787.9037  | 796.7445  | 810.1824  |
| 824.4363  | 827.6341  | 838.8631  |
| 844.5939  | 850.4498  | 861.3830  |
| 868.4542  | 875.6269  | 881.4284  |
| 893.9044  | 896.9470  | 913.1642  |
| 915.0712  | 923.5045  | 931.1603  |
| 954.8453  | 966.7826  | 970.0500  |
| 978.2663  | 983.0330  | 985.6444  |
| 988.2248  | 991.4586  | 998.8082  |
| 1013.5295 | 1015.5783 | 1020.6192 |
| 1025.3953 | 1034.3248 | 1036.6211 |
| 1040.0069 | 1041.4772 | 1042.9144 |
| 1044.6392 | 1047.3827 | 1052.0769 |
| 1058.0056 | 1062.5381 | 1063.9661 |
| 1065.5607 | 1068.8958 | 1070.5572 |
| 1077.9112 | 1081.7388 | 1083.1271 |
| 1090.5153 | 1107.1434 | 1120.3307 |
| 1121.2903 | 1134.9577 | 1139.7422 |
| 1141.4489 | 1146.6096 | 1155.2776 |
| 1163.7489 | 1179.1108 | 1180.1231 |
| 1184.9419 | 1187.0522 | 1189.1241 |
| 1201.2065 | 1208.2268 | 1211.4563 |
| 1214.2559 | 1218.9426 | 1229.5983 |
| 1234.9812 | 1249.4851 | 1258.3808 |
| 1259.9160 | 1282.5441 | 1287.1951 |
| 1287.7139 | 1299.3353 | 1300.7785 |
| 1306.2414 | 1307.6743 | 1317.0828 |
| 1334.7555 | 1341.0788 | 1344.0312 |
| 1347.0100 | 1353.1537 | 1355.5740 |

|           |           |           |
|-----------|-----------|-----------|
| 1362.2505 | 1369.1909 | 1375.1734 |
| 1376.1953 | 1377.1243 | 1383.2746 |
| 1386.3959 | 1387.7994 | 1398.5337 |
| 1409.6454 | 1413.5321 | 1416.7171 |
| 1422.3853 | 1432.3062 | 1442.6171 |
| 1444.4078 | 1452.5448 | 1458.4388 |
| 1465.2244 | 1471.4297 | 1474.9756 |
| 1481.9027 | 1488.9379 | 1490.1108 |
| 1490.7436 | 1494.1031 | 1494.5022 |
| 1494.5818 | 1495.6487 | 1498.2452 |
| 1498.9046 | 1501.7157 | 1502.1361 |
| 1506.0206 | 1510.1852 | 1519.9260 |
| 1520.6160 | 1521.9029 | 1527.3825 |
| 1534.5503 | 1534.7366 | 1538.1365 |
| 1541.6688 | 1550.6831 | 1587.8579 |
| 1598.2803 | 1602.8166 | 1647.0673 |
| 1656.4918 | 1671.9318 | 1675.1269 |
| 1680.9738 | 1685.6228 | 1692.1898 |
| 1696.8065 | 1700.3662 | 1705.1671 |
| 1711.4254 | 1717.5011 | 2392.2169 |
| 3057.1749 | 3063.4314 | 3065.1066 |
| 3069.3678 | 3075.9042 | 3077.4984 |
| 3078.0160 | 3080.4494 | 3083.5068 |
| 3087.0205 | 3094.3466 | 3117.0134 |
| 3122.7926 | 3128.0081 | 3137.3591 |
| 3144.8554 | 3149.0479 | 3149.8767 |
| 3156.9122 | 3162.1540 | 3163.9078 |
| 3165.0626 | 3170.9772 | 3176.0475 |
| 3176.4587 | 3181.0523 | 3192.4817 |
| 3192.9424 | 3193.8830 | 3196.8329 |
| 3199.4009 | 3200.0951 | 3202.6928 |
| 3203.0193 | 3207.2674 | 3212.2270 |
| 3219.6626 | 3223.4221 | 3229.0223 |
| 3229.2549 | 3230.3135 | 3236.8501 |
| 3262.3294 | 3264.9973 | 3266.2529 |

### TS7S

Zero-point correction= 0.844271

Thermal correction to Energy= 0.895748

Thermal correction to Enthalpy= 0.896692

Thermal correction to Gibbs Free Energy= 0.756940

Sum of electronic and zero-point Energies= -2407.649968

Sum of electronic and thermal Energies= -2407.598492

Sum of electronic and thermal Enthalpies= -2407.597547

Sum of electronic and thermal Free Energies= -2407.737300

Cartesian coordinates

|   |           |           |           |
|---|-----------|-----------|-----------|
| C | -1.865866 | 0.533228  | 1.676326  |
| C | -1.317470 | -0.871187 | 1.582560  |
| C | 0.035133  | -1.157691 | 0.865199  |
| O | -2.447083 | 0.921554  | 2.660096  |
| C | 0.077017  | -2.626683 | 0.405571  |
| C | 0.666542  | -2.993004 | -0.805448 |
| C | -0.417903 | -3.625074 | 1.249165  |
| C | 0.752508  | -4.334754 | -1.170759 |
| H | 1.058805  | -2.233291 | -1.474918 |
| C | -0.324884 | -4.965694 | 0.885582  |
| H | -0.863130 | -3.370091 | 2.206273  |
| C | 0.257288  | -5.325749 | -0.327462 |
| H | 1.208828  | -4.601979 | -2.118515 |
| H | -0.713691 | -5.727419 | 1.553277  |
| H | 0.323576  | -6.370443 | -0.612601 |
| C | 0.118812  | -0.310999 | -0.341135 |
| N | 0.174824  | 0.284382  | -1.330838 |
| H | -1.242055 | -1.206859 | 2.619868  |
| C | -2.162881 | 1.394611  | 0.422716  |
| C | -3.535628 | 2.226033  | -1.065249 |
| C | -4.272185 | 0.053699  | -0.089951 |
| H | -4.314493 | -0.173798 | 0.981474  |
| N | -2.591434 | 3.108659  | -0.933459 |
| N | -1.738466 | 2.585349  | -0.006585 |
| N | -3.303812 | 1.148435  | -0.255815 |
| C | -4.817411 | 2.352623  | -1.836384 |
| H | -4.610127 | 2.639451  | -2.868162 |
| H | -5.420465 | 3.140401  | -1.364314 |
| C | -5.660444 | 0.527384  | -0.581241 |
| O | -5.502875 | 1.124673  | -1.860066 |
| C | -5.309961 | -1.716177 | -1.258008 |
| C | -4.056802 | -1.198661 | -0.919235 |
| C | -2.888894 | -1.835854 | -1.310897 |
| C | -2.984156 | -3.043757 | -2.003677 |
| C | -4.231974 | -3.583503 | -2.309098 |
| C | -5.404707 | -2.915366 | -1.950259 |
| C | -6.411741 | -0.786684 | -0.799942 |
| H | -1.913314 | -1.400841 | -1.126180 |
| H | -4.293614 | -4.521956 | -2.850221 |
| H | -6.374799 | -3.320224 | -2.221759 |
| H | -6.861268 | -1.124311 | 0.140158  |
| H | -7.207569 | -0.656789 | -1.536153 |

|   |           |           |           |
|---|-----------|-----------|-----------|
| C | -0.566723 | 3.373306  | 0.322383  |
| C | -0.475950 | 3.957700  | 1.589872  |
| C | 0.384789  | 3.584454  | -0.681975 |
| C | 0.670997  | 4.694475  | 1.873419  |
| C | 1.522635  | 4.314335  | -0.331149 |
| C | 1.692474  | 4.861878  | 0.939086  |
| H | 0.766556  | 5.147814  | 2.857052  |
| H | 2.284414  | 4.477290  | -1.090545 |
| C | 0.218095  | 3.164254  | -2.120078 |
| H | -0.044108 | 4.042880  | -2.717897 |
| H | -0.548322 | 2.408716  | -2.264590 |
| H | 1.158881  | 2.760281  | -2.501738 |
| C | 2.918837  | 5.668966  | 1.275680  |
| H | 2.740879  | 6.732857  | 1.089358  |
| H | 3.772312  | 5.363559  | 0.666585  |
| H | 3.185799  | 5.558943  | 2.329136  |
| C | -1.536097 | 3.806777  | 2.644527  |
| H | -1.301022 | 2.955493  | 3.287689  |
| H | -2.528321 | 3.639241  | 2.219882  |
| H | -1.572916 | 4.707486  | 3.260325  |
| H | -6.140846 | 1.221676  | 0.118396  |
| H | -2.075718 | -3.555661 | -2.305756 |
| C | 2.095497  | 0.820531  | 3.536712  |
| C | 1.133695  | 0.464080  | 2.430047  |
| H | 1.710921  | 0.415386  | 4.476878  |
| H | 3.083177  | 0.383908  | 3.368029  |
| H | 2.166197  | 1.906077  | 3.610178  |
| C | 1.247225  | -0.824697 | 1.772779  |
| C | 1.716900  | -1.960732 | 2.626926  |
| H | 2.314704  | -0.620303 | 0.874102  |
| O | 2.509143  | -2.800181 | 1.941471  |
| O | 0.313354  | 1.306018  | 2.040095  |
| O | 1.439810  | -2.133099 | 3.795815  |
| C | 2.861134  | -4.023705 | 2.610571  |
| C | 3.619624  | -4.871247 | 1.615247  |
| H | 3.457319  | -3.783050 | 3.495003  |
| H | 1.938374  | -4.510420 | 2.942644  |
| H | 3.899709  | -5.822415 | 2.073270  |
| H | 2.994440  | -5.074350 | 0.741485  |
| H | 4.531904  | -4.363789 | 1.290892  |
| C | 3.908257  | -1.358842 | -0.637045 |
| C | 4.770747  | -1.102852 | -1.677120 |
| C | 4.914899  | 0.225904  | -2.159172 |
| C | 4.134157  | 1.224706  | -1.517221 |

|   |           |           |           |
|---|-----------|-----------|-----------|
| C | 3.295787  | 0.868487  | -0.488140 |
| H | 3.764762  | -2.361086 | -0.243303 |
| H | 5.326086  | -1.923400 | -2.110076 |
| H | 4.176044  | 2.261082  | -1.824091 |
| H | 2.667557  | 1.606907  | 0.007311  |
| C | 5.871307  | 1.899005  | -3.638278 |
| C | 6.509872  | -0.531691 | -3.828656 |
| H | 6.208525  | 2.555471  | -2.829634 |
| H | 6.607154  | 1.938099  | -4.438648 |
| H | 4.918731  | 2.276650  | -4.024859 |
| H | 7.202427  | -1.009628 | -3.127773 |
| H | 5.846927  | -1.296421 | -4.246071 |
| H | 7.087502  | -0.098387 | -4.642421 |
| N | 5.746468  | 0.523744  | -3.177933 |
| N | 3.185928  | -0.394347 | -0.046014 |
| H | -2.105385 | -1.469031 | 1.105472  |

Vibrational frequencies

|            |          |          |
|------------|----------|----------|
| -1084.5142 | 11.5965  | 20.5407  |
| 23.6749    | 31.6097  | 35.3465  |
| 38.7930    | 39.5854  | 43.1842  |
| 48.1036    | 52.3593  | 62.0571  |
| 66.6512    | 68.8777  | 72.7768  |
| 76.5908    | 80.6668  | 81.5140  |
| 88.7798    | 94.3281  | 97.0378  |
| 104.7450   | 107.5100 | 111.6572 |
| 116.2279   | 123.3284 | 127.2846 |
| 130.5841   | 138.4139 | 141.3683 |
| 148.2554   | 155.7099 | 166.3096 |
| 178.4969   | 183.0520 | 185.1175 |
| 189.0428   | 203.8590 | 208.4139 |
| 214.7469   | 218.3749 | 229.1070 |
| 238.3973   | 239.5693 | 249.8244 |
| 260.7740   | 265.2653 | 273.1840 |
| 274.8222   | 286.3557 | 288.2431 |
| 292.4517   | 295.6551 | 302.8817 |
| 315.8268   | 327.2271 | 338.9549 |
| 349.4910   | 357.9586 | 373.8169 |
| 385.7612   | 398.9269 | 408.8965 |
| 416.6875   | 417.7026 | 424.7646 |
| 434.8725   | 442.9375 | 450.6913 |
| 463.3004   | 477.2794 | 484.0990 |
| 489.2570   | 499.6271 | 503.4669 |
| 515.9042   | 523.6868 | 529.3352 |
| 532.3274   | 541.9030 | 552.7244 |

|           |           |           |
|-----------|-----------|-----------|
| 565.6223  | 577.4681  | 580.5541  |
| 581.6567  | 585.7073  | 588.1010  |
| 615.1562  | 627.9372  | 631.0633  |
| 640.8309  | 652.3410  | 669.0239  |
| 676.6919  | 684.3824  | 706.4498  |
| 720.4338  | 726.8667  | 742.7868  |
| 744.5011  | 748.9352  | 752.0249  |
| 770.1442  | 770.3164  | 787.3673  |
| 789.2220  | 798.4223  | 810.0119  |
| 813.1637  | 838.5183  | 838.9487  |
| 844.9305  | 849.7614  | 871.1768  |
| 874.6868  | 875.9685  | 879.6011  |
| 893.8873  | 900.2580  | 910.6647  |
| 922.2732  | 927.0879  | 942.8709  |
| 948.2314  | 963.3061  | 968.4748  |
| 971.2933  | 979.1856  | 984.3732  |
| 986.1285  | 993.0449  | 1006.1642 |
| 1012.1213 | 1016.6998 | 1017.1266 |
| 1019.6303 | 1024.0430 | 1029.6682 |
| 1033.0172 | 1042.7333 | 1043.4844 |
| 1047.2870 | 1052.4106 | 1057.5139 |
| 1060.4231 | 1061.2953 | 1061.8385 |
| 1063.4302 | 1067.8430 | 1067.9896 |
| 1075.7052 | 1078.8567 | 1092.1783 |
| 1093.2657 | 1113.4159 | 1114.8050 |
| 1118.4202 | 1124.6465 | 1141.6414 |
| 1146.9782 | 1149.7101 | 1154.2662 |
| 1158.2107 | 1164.6003 | 1179.0804 |
| 1179.3996 | 1182.4279 | 1184.0828 |
| 1185.8895 | 1196.4304 | 1208.1117 |
| 1214.1419 | 1218.6954 | 1219.5511 |
| 1234.0246 | 1235.7254 | 1247.7468 |
| 1253.8073 | 1263.9384 | 1281.6587 |
| 1286.7018 | 1287.5473 | 1290.8244 |
| 1303.1589 | 1307.1973 | 1309.0427 |
| 1317.1232 | 1326.2660 | 1335.8712 |
| 1340.3221 | 1342.2527 | 1346.7111 |
| 1356.3793 | 1359.0957 | 1366.7787 |
| 1371.6014 | 1376.7966 | 1381.1311 |
| 1383.0558 | 1386.6318 | 1396.4526 |
| 1403.3558 | 1410.0959 | 1415.4837 |
| 1421.5183 | 1434.3009 | 1436.0106 |
| 1444.5098 | 1445.0766 | 1453.8316 |
| 1457.2360 | 1466.4404 | 1466.8904 |

|           |           |           |
|-----------|-----------|-----------|
| 1467.6927 | 1475.9918 | 1477.4680 |
| 1483.3602 | 1490.4816 | 1490.5034 |
| 1491.9345 | 1492.6014 | 1494.8452 |
| 1498.0518 | 1499.9839 | 1500.2155 |
| 1501.1383 | 1502.7521 | 1503.2124 |
| 1505.4967 | 1507.0858 | 1517.4304 |
| 1518.5419 | 1522.0939 | 1525.4596 |
| 1532.6371 | 1539.0542 | 1539.5787 |
| 1550.4516 | 1571.6380 | 1589.0966 |
| 1608.5441 | 1659.6747 | 1670.8486 |
| 1676.6861 | 1682.9304 | 1688.2542 |
| 1694.8897 | 1695.1320 | 1706.6369 |
| 1712.0120 | 1730.1662 | 1823.4737 |
| 1837.9856 | 2413.4322 | 3061.2537 |
| 3067.6563 | 3072.3982 | 3072.5669 |
| 3073.3711 | 3078.8478 | 3085.7712 |
| 3089.4685 | 3092.1173 | 3095.0859 |
| 3100.0293 | 3106.7317 | 3112.7509 |
| 3129.2239 | 3132.1246 | 3143.9746 |
| 3145.1406 | 3152.1942 | 3157.3210 |
| 3162.8052 | 3163.6367 | 3166.3371 |
| 3167.7352 | 3168.1094 | 3174.5793 |
| 3177.0595 | 3179.0157 | 3191.3084 |
| 3193.8136 | 3196.1462 | 3201.8363 |
| 3203.8163 | 3204.2338 | 3205.5614 |
| 3205.9872 | 3209.6314 | 3211.6176 |
| 3220.0913 | 3224.1660 | 3226.3457 |
| 3230.9867 | 3235.1490 | 3239.9577 |
| 3257.8099 | 3263.3450 | 3269.5370 |

## M7R

Zero-point correction= 0.671505

Thermal correction to Energy= 0.712243

Thermal correction to Enthalpy= 0.713187

Thermal correction to Gibbs Free Energy= 0.598387

Sum of electronic and zero-point Energies= -2025.280701

Sum of electronic and thermal Energies= -2025.239963

Sum of electronic and thermal Enthalpies= -2025.239019

Sum of electronic and thermal Free Energies= -2025.353819

Cartesian coordinates

|   |           |           |           |
|---|-----------|-----------|-----------|
| C | 0.473482  | 0.331148  | -1.622545 |
| C | -1.037121 | 0.195045  | -1.435498 |
| C | -1.539450 | -0.818816 | -0.386207 |
| O | 0.874299  | 0.815271  | -2.731558 |

|   |           |           |           |
|---|-----------|-----------|-----------|
| C | -3.069718 | -0.791269 | -0.466634 |
| C | -3.799228 | 0.086866  | 0.333412  |
| C | -3.738153 | -1.575773 | -1.408202 |
| C | -5.186337 | 0.157427  | 0.215893  |
| H | -3.285614 | 0.718468  | 1.055408  |
| C | -5.122986 | -1.506141 | -1.523173 |
| H | -3.175081 | -2.252636 | -2.046470 |
| C | -5.853154 | -0.642136 | -0.707608 |
| H | -5.744624 | 0.835719  | 0.853488  |
| H | -5.632220 | -2.129341 | -2.251270 |
| H | -6.933519 | -0.591935 | -0.795118 |
| C | -1.107272 | -0.471840 | 0.985305  |
| N | -0.734965 | -0.316972 | 2.070470  |
| H | -1.398264 | -0.159607 | -2.405223 |
| C | 1.226485  | 1.198190  | -0.522234 |
| C | 2.971757  | 2.312188  | 0.217176  |
| C | 3.509593  | 0.096558  | -0.770009 |
| H | 3.197788  | -0.253042 | -1.757178 |
| N | 1.958220  | 3.082462  | 0.470528  |
| N | 0.877459  | 2.377279  | 0.011611  |
| N | 2.568761  | 1.146018  | -0.371848 |
| C | 4.429104  | 2.617582  | 0.397763  |
| H | 4.595440  | 3.091114  | 1.366052  |
| H | 4.737714  | 3.314889  | -0.394265 |
| C | 4.948303  | 0.656011  | -0.810541 |
| O | 5.187347  | 1.433412  | 0.356323  |
| C | 4.966318  | -1.476036 | 0.228210  |
| C | 3.639475  | -1.041500 | 0.221154  |
| C | 2.685534  | -1.619048 | 1.047210  |
| C | 3.073898  | -2.682629 | 1.863434  |
| C | 4.388783  | -3.148162 | 1.844706  |
| C | 5.348451  | -2.542037 | 1.031967  |
| C | 5.807905  | -0.604613 | -0.678825 |
| H | 1.663667  | -1.249112 | 1.073161  |
| H | 4.673501  | -3.977796 | 2.483804  |
| H | 6.378721  | -2.884831 | 1.044806  |
| H | 5.950997  | -1.064647 | -1.662752 |
| H | 6.790133  | -0.362122 | -0.267029 |
| C | -0.432332 | 2.934220  | 0.244727  |
| C | -1.121046 | 3.529347  | -0.820423 |
| C | -0.919078 | 2.922163  | 1.554279  |
| C | -2.409334 | 3.990270  | -0.564211 |
| C | -2.215587 | 3.402223  | 1.756006  |
| C | -2.983081 | 3.907281  | 0.708230  |



|   |           |           |           |
|---|-----------|-----------|-----------|
| H | -2.975965 | 4.436338  | -1.377721 |
| H | -2.626871 | 3.384293  | 2.762177  |
| C | -0.064916 | 2.512188  | 2.723970  |
| H | 0.521884  | 3.373050  | 3.060879  |
| H | 0.626262  | 1.707455  | 2.473483  |
| H | -0.689536 | 2.171847  | 3.551087  |
| C | -4.399793 | 4.365559  | 0.932545  |
| H | -4.588033 | 5.320122  | 0.434443  |
| H | -4.617091 | 4.480034  | 1.996241  |
| H | -5.104546 | 3.636859  | 0.519306  |
| C | -0.483460 | 3.694069  | -2.174042 |
| H | -0.144186 | 2.741295  | -2.592986 |
| H | 0.397143  | 4.340677  | -2.092536 |
| H | -1.185860 | 4.161002  | -2.866298 |
| H | 5.147677  | 1.248909  | -1.711929 |
| H | 2.345722  | -3.145843 | 2.521189  |
| C | -0.889377 | -2.163164 | -0.683957 |
| C | 0.375212  | -2.174129 | -1.181407 |
| C | -1.562088 | -3.405897 | -0.277642 |
| C | 1.182364  | -3.402015 | -1.487907 |
| O | 1.076868  | -1.066847 | -1.424607 |
| O | -2.385430 | -3.176047 | 0.758438  |
| O | -1.432461 | -4.503096 | -0.785848 |
| H | 0.884350  | -4.249188 | -0.874167 |
| H | 1.034524  | -3.675665 | -2.537063 |
| H | 2.237838  | -3.169510 | -1.335979 |
| C | -3.347620 | -4.194462 | 1.064595  |
| C | -4.434906 | -3.532317 | 1.882557  |
| H | -3.733984 | -4.603288 | 0.126425  |
| H | -2.851151 | -5.003947 | 1.608086  |
| H | -4.895865 | -2.723926 | 1.306963  |
| H | -5.203447 | -4.263186 | 2.144865  |
| H | -4.023080 | -3.113789 | 2.803897  |
| H | -1.489511 | 1.170192  | -1.257535 |

Vibrational frequencies

|          |          |          |
|----------|----------|----------|
| 20.1408  | 24.9552  | 28.5537  |
| 34.2794  | 38.8349  | 47.1484  |
| 58.8150  | 63.2744  | 65.4873  |
| 74.2206  | 76.3950  | 80.6264  |
| 90.2434  | 98.3863  | 106.6250 |
| 111.8203 | 115.7631 | 123.5991 |
| 127.1803 | 134.7234 | 141.1051 |
| 153.3599 | 163.5865 | 175.5017 |
| 180.3382 | 189.8530 | 198.8537 |

|           |           |           |
|-----------|-----------|-----------|
| 206.8375  | 215.7864  | 223.2103  |
| 238.4465  | 247.9767  | 253.0181  |
| 263.1573  | 270.2652  | 273.8424  |
| 279.6501  | 287.6787  | 293.1533  |
| 298.9774  | 321.2012  | 327.8966  |
| 333.2095  | 338.1017  | 341.5855  |
| 383.7453  | 389.9767  | 390.7273  |
| 414.6825  | 418.2998  | 420.7202  |
| 445.1596  | 453.2341  | 456.2619  |
| 469.2348  | 483.4696  | 494.5266  |
| 499.7702  | 505.7251  | 510.7073  |
| 531.0630  | 532.7740  | 540.5653  |
| 556.6391  | 579.7627  | 584.1321  |
| 587.7144  | 591.5982  | 604.6232  |
| 624.2029  | 629.1141  | 636.3903  |
| 645.4337  | 659.5152  | 679.4874  |
| 698.6223  | 702.7347  | 718.8964  |
| 729.4622  | 730.9057  | 752.3199  |
| 756.3226  | 765.7649  | 775.9530  |
| 782.6402  | 792.7993  | 805.3852  |
| 812.7121  | 840.5084  | 842.0295  |
| 871.7836  | 872.7141  | 874.9969  |
| 877.9976  | 880.8180  | 900.1013  |
| 910.3489  | 911.2867  | 924.2589  |
| 941.3034  | 946.9104  | 965.6537  |
| 968.8723  | 982.2316  | 991.5586  |
| 1001.5838 | 1010.2453 | 1017.2047 |
| 1019.5103 | 1021.0746 | 1024.6110 |
| 1030.0290 | 1037.9972 | 1042.8403 |
| 1048.5386 | 1050.4396 | 1055.3171 |
| 1058.8401 | 1063.5713 | 1066.2944 |
| 1068.4749 | 1071.3289 | 1072.0366 |
| 1078.7330 | 1080.7430 | 1111.5190 |
| 1115.9356 | 1117.4428 | 1125.0267 |
| 1135.6509 | 1148.6137 | 1167.4824 |
| 1175.7811 | 1178.0638 | 1184.0227 |
| 1188.2692 | 1190.0983 | 1203.0053 |
| 1205.8114 | 1206.3184 | 1217.9304 |
| 1236.3298 | 1254.5933 | 1256.9969 |
| 1259.7628 | 1282.3364 | 1285.5163 |
| 1288.5638 | 1307.9068 | 1309.4845 |
| 1312.5747 | 1321.0691 | 1334.9770 |
| 1338.4744 | 1341.6725 | 1343.8031 |
| 1356.6951 | 1359.3890 | 1360.6848 |

|           |           |           |
|-----------|-----------|-----------|
| 1365.8444 | 1370.8820 | 1379.1155 |
| 1386.2779 | 1406.3256 | 1412.4067 |
| 1417.4714 | 1420.5295 | 1426.7305 |
| 1442.6208 | 1444.3541 | 1451.7627 |
| 1459.5909 | 1465.0609 | 1473.1947 |
| 1476.8693 | 1477.5645 | 1480.5735 |
| 1483.3364 | 1488.0789 | 1492.3646 |
| 1493.5894 | 1493.9973 | 1497.6532 |
| 1500.6712 | 1503.4477 | 1506.9842 |
| 1519.1786 | 1521.1424 | 1524.4556 |
| 1526.4678 | 1532.4317 | 1537.9867 |
| 1547.1045 | 1561.7421 | 1676.8705 |
| 1681.2981 | 1684.1692 | 1685.2615 |
| 1686.6930 | 1694.4444 | 1696.3325 |
| 1706.8386 | 1820.8721 | 2398.8401 |
| 3061.8888 | 3062.8571 | 3072.0419 |
| 3073.3551 | 3079.6936 | 3083.0804 |
| 3092.2722 | 3097.8524 | 3102.8091 |
| 3122.0569 | 3132.6367 | 3140.3897 |
| 3143.6190 | 3145.1345 | 3152.8440 |
| 3158.3420 | 3159.3426 | 3160.1479 |
| 3166.3840 | 3167.8049 | 3171.5329 |
| 3178.2752 | 3182.8919 | 3185.1659 |
| 3191.0733 | 3193.3475 | 3198.2366 |
| 3201.0088 | 3205.1622 | 3208.9670 |
| 3211.0700 | 3214.2356 | 3214.8136 |
| 3219.7190 | 3230.6292 | 3230.6659 |

### M7S

Zero-point correction= 0.671945

Thermal correction to Energy= 0.712428

Thermal correction to Enthalpy= 0.713372

Thermal correction to Gibbs Free Energy= 0.597700

Sum of electronic and zero-point Energies= -2025.285709

Sum of electronic and thermal Energies= -2025.245225

Sum of electronic and thermal Enthalpies= -2025.244281

Sum of electronic and thermal Free Energies= -2025.359953

Cartesian coordinates

|   |           |           |           |
|---|-----------|-----------|-----------|
| C | -0.238995 | -0.625457 | -1.676299 |
| C | -0.505835 | 0.873744  | -1.504442 |
| C | 0.365542  | 1.588556  | -0.442808 |
| O | -0.900257 | -1.221962 | -2.596311 |
| C | 0.178196  | 3.103015  | -0.632489 |
| C | -0.660620 | 3.853498  | 0.189600  |

|   |           |           |           |
|---|-----------|-----------|-----------|
| C | 0.823336  | 3.728256  | -1.702083 |
| C | -0.849148 | 5.213626  | -0.051990 |
| H | -1.155183 | 3.387457  | 1.037185  |
| C | 0.637168  | 5.085831  | -1.940226 |
| H | 1.480930  | 3.148932  | -2.344903 |
| C | -0.200778 | 5.834243  | -1.115226 |
| H | -1.501169 | 5.787421  | 0.598796  |
| H | 1.148927  | 5.559983  | -2.771453 |
| H | -0.345118 | 6.893589  | -1.300122 |
| C | -0.083925 | 1.204685  | 0.914892  |
| N | -0.462904 | 0.872663  | 1.957266  |
| H | -0.280860 | 1.315950  | -2.479249 |
| C | -0.476382 | -1.407630 | -0.321205 |
| C | -1.616863 | -2.570257 | 1.146213  |
| C | -3.024449 | -1.394267 | -0.528414 |
| H | -2.789140 | -1.314608 | -1.595857 |
| N | -0.373007 | -2.861431 | 1.381133  |
| N | 0.327320  | -2.123501 | 0.464302  |
| N | -1.730985 | -1.668314 | 0.123416  |
| C | -2.813476 | -3.257546 | 1.736384  |
| H | -2.869148 | -3.069693 | 2.810491  |
| H | -2.683236 | -4.336396 | 1.576521  |
| C | -3.966514 | -2.583449 | -0.242517 |
| O | -4.011896 | -2.794781 | 1.164105  |
| C | -5.219734 | -0.588445 | -0.195011 |
| C | -3.874643 | -0.223047 | -0.058171 |
| C | -3.535274 | 1.040936  | 0.400868  |
| C | -4.553952 | 1.950288  | 0.695296  |
| C | -5.890136 | 1.596770  | 0.530617  |
| C | -6.231269 | 0.316734  | 0.089100  |
| C | -5.337911 | -2.032975 | -0.625982 |
| H | -2.504000 | 1.320675  | 0.568003  |
| H | -6.671366 | 2.313255  | 0.762928  |
| H | -7.272993 | 0.027370  | -0.012785 |
| H | -5.489478 | -2.122109 | -1.707370 |
| H | -6.136432 | -2.576659 | -0.116873 |
| C | 1.741703  | -2.406746 | 0.359388  |
| C | 2.127029  | -3.325143 | -0.625132 |
| C | 2.623306  | -1.875793 | 1.300961  |
| C | 3.473070  | -3.674237 | -0.678710 |
| C | 3.961699  | -2.267386 | 1.205532  |
| C | 4.404646  | -3.149162 | 0.221976  |
| H | 3.802161  | -4.381050 | -1.436406 |
| H | 4.671611  | -1.870403 | 1.926987  |

|   |           |           |           |
|---|-----------|-----------|-----------|
| C | 2.185898  | -0.928952 | 2.385603  |
| H | 1.162266  | -1.122587 | 2.710371  |
| H | 2.222236  | 0.109974  | 2.041214  |
| H | 2.850749  | -1.018482 | 3.246934  |
| C | 5.862037  | -3.512220 | 0.112584  |
| H | 6.368338  | -3.412601 | 1.075014  |
| H | 6.365716  | -2.848849 | -0.598610 |
| H | 5.989476  | -4.536450 | -0.245097 |
| C | 1.115471  | -3.923533 | -1.565900 |
| H | 0.619683  | -3.153095 | -2.166920 |
| H | 0.338957  | -4.456941 | -1.005880 |
| H | 1.597535  | -4.635792 | -2.237189 |
| H | -3.668762 | -3.498194 | -0.769961 |
| H | -4.294990 | 2.938799  | 1.060927  |
| C | 3.531612  | -0.327330 | -1.778430 |
| C | 2.133779  | 0.076047  | -1.407748 |
| H | 4.025719  | 0.475688  | -2.327383 |
| H | 4.126290  | -0.514640 | -0.881995 |
| H | 3.481912  | -1.230194 | -2.386261 |
| C | 1.812043  | 1.146819  | -0.628045 |
| C | 2.869847  | 1.894918  | 0.066655  |
| O | 2.345348  | 2.627402  | 1.067596  |
| O | 1.236793  | -0.750089 | -1.943191 |
| O | 4.063016  | 1.870732  | -0.165526 |
| C | 3.247852  | 3.477923  | 1.787335  |
| C | 2.396706  | 4.372276  | 2.661633  |
| H | 3.929554  | 2.853604  | 2.373343  |
| H | 3.844079  | 4.047913  | 1.069611  |
| H | 3.033136  | 5.029818  | 3.257918  |
| H | 1.735331  | 4.985228  | 2.044015  |
| H | 1.782707  | 3.771992  | 3.337388  |
| H | -1.568657 | 1.037220  | -1.312368 |

Vibrational frequencies

|          |          |          |
|----------|----------|----------|
| 5.0212   | 23.3250  | 32.1124  |
| 33.6485  | 39.1113  | 41.9015  |
| 46.8764  | 53.2828  | 53.7490  |
| 66.4326  | 77.1269  | 90.0878  |
| 93.9585  | 99.0437  | 107.9912 |
| 112.0713 | 123.0147 | 137.2878 |
| 145.6343 | 156.2580 | 158.9669 |
| 167.1770 | 170.7520 | 174.9483 |
| 181.8187 | 202.1552 | 206.5222 |
| 210.2702 | 231.2168 | 232.9280 |
| 241.0702 | 251.0163 | 252.7117 |

|           |           |           |
|-----------|-----------|-----------|
| 258.8345  | 274.2375  | 279.0675  |
| 285.4715  | 289.5304  | 294.3971  |
| 303.7785  | 320.4016  | 330.4088  |
| 334.6511  | 339.8118  | 343.9785  |
| 378.6248  | 387.4113  | 396.7244  |
| 410.1947  | 416.7410  | 430.7372  |
| 438.6368  | 446.2122  | 466.7370  |
| 474.4328  | 485.5736  | 493.4686  |
| 503.5466  | 509.6964  | 515.3180  |
| 531.4782  | 535.4901  | 552.0714  |
| 559.6324  | 568.8729  | 581.0603  |
| 589.1792  | 608.7045  | 619.6111  |
| 628.2913  | 630.6751  | 641.0947  |
| 647.6399  | 665.5221  | 679.8747  |
| 694.8057  | 709.2118  | 721.0467  |
| 727.8888  | 743.4697  | 758.4280  |
| 761.1410  | 771.5545  | 788.4397  |
| 792.1212  | 795.5797  | 804.4967  |
| 819.6306  | 838.1142  | 842.5395  |
| 873.2821  | 876.9591  | 879.1849  |
| 881.4482  | 888.7950  | 898.5640  |
| 917.3800  | 922.7204  | 923.2273  |
| 936.3132  | 950.3970  | 956.7894  |
| 968.6205  | 979.8975  | 981.3022  |
| 1006.9531 | 1007.2254 | 1013.2362 |
| 1016.9531 | 1019.1912 | 1029.2963 |
| 1033.1296 | 1040.5815 | 1044.2654 |
| 1045.3284 | 1049.5774 | 1053.8794 |
| 1056.1853 | 1062.5814 | 1064.6807 |
| 1067.9775 | 1071.8106 | 1072.0301 |
| 1074.0415 | 1074.5782 | 1098.8961 |
| 1108.6734 | 1112.0115 | 1130.0501 |
| 1132.7477 | 1152.3213 | 1162.0418 |
| 1175.4734 | 1180.1733 | 1181.5355 |
| 1187.5114 | 1194.8798 | 1197.7567 |
| 1200.8767 | 1213.9489 | 1215.3340 |
| 1233.6997 | 1236.2206 | 1254.2580 |
| 1268.4147 | 1277.6204 | 1279.6943 |
| 1286.9608 | 1303.7715 | 1307.7226 |
| 1314.6167 | 1318.6562 | 1322.0663 |
| 1336.4876 | 1337.6957 | 1339.8616 |
| 1345.6678 | 1359.6049 | 1363.9507 |
| 1367.0583 | 1370.1738 | 1376.9108 |
| 1381.8439 | 1406.5877 | 1407.7676 |

|           |           |           |
|-----------|-----------|-----------|
| 1415.7365 | 1418.2968 | 1421.2924 |
| 1431.0458 | 1443.5239 | 1449.2383 |
| 1454.3672 | 1464.6690 | 1474.7851 |
| 1476.3094 | 1477.3903 | 1479.9510 |
| 1484.6345 | 1492.4803 | 1493.1684 |
| 1494.3149 | 1495.6219 | 1496.6294 |
| 1503.7416 | 1504.5191 | 1505.9353 |
| 1509.4318 | 1517.5227 | 1520.4934 |
| 1532.0945 | 1532.9364 | 1538.2525 |
| 1549.7012 | 1571.8534 | 1663.2756 |
| 1674.4167 | 1679.1011 | 1682.6513 |
| 1687.6506 | 1694.3417 | 1695.4727 |
| 1710.4994 | 1821.2375 | 2400.0543 |
| 3061.2086 | 3067.5872 | 3069.9856 |
| 3082.3643 | 3083.4945 | 3088.7430 |
| 3093.5834 | 3099.5838 | 3099.9378 |
| 3109.1225 | 3117.9160 | 3131.6322 |
| 3139.2765 | 3142.5565 | 3152.1237 |
| 3154.1239 | 3162.3741 | 3167.8820 |
| 3168.0751 | 3169.3141 | 3172.6708 |
| 3175.1452 | 3177.6678 | 3178.0880 |
| 3196.4961 | 3199.5786 | 3204.5228 |
| 3206.4467 | 3207.8600 | 3209.8405 |
| 3213.6468 | 3216.6919 | 3222.1651 |
| 3227.6474 | 3236.6411 | 3269.2549 |

### TS8R

Zero-point correction= 0.670220

Thermal correction to Energy= 0.710727

Thermal correction to Enthalpy= 0.711671

Thermal correction to Gibbs Free Energy= 0.596917

Sum of electronic and zero-point Energies= -2025.275378

Sum of electronic and thermal Energies= -2025.234871

Sum of electronic and thermal Enthalpies= -2025.233927

Sum of electronic and thermal Free Energies= -2025.348681

Cartesian coordinates

|   |           |           |           |
|---|-----------|-----------|-----------|
| C | 0.423203  | 0.136039  | -1.919496 |
| C | -1.059502 | 0.158276  | -1.617104 |
| C | -1.556795 | -0.777716 | -0.498364 |
| O | 0.901131  | 0.735713  | -2.879904 |
| C | -3.089980 | -0.773701 | -0.595340 |
| C | -3.831428 | 0.183332  | 0.096120  |
| C | -3.744941 | -1.669442 | -1.442188 |
| C | -5.218598 | 0.223848  | -0.034214 |

|   |           |           |           |
|---|-----------|-----------|-----------|
| H | -3.328506 | 0.897829  | 0.745289  |
| C | -5.130150 | -1.629959 | -1.568028 |
| H | -3.173041 | -2.409533 | -1.997127 |
| C | -5.872598 | -0.685812 | -0.860073 |
| H | -5.786989 | 0.965721  | 0.517601  |
| H | -5.629210 | -2.339860 | -2.219728 |
| H | -6.953056 | -0.658548 | -0.955527 |
| C | -1.172411 | -0.336611 | 0.860641  |
| N | -0.896395 | -0.117314 | 1.962629  |
| H | -1.540990 | -0.184153 | -2.540340 |
| C | 1.264581  | 1.166505  | -0.422971 |
| C | 3.095696  | 2.325125  | 0.090866  |
| C | 3.491130  | 0.017833  | -0.742225 |
| H | 3.175108  | -0.338702 | -1.726660 |
| N | 2.118198  | 3.136832  | 0.355304  |
| N | 1.000203  | 2.404881  | 0.026760  |
| N | 2.621699  | 1.130831  | -0.380164 |
| C | 4.571343  | 2.563111  | 0.201856  |
| H | 4.793200  | 3.146622  | 1.095995  |
| H | 4.917103  | 3.121879  | -0.679739 |
| C | 4.970808  | 0.462509  | -0.783287 |
| O | 5.244211  | 1.327622  | 0.310815  |
| C | 4.799029  | -1.627851 | 0.349825  |
| C | 3.507784  | -1.105275 | 0.268869  |
| C | 2.470746  | -1.607263 | 1.042467  |
| C | 2.737356  | -2.687764 | 1.884749  |
| C | 4.018305  | -3.237746 | 1.945714  |
| C | 5.061654  | -2.706696 | 1.184783  |
| C | 5.739727  | -0.840820 | -0.536174 |
| H | 1.478618  | -1.162526 | 1.006609  |
| H | 4.210811  | -4.076543 | 2.607102  |
| H | 6.063083  | -3.120017 | 1.259828  |
| H | 5.916605  | -1.355497 | -1.487078 |
| H | 6.708962  | -0.635465 | -0.075768 |
| C | -0.290255 | 2.976975  | 0.294185  |
| C | -1.019506 | 3.540249  | -0.760289 |
| C | -0.741585 | 2.989086  | 1.615829  |
| C | -2.299892 | 4.008939  | -0.475239 |
| C | -2.029673 | 3.474863  | 1.851114  |
| C | -2.829475 | 3.960887  | 0.817669  |
| H | -2.894200 | 4.434767  | -1.280145 |
| H | -2.411362 | 3.474020  | 2.869085  |
| C | 0.148088  | 2.565315  | 2.753097  |
| H | 0.801100  | 3.396364  | 3.039314  |



|   |           |           |           |
|---|-----------|-----------|-----------|
| H | 0.777805  | 1.716965  | 2.480414  |
| H | -0.449354 | 2.278289  | 3.619598  |
| C | -4.236250 | 4.432524  | 1.078741  |
| H | -4.426661 | 5.391697  | 0.589979  |
| H | -4.425953 | 4.545253  | 2.147938  |
| H | -4.960714 | 3.714779  | 0.680475  |
| C | -0.421549 | 3.681146  | -2.135821 |
| H | -0.077511 | 2.727290  | -2.546058 |
| H | 0.450422  | 4.342669  | -2.094811 |
| H | -1.149113 | 4.118387  | -2.821828 |
| H | 5.230205  | 0.959600  | -1.726850 |
| H | 1.943002  | -3.097376 | 2.500414  |
| C | -0.901534 | -2.141402 | -0.682862 |
| C | 0.324682  | -2.228828 | -1.247379 |
| C | -1.566360 | -3.336262 | -0.120725 |
| C | 1.132954  | -3.475533 | -1.437031 |
| O | 1.008235  | -1.163540 | -1.716998 |
| O | -2.359299 | -2.990926 | 0.901593  |
| O | -1.458411 | -4.477356 | -0.521981 |
| H | 0.835316  | -4.260295 | -0.746380 |
| H | 0.993281  | -3.843648 | -2.458012 |
| H | 2.187421  | -3.226053 | -1.300235 |
| C | -3.328748 | -3.956872 | 1.336071  |
| C | -4.401488 | -3.188606 | 2.077248  |
| H | -3.726968 | -4.470633 | 0.456174  |
| H | -2.832381 | -4.698129 | 1.969349  |
| H | -4.869174 | -2.460442 | 1.407735  |
| H | -5.166749 | -3.875736 | 2.445484  |
| H | -3.972277 | -2.654782 | 2.928451  |
| H | -1.386885 | 1.182675  | -1.436644 |

Vibrational frequencies

|           |          |          |
|-----------|----------|----------|
| -213.8255 | 19.6030  | 23.7871  |
| 29.2027   | 37.2738  | 40.9749  |
| 47.9697   | 54.1179  | 59.9593  |
| 66.7725   | 72.2646  | 73.8483  |
| 78.9086   | 80.3748  | 92.6319  |
| 96.3070   | 101.0084 | 105.2717 |
| 126.1833  | 126.9873 | 131.3738 |
| 143.2544  | 144.4525 | 159.6986 |
| 174.3031  | 184.8774 | 199.8097 |
| 202.4498  | 212.4666 | 217.7377 |
| 228.3632  | 237.7100 | 248.4329 |
| 256.9133  | 262.8741 | 279.9690 |
| 284.6882  | 287.2246 | 291.3827 |

|           |           |           |
|-----------|-----------|-----------|
| 300.8123  | 312.2047  | 321.8691  |
| 322.0638  | 331.8628  | 336.2846  |
| 365.8959  | 381.8159  | 387.2410  |
| 409.3716  | 412.5307  | 418.2382  |
| 426.0053  | 439.3849  | 462.7867  |
| 476.0937  | 478.5139  | 488.4327  |
| 494.7899  | 505.6488  | 506.2346  |
| 520.1482  | 537.7116  | 541.5233  |
| 546.9757  | 558.1768  | 584.2447  |
| 587.0190  | 591.1958  | 604.9256  |
| 618.7584  | 628.4732  | 630.9924  |
| 632.2288  | 648.2062  | 674.2044  |
| 698.7999  | 703.9719  | 723.1793  |
| 726.2798  | 739.6233  | 754.3525  |
| 758.5129  | 764.4026  | 779.8831  |
| 786.7747  | 795.8748  | 803.0835  |
| 813.6184  | 838.7349  | 840.5763  |
| 866.5019  | 877.5927  | 877.6308  |
| 879.8214  | 882.5223  | 897.7874  |
| 909.9043  | 911.1667  | 919.0927  |
| 925.6488  | 953.0488  | 961.5944  |
| 968.3489  | 980.9848  | 986.4904  |
| 1005.4025 | 1009.2086 | 1012.2914 |
| 1017.1171 | 1023.6341 | 1025.3759 |
| 1025.8173 | 1041.5766 | 1047.6218 |
| 1050.0543 | 1053.1635 | 1058.2455 |
| 1061.7512 | 1062.2624 | 1064.7564 |
| 1065.9321 | 1068.8261 | 1073.9777 |
| 1074.1360 | 1083.0943 | 1096.3677 |
| 1113.5306 | 1117.2210 | 1127.7594 |
| 1138.6095 | 1147.4084 | 1155.0108 |
| 1171.9324 | 1174.3750 | 1176.9761 |
| 1184.7552 | 1187.7225 | 1199.2741 |
| 1203.3233 | 1213.1041 | 1216.9141 |
| 1234.5626 | 1249.6335 | 1253.2566 |
| 1260.4990 | 1277.4949 | 1280.7245 |
| 1286.5496 | 1301.3800 | 1302.7859 |
| 1309.1187 | 1310.0935 | 1332.8585 |
| 1335.7652 | 1338.4011 | 1342.4373 |
| 1351.2713 | 1355.5869 | 1358.4310 |
| 1362.4715 | 1364.9765 | 1378.2403 |
| 1387.8326 | 1405.5132 | 1412.6858 |
| 1418.3909 | 1419.3178 | 1421.2676 |
| 1426.5491 | 1439.1902 | 1440.0268 |

|           |           |           |
|-----------|-----------|-----------|
| 1458.1721 | 1461.4793 | 1466.0657 |
| 1473.4995 | 1474.1282 | 1476.3078 |
| 1488.7135 | 1491.3776 | 1493.3282 |
| 1493.9235 | 1497.6450 | 1498.1455 |
| 1499.6850 | 1500.3151 | 1503.5031 |
| 1509.2362 | 1516.3664 | 1522.6785 |
| 1528.8337 | 1533.7360 | 1549.3729 |
| 1562.9882 | 1677.9180 | 1682.0825 |
| 1682.5580 | 1688.0434 | 1695.3283 |
| 1698.3780 | 1700.3355 | 1705.0082 |
| 1714.4730 | 1825.7755 | 2413.4130 |
| 3061.6215 | 3071.1858 | 3073.6420 |
| 3075.5953 | 3077.6418 | 3080.3766 |
| 3082.0468 | 3090.7891 | 3093.5535 |
| 3094.1611 | 3139.5552 | 3142.2219 |
| 3142.9700 | 3144.3145 | 3151.2595 |
| 3154.2140 | 3158.2792 | 3165.8915 |
| 3166.0222 | 3168.2414 | 3172.3889 |
| 3174.9744 | 3181.9568 | 3183.9878 |
| 3189.4935 | 3190.3192 | 3192.2240 |
| 3193.7657 | 3194.6818 | 3204.5655 |
| 3208.2242 | 3212.7730 | 3213.1276 |
| 3214.5451 | 3223.9561 | 3229.4454 |

### TS8S

Zero-point correction= 0.670723

Thermal correction to Energy= 0.710988

Thermal correction to Enthalpy= 0.711932

Thermal correction to Gibbs Free Energy= 0.598234

Sum of electronic and zero-point Energies= -2025.277035

Sum of electronic and thermal Energies= -2025.236771

Sum of electronic and thermal Enthalpies= -2025.235826

Sum of electronic and thermal Free Energies= -2025.349524

Cartesian coordinates

|   |           |           |           |
|---|-----------|-----------|-----------|
| C | 0.324143  | -0.262680 | 2.004965  |
| C | 0.334433  | 1.187425  | 1.580140  |
| C | -0.692786 | 1.594499  | 0.496769  |
| O | 1.163187  | -0.733524 | 2.758183  |
| C | -0.926681 | 3.111708  | 0.646967  |
| C | -0.254949 | 4.040689  | -0.144990 |
| C | -1.781062 | 3.565076  | 1.654684  |
| C | -0.445072 | 5.406533  | 0.059615  |
| H | 0.409050  | 3.706118  | -0.936542 |
| C | -1.971517 | 4.928050  | 1.856248  |

|   |           |           |           |
|---|-----------|-----------|-----------|
| H | -2.304474 | 2.847158  | 2.280734  |
| C | -1.305012 | 5.854845  | 1.057119  |
| H | 0.081135  | 6.118617  | -0.567899 |
| H | -2.643772 | 5.265424  | 2.638489  |
| H | -1.455537 | 6.918068  | 1.212443  |
| C | -0.171137 | 1.331562  | -0.862996 |
| N | 0.226947  | 1.170206  | -1.937488 |
| H | 0.084765  | 1.746411  | 2.489489  |
| C | 0.781110  | -1.204351 | 0.159127  |
| C | 2.196978  | -2.463809 | -1.016457 |
| C | 3.277706  | -0.834320 | 0.509297  |
| H | 2.994666  | -0.682525 | 1.556582  |
| N | 1.026941  | -2.948818 | -1.294118 |
| N | 0.171564  | -2.151737 | -0.562920 |
| N | 2.097628  | -1.401525 | -0.152305 |
| C | 3.523061  | -3.043694 | -1.411324 |
| H | 3.606972  | -3.107329 | -2.497769 |
| H | 3.587674  | -4.059789 | -0.996990 |
| C | 4.446048  | -1.839764 | 0.407474  |
| O | 4.584215  | -2.241537 | -0.949844 |
| C | 5.296680  | 0.349091  | 0.143246  |
| C | 3.913074  | 0.426386  | -0.051773 |
| C | 3.342003  | 1.552015  | -0.625320 |
| C | 4.170970  | 2.616386  | -0.988805 |
| C | 5.545814  | 2.549698  | -0.776353 |
| C | 6.119344  | 1.408573  | -0.211287 |
| C | 5.674496  | -0.991425 | 0.731627  |
| H | 2.279238  | 1.598292  | -0.824700 |
| H | 6.177197  | 3.383641  | -1.065611 |
| H | 7.193777  | 1.345135  | -0.066070 |
| H | 5.812061  | -0.928480 | 1.816937  |
| H | 6.576914  | -1.424788 | 0.294563  |
| C | -1.184535 | -2.618019 | -0.437520 |
| C | -1.432266 | -3.542239 | 0.587031  |
| C | -2.151292 | -2.254869 | -1.375203 |
| C | -2.705637 | -4.100941 | 0.661399  |
| C | -3.415725 | -2.838074 | -1.253220 |
| C | -3.709344 | -3.758604 | -0.247527 |
| H | -2.917502 | -4.824266 | 1.445201  |
| H | -4.184630 | -2.571247 | -1.974627 |
| C | -1.861840 | -1.282211 | -2.485979 |
| H | -0.814030 | -1.316931 | -2.790697 |
| H | -2.067108 | -0.253547 | -2.170811 |
| H | -2.490228 | -1.500893 | -3.351957 |

|   |           |           |           |
|---|-----------|-----------|-----------|
| C | -5.091431 | -4.344243 | -0.120050 |
| H | -5.583910 | -4.414286 | -1.092464 |
| H | -5.715286 | -3.713603 | 0.522401  |
| H | -5.058448 | -5.340585 | 0.326584  |
| C | -0.343743 | -3.929519 | 1.553025  |
| H | -0.018357 | -3.067704 | 2.145595  |
| H | 0.530699  | -4.313012 | 1.016583  |
| H | -0.696445 | -4.705728 | 2.234304  |
| H | 4.308975  | -2.713833 | 1.057347  |
| H | 3.736564  | 3.498992  | -1.447395 |
| C | -3.292658 | -1.007707 | 1.906295  |
| C | -2.047641 | -0.260779 | 1.538874  |
| H | -4.015831 | -0.333155 | 2.367329  |
| H | -3.764362 | -1.422598 | 1.013718  |
| H | -3.028063 | -1.810763 | 2.593464  |
| C | -1.975036 | 0.794785  | 0.690934  |
| C | -3.172765 | 1.183834  | -0.081448 |
| O | -2.838294 | 2.010321  | -1.085019 |
| O | -0.980913 | -0.774536 | 2.185276  |
| O | -4.313988 | 0.813065  | 0.106760  |
| C | -3.907341 | 2.485914  | -1.915394 |
| C | -3.290767 | 3.462916  | -2.891514 |
| H | -4.368469 | 1.630355  | -2.418330 |
| H | -4.664573 | 2.954185  | -1.280331 |
| H | -4.054905 | 3.849729  | -3.569046 |
| H | -2.838848 | 4.300595  | -2.354731 |
| H | -2.514354 | 2.970189  | -3.481719 |
| H | 1.350495  | 1.468535  | 1.294853  |

Vibrational frequencies

|           |          |          |
|-----------|----------|----------|
| -143.8004 | 22.0159  | 30.1384  |
| 32.1011   | 33.2771  | 40.8848  |
| 45.6923   | 49.6277  | 53.3620  |
| 61.5194   | 74.9484  | 79.4211  |
| 83.0344   | 87.0558  | 91.6965  |
| 108.5276  | 110.4050 | 116.6763 |
| 127.6533  | 147.7226 | 151.1471 |
| 160.8563  | 167.9239 | 173.3721 |
| 181.1562  | 191.2720 | 197.9217 |
| 203.0397  | 210.9226 | 222.1264 |
| 233.3137  | 239.3299 | 245.2971 |
| 249.3315  | 256.1190 | 258.9879 |
| 282.9277  | 285.7203 | 287.4713 |
| 299.9952  | 305.6502 | 319.0076 |
| 324.7619  | 337.1923 | 346.2574 |

|           |           |           |
|-----------|-----------|-----------|
| 374.4447  | 377.7836  | 391.5288  |
| 400.0537  | 408.8524  | 413.8552  |
| 430.9760  | 438.4354  | 461.2249  |
| 475.0302  | 490.8492  | 495.1933  |
| 496.3180  | 501.8148  | 505.3714  |
| 519.9340  | 529.8587  | 542.1717  |
| 557.4852  | 562.7229  | 581.3472  |
| 585.7217  | 589.6190  | 609.4942  |
| 618.8265  | 629.6158  | 635.5937  |
| 636.5187  | 643.8927  | 676.6018  |
| 695.3068  | 705.2796  | 718.0149  |
| 725.5635  | 729.8438  | 748.6332  |
| 760.8473  | 767.5597  | 784.1427  |
| 787.8275  | 789.4204  | 811.6744  |
| 836.8595  | 837.8774  | 839.6775  |
| 869.7764  | 871.0489  | 878.0547  |
| 882.0235  | 888.4942  | 904.2182  |
| 910.6267  | 917.2461  | 922.5839  |
| 924.8177  | 948.4219  | 959.2594  |
| 969.8649  | 980.0080  | 985.1778  |
| 1000.3067 | 1005.5317 | 1010.5091 |
| 1020.2945 | 1021.2734 | 1023.3221 |
| 1026.5249 | 1043.0593 | 1044.7249 |
| 1047.2617 | 1050.9017 | 1054.6936 |
| 1059.9433 | 1063.4420 | 1065.4828 |
| 1067.6217 | 1069.6055 | 1075.3367 |
| 1076.2009 | 1078.7000 | 1091.9469 |
| 1109.5073 | 1115.5963 | 1128.5577 |
| 1149.1616 | 1157.5374 | 1167.7646 |
| 1178.6402 | 1178.9480 | 1183.0988 |
| 1185.8084 | 1190.8872 | 1194.4915 |
| 1204.9451 | 1209.4545 | 1213.7068 |
| 1231.0326 | 1231.8448 | 1252.8274 |
| 1271.1822 | 1280.2788 | 1282.2077 |
| 1286.5965 | 1294.8248 | 1296.0429 |
| 1311.8665 | 1320.9090 | 1335.1599 |
| 1335.9022 | 1337.9773 | 1340.5390 |
| 1352.0876 | 1354.4010 | 1356.2208 |
| 1361.9445 | 1365.7252 | 1380.1055 |
| 1383.9093 | 1403.1222 | 1406.4834 |
| 1410.5820 | 1411.9760 | 1419.4991 |
| 1423.0705 | 1433.1687 | 1441.1783 |
| 1460.9914 | 1463.2984 | 1467.2758 |
| 1470.1104 | 1473.5984 | 1474.1773 |

|           |           |           |
|-----------|-----------|-----------|
| 1479.5410 | 1491.7585 | 1494.2573 |
| 1494.4372 | 1495.8629 | 1499.0346 |
| 1501.3912 | 1503.3774 | 1504.3548 |
| 1509.4030 | 1519.1695 | 1521.3706 |
| 1530.2459 | 1534.6508 | 1549.8235 |
| 1562.5748 | 1681.8131 | 1683.4799 |
| 1683.8326 | 1686.3761 | 1695.4168 |
| 1697.4576 | 1698.5677 | 1708.8442 |
| 1757.9782 | 1824.1917 | 2406.4111 |
| 3059.0069 | 3066.0856 | 3072.0202 |
| 3080.4890 | 3080.9058 | 3084.1151 |
| 3091.5380 | 3092.1383 | 3092.3199 |
| 3099.6192 | 3121.0718 | 3137.0669 |
| 3139.6638 | 3144.0226 | 3147.8841 |
| 3152.0856 | 3162.3190 | 3162.8791 |
| 3166.2951 | 3167.6134 | 3168.2472 |
| 3172.0135 | 3176.1184 | 3178.9862 |
| 3184.4189 | 3194.0754 | 3194.7459 |
| 3194.9541 | 3202.9150 | 3204.2869 |
| 3209.7191 | 3212.7406 | 3217.2093 |
| 3229.0009 | 3229.9398 | 3264.2814 |

### PR/S

Zero-point correction= 0.285056

Thermal correction to Energy= 0.304530

Thermal correction to Enthalpy= 0.305474

Thermal correction to Gibbs Free Energy= 0.236134

Sum of electronic and zero-point Energies= -973.727965

Sum of electronic and thermal Energies= -973.708491

Sum of electronic and thermal Enthalpies= -973.707547

Sum of electronic and thermal Free Energies= -973.776887

Cartesian coordinates

|   |          |           |           |
|---|----------|-----------|-----------|
| C | 2.344081 | 2.422445  | -0.421645 |
| C | 0.938122 | 1.940073  | -0.285334 |
| H | 2.433935 | 3.376251  | 0.103520  |
| H | 3.062440 | 1.709334  | -0.030613 |
| H | 2.556867 | 2.605515  | -1.478978 |
| C | 0.489797 | 0.738838  | 0.118514  |
| C | 1.370539 | -0.336411 | 0.649067  |
| O | 0.085049 | 2.980349  | -0.581635 |
| O | 1.042368 | -1.026763 | 1.588163  |
| O | 2.513554 | -0.488607 | -0.022774 |
| C | 3.398391 | -1.512349 | 0.479861  |
| C | 4.641707 | -1.487511 | -0.379374 |

|   |           |           |           |
|---|-----------|-----------|-----------|
| H | 2.876662  | -2.471692 | 0.427544  |
| H | 3.615577  | -1.300952 | 1.530022  |
| H | 5.339843  | -2.253518 | -0.035221 |
| H | 4.393807  | -1.687680 | -1.423923 |
| H | 5.135833  | -0.515266 | -0.315309 |
| C | -1.267350 | 2.814859  | -0.699556 |
| C | -1.749042 | 1.392033  | -0.738856 |
| H | -2.825241 | 1.379536  | -0.567630 |
| C | -1.004461 | 0.468378  | 0.249182  |
| O | -1.952069 | 3.788262  | -0.824005 |
| C | -1.384346 | -0.977731 | -0.089067 |
| C | -2.373863 | -1.657291 | 0.616416  |
| C | -0.775806 | -1.590500 | -1.187319 |
| C | -2.748530 | -2.942926 | 0.229965  |
| H | -2.851476 | -1.191105 | 1.472999  |
| C | -1.148880 | -2.874747 | -1.568415 |
| H | -0.001113 | -1.065954 | -1.742213 |
| C | -2.137935 | -3.554753 | -0.860173 |
| H | -3.518671 | -3.465488 | 0.787526  |
| H | -0.664781 | -3.344458 | -2.418180 |
| H | -2.428376 | -4.557180 | -1.156220 |
| C | -1.412150 | 0.809715  | 1.629449  |
| N | -1.737657 | 1.118380  | 2.694586  |
| H | -1.554569 | 1.015335  | -1.749704 |

Vibrational frequencies

|           |           |           |
|-----------|-----------|-----------|
| 31.5223   | 42.4453   | 49.3732   |
| 69.5826   | 77.7659   | 86.7019   |
| 98.8001   | 111.2898  | 128.0694  |
| 141.9818  | 158.2971  | 175.8365  |
| 197.5173  | 233.2772  | 253.3452  |
| 268.2243  | 305.0734  | 311.8437  |
| 324.8972  | 351.0602  | 396.6302  |
| 416.5252  | 423.6053  | 457.5512  |
| 474.9991  | 492.8747  | 539.3632  |
| 552.0124  | 572.0550  | 612.5217  |
| 631.2120  | 659.1966  | 686.5512  |
| 700.0183  | 720.5550  | 778.3904  |
| 789.2055  | 816.7912  | 839.1064  |
| 854.7027  | 877.1278  | 903.1416  |
| 915.0798  | 939.2441  | 952.8227  |
| 1005.8817 | 1014.6088 | 1029.3638 |
| 1029.9904 | 1061.7082 | 1065.9082 |
| 1073.5816 | 1081.4162 | 1116.0903 |
| 1130.8601 | 1140.5430 | 1155.9963 |



|           |           |           |
|-----------|-----------|-----------|
| 1184.2787 | 1188.3342 | 1188.9761 |
| 1218.5529 | 1243.2855 | 1249.8714 |
| 1278.3594 | 1300.3595 | 1307.0890 |
| 1345.3097 | 1352.4275 | 1369.7757 |
| 1374.5111 | 1417.0210 | 1428.5333 |
| 1449.2398 | 1456.4174 | 1482.7320 |
| 1485.6810 | 1494.3953 | 1504.9417 |
| 1510.0389 | 1532.1636 | 1554.6513 |
| 1683.9226 | 1700.3820 | 1751.8350 |
| 1839.3839 | 1925.8364 | 2421.2756 |
| 3084.0372 | 3090.5054 | 3096.4636 |
| 3106.9115 | 3154.4877 | 3157.2058 |
| 3170.5038 | 3177.6437 | 3180.1147 |
| 3198.9187 | 3211.6485 | 3217.8001 |
| 3229.1183 | 3237.5151 | 3248.5935 |

#### References

- (1) (a) R. G Parr and R. G. Pearson, *J. Am. Chem. Soc.* 1983, 105, 7512-7516; (b) L. R. Domingo, M. T. Picher and J. A. Sáez. *J. Org. Chem.* 2009, 74, 2726-2735.
- (2) (a) W. Kohn and L. J. Sham. *Phys. Rev.* 1965, 140, A1133; (b) L. J. Sham and W. Kohn. *Phys. Rev.* 1966, 145, 561.
- (3) (a) L. R. Domingo and E. Chamorro. *Eur. J. Org. Chem.* 2009, 2009, 3036-3044. (b) L. R. Domingo, E. Chamorro and P. Perez. *J. Phys. Chem. A* 2008, 112, 4046-4053. (c) L. R. Domingo, P. Pérez and J. A. Sáez. *RSC Adv.* 2013, 3, 1486-1494. (d) L. R. Domingo and P. Perez. *Org. Biomol. Chem.* 2011, 9, 7168-7175.
